# Supplementary material for: Proximity-ligation metagenomics reveals disease-specific mobilome dynamics in disrupted gut ecosystems
Source: Research Square preprint supplement (doi:10.21203/rs.3.rs-9142184/v1), 2026-03-25
Supplement: Supplementary file 1 [file 05cf1da4703c42e7e94a7cdd.docx]

**Extended data results**

**Human subjects:**

Richmond cohort: Age and gender were statistically similar between controls, compensated and decompensated cirrhosis. The mean±SD ages were 59±8 years, 60±9 years, and 61±12 years respectively. All controls and compensated patients were men, while 11 (79%) of the decompensated patients were men. Diabetes prevalence was similar among cirrhosis groups (40% vs 36%), as was non-selective beta-blocker (40% vs 30%) and PPI use (60% vs 57%). Alcohol-related etiological contributions were also similar between cirrhosis subgroups (40% vs 36%). MELD-Na, as expected, was higher in decompensated versus compensated patients (15±4 vs 8±3), 7 (50%) of the decompensated patients were on rifaximin, 7 (50%) had ascites on diuretics, and 14 (100%) were on lactulose.

Minnesota cohort: The mean age of rCDI patients was 64 ± 16 years, and 82% were women. PPI use was seen in 30%. Underlying IBD was present in 3 patients, all in full remission. rCDI was treated in 32 (patients 94%) with vancomycin, 12 (35%) were on fidaxomicin, and 3 received rifaximin therapy. Preceding antibiotics and infection triggers that resulted in rCDI varied between individuals. Healthy controls (5 men and 4 women) in Minnesota had a mean±SD age of 39±9 years.
