# Supplementary material for: Proximity-ligation metagenomics reveals disease-specific mobilome dynamics in disrupted gut ecosystems
Source: Research Square preprint supplement (doi:10.21203/rs.3.rs-9142184/v1), 2026-03-25
Supplement: Supplementary file 2 [file 9661a57c7033d5f30029a1c3.docx]

**HUMAN SUBJECT DETAILS**

After IRB approval and informed consent, we enrolled participants at 2 sites; Richmond VAMC and the University of Minnesota Medical Center.

**Cirrhosis patients and healthy controls (Richmond)**

We included outpatients with cirrhosis and healthy controls from Richmond VA Medical Center (Protocol BAJAJ004). Healthy controls did not have any chronic disease and were not on any prescription medications. Cirrhosis was diagnosed using liver biopsy, or history of or current decompensation (variceal bleeding, hepatic encephalopathy, ascites), or presence of varices in the setting of chronic liver disease, or transient elastography >12.5KPa. Patients unable to consent or provide stool samples, or with current or recent (<4 weeks) antibiotics (apart from rifaximin), inflammatory bowel disease, or prior CDI were excluded. Patients were considered compensated if they had not experienced any prior decompensation. Patients considered to have decompensated cirrhosis had prior variceal bleeding, hepatic encephalopathy, or ascites.

**rCDI patients and healthy controls (Minneapolis)**

The rCDI patient cohort consisted of 30 patients. All rCDI patients suffered at least two spontaneous recurrences of CDI without a new antibiotic provocation following the initial CDI episode. The collection and analysis of fecal samples was approved by the University of Minnesota Institutional Review Board (STUDY00003519).

Healthy controls included nine Minnesota subjects (4 women and 5 men). Similar to the Richmond healthy individuals, these subjects did not have any chronic diseases and were not on any prescription medications.

**Collection of fecal material for analysis**

Fecal samples from all patients were collected using Puritan HydraFlock swabs placed into 1 mL of the DNA/RNA preservative (Puritan Medical Products, Avantor, Radnor, PA). The samples were stored at -80 degree C until extraction at local laboratories before being sent to the Phase Genomics laboratory.

**MICROBIOME ANALYSIS**

**Hi-C and Shotgun Library Prep**

Hi-C libraries were prepared using the Phase Genomics ProxiMeta Kit v4.0 according to the manufacturer protocol (Phase Genomics, Seattle, WA)1. Briefly, ~0.5 g of fecal material was crosslinked (15 min), quenched (20 min), and rinsed. The sample underwent bead-beating lysis for 20 minutes, followed by centrifugation to isolate and wash the nuclear pellet. After a 15-minute incubation at 65°C in lysis buffer, chromatin was recovered on magnetic beads, fragmented (1 hr at 37°C), and proximity-ligated (4 hr at room temperature). Following reverse-crosslinking at 65°C, Hi-C junctions were purified via streptavidin beads and prepared for sequencing. For shotgun libraries, non-crosslinked DNA was extracted using the ZymoBIOMICS DNA Miniprep Kit and prepared with the Watchmaker DNA Library Prep Kit. Libraries were sequenced PE150 on an Illumina NovaSeq X platform

**Metagenome Assembly and Deconvolution**

Shotgun reads were trimmed and filtered using fastp (v0.20.1) using defaults for read quality filtering and adapter trimming before assembly with MEGAHIT (v1.2.9)2,3. Hi-C reads were then aligned to the resulting contigs using BWA-MEM (v0.7.17) with the -5SP option4. PCR duplicates and non-primary alignments were removed via SAMBLASTER (version 0.1.24) and SAMtools (version 1.9, command -F 2304) was used to remove primary and secondary alignments; contigs under 1 kb were excluded5,6. The final assembly was deconvoluted into high-quality metagenome-assembled genomes (MAGs) using the ProxiMeta platform7, which clusters contigs based on both shotgun and Hi-C data. Finally, MAG quality was verified with CheckM (version 1.1.3)8, and taxonomy was assigned using Mash (version 2.1) and GTDB-Tk (v2.4.0)9,10.

**Viral Annotation and Binning**

Viral contigs were identified using VIBRANT (v1.2.1). Contigs were classified as prophages if viral annotations exceeded 50% of the sequence length; otherwise, they were labeled microbial. To reconstruct viral metagenome-assembled genomes (vMAGs), ProxiPhage utilizes a hybrid strategy combining proximity ligation signal clustering with traditional binning. An overlap network was constructed to identify shared contigs, followed by a proprietary greedy network collapse algorithm to refine the clusters. Finally, each vMAG was adjusted based on Hi-C linkage strength to ensure high-quality, low-contamination clusters11.

**Plasmid Identification and Binning**

To distinguish plasmid sequences within the assembly, all resulting contigs were subjected to a BLASTn search against a curated version of the PLSDB database (v. 2020_06_29). This comparative analysis focused on identifying homologous sequences by prioritizing the "best hit" for each query. Specifically, the evaluation of hit quality was restricted to the primary alignment, ensuring that noise from lower-confidence secondary matches did not influence the classification. The identification process utilized a multi-tiered filtering approach to ensure that only high-confidence plasmid candidates were retained. A minimum 90% nucleotide identity was required between the query contig and the reference sequence to establish a significant evolutionary or functional link. To eliminate false positives arising from short, conserved motifs or technical artifacts, a floor of 100 base pairs (bp) was set for all alignments. Further, a contig was definitively labeled a plasmid only if at least 50% of the query contig’s length aligned to the reference, and the alignment covered at least 50% of the total reference plasmid length. Hi-C data was also used to bin plasmid contigs into multi-contig plasmid bins (pMAGs). The same logic from the ProxiPhage algorithm was used for binning plasmid contigs11.

**AMR Gene Annotation**

Antimicrobial resistance (AMR) genes were annotated from the metagenomic assembly using AMRFinderPlus (version 3.10.5) with the --plus option enabled, and default parameters12. AMR gene annotations were cross-referenced with MAG taxonomic assignments and the host-viral and host-plasmid association matrices generated by ProxiMeta to determine the origin of AMR genes (i.e., genomic, viral, or plasmid). A binary matrix was created to track the presence of AMR genes in each MAG and classify their origin accordingly.

**Viral and Plasmid MAG Validation and Host Assignment**

The quality of viral contigs and vMAGs was assessed using CheckV (version 1.0.1).13 For plasmids, completion and contamination values were estimated based on the percentage of aligned sequences and the total length of aligned contigs relative to the reference sequences. Both viral and plasmid host assignment was carried out using the ProxiPhage host attribution tool11. Long-range Hi-C linkages between viral/plasmid contigs and their prokaryotic host genomes were analyzed to assign likely hosts. Viral-host and plasmid-host linkages were filtered based on Hi-C linkage strength, connectivity ratios, and intra-MAG connectivity.

In brief, the full quality criteria for filtered hits are:

- Hi-C Read Links: Must have at least 2 Hi-C read links.
- Connectivity Ratio: Must be ≥ 0.1.
- Copy Number: Must meet a threshold determined by a ROC curve of the fraction of all hits kept vs the fraction of viruses with one host, modifying a threshold of mobile element copy count per cell. The optimal cut-off was determined from the ROC curve as the value that produces the point to the top left of the plot, or the cut-off that removed the maximum number of virus-host links while still finding at least one host for the maximum number of viruses.
- Connections with an average copy count less than 80% of the highest copy count are removed to avoid false positives.

**Downstream Analysis of Identified MAGs, Plasmids, and ARGs/VFs**

Read counts of microbial MAGs with at least 70% completeness and less than 5% contamination were summed and used to estimate taxonomic composition of reads within each sample. Sample level relative abundance of genomic features was visualized using ggplot2 (version 4.0.1) in R (version 4.4.2)14. Differential abundance analysis of microbial MAGs was performed at the family level using ANCOM-BC (v2.8.1) on summed read counts of high-quality MAGs15. Low prevalence bacterial families (present in <10% of samples) were removed prior to analysis to reduce the number of zeros in the dataset. ANCOM-BC (lib_cut = 0, BH correction) was used to estimate bias-corrected log-fold changes in bacterial family abundances between the healthy reference group and both rCDI and decompensated cirrhosis samples. The log-fold changes of significant bacterial families identified by ANCOM-BC were visualized using ggplot213.

Read counts were summed for plasmid and viral MAGs with at least 50% completeness and less than 5% contamination to estimate the proportion of mobilome reads assigned to different bacterial taxa. Relative plasmid load within each sample was determined by summing the TPM of plasmid bins at the family level. Statistical differences between treatment groups were assessed using a Wilcoxon ranked sum test (‘Rstatix’ package, version 0.7.2) with a Benjamini–Hochberg p-value correction to control the false discovery rate.

To identify ARG and VF load between samples, AMRFinderPlus feature tables were generated as described above and then filtered to remove general stress response genes and retain only hits with at least 90% adjusted coverage (defined as percent coverage against reference gene multiplied by the percent identity). Differences in ARG abundances between groups were assessed using Wilcoxon ranked sum test with a Benjamini–Hochberg p-value correction. Spearman rank correlations were used to assess relationships between VFs and ARGs.

1. Lieberman-Aiden, E. *et al.* Comprehensive Mapping of Long-Range Interactions Reveals Folding Principles of the Human Genome. *Science* **326**, 289–293 (2009).

2. Chen, S., Zhou, Y., Chen, Y. & Gu, J. fastp: an ultra-fast all-in-one FASTQ preprocessor. *Bioinformatics* **34**, i884–i890 (2018).

3. Li, D., Liu, C.-M., Luo, R., Sadakane, K. & Lam, T.-W. MEGAHIT: an ultra-fast single-node solution for large and complex metagenomics assembly via succinct *de Bruijn* graph. *Bioinformatics* **31**, 1674–1676 (2015).

4. Li, H. & Durbin, R. Fast and accurate long-read alignment with Burrows–Wheeler transform. *Bioinformatics* **26**, 589–595 (2010).

5. Faust, G. G. & Hall, I. M. *SAMBLASTER* : fast duplicate marking and structural variant read extraction. *Bioinformatics* **30**, 2503–2505 (2014).

6. Li, H. *et al.* The Sequence Alignment/Map format and SAMtools. *Bioinformatics* **25**, 2078–2079 (2009).

7. Press, M. O. *et al.* Hi-C deconvolution of a human gut microbiome yields high-quality draft genomes and reveals plasmid-genome interactions. Preprint at https://doi.org/10.1101/198713 (2017).

8. Parks, D. H., Imelfort, M., Skennerton, C. T., Hugenholtz, P. & Tyson, G. W. CheckM: assessing the quality of microbial genomes recovered from isolates, single cells, and metagenomes. *Genome Res.* **25**, 1043–1055 (2015).

9. Ondov, B. D. *et al.* Mash: fast genome and metagenome distance estimation using MinHash. *Genome Biol* **17**, 132 (2016).

10. Chaumeil, P.-A., Mussig, A. J., Hugenholtz, P. & Parks, D. H. GTDB-Tk v2: memory friendly classification with the genome taxonomy database. *Bioinformatics* **38**, 5315–5316 (2022).

11. Uritskiy, G. *et al.* Accurate viral genome reconstruction and host assignment with proximity-ligation sequencing. Preprint at https://doi.org/10.1101/2021.06.14.448389 (2021).

12. Feldgarden, M. *et al.* AMRFinderPlus and the Reference Gene Catalog facilitate examination of the genomic links among antimicrobial resistance, stress response, and virulence. *Sci Rep* **11**, 12728 (2021).

13. Nayfach, S. *et al.* CheckV assesses the quality and completeness of metagenome-assembled viral genomes. *Nat Biotechnol* **39**, 578–585 (2021).

14. Villanueva, R. A. M. & Chen, Z. J. ggplot2: Elegant Graphics for Data Analysis (2nd ed.). *Measurement: Interdisciplinary Research and Perspectives* **17**, 160–167 (2019).

15. Lin, H. & Peddada, S. D. Analysis of compositions of microbiomes with bias correction. *Nat Commun* **11**, 3514 (2020).
