# Supplementary material for: Proximity-ligation metagenomics reveals disease-specific mobilome dynamics in disrupted gut ecosystems
Source: Research Square preprint supplement (doi:10.21203/rs.3.rs-9142184/v1), 2026-03-25
Supplement: Supplementary file 3 [file bd174c65c13fa10a4657c398.xlsx]

## Sheet: rCDI Cohort
ID	Age	Sex	Trigger Abx Indications	Trigger Abx	Duration of CDI treatment	CDI Abx	Hospitalization	Hospitalization for CDI specifically	Distant Hx of CDI	GI Co-morbidities	Immunosuppression	Other
CD01	82	M	Skin infection (after surgery)	Unknown	13	vancomycin	No	No	No
CD02	72	F	Procedure prophylaxis, perforated diverticulitis, partal colon resection	Various	14	vancomycin, rifaximin	Yes	No	No		Abatacept	Dialysis
CD03	36	F	C-section, UTIs, urosepsis, bacteremia	ciprofloxacin, ceftriaxone	8	vancomycin, fidaxomicin	Yes	Yes	No		Prednisone (for misdiagnosed UC)
CD04	50	M	Prostatitis, sinusitis, dental prophylaxis	levofloxacin, clindamycin, metronidazole	3	vancomycin	No	No	No		HIV
CD05	71	F	complicated diverticulitis, sigmoidectomy, abdominal abcess	ertapenem and other	5	vancomycin	Yes	Yes	No
CD06	46	F	Sinusitis	amoxicillin-clavulanate	5	vancomycin	No	No	No
CD07	41	F	Prophylaxis for neck surgery	cefazolikn	6	vancomycin, fidaxomicin	No	No	Yes
CD08	69	M	Carpal tunnel surgery prophylaxis	cefazolin	6	vancomycin	No	No	Yes
CD09	68	F	UTIs (E. coli, Citrobacter)	sulfamethoxazole-trimethoprim	7	vancomycin	No	No	No		Adalimumab for RA
CD10	64	F	Uncomplicated diverticulitis	ciprofloxacin, Metronidazole	5	vancomycin	No	No	Yes	Lymphocytic colitis
CD11	66	F	UTIs, pneumonia	amoxicillin-clavulanate	> 3 years	vancomycin, fidaxomicin	Yes	No	No
CD12	94	M	Surgery prophylaxis, foot ulcer	cefazolin, clindamyin, sulfamethoxazole-trimethorpim	14	vancomycin, fidaxomicin, rifaximin	Yes	No	No
CD13	76	F	Lumbar surgery, pneumonia, UTIs	sulfamethoxazole-trimethoprim , azithromycin, ceftriaxone	7	vancomycin, fidaxomicin	Yes	Yes	No
CD14	43	F	s// cholecystectomy	cefazolin	2	vancomycin, fidaxomicin	No	No	Yes	Crohn's disease
CD15	74	F	knee wound	Unclear	7	vancomycin	Yes	No	No
CD16	53	F	Nissen fundoplication, several orthopedic surgeries, recurrent UTIs	cefazolin, other	16	vancomycin	Yes	No	No
CD17	65	F	Pneumonia, MI, multiple other	Various	> 3 years	vancomycin	Yes	No	No
CD18	68	F	Complicated UTIs (kidney stones)	amoxicillin-clavulanate, ciprofloxacin, cephazolin	12	vancomycin	Yes	No	No
CD19	72	F	Surgery prophylaxis	clindamycin	2	vancomycin	Yes	No	Yes
CD20	50	F	s/p TPIAT, recurrent sepsis syndrome	(piperacillin and tazobactam), cephalosporins,	7	vancomycin, rifaximin	Yes	Yes	Yes
CD21	86	F	UTIs	cephlexin	5	vancomycin, metronidazole	No	No	No
CD22	51	M	Uncomplicated diverticulitis	ciprofloxacin, metronidazole	4	vancomycin	No	No	No	IBS
CD23	74	F	Dental infection	clindamycin	5	vancomycin, fidaxomicin, rifaximin	No	No	No
CD24	73	F	Dental infection	clindamycin	3	vancomycin	No	No	No
CD25	20	M	Unclear	Unclear	> 12 months	vancomycin	No	No	Yes	PSC, Crohn's (PSC colitis)	vedolizumab
CD26	65	F	Toe infection	ciprofloxacin	7	vancomycin, fidaxomicin	No	No	No
CD27	37	F	Skin infections following surgeries	Multiple courses, including amoxicillin-clavulanate, lefofloxacin, ampicillin-sulbactam	6	vancomycin, fidaxomicin	Yes	No	No
CD28	74	F	Oral surgery	clindamycin	5	vancomycin, fidaxomicin	No	No	No		Enbrel, methotrexate for RA
CD29	72	F	Dental infection	clindamycin	3	vancomycin, metronidazole	No	Yes	No
CD30	84	F	Dental infection	amoxicillin	9	vancomycin	No	No	No	IBS
CD31	58	F	Complicagted UTIs (kidney stones)	cephalexin	11	vancomycin, fidaxomicin	Yes	No	No
CD32	75	F	n/a	n/a	n/a	n/a	n/a	n/a	n/a
CD33	81	F	Sinusitis	amoxicillin-clavulanate	4	vancomycin	No	No	No	Partial colectomy
CD34	70	F	Stem cell transplant	multiple	9	fidaxomicin	Yes	No	No

## Sheet: Liver Cohort
ID	90 day prior hospitalization	90 day prior procedure	90 day POST hospitalization	90 Day AE's	Date of Starting App	Age	Gender	Cirrhosis	Race 0-White 1-AA 2-H 3-Other	Cirrhosis Etiology	Diabetes	Insulin	PPI	Beta Blocker use	Lactulose use	Rifaximin use	Ascites current	On diuretics	Notes	SBP Prophylaxis	Prior variceal bleeding
LC01	No	No	No	Yes, Came to ER for SOB, CP but no hospitalization	2022-12-06	71	M	Compensated	1	HCV+Alcohol	0	0	0	0	0	0	0	0		0	0
LC02	No	Yes, Colonoscopy(same day as stool collection) and was likely taking Go-lytely, also had rotator cuff surgery(4 months prior 9/8/22)	No	No	2023-01-10	67	M	Compensated	0	MASH	1	0	1	1	0	0	0	0		0	0
LC03	No	Yes, EGD/colonoscopy 2 months prior	No	No	2023-04-05	65	M	Compensated	1	HCV+Alcohol	1	1	1	0	0	0	0	0		0	0
LC04	No	No	No	No	2023-03-20	70	M	Compensated	1	HCV	0	0	0	1	0	0	0	0		0	0
LC05	Yes, Type 1 NSTEMI	Yes, Carotid duplex	No	No	2023-04-18	64	M	Compensated	0	MASH	0	0	1	3	0	0	0	0		0	0
LC06	Yes, Acute blood loss anemia, likely from subacute variceal bleed	Yes, Many paracentesis	Yes, post procedure monitoring after TIPS and alfa pump removal	No	2022-11-03	62	M	Decompensated	0	MASH	1	1	1	0	1	0	1	0	Was using alfapump	0	1
LC07	No	Yes, EGD and variceal banding	No	Yes, Again had EGD and variceal banding	2022-11-10	69	M	Decompensated	0	MASH	0	0	1	1	1	0	1	1	Spironolactone 25mg	0	0
LC08	No	No	No	No	2022-11-14	74	M	Decompensated	1	HCV	0	0	0	0	1	0	0	0		0	0
LC09	No	Yes, Patient came to ED for body weakness, cough, chills	No		2022-12-14	71	M	Decompensated	1	Alcohol	1	0	1	0	1	1	0	0		0	0
LC10	No	Yes, Patient had flu like symtopms about 10 days before study	No	No	2022-12-15	76	M	Decompensated	0	MASH	1	1	1	1	1	0	0	0		0	0
LC11	No	No	No	No	2023-01-13	70	M	Decompensated	0	HCV	0	0	0	0	1	0	0	0		0	0
LC12	No	Yes, Patient came to ED for anemia	No	No	2023-01-30	74	M	Decompensated	0	MASH	1	0	1	1	1	1	0	1	No evidence of ascites on lasix 60mg	0	0
LC13	No	Yes, Esophageal banding	No	No	2023-02-27	53	F	Decompensated	0	Alcohol	0	0	0	0	1	1	1	1	Spironolactone/Furosemide	0	0
LC14	Yes, Large right pleural effusion, hepatic hydrothorax,	Yes, Thoracentesis	Yes, Multiple hospitalization for HE, SOB, and bacteria Enterococcus faecalis. Pt was transplanted within 90 days of study	No	2023-03-08	66	F	Decompensated	0	Alcohol	0	0	1	0	1	1	1	1	Getting thoracentesis/paracentesis	0	0
LC15	Yes, Admitted for decompensated cirrhosis	Yes, EGD	Yes, Bradycardia with pauses s/p PPM	No	2023-05-01	74	M	Decompensated	1	MASH	1	0	0	0	1	0	1	1	Furosemide/spironolactone	0	0
LC16	No	No	Yes, Infected inguinal hernia inscional site	Yes, Constipation, inguinal hernia repair	2023-06-21	34	M	Decompensated	0	Alcohol	0	0	0	1	1	0	0	0		0	0
LC17	No	No	No	No	2023-08-29	55	M	Decompensated	0	Met-ALD	0	0	1	0	1	1	1	1	Spironolactone/Furosemide	0	0
LC18	No	No	No	No	2023-10-10	74	M	Decompensated	1	HCV	0	0	1	0	1	1	0	0		0	0
LC19	No	No	No	Yes, Mild constipation	2023-06-12	53	F	Decompensated	0	Alcohol	0	0	0	0	1	1	1	1	Spironolactone/Furosemide	0	0

## Sheet: Sequencing Metrics
Sample Metadata and Sequencing Metrics. Bacterial MAGs were filtered using a 5% contamination and 70% completeness cutoff; plasmid and viral (phage) MAGs were filtered using a 5% contamination and 50% completeness cutoff. Post-filtering Plasmid and Viral MAGs includes both complete MAGs as well as independent contigs.
Sample ID	Treatment Group	Total Reads	Number Post-Filtering Bacterial MAGs	Number Post-Filtering Plasmid MAGs	Number Post-Filtering Phage MAGs
CD01	rCDI	61924973	28	10	14
CD02	rCDI	45173972	12	11	5
CD03	rCDI	50541485	21	11	22
CD04	rCDI	39975452	12	25	17
CD05	rCDI	48455476	16	12	17
CD06	rCDI	18589145	15	9	11
CD07	rCDI	36011437	13	17	19
CD08	rCDI	68242983	14	10	56
CD09	rCDI	29375556	8	16	13
CD10	rCDI	65777105	17	13	28
CD11	rCDI	35158793	18	13	17
CD12	rCDI	57955799	17	11	28
CD13	rCDI	44946117	11	9	11
CD14	rCDI	55184545	14	25	16
CD15	rCDI	76534465	37	12	18
CD16	rCDI	45871923	17	16	25
CD17	rCDI	42430126	38	19	30
CD18	rCDI	86282894	30	13	33
CD19	rCDI	38042868	25	10	34
CD20	rCDI	30575410	12	10	15
CD21	rCDI	75936734	21	8	59
CD22	rCDI	72987776	35	11	23
CD23	rCDI	44171586	17	9	17
CD24	rCDI	55834878	24	20	33
CD25	rCDI	35216121	19	13	12
CD26	rCDI	31651283	17	13	18
CD27	rCDI	52436194	19	14	26
CD28	rCDI	45979693	35	5	17
CD29	rCDI	19441608	19	13	11
CD30	rCDI	34685834	10	5	9
CD31	rCDI	62829139	27	18	20
CD32	rCDI	68339968	25	9	32
CD33	rCDI	67102041	29	17	27
CD34	rCDI	48614352	7	7	11
HC01	Healthy (liver study)	90672187	70	3	80
HC02	Healthy (liver study)	89932387	31	12	85
HC03	Healthy (liver study)	56834244	39	6	31
HC04	Healthy (liver study)	98202825	99	12	99
HC05	Healthy (fecal donor)	66137919	42	5	67
HC06	Healthy (fecal donor)	143767078	101	7	89
HC07	Healthy (fecal donor)	72029884	26	5	85
HC08	Healthy (fecal donor)	68443777	25	12	60
HC09	Healthy (fecal donor)	39139585	29	8	62
HC10	Healthy (fecal donor)	49513457	28	7	61
HC11	Healthy (fecal donor)	87034946	37	2	64
HC12	Healthy (fecal donor)	66400137	8	14	58
HC13	Healthy (fecal donor)	67891012	63	2	86
LC01	Compensated liver cirrhosis	117327415	42	11	94
LC02	Compensated liver cirrhosis	78328144	59	20	87
LC03	Compensated liver cirrhosis	27385582	17	5	24
LC04	Compensated liver cirrhosis	78263053	54	12	55
LC05	Compensated liver cirrhosis	69256219	56	7	48
LC06	Decompensated liver cirrhosis	81757433	46	8	44
LC07	Decompensated liver cirrhosis	70822549	52	13	33
LC08	Decompensated liver cirrhosis	128075432	91	14	103
LC09	Decompensated liver cirrhosis	121857147	49	4	49
LC10	Decompensated liver cirrhosis	74838097	43	9	31
LC11	Decompensated liver cirrhosis	65932746	26	12	48
LC12	Decompensated liver cirrhosis	34285730	9	10	6
LC13	Decompensated liver cirrhosis	64274650	38	13	37
LC14	Decompensated liver cirrhosis	62321979	38	8	31
LC15	Decompensated liver cirrhosis	42778870	21	6	14
LC16	Decompensated liver cirrhosis	65198735	32	5	20
LC17	Decompensated liver cirrhosis	69177337	42	5	47
LC18	Decompensated liver cirrhosis	61669436	43	7	59
LC19	Decompensated liver cirrhosis	50896978	35	7	20

## Sheet: Microbial MAGs
Summary of constructed microbial MAGs. Table includes summary information for bacterial (n= 2068) and archeal (n= 14) MAGs after filtering using a 5% contamination and 70% completeness cutoff. Reported values include genome quality metrics as well as the abundance of each MAG in the sample from which it was reconstructed.
Sample ID	Treatment Group	Genome Bin	Number of Contigs	N50	GC Percent	Mean Contig Length	Completeness	Contamination	Domain	Phylum	Class	Order	Family	Genus	Species	Read.Count	Genome.Length	RPM	RPKM	RPK	TPM
HC01	Healthy	HC01_bin80	25	226124	31.05	71606	100	0	Archaea	Methanobacteriota	Methanobacteria	Methanobacteriales	Methanobacteriaceae	Methanobrevibacter_A	Methanobrevibacter_A smithii	606971	1790151	6499.25	3.63056	339.061	2092.78
HC01	Healthy	HC01_bin80	25	226124	31.05	71606	100	0	Archaea	Methanobacteriota	Methanobacteria	Methanobacteriales	Methanobacteriaceae	Methanobrevibacter_A	Methanobrevibacter_A smithii	606971	1790151	6499.25	3.63056	339.061	2092.78
HC04	Healthy	HC04_bin112	35	117745	31.09	50517.4	100	0	Archaea	Methanobacteriota	Methanobacteria	Methanobacteriales	Methanobacteriaceae	Methanobrevibacter_A	Methanobrevibacter_A smithii	412452	1768108	4015.13	2.27086	233.273	1470.87
HC04	Healthy	HC04_bin112	35	117745	31.09	50517.4	100	0	Archaea	Methanobacteriota	Methanobacteria	Methanobacteriales	Methanobacteriaceae	Methanobrevibacter_A	Methanobrevibacter_A smithii	412452	1768108	4015.13	2.27086	233.273	1470.87
HC10	Healthy	HC10_bin40	236	5141	31.5	6444.83	87.22	0	Archaea	Methanobacteriota	Methanobacteria	Methanobacteriales	Methanobacteriaceae	Methanobrevibacter_A	Methanobrevibacter_A smithii	67068	1520979	908.161	0.59709	44.0953	421.868
HC10	Healthy	HC10_bin40	236	5141	31.5	6444.83	87.22	0	Archaea	Methanobacteriota	Methanobacteria	Methanobacteriales	Methanobacteriaceae	Methanobrevibacter_A	Methanobrevibacter_A smithii	67068	1520979	908.161	0.59709	44.0953	421.868
HC11	Healthy	HC11_bin54	81	19651	30.43	22501.4	100	0.58	Archaea	Methanobacteriota	Methanobacteria	Methanobacteriales	Methanobacteriaceae	Methanobrevibacter_A	Methanobrevibacter_A smithii_A	111813	1822613	708.62	0.388794	61.3476	450.45
HC11	Healthy	HC11_bin54	81	19651	30.43	22501.4	100	0.58	Archaea	Methanobacteriota	Methanobacteria	Methanobacteriales	Methanobacteriaceae	Methanobrevibacter_A	Methanobrevibacter_A smithii_A	111813	1822613	708.62	0.388794	61.3476	450.45
LC08	Decompensated liver cirrhosis	LC08_bin121	71	114026	31.7	26487.6	100	0	Archaea	Methanobacteriota	Methanobacteria	Methanobacteriales	Methanobacteriaceae	Methanobrevibacter_A	Methanobrevibacter_A smithii	1709714	1880620	12919.7	6.8699	909.123	3595.91
LC08	Decompensated liver cirrhosis	LC08_bin121	71	114026	31.7	26487.6	100	0	Archaea	Methanobacteriota	Methanobacteria	Methanobacteriales	Methanobacteriaceae	Methanobrevibacter_A	Methanobrevibacter_A smithii	1709714	1880620	12919.7	6.8699	909.123	3595.91
LC11	Decompensated liver cirrhosis	LC11_bin34	34	152853	30.34	54597.5	100	0	Archaea	Methanobacteriota	Methanobacteria	Methanobacteriales	Methanobacteriaceae	Methanobrevibacter_A	Methanobrevibacter_A smithii_A	672798	1856314	9888.99	5.32722	362.438	2500.59
LC11	Decompensated liver cirrhosis	LC11_bin34	34	152853	30.34	54597.5	100	0	Archaea	Methanobacteriota	Methanobacteria	Methanobacteriales	Methanobacteriaceae	Methanobrevibacter_A	Methanobrevibacter_A smithii_A	672798	1856314	9888.99	5.32722	362.438	2500.59
LC13	Decompensated liver cirrhosis	LC13_bin42	24	387601	30.32	80371.5	100	0	Archaea	Methanobacteriota	Methanobacteria	Methanobacteriales	Methanobacteriaceae	Methanobrevibacter_A	Methanobrevibacter_A smithii_A	1021975	1928915	15612.3	8.0938	529.819	2745.27
LC13	Decompensated liver cirrhosis	LC13_bin42	24	387601	30.32	80371.5	100	0	Archaea	Methanobacteriota	Methanobacteria	Methanobacteriales	Methanobacteriaceae	Methanobrevibacter_A	Methanobrevibacter_A smithii_A	1021975	1928915	15612.3	8.0938	529.819	2745.27
CD01	rCDI	CD01_bin14	57	147201	31.2	60826.8	100	0	Bacteria	Bacillota_I	Bacilli_A	Erysipelotrichales	Coprobacillaceae	Thomasclavelia	Thomasclavelia ramosa	4307814	3467129	64399.4	18.5743	1242.47	11899.8
CD01	rCDI	CD01_bin18	73	141767	36.79	44195.7	100	0	Bacteria	Bacillota_I	Bacilli_A	Erysipelotrichales	Coprobacillaceae	Beduini	Beduini sp902363625	1355313	3226289	20261.2	6.28002	420.084	4023.38
CD01	rCDI	CD01_bin27	43	53672	38.89	49021.3	100	0	Bacteria	Bacillota_C	Negativicutes	Veillonellales	Veillonellaceae	Veillonella	Veillonella atypica	1074574	2107918	16064.3	7.62092	509.78	4882.44
CD01	rCDI	CD01_bin6	100	61063	43.43	43835.4	100	1.16	Bacteria	Bacillota_I	Bacilli_A	Erysipelotrichales	Erysipelotrichaceae	Clostridium_AQ	Clostridium_AQ innocuum	6012603	4383544	89885.1	20.5051	1371.63	13136.9
CD01	rCDI	CD01_bin17	55	466714	46.25	59702.4	99.42	0	Bacteria	Bacillota_A	Clostridia	Lachnospirales	Lachnospiraceae	Clostridium_AP	Clostridium_AP scindens	571465	3283631	8543.08	2.60172	174.034	1666.82
CD01	rCDI	CD01_bin10	103	31975	44.05	38601.4	99.42	0.23	Bacteria	Bacillota_A	Clostridia	Lachnospirales	Lachnospiraceae	Luxibacter	Luxibacter massiliensis	3468770	3975949	51856.2	13.0425	872.438	8355.82
CD01	rCDI	CD01_bin8	150	13534	59.59	27538.4	99.41	0	Bacteria	Desulfobacterota	Desulfovibrionia	Desulfovibrionales	Desulfovibrionaceae	Bilophila	Bilophila wadsworthia	611656	4130754	9143.92	2.21362	148.074	1418.18
CD01	rCDI	CD01_bin15	29	206461	49.33	116252	99.37	0	Bacteria	Bacillota_A	Clostridia	Lachnospirales	Lachnospiraceae	Cuneatibacter	Cuneatibacter caecimuris	798498	3371321	11937.1	3.54078	236.85	2268.44
CD01	rCDI	CD01_bin12	116	84423	54.43	31258.3	99.33	0	Bacteria	Bacillota_A	Clostridia	Oscillospirales	Butyricicoccaceae	Butyricicoccus	Butyricicoccus sp900547195	2029225	3625968	30335.8	8.36626	559.637	5359.95
CD01	rCDI	CD01_bin13	52	106521	61.6	68079.9	99.33	0.13	Bacteria	Bacillota_A	Clostridia	Oscillospirales	Oscillospiraceae	Flavonifractor	Flavonifractor plautii	846830	3540157	12659.6	3.57601	239.207	2291.02
CD01	rCDI	CD01_bin16	74	40304	57.74	44983	99.28	0	Bacteria	Bacteroidota	Bacteroidia	Bacteroidales	Rikenellaceae	Alistipes	Alistipes shahii	3788034	3328744	56629	17.0121	1137.98	10899
CD01	rCDI	CD01_bin24	35	401156	35.33	74337.4	99.28	1.27	Bacteria	Bacillota_C	Negativicutes	Selenomonadales	ICN-92133	Selenobaculum	Selenobaculum gbiensis	364342	2601810	5446.71	2.09343	140.034	1341.18
CD01	rCDI	CD01_bin3	69	187263	43.15	76561.2	99.26	0.19	Bacteria	Bacteroidota	Bacteroidia	Bacteroidales	Bacteroidaceae	Bacteroides	Bacteroides fragilis	2974159	5282724	44462	8.41649	562.997	5392.13
CD01	rCDI	CD01_bin4	134	74529	42.33	38340.7	99.25	1	Bacteria	Bacteroidota	Bacteroidia	Bacteroidales	Bacteroidaceae	Phocaeicola	Phocaeicola vulgatus	8782465	5137647	131293	25.5551	1709.43	16372.2
CD01	rCDI	CD01_bin21	95	78673	29.94	31355.7	99.06	0	Bacteria	Bacillota_I	Bacilli_A	Erysipelotrichales	Coprobacillaceae	Longibaculum	Longibaculum muris	694255	2978795	10378.7	3.4842	233.066	2232.2
CD01	rCDI	CD01_bin25	197	15160	26.71	13196.3	98.88	1.69	Bacteria	Fusobacteriota	Fusobacteriia	Fusobacteriales	Fusobacteriaceae	Fusobacterium	Fusobacterium animalis	734862	2599676	10985.8	4.22583	282.674	2707.33
CD01	rCDI	CD01_bin26	106	65777	61.97	23386.3	98.76	0.62	Bacteria	Pseudomonadota	Gammaproteobacteria	Burkholderiales	Burkholderiaceae	Sutterella	Sutterella wadsworthensis_A	1184941	2478945	17714.2	7.14586	478.002	4578.09
CD01	rCDI	CD01_bin2	59	248248	45.99	100299	98.73	0.84	Bacteria	Bacillota_A	Clostridia	Lachnospirales	Lachnospiraceae	Blautia	Blautia coccoides	8906001	5917640	133140	22.4988	1504.99	14414.1
CD01	rCDI	CD01_bin19	53	158243	56.65	59038	97.96	0.68	Bacteria	Verrucomicrobiota	Verrucomicrobiae	Verrucomicrobiales	Akkermansiaceae	Akkermansia	Akkermansia biwaensis	5874310	3129015	87817.6	28.0656	1877.37	17980.6
CD01	rCDI	CD01_bin1	144	46498	52.55	49851	96.89	0.78	Bacteria	Bacillota	Bacilli	Paenibacillales	Paenibacillaceae	Paenibacillus_A	Paenibacillus_A macerans	287063	7178549	4291.43	0.597813	39.989	382.997
CD01	rCDI	CD01_bin9	50	486020	38.43	82152.9	95.97	1.34	Bacteria	Bacillota_A	Clostridia	Lachnospirales	UBA5962	Anaeropeptidivorans	Unclassified_Anaeropeptidivorans	328383	4107643	4909.14	1.19512	79.9444	765.671
CD01	rCDI	CD01_bin28	46	36291	45.56	38155.7	95.57	0.63	Bacteria	Bacillota_C	Negativicutes	Veillonellales	Dialisteraceae	Dialister	Dialister invisus	75828	1755164	1133.59	0.645858	43.2028	413.777
CD01	rCDI	CD01_bin11	185	18298	34.24	19866.6	95.13	4.03	Bacteria	Bacillota_A	Clostridia	Lachnospirales	Cellulosilyticaceae	Cellulosilyticum	Cellulosilyticum lentocellum	141195	3675327	2110.79	0.574313	38.417	367.941
CD01	rCDI	CD01_bin5	347	10081	34.98	13365.7	94.85	4.5	Bacteria	Bacillota_A	Clostridia	Lachnospirales	Lachnospiraceae	Anaerosporobacter	Anaerosporobacter mobilis	132565	4637890	1981.77	0.4273	28.583	273.755
CD01	rCDI	CD01_bin7	82	185184	50.58	51064.1	83.67	0.43	Bacteria	Pseudomonadota	Gammaproteobacteria	Enterobacterales	Enterobacteriaceae	Escherichia	Escherichia coli	572545	4187257	8559.23	2.04411	136.735	1309.59
CD01	rCDI	CD01_bin22	758	1076	28.83	3842.99	81.09	3.1	Bacteria	Bacillota_A	Clostridia	Clostridiales	Clostridiaceae	Clostridium	Clostridium butyricum	93739	2912983	1401.35	0.481069	32.1797	308.203
CD01	rCDI	CD01_bin20	45	295877	58.64	66960.7	77.42	0.81	Bacteria	Actinomycetota	Coriobacteriia	Coriobacteriales	Eggerthellaceae	Raoultibacter	Raoultibacter massiliensis	443883	3013232	6635.8	2.20222	147.311	1410.88
CD01	rCDI	CD01_bin29	815	1469	49.17	2079.1	73.83	2.9	Bacteria	Pseudomonadota	Gammaproteobacteria	Burkholderiales	Burkholderiaceae	Parasutterella	Parasutterella excrementihominis	26231	1694469	392.139	0.231423	15.4804	148.264
CD02	rCDI	CD02_bin11	18	464889	38.6	117692	100	0	Bacteria	Bacillota_C	Negativicutes	Veillonellales	Veillonellaceae	Veillonella	Veillonella sp018376995	1337638	2118463	28175.2	13.2998	631.419	3252.76
CD02	rCDI	CD02_bin8	48	406202	50.89	80862.1	100	0.03	Bacteria	Pseudomonadota	Gammaproteobacteria	Enterobacterales	Enterobacteriaceae	Morganella	Morganella morganii	3463073	3881382	72944.1	18.7933	892.227	4596.31
CD02	rCDI	CD02_bin9	262	1413	67.91	12129.1	100	1.54	Bacteria	Actinomycetota	Actinomycetes	Actinomycetales	Actinomycetaceae	Actinomyces	Actinomyces naeslundii	109116	3177826	2298.35	0.723247	34.3367	176.886
CD02	rCDI	CD02_bin4	71	199102	58.46	69785.4	99.68	0.22	Bacteria	Pseudomonadota	Gammaproteobacteria	Pseudomonadales	Pseudomonadaceae	Pseudomonas_E	Pseudomonas_E bubulae	1381935	4954760	29108.3	5.87481	278.911	1436.81
CD02	rCDI	CD02_bin1	62	179313	42.23	112971	99.26	0.56	Bacteria	Bacteroidota	Bacteroidia	Bacteroidales	Bacteroidaceae	Bacteroides	Bacteroides ovatus	1881135	7004197	39623.1	5.65705	268.573	1383.55
CD02	rCDI	CD02_bin3	66	129468	55.07	86935.7	98.24	2.41	Bacteria	Pseudomonadota	Gammaproteobacteria	Enterobacterales	Enterobacteriaceae	Klebsiella	Klebsiella oxytoca	9304433	5737755	195983	34.1567	1621.62	8353.77
CD02	rCDI	CD02_bin2	245	78397	48.24	26981	98.1	0.95	Bacteria	Bacillota_A	Clostridia	Lachnospirales	Lachnospiraceae	Enterocloster	Enterocloster clostridioformis	7190695	6610345	151461	22.9126	1087.79	5603.78
CD02	rCDI	CD02_bin6	34	118537	40.34	123598	97.3	2.22	Bacteria	Pseudomonadota	Gammaproteobacteria	Enterobacterales	Enterobacteriaceae	Providencia	Providencia rettgeri	7775125	4202319	163771	38.9715	1850.2	9531.31
CD02	rCDI	CD02_bin16	29	318287	45.47	56097.9	97.01	0	Bacteria	Bacillota_C	Negativicutes	Veillonellales	Megasphaeraceae	Anaeroglobus	Anaeroglobus micronuciformis	294282	1626838	6198.58	3.8102	180.892	931.867
CD02	rCDI	CD02_bin15	112	310081	45.37	16234.9	96.39	2.53	Bacteria	Bacillota_C	Negativicutes	Veillonellales	Dialisteraceae	Dialister	Dialister invisus	85174	1818310	1794.05	0.98666	46.8424	241.309
CD02	rCDI	CD02_bin5	71	73791	51.52	59470.7	81.37	0.76	Bacteria	Pseudomonadota	Gammaproteobacteria	Enterobacterales	Enterobacteriaceae	Citrobacter	Citrobacter freundii	1658356	4222417	34930.6	8.27266	392.75	2023.26
CD02	rCDI	CD02_bin12	599	1138	45.4	3425.68	76.67	1.57	Bacteria	Bacillota_A	Clostridia	Lachnospirales	Anaerotignaceae	Anaerotignum	Anaerotignum lactatifermentans	50078	2051983	1054.81	0.514046	24.4047	125.721
CD03	rCDI	CD03_bin41	48	3908	60.34	40321.6	100	0	Bacteria	Actinomycetota	Actinomycetes	Actinomycetales	Bifidobacteriaceae	Bifidobacterium	Bifidobacterium animalis_B	176458	1935436	2792.92	1.44304	91.1722	739.41
CD03	rCDI	CD03_bin46	38	103473	45.47	45165.3	100	0	Bacteria	Bacillota_C	Negativicutes	Veillonellales	Megasphaeraceae	Anaeroglobus	Anaeroglobus micronuciformis	240445	1716282	3805.69	2.2174	140.096	1136.19
CD03	rCDI	CD03_bin34	37	302047	38.92	56760	100	0.68	Bacteria	Bacillota_C	Negativicutes	Veillonellales	Veillonellaceae	Veillonella	Veillonella atypica	2413853	2100119	38205.7	18.1922	1149.39	9321.59
CD03	rCDI	CD03_bin32	30	507963	44.11	70950.3	99.51	0.12	Bacteria	Campylobacterota	Campylobacteria	Campylobacterales	Campylobacteraceae	Campylobacter_A	Campylobacter_A curvus	206819	2128508	3273.46	1.53792	97.1662	788.022
CD03	rCDI	CD03_bin7	86	280961	61.25	39825	99.41	0	Bacteria	Desulfobacterota	Desulfovibrionia	Desulfovibrionales	Desulfovibrionaceae	Desulfovibrio	Desulfovibrio fairfieldensis	3339245	3424951	52852.5	15.4316	974.976	7907.09
CD03	rCDI	CD03_bin9	64	317443	44.5	52210.8	99.07	3.81	Bacteria	Bacillota	Bacilli	Lactobacillales	Lactobacillaceae	Lactiplantibacillus	Lactiplantibacillus plantarum	669785	3341491	10601.1	3.17258	200.445	1625.62
CD03	rCDI	CD03_bin23	210	71028	35.04	11058.9	99.06	1.58	Bacteria	Bacillota	Bacilli	Lactobacillales	Streptococcaceae	Lactococcus	Lactococcus lactis	79893	2322369	1264.52	0.544496	34.4015	278.998
CD03	rCDI	CD03_bin17	149	32542	39.59	17596.1	98.99	0.34	Bacteria	Bacteroidota	Bacteroidia	Bacteroidales	Bacteroidaceae	Prevotella	Prevotella disiens	157412	2621818	2491.47	0.950282	60.0393	486.921
CD03	rCDI	CD03_bin25	72	49569	26.95	31849.8	98.88	4.54	Bacteria	Fusobacteriota	Fusobacteriia	Fusobacteriales	Fusobacteriaceae	Fusobacterium	Fusobacterium animalis	1559510	2293183	24683.4	10.7638	680.063	5515.34
CD03	rCDI	CD03_bin28	39	249952	49.37	57465.2	98.14	0.62	Bacteria	Pseudomonadota	Gammaproteobacteria	Burkholderiales	Burkholderiaceae	Sutterella	Sutterella sp900762445	486301	2241144	7697.02	3.43441	216.988	1759.78
CD03	rCDI	CD03_bin35	117	7776	46.43	17863.7	98.1	2.06	Bacteria	Bacillota_C	Negativicutes	Veillonellales	Dialisteraceae	Dialister	Dialister invisus	116895	2090056	1850.18	0.885228	55.9291	453.587
CD03	rCDI	CD03_bin26	120	55741	56.6	19014.4	97.66	1.71	Bacteria	Bacillota_C	Negativicutes	Selenomonadales	Selenomonadaceae	Centipeda	Centipeda sp015265235	172334	2281724	2727.65	1.19543	75.528	612.535
CD03	rCDI	CD03_bin11	70	132406	49.76	44699.5	95.97	0	Bacteria	Bacillota_A	Clostridia	Christensenellales	Borkfalkiaceae	Scatosoma	Scatosoma sp003150575	480755	3128965	7609.24	2.43187	153.647	1246.08
CD03	rCDI	CD03_bin15	347	29412	42.76	7787.59	93.33	0.77	Bacteria	Bacteroidota	Bacteroidia	Bacteroidales	Bacteroidaceae	Prevotella	Prevotella timonensis	80255	2702295	1270.25	0.470064	29.6988	240.859
CD03	rCDI	CD03_bin49	400	15876	42.37	4202.93	92.37	3.75	Bacteria	Bacillota_C	Negativicutes	Veillonellales	Dialisteraceae	Dialister	Dialister sp900541485	42802	1681170	677.456	0.402967	25.4597	206.479
CD03	rCDI	CD03_bin37	485	2395	47.72	4295.71	90.17	2.13	Bacteria	Bacteroidota	Bacteroidia	Bacteroidales	Bacteroidaceae	Prevotella	Prevotella colorans	45418	2083421	718.861	0.345039	21.7997	176.797
CD03	rCDI	CD03_bin27	42	263858	58.14	53730.1	89.32	2.05	Bacteria	Actinomycetota	Actinomycetes	Actinomycetales	Bifidobacteriaceae	Bifidobacterium	Bifidobacterium dentium	167903	2256662	2657.51	1.17763	74.4033	603.413
CD03	rCDI	CD03_bin36	198	6386	39.49	10543.9	88.71	4.64	Bacteria	Bacillota	Bacilli	Lactobacillales	Streptococcaceae	Streptococcus	Streptococcus salivarius_D	158430	2087696	2507.58	1.20112	75.8875	615.451
CD03	rCDI	CD03_bin4	134	257733	53.69	31465.2	82.05	4.1	Bacteria	Pseudomonadota	Gammaproteobacteria	Enterobacterales	Enterobacteriaceae	Kluyvera	Kluyvera cryocrescens	773736	4216341	12246.4	2.90452	183.509	1488.26
CD03	rCDI	CD03_bin38	239	6868	26.7	8414.38	80.55	0.56	Bacteria	Fusobacteriota	Fusobacteriia	Fusobacteriales	Fusobacteriaceae	Fusobacterium	Fusobacterium polymorphum	110126	2011037	1743.04	0.866736	54.7608	444.112
CD03	rCDI	CD03_bin39	272	13136	38.57	7330.9	74.31	0	Bacteria	Bacillota_C	Negativicutes	Veillonellales	Veillonellaceae	Veillonella	Veillonella nakazawae	89258	1994005	1412.75	0.708497	44.7632	363.031
CD04	rCDI	CD04_bin15	30	40257	38.63	71769.6	100	0.6	Bacteria	Bacillota_C	Negativicutes	Veillonellales	Veillonellaceae	Veillonella	Veillonella nakazawae	3605842	2153087	78507.3	36.4627	1674.73	5083.24
CD04	rCDI	CD04_bin6	53	116150	40.5	60498.5	99.25	1.51	Bacteria	Bacillota	Bacilli	Lactobacillales	Enterococcaceae	Enterococcus_D	Enterococcus_D gallinarum	139067	3206421	3027.8	0.944294	43.3714	131.643
CD04	rCDI	CD04_bin11	201	8696	67.38	13077.4	98.79	0.66	Bacteria	Actinomycetota	Actinomycetes	Propionibacteriales	Propionibacteriaceae	Propionibacterium	Propionibacterium freudenreichii	105893	2628562	2305.53	0.877107	40.2855	122.277
CD04	rCDI	CD04_bin16	26	123202	42.19	74282.2	98.77	2.16	Bacteria	Bacillota	Bacilli	Lactobacillales	Lactobacillaceae	Pediococcus	Pediococcus acidilactici	3748850	1931338	81620.9	42.2613	1941.06	5891.63
CD04	rCDI	CD04_bin10	151	21982	56.36	17559.8	98.75	1.25	Bacteria	Pseudomonadota	Gammaproteobacteria	Burkholderiales	Burkholderiaceae	Duodenibacillus	Duodenibacillus sp900544255	3898490	2651527	84878.9	32.0113	1470.28	4462.68
CD04	rCDI	CD04_bin12	115	156942	34.82	20963.3	98.49	1.23	Bacteria	Bacillota	Bacilli	Lactobacillales	Streptococcaceae	Lactococcus	Lactococcus lactis	581628	2410782	12663.4	5.2528	241.261	732.29
CD04	rCDI	CD04_bin13	196	109931	62.04	12022.1	97.79	1.27	Bacteria	Actinomycetota	Actinomycetes	Actinomycetales	Micrococcaceae	Rothia	Rothia mucilaginosa_A	94667	2356324	2061.11	0.874716	40.1757	121.944
CD04	rCDI	CD04_bin9	241	4831	46.88	11470.9	96.79	4.89	Bacteria	Bacillota	Bacilli	Lactobacillales	Lactobacillaceae	Lacticaseibacillus	Lacticaseibacillus rhamnosus	2464978	2764481	53668.1	19.4135	891.66	2706.42
CD04	rCDI	CD04_bin7	59	255112	44.58	53405	94.44	2.78	Bacteria	Bacillota	Bacilli	Lactobacillales	Lactobacillaceae	Lactiplantibacillus	Lactiplantibacillus plantarum	2899203	3150893	63122.2	20.0331	920.121	2792.81
CD04	rCDI	CD04_bin3	193	12966	57.88	23298.9	83.86	3.45	Bacteria	Pseudomonadota	Gammaproteobacteria	Enterobacterales	Enterobacteriaceae	Klebsiella	Klebsiella pneumoniae	4949280	4496685	107757	23.9637	1100.65	3340.76
CD04	rCDI	CD04_bin14	694	4595	46.81	3192.34	81.49	1.39	Bacteria	Bacillota	Bacilli	Lactobacillales	Lactobacillaceae	Lacticaseibacillus	Lacticaseibacillus paracasei	47868	2215481	1042.19	0.470415	21.6061	65.5802
CD04	rCDI	CD04_bin4	120	101209	50.75	31398	74	3.96	Bacteria	Pseudomonadota	Gammaproteobacteria	Enterobacterales	Enterobacteriaceae	Escherichia	Escherichia coli	5111616	3767764	111291	29.5378	1356.67	4117.85
CD05	rCDI	CD05_bin17	38	235216	26.85	57052	100	0	Bacteria	Fusobacteriota	Fusobacteriia	Fusobacteriales	Fusobacteriaceae	Fusobacterium	Fusobacterium animalis	1794612	2167977	35011.1	16.1492	827.782	4207.12
CD05	rCDI	CD05_bin6	126	89443	56.85	30517.7	100	1.92	Bacteria	Bacteroidota	Bacteroidia	Bacteroidales	Rikenellaceae	Alistipes	Alistipes finegoldii	5219895	3845224	101835	26.4835	1357.5	6899.36
CD05	rCDI	CD05_bin10	64	94959	46.2	46118.6	99.46	0.02	Bacteria	Bacillota	Bacilli	Lactobacillales	Lactobacillaceae	Lacticaseibacillus	Lacticaseibacillus paracasei	188947	2951587	3686.17	1.24888	64.0154	325.352
CD05	rCDI	CD05_bin8	94	69379	46.39	37817.7	99.38	4.12	Bacteria	Bacillota	Bacilli	Lactobacillales	Lactobacillaceae	Lactiplantibacillus	Lactiplantibacillus pentosus	1504101	3554861	29343.5	8.25447	423.111	2150.42
CD05	rCDI	CD05_bin21	28	81510	41.35	65461.9	99.3	1.05	Bacteria	Bacillota	Bacilli	Lactobacillales	Lactobacillaceae	Ligilactobacillus	Ligilactobacillus animalis	2714525	1832933	52957.7	28.8923	1480.97	7526.9
CD05	rCDI	CD05_bin13	25	49950	35.37	103853	99.28	1.27	Bacteria	Bacillota_C	Negativicutes	Selenomonadales	ICN-92133	Selenobaculum	Selenobaculum gbiensis	474721	2596332	9261.33	3.56708	182.843	929.281
CD05	rCDI	CD05_bin22	211	12598	45.57	8573.43	98.1	1.27	Bacteria	Bacillota_C	Negativicutes	Veillonellales	Dialisteraceae	Dialister	Dialister invisus	51811	1808993	1010.78	0.558753	28.6408	145.564
CD05	rCDI	CD05_bin18	66	215439	38.67	31286.8	97.82	1.55	Bacteria	Bacillota_C	Negativicutes	Veillonellales	Veillonellaceae	Veillonella	Veillonella atypica	237443	2064930	4632.28	2.24331	114.988	584.417
CD05	rCDI	CD05_bin14	68	210790	56.92	34677.6	96.03	0.08	Bacteria	Bacillota_C	Negativicutes	Selenomonadales	Selenomonadaceae	Centipeda	Centipeda felix	587137	2358078	11454.5	4.85754	248.99	1265.47
CD05	rCDI	CD05_bin5	124	65287	59.23	34366.6	95.86	0	Bacteria	Desulfobacterota	Desulfovibrionia	Desulfovibrionales	Desulfovibrionaceae	Bilophila	Bilophila wadsworthia	1525112	4261462	29753.4	6.98197	357.885	1818.91
CD05	rCDI	CD05_bin11	43	93050	46.69	66024.9	95.62	0	Bacteria	Bacillota	Bacilli	Lactobacillales	Lactobacillaceae	Lacticaseibacillus	Lacticaseibacillus rhamnosus	149875	2839069	2923.91	1.02988	52.7902	268.301
CD05	rCDI	CD05_bin9	29	198346	51.38	120125	95.61	1.63	Bacteria	Pseudomonadota	Gammaproteobacteria	Enterobacterales	Enterobacteriaceae	Morganella	Morganella morganii	1006515	3483636	19636.1	5.63667	288.927	1468.44
CD05	rCDI	CD05_bin19	38	12967	39.29	53515.7	95.21	4.26	Bacteria	Bacillota_C	Negativicutes	Veillonellales	Veillonellaceae	Veillonella	Veillonella parvula_A	2713519	2033598	52938	26.0317	1334.34	6781.67
CD05	rCDI	CD05_bin24	179	45006	39.13	8881.67	87.61	1.87	Bacteria	Bacillota	Bacilli	Lactobacillales	Streptococcaceae	Streptococcus	Streptococcus thermophilus	91331	1589819	1781.78	1.12074	57.4474	291.971
CD05	rCDI	CD05_bin12	572	7733	44.91	4913.33	81.31	2.92	Bacteria	Bacillota	Bacilli	Lactobacillales	Lactobacillaceae	Lactiplantibacillus	Lactiplantibacillus plantarum	73651	2810427	1436.86	0.511259	26.2063	133.191
CD05	rCDI	CD05_bin3	183	147226	57.12	26034.8	74.14	1.72	Bacteria	Pseudomonadota	Gammaproteobacteria	Enterobacterales	Enterobacteriaceae	Klebsiella	Klebsiella quasipneumoniae	2890651	4764360	56393.7	11.8366	606.724	3083.61
CD06	rCDI	CD06_bin13	42	36642	45.54	40734.8	100	0	Bacteria	Bacillota_C	Negativicutes	Veillonellales	Megasphaeraceae	Anaeroglobus	Anaeroglobus micronuciformis	181419	1710860	7113.1	4.15762	106.04	2581.53
CD06	rCDI	CD06_bin8	68	31487	26.72	36815	100	0	Bacteria	Fusobacteriota	Fusobacteriia	Fusobacteriales	Fusobacteriaceae	Fusobacterium	Fusobacterium animalis	209911	2503423	8230.22	3.28759	83.8496	2041.31
CD06	rCDI	CD06_bin3	94	77244	30.35	36957.5	100	3.37	Bacteria	Fusobacteriota	Fusobacteriia	Fusobacteriales	Fusobacteriaceae	Fusobacterium_A	Fusobacterium_A ulcerans	4243524	3474009	166381	47.893	1221.51	29737.5
CD06	rCDI	CD06_bin1	60	164815	55.95	95885	99.85	0.99	Bacteria	Pseudomonadota	Gammaproteobacteria	Enterobacterales	Enterobacteriaceae	Klebsiella	Klebsiella michiganensis	742598	5753100	29115.9	5.0609	129.078	3142.39
CD06	rCDI	CD06_bin12	48	43794	41.2	39004.1	99.3	2.96	Bacteria	Bacillota	Bacilli	Lactobacillales	Lactobacillaceae	Ligilactobacillus	Ligilactobacillus animalis	236433	1872195	9270.09	4.95146	126.287	3074.44
CD06	rCDI	CD06_bin14	25	271526	29.37	65856.9	97.75	0	Bacteria	Bacillota_I	Bacilli_A	RFN20	CAG-288	CAG-345	CAG-345 sp000433315	2326576	1646422	91220.7	55.4054	1413.11	34402.1
CD06	rCDI	CD06_bin11	218	4851	56.13	9468.3	97.71	1.02	Bacteria	Bacillota_C	Negativicutes	Selenomonadales	Selenomonadaceae	Centipeda	Centipeda flueggei	62568	2064090	2453.17	1.1885	30.3126	737.959
CD06	rCDI	CD06_bin5	111	96196	46.72	26095.4	97.64	2.15	Bacteria	Bacillota	Bacilli	Lactobacillales	Lactobacillaceae	Lacticaseibacillus	Lacticaseibacillus rhamnosus	113497	2896594	4450	1.53629	39.1829	953.906
CD06	rCDI	CD06_bin2	191	101445	59.35	22529.8	97.63	0	Bacteria	Desulfobacterota	Desulfovibrionia	Desulfovibrionales	Desulfovibrionaceae	Bilophila	Bilophila wadsworthia	835368	4303190	32753.2	7.61138	194.128	4726.03
CD06	rCDI	CD06_bin6	116	66093	48.59	22255.1	97.5	0.73	Bacteria	Pseudomonadota	Gammaproteobacteria	Burkholderiales	Burkholderiaceae	Parasutterella	Parasutterella excrementihominis	2838925	2581596	111309	43.1163	1099.68	26771.6
CD06	rCDI	CD06_bin10	83	261440	38.54	25036.3	97.01	0.29	Bacteria	Bacillota_C	Negativicutes	Veillonellales	Veillonellaceae	Veillonella	Veillonella nakazawae	172186	2078010	6751.09	3.24882	82.861	2017.25
CD06	rCDI	CD06_bin4	411	21513	47.02	7815.47	95.47	3.57	Bacteria	Bacillota	Bacilli	Lactobacillales	Lactobacillaceae	Lactiplantibacillus	Lactiplantibacillus pentosus	243900	3212160	9562.86	2.97708	75.9302	1848.52
CD06	rCDI	CD06_bin7	42	45216	51.63	60173.9	94.76	0.83	Bacteria	Bacillota_A	Clostridia	Christensenellales	Borkfalkiaceae	Borkfalkia	Borkfalkia ceftriaxoniphila	4984504	2527304	195433	77.3287	1972.26	48014.6
CD06	rCDI	CD06_bin16	346	3126	39.54	4355.54	89.86	4.85	Bacteria	Bacillota	Bacilli	Lactobacillales	Streptococcaceae	Streptococcus	Streptococcus thermophilus	57975	1507016	2273.09	1.50834	38.4701	936.552
CD06	rCDI	CD06_bin15	467	2944	39.38	3306.1	84.35	3.25	Bacteria	Bacillota_C	Negativicutes	Veillonellales	Veillonellaceae	Veillonella	Veillonella atypica	43120	1543948	1690.65	1.09502	27.9284	679.916
CD07	rCDI	CD07_bin17	29	195122	45.47	59637.7	100	0	Bacteria	Bacillota_C	Negativicutes	Veillonellales	Megasphaeraceae	Anaeroglobus	Anaeroglobus micronuciformis	118013	1729494	3020.76	1.74661	68.2356	90.9909
CD07	rCDI	CD07_bin5	78	24479	35.87	39222.1	100	0.94	Bacteria	Bacillota_I	Bacilli_A	Erysipelotrichales	Coprobacillaceae	Beduini	Beduini sp902363625	1785408	3059320	45700.7	14.9382	583.596	778.215
CD07	rCDI	CD07_bin12	89	412936	38.85	24257.6	100	3.35	Bacteria	Bacillota_C	Negativicutes	Veillonellales	Veillonellaceae	Veillonella	Veillonella sp902466275	1986425	2158930	50846.1	23.5515	920.097	1226.93
CD07	rCDI	CD07_bin10	144	65490	26.98	17750.4	100	3.71	Bacteria	Fusobacteriota	Fusobacteriia	Fusobacteriales	Fusobacteriaceae	Fusobacterium	Fusobacterium animalis	2083568	2556055	53332.7	20.8652	815.15	1086.99
CD07	rCDI	CD07_bin6	109	160783	46.27	27345	99.46	0.95	Bacteria	Bacillota	Bacilli	Lactobacillales	Lactobacillaceae	Lacticaseibacillus	Lacticaseibacillus paracasei	2793107	2980604	71494.6	23.9866	937.094	1249.6
CD07	rCDI	CD07_bin7	47	18176	46.68	62170.9	99.39	0.02	Bacteria	Bacillota	Bacilli	Lactobacillales	Lactobacillaceae	Lacticaseibacillus	Lacticaseibacillus rhamnosus	191221	2922031	4894.65	1.67508	65.4411	87.2646
CD07	rCDI	CD07_bin8	28	269118	35.32	93116.5	99.28	1.35	Bacteria	Bacillota_C	Negativicutes	Selenomonadales	ICN-92133	Selenobaculum	Selenobaculum gbiensis	433877	2607262	11105.9	4.25959	166.411	221.906
CD07	rCDI	CD07_bin4	106	26113	44.2	31647.7	99.07	3.45	Bacteria	Bacillota	Bacilli	Lactobacillales	Lactobacillaceae	Lactiplantibacillus	Lactiplantibacillus plantarum	208831	3354651	5345.41	1.59343	62.2512	83.0108
CD07	rCDI	CD07_bin13	20	251318	49.44	107072	98.14	0.62	Bacteria	Pseudomonadota	Gammaproteobacteria	Burkholderiales	Burkholderiaceae	Sutterella	Sutterella sp900762445	206431	2141432	5283.97	2.4675	96.3986	128.546
CD07	rCDI	CD07_bin16	49	40922	45.04	38024.3	98.1	0.95	Bacteria	Bacillota_C	Negativicutes	Veillonellales	Dialisteraceae	Dialister	Dialister invisus	206403	1863192	5283.26	2.83559	110.779	147.722
CD07	rCDI	CD07_bin11	512	12254	37.19	4966.05	94.29	1.62	Bacteria	Bacillota_C	Negativicutes	Selenomonadales	Unclassified_Selenomonadales	Unclassified_Selenomonadales	Unclassified_Selenomonadales	64308	2542619	1646.08	0.647395	25.292	33.7265
CD07	rCDI	CD07_bin15	555	1234	35.27	3437.89	83.31	1.95	Bacteria	Bacillota	Bacilli	Lactobacillales	Streptococcaceae	Lactococcus	Lactococcus lactis	43767	1908029	1120.3	0.587148	22.9383	30.5879
CD07	rCDI	CD07_bin18	5	216285	42.1	291584	82.92	0.77	Bacteria	Bacillota	Bacilli	Lactobacillales	Lactobacillaceae	Pediococcus	Pediococcus acidilactici	479911	1457918	12284.2	8.42584	329.176	438.95
CD08	rCDI	CD08_bin27	199	81803	38.53	11814.7	99.98	4.14	Bacteria	Bacillota_C	Negativicutes	Veillonellales	Veillonellaceae	Veillonella	Veillonella nakazawae	111948	2351130	1536.62	0.653566	47.6146	259.438
CD08	rCDI	CD08_bin8	469	19784	55.04	6913.4	99.32	2.38	Bacteria	Bacillota_A	Clostridia	Oscillospirales	Ruminococcaceae	Gemmiger	Gemmiger qucibialis	347542	3242384	4770.42	1.47127	107.187	584.032
CD08	rCDI	CD08_bin39	35	275390	52.92	54735.6	99.19	0.81	Bacteria	Actinomycetota	Coriobacteriia	Coriobacteriales	Eggerthellaceae	Anaerotardibacter	Anaerotardibacter sp000436075	121166	1915746	1663.15	0.868145	63.2474	344.617
CD08	rCDI	CD08_bin14	110	168390	46.35	27340.6	99.18	2.59	Bacteria	Bacillota	Bacilli	Lactobacillales	Lactobacillaceae	Lacticaseibacillus	Lacticaseibacillus paracasei	210932	3007468	2895.29	0.9627	70.1361	382.151
CD08	rCDI	CD08_bin30	81	167929	38.39	26814.7	98.66	4.36	Bacteria	Bacillota_A	Clostridia	Oscillospirales	Acutalibacteraceae	Eubacterium_R	Eubacterium_R sp000436835	220550	2171992	3027.31	1.39379	101.543	553.277
CD08	rCDI	CD08_bin6	189	102005	36.79	18735.4	97.99	2.24	Bacteria	Bacillota_A	Clostridia	Lachnospirales	Lachnospiraceae	Butyribacter	Butyribacter intestini	251859	3540988	3457.06	0.976299	71.1268	387.549
CD08	rCDI	CD08_bin21	105	1434	37.74	24036	95.97	2.06	Bacteria	Bacillota_A	Clostridia	Lachnospirales	Lachnospiraceae	Lachnospira	Lachnospira eligens_A	408234	2523777	5603.49	2.22028	161.755	881.357
CD08	rCDI	CD08_bin24	127	98324	59.62	18594.8	94.01	2.38	Bacteria	Actinomycetota	Actinomycetes	Actinomycetales	Bifidobacteriaceae	Bifidobacterium	Bifidobacterium longum	278435	2361542	3821.85	1.61837	117.904	642.424
CD08	rCDI	CD08_bin5	419	10357	50.12	8769.2	91.68	2.46	Bacteria	Bacillota_I	Bacilli_A	Erysipelotrichales	Erysipelotrichaceae	Holdemania	Holdemania filiformis	115666	3674293	1587.65	0.432097	31.4798	171.524
CD08	rCDI	CD08_bin37	86	78909	58.78	22904.5	87.1	1.34	Bacteria	Actinomycetota	Coriobacteriia	Coriobacteriales	Coriobacteriaceae	Collinsella	Collinsella sp900542825	1904248	1969790	26138	13.2695	966.726	5267.41
CD08	rCDI	CD08_bin29	403	4421	50.38	5517.42	80.54	2.1	Bacteria	Bacillota_A	Clostridia	Oscillospirales	Acutalibacteraceae	Solibaculum	Solibaculum mannosilyticum	61367	2223521	842.334	0.378829	27.599	150.379
CD08	rCDI	CD08_bin22	255	5919	41.86	9839.67	74.34	0.95	Bacteria	Bacillota_A	Clostridia	Lachnospirales	Lachnospiraceae	Blautia_A	Blautia_A wexlerae	1846831	2509116	25349.9	10.1031	736.048	4010.51
CD08	rCDI	CD08_bin41	119	5211	35.48	15170.3	72.82	2.24	Bacteria	Bacillota_A	Clostridia	Lachnospirales	Lachnospiraceae	Eubacterium_G	Eubacterium_G sp000434315	243505	1805266	3342.39	1.85147	134.886	734.954
CD08	rCDI	CD08_bin28	787	1178	45.21	2958.49	72.31	2.29	Bacteria	Bacillota_A	Clostridia	Oscillospirales	Ruminococcaceae	Ruminiclostridium_E	Ruminiclostridium_E siraeum	55910	2328335	767.431	0.329605	24.0129	130.839
CD09	rCDI	CD09_bin12	23	64183	45.28	76907.4	100	0	Bacteria	Bacillota_C	Negativicutes	Veillonellales	Megasphaeraceae	Anaeroglobus	Anaeroglobus micronuciformis	513945	1768870	15367.3	8.68765	290.55	2706.8
CD09	rCDI	CD09_bin4	189	1246	59.41	22090.8	100	0	Bacteria	Desulfobacterota	Desulfovibrionia	Desulfovibrionales	Desulfovibrionaceae	Bilophila	Bilophila wadsworthia	589896	4175156	17638.3	4.22459	141.287	1316.25
CD09	rCDI	CD09_bin7	221	92673	26.84	11359.6	100	0	Bacteria	Fusobacteriota	Fusobacteriia	Fusobacteriales	Fusobacteriaceae	Fusobacterium	Fusobacterium animalis	100564	2510464	3006.94	1.19776	40.0579	373.184
CD09	rCDI	CD09_bin9	39	380901	38.95	54882.3	100	0	Bacteria	Bacillota_C	Negativicutes	Veillonellales	Veillonellaceae	Veillonella	Veillonella atypica	569243	2140410	17020.8	7.95211	265.95	2477.62
CD09	rCDI	CD09_bin6	214	3797	34.78	12627.9	99.62	1.6	Bacteria	Bacillota	Bacilli	Lactobacillales	Streptococcaceae	Lactococcus	Lactococcus lactis	221019	2702379	6608.63	2.44548	81.7868	761.935
CD09	rCDI	CD09_bin10	48	117428	49.62	43618.8	94.61	0	Bacteria	Bacillota_C	Negativicutes	Acidaminococcales	Acidaminococcaceae	Acidaminococcus	Acidaminococcus intestini	213567	2093703	6385.81	3.05001	102.004	950.285
CD09	rCDI	CD09_bin3	105	121380	53.09	45295.9	80.99	4.31	Bacteria	Pseudomonadota	Gammaproteobacteria	Enterobacterales	Enterobacteriaceae	Citrobacter_A	Citrobacter_A farmeri	416969	4756075	12467.7	2.62142	87.6708	816.751
CD09	rCDI	CD09_bin11	750	2603	65.35	2384.36	71.23	4.28	Bacteria	Actinomycetota	Actinomycetes	Actinomycetales	Actinomycetaceae	Pauljensenia	Pauljensenia variabilis	37166	1788272	1111.29	0.621432	20.7832	193.619
CD10	rCDI	CD10_bin18	37	68118	28.75	83935.6	100	1.06	Bacteria	Bacillota_A	Clostridia	Peptostreptococcales	Peptostreptococcaceae	Intestinibacter	Intestinibacter bartlettii	694845	3105619	9223.05	2.96979	223.738	1522.49
CD10	rCDI	CD10_bin15	130	26633	55.88	24843	100	1.69	Bacteria	Synergistota	Synergistia	Synergistales	Synergistaceae	Cloacibacillus	Cloacibacillus evryensis	721550	3229585	9577.52	2.96556	223.419	1520.31
CD10	rCDI	CD10_bin34	57	130513	38.77	38597.9	99.4	0.26	Bacteria	Bacillota_C	Negativicutes	Veillonellales	Veillonellaceae	Veillonella	Veillonella atypica	1509265	2200078	20033.3	9.10571	686.005	4668.11
CD10	rCDI	CD10_bin29	43	233441	44.15	55508.9	99.4	2.2	Bacteria	Bacillota_C	Negativicutes	Acidaminococcales	Acidaminococcaceae	Phascolarctobacterium	Phascolarctobacterium faecium	684298	2386884	9083.05	3.8054	286.691	1950.87
CD10	rCDI	CD10_bin39	26	360615	41.16	69387.3	99.3	1.09	Bacteria	Bacillota	Bacilli	Lactobacillales	Lactobacillaceae	Ligilactobacillus	Ligilactobacillus animalis	1981287	1804070	26298.7	14.5774	1098.23	7473.22
CD10	rCDI	CD10_bin41	33	84316	45.23	51056	99	1.2	Bacteria	Bacillota_C	Negativicutes	Veillonellales	Megasphaeraceae	Anaeroglobus	Anaeroglobus micronuciformis	780081	1684847	10354.4	6.14562	462.998	3150.6
CD10	rCDI	CD10_bin26	37	468574	58.25	66022.8	97.64	0.8	Bacteria	Actinomycetota	Actinomycetes	Actinomycetales	Bifidobacteriaceae	Bifidobacterium	Bifidobacterium dentium	3780984	2442844	50187	20.5445	1547.78	10532.3
CD10	rCDI	CD10_bin6	166	181099	59.38	25330.8	96.45	0.59	Bacteria	Desulfobacterota	Desulfovibrionia	Desulfovibrionales	Desulfovibrionaceae	Bilophila	Bilophila wadsworthia	456120	4204912	6054.32	1.43982	108.473	738.135
CD10	rCDI	CD10_bin33	39	108474	50.04	56673.8	95.81	0	Bacteria	Bacillota_C	Negativicutes	Acidaminococcales	Acidaminococcaceae	Acidaminococcus	Acidaminococcus intestini	2766220	2210279	36717.5	16.6122	1251.53	8516.35
CD10	rCDI	CD10_bin13	62	161220	41.97	53710.1	94.63	2.68	Bacteria	Bacillota_A	Clostridia	Lachnospirales	Lachnospiraceae	Lachnospira	Lachnospira sp000437735	4596687	3330028	61014.3	18.3225	1380.37	9393.14
CD10	rCDI	CD10_bin9	63	152900	27.84	61195	93.55	1.88	Bacteria	Bacillota_A	Clostridia	Clostridiales	Clostridiaceae	Clostridium	Clostridium tertium	368277	3855285	4888.34	1.26796	95.5252	650.028
CD10	rCDI	CD10_bin10	43	2357171	36.68	84331.4	92.95	4.53	Bacteria	Bacillota_A	Clostridia	Lachnospirales	Lachnospiraceae	KM106-2	Unclassified_KM106-2	1028964	3626252	13658	3.76642	283.754	1930.88
CD10	rCDI	CD10_bin21	57	78362	31.61	52547.3	90.57	4.72	Bacteria	Bacillota_I	Bacilli_A	Erysipelotrichales	Coprobacillaceae	Thomasclavelia	Thomasclavelia ramosa	1970705	2995198	26158.2	8.73339	657.955	4477.23
CD10	rCDI	CD10_bin43	150	7316	38.84	11016.4	89.75	3	Bacteria	Bacillota	Bacilli	Lactobacillales	Streptococcaceae	Streptococcus	Streptococcus thermophilus	208988	1652456	2774.01	1.67872	126.471	860.608
CD10	rCDI	CD10_bin22	163	30739	27.74	18347.2	78.66	4.84	Bacteria	Bacillota_A	Clostridia	Clostridiales	Clostridiaceae	Clostridium	Clostridium cuniculi	304967	2990595	4047.99	1.35357	101.975	693.919
CD10	rCDI	CD10_bin37	916	3218	46.86	2222.07	72.03	1.02	Bacteria	Bacillota	Bacilli	Lactobacillales	Lactobacillaceae	Lacticaseibacillus	Lacticaseibacillus rhamnosus	36044	2035417	478.431	0.235053	17.7084	120.502
CD10	rCDI	CD10_bin45	584	3603	55.79	2461.48	71.83	3.24	Bacteria	Actinomycetota	Actinomycetes	Actinomycetales	Actinomycetaceae	Pauljensenia	Pauljensenia sp938022345	30180	1437503	400.595	0.278674	20.9947	142.864
CD11	rCDI	CD11_bin13	36	64013	26.98	61739.5	100	0	Bacteria	Fusobacteriota	Fusobacteriia	Fusobacteriales	Fusobacteriaceae	Fusobacterium	Fusobacterium animalis	1169120	2222621	30313.8	13.6387	526.01	3677.37
CD11	rCDI	CD11_bin14	56	235664	39.01	36580.5	100	0	Bacteria	Bacillota_C	Negativicutes	Veillonellales	Veillonellaceae	Veillonella	Veillonella atypica	1789060	2048509	46388	22.6448	873.347	6105.63
CD11	rCDI	CD11_bin11	65	30870	56.67	36413.3	100	0.31	Bacteria	Bacillota_C	Negativicutes	Selenomonadales	Selenomonadaceae	Centipeda	Centipeda felix	118107	2366867	3062.36	1.29385	49.9001	348.855
CD11	rCDI	CD11_bin6	64	316562	46.11	48487.4	99.46	0.09	Bacteria	Bacillota	Bacilli	Lactobacillales	Lactobacillaceae	Lacticaseibacillus	Lacticaseibacillus paracasei	2322258	3103194	60213.1	19.4036	748.344	5231.72
CD11	rCDI	CD11_bin15	98	145337	36.79	20751.6	99.27	1.77	Bacteria	Bacillota	Bacilli	Lactobacillales	Lactobacillaceae	Pediococcus	Pediococcus pentosaceus	1371257	2033656	35554.9	17.4833	674.282	4713.95
CD11	rCDI	CD11_bin12	92	111317	41.75	24213.9	98.77	2.06	Bacteria	Bacillota	Bacilli	Lactobacillales	Lactobacillaceae	Pediococcus	Pediococcus acidilactici	904031	2227676	23440.4	10.5223	405.818	2837.1
CD11	rCDI	CD11_bin8	121	113815	48.32	23104.1	98.75	1.98	Bacteria	Pseudomonadota	Gammaproteobacteria	Burkholderiales	Burkholderiaceae	Parasutterella	Parasutterella excrementihominis	2747011	2795597	71226.4	25.4781	982.621	6869.56
CD11	rCDI	CD11_bin21	26	790506	45.69	64150.4	98.2	0	Bacteria	Bacillota_C	Negativicutes	Veillonellales	Megasphaeraceae	Anaeroglobus	Anaeroglobus micronuciformis	732294	1667910	18987.4	11.384	439.049	3069.42
CD11	rCDI	CD11_bin18	32	188193	45.39	58678.3	98.1	0.63	Bacteria	Bacillota_C	Negativicutes	Veillonellales	Dialisteraceae	Dialister	Dialister invisus	338437	1877706	8775.23	4.67338	180.24	1260.07
CD11	rCDI	CD11_bin10	304	6364	35.01	7991.35	97.67	3.08	Bacteria	Bacillota	Bacilli	Lactobacillales	Streptococcaceae	Lactococcus	Lactococcus lactis	81526	2429369	2113.86	0.870129	33.5585	234.61
CD11	rCDI	CD11_bin9	187	28985	67.04	13808.5	97.59	0.16	Bacteria	Actinomycetota	Actinomycetes	Propionibacteriales	Propionibacteriaceae	Propionibacterium	Propionibacterium freudenreichii	96875	2582199	2511.84	0.972754	37.5165	262.28
CD11	rCDI	CD11_bin7	87	192628	46.75	33974.4	96.74	1.63	Bacteria	Bacillota	Bacilli	Lactobacillales	Lactobacillaceae	Lacticaseibacillus	Lacticaseibacillus rhamnosus	418802	2955776	10859	3.67382	141.689	990.559
CD11	rCDI	CD11_bin5	144	262701	44.08	24979	96.3	3.47	Bacteria	Bacillota	Bacilli	Lactobacillales	Lactobacillaceae	Lactiplantibacillus	Lactiplantibacillus plantarum	2241750	3596980	58125.7	16.1596	623.231	4357.05
CD11	rCDI	CD11_bin17	35	673196	41.98	56803.7	95.65	1.22	Bacteria	Bacillota	Bacilli	Lactobacillales	Lactobacillaceae	Latilactobacillus	Latilactobacillus curvatus	240804	1988128	6243.74	3.14051	121.121	846.764
CD11	rCDI	CD11_bin20	530	12939	39.44	3183.07	84.95	1.28	Bacteria	Bacillota	Bacilli	Lactobacillales	Streptococcaceae	Lactococcus_A	Lactococcus_A carnosus	43025	1687029	1115.58	0.661271	25.5034	178.296
CD11	rCDI	CD11_bin23	64	165612	32.93	24478.2	80.63	0.87	Bacteria	Bacillota	Bacilli	Lactobacillales	Lactobacillaceae	Ligilactobacillus	Ligilactobacillus salivarius	81781	1566606	2120.48	1.35355	52.2027	364.952
CD11	rCDI	CD11_bin22	64	108970	41.84	25928	79.31	3.45	Bacteria	Bacillota	Bacilli	Lactobacillales	Lactobacillaceae	Ligilactobacillus	Ligilactobacillus animalis	3060903	1659390	79365.2	47.828	1844.6	12895.7
CD11	rCDI	CD11_bin3	303	87354	52.08	13648.6	70.17	0.86	Bacteria	Pseudomonadota	Gammaproteobacteria	Enterobacterales	Enterobacteriaceae	Citrobacter	Citrobacter freundii	153570	4135528	3981.87	0.962845	37.1343	259.608
CD12	rCDI	CD12_bin14	90	40686	26.7	27771.5	100	0	Bacteria	Fusobacteriota	Fusobacteriia	Fusobacteriales	Fusobacteriaceae	Fusobacterium	Fusobacterium animalis	3148047	2499435	51294.4	20.5224	1259.5	8434.18
CD12	rCDI	CD12_bin20	11	298613	42.13	175207	99.38	0	Bacteria	Bacillota	Bacilli	Lactobacillales	Lactobacillaceae	Pediococcus	Pediococcus acidilactici	1245523	1927281	20294.6	10.5302	646.259	4327.63
CD12	rCDI	CD12_bin7	192	80682	44.44	18185	99.38	4.01	Bacteria	Bacillota	Bacilli	Lactobacillales	Lactobacillaceae	Lactiplantibacillus	Lactiplantibacillus plantarum	1106777	3491527	18033.9	5.16503	316.989	2122.7
CD12	rCDI	CD12_bin23	14	360852	41.16	128547	99.3	0	Bacteria	Bacillota	Bacilli	Lactobacillales	Lactobacillaceae	Ligilactobacillus	Ligilactobacillus animalis	773481	1799664	12603.1	7.00304	429.792	2878.07
CD12	rCDI	CD12_bin13	27	307432	35.26	100997	99.28	1.9	Bacteria	Bacillota_C	Negativicutes	Selenomonadales	ICN-92133	Selenobaculum	Selenobaculum gbiensis	1503099	2726925	24491.5	8.98138	551.207	3691.12
CD12	rCDI	CD12_bin3	52	174839	48.12	89670.6	98.17	0.98	Bacteria	Pseudomonadota	Gammaproteobacteria	Enterobacterales	Enterobacteriaceae	Hafnia	Hafnia paralvei	454067	4662871	7398.58	1.5867	97.3793	652.093
CD12	rCDI	CD12_bin29	23	198341	45.4	72600	97.01	0.6	Bacteria	Bacillota_C	Negativicutes	Veillonellales	Megasphaeraceae	Anaeroglobus	Anaeroglobus micronuciformis	992128	1669801	16165.8	9.68125	594.159	3978.75
CD12	rCDI	CD12_bin17	127	42503	46.67	17185.8	96.97	0.37	Bacteria	Campylobacterota	Campylobacteria	Campylobacterales	Campylobacteraceae	Campylobacter_B	Unclassified_Campylobacter_B	73937	2182596	1204.73	0.551972	33.8757	226.846
CD12	rCDI	CD12_bin19	135	47451	40.45	15348.1	96.81	3.84	Bacteria	Bacillota	Bacilli	Lactobacillales	Streptococcaceae	Streptococcus	Streptococcus gordonii	84003	2072000	1368.75	0.660592	40.542	271.487
CD12	rCDI	CD12_bin10	185	80944	46.74	15708.9	96.47	2.1	Bacteria	Bacillota	Bacilli	Lactobacillales	Lactobacillaceae	Lacticaseibacillus	Lacticaseibacillus rhamnosus	3944649	2906138	64274.2	22.1167	1357.35	9089.41
CD12	rCDI	CD12_bin5	25	100190	40.31	161108	95.68	2.16	Bacteria	Pseudomonadota	Gammaproteobacteria	Enterobacterales	Enterobacteriaceae	Providencia	Providencia rettgeri	245906	4027706	4006.8	0.994809	61.0536	408.841
CD12	rCDI	CD12_bin18	423	16224	62.16	5010.63	91.48	1.77	Bacteria	Actinomycetota	Actinomycetes	Actinomycetales	Micrococcaceae	Rothia	Rothia mucilaginosa_A	56931	2119497	927.635	0.437668	26.8606	179.87
CD12	rCDI	CD12_bin11	313	5797	27.12	8857.48	91.2	2.82	Bacteria	Bacillota_A	Clostridia	Peptostreptococcales	Peptostreptococcaceae	Romboutsia	Romboutsia timonensis	217154	2772392	3538.31	1.27627	78.3273	524.513
CD12	rCDI	CD12_bin26	112	18663	37.49	15987.4	85.51	1.79	Bacteria	Bacillota_A	Clostridia	Oscillospirales	Acutalibacteraceae	UMGS1071	Unclassified_UMGS1071	63396	1790584	1032.98	0.576893	35.4052	237.088
CD12	rCDI	CD12_bin27	643	1441	35.11	2769.8	80.24	1.8	Bacteria	Bacillota	Bacilli	Lactobacillales	Streptococcaceae	Lactococcus	Lactococcus lactis	40867	1780979	665.888	0.373889	22.9464	153.659
CD12	rCDI	CD12_bin21	291	8956	38.52	6339.3	80.23	2.22	Bacteria	Bacillota_C	Negativicutes	Veillonellales	Veillonellaceae	Veillonella	Veillonella nakazawae	229038	1844737	3731.95	2.02303	124.158	831.412
CD12	rCDI	CD12_bin25	154	33165	39.01	11645.7	79.2	4.74	Bacteria	Bacillota_C	Negativicutes	Veillonellales	Veillonellaceae	Veillonella	Veillonella atypica	119093	1793434	1940.5	1.08201	66.405	444.676
CD13	rCDI	CD13_bin18	53	298794	37.87	51810.1	100	0	Bacteria	Bacillota_I	Bacilli_A	Erysipelotrichales	Erysipelotrichaceae	Amedibacillus	Unclassified_Amedibacillus	412465	2745933	8616.23	3.13782	150.209	1170.08
CD13	rCDI	CD13_bin13	52	74159	31.04	64538.2	100	0.94	Bacteria	Bacillota_I	Bacilli_A	Erysipelotrichales	Coprobacillaceae	Coprobacillus	Coprobacillus cateniformis	2043680	3355989	42691.7	12.721	608.965	4743.64
CD13	rCDI	CD13_bin6	117	111727	49.64	35347.6	99.37	1.58	Bacteria	Bacillota_A	Clostridia	Lachnospirales	Lachnospiraceae	Enterocloster	Enterocloster clostridioformis_A	1079515	4135671	22550.7	5.45272	261.025	2033.3
CD13	rCDI	CD13_bin3	106	154277	41.99	43821.1	99.25	2.57	Bacteria	Bacteroidota	Bacteroidia	Bacteroidales	Bacteroidaceae	Phocaeicola	Phocaeicola vulgatus	773502	4645036	16158.2	3.47859	166.522	1297.16
CD13	rCDI	CD13_bin17	96	45991	34.69	31354.7	98.66	0.22	Bacteria	Bacillota_A	Clostridia	Lachnospirales	Lachnospiraceae	Velocimicrobium	Velocimicrobium porci	1295017	3010054	27052.4	8.98735	430.23	3351.36
CD13	rCDI	CD13_bin16	74	72308	40.41	42121.7	98.65	1.88	Bacteria	Bacillota	Bacilli	Lactobacillales	Enterococcaceae	Enterococcus_D	Enterococcus_D gallinarum	312198	3117009	6521.7	2.09229	100.159	780.21
CD13	rCDI	CD13_bin11	89	14250	32.09	39796.2	98.11	4.33	Bacteria	Bacillota_I	Bacilli_A	Erysipelotrichales	Coprobacillaceae	Thomasclavelia	Thomasclavelia ramosa	6065890	3541857	126714	35.7762	1712.63	13340.8
CD13	rCDI	CD13_bin12	85	441928	42.59	39647.4	96.63	3.74	Bacteria	Bacillota	Bacilli	Lactobacillales	Enterococcaceae	Enterococcus_D	Enterococcus_D casseliflavus	3973180	3370027	82998.2	24.6283	1178.98	9183.84
CD13	rCDI	CD13_bin19	54	176954	44.21	41889.2	95.81	2.45	Bacteria	Bacillota_C	Negativicutes	Acidaminococcales	Acidaminococcaceae	Phascolarctobacterium	Phascolarctobacterium faecium	1645231	2262014	34368.2	15.1936	727.33	5665.67
CD13	rCDI	CD13_bin20	120	25712	39.62	18301.5	89.01	2.94	Bacteria	Bacillota	Bacilli	Lactobacillales	Streptococcaceae	Streptococcus	Streptococcus salivarius	97835	2196184	2043.74	0.930585	44.5477	347.012
CD13	rCDI	CD13_bin15	443	3732	43.88	7465.01	87.48	1.68	Bacteria	Bacillota_A	Clostridia	Lachnospirales	Lachnospiraceae	Unclassified_Lachnospiraceae	Unclassified_Lachnospiraceae	105043	3306999	2194.31	0.663534	31.7638	247.43
CD14	rCDI	CD14_bin12	41	188269	35.55	65270.5	100	2.11	Bacteria	Bacillota_C	Negativicutes	Selenomonadales	ICN-92133	Selenobaculum	Selenobaculum gbiensis	1439529	2676090	23631.3	8.83054	537.922	1219.87
CD14	rCDI	CD14_bin8	50	184280	46.62	59779.3	99.46	1.77	Bacteria	Bacillota	Bacilli	Lactobacillales	Lactobacillaceae	Lacticaseibacillus	Lacticaseibacillus rhamnosus	328062	2988964	5385.47	1.80178	109.758	248.901
CD14	rCDI	CD14_bin6	336	1212	54.92	9134.58	99.38	4.81	Bacteria	Pseudomonadota	Gammaproteobacteria	Burkholderiales	Burkholderiaceae	Sutterella	Sutterella wadsworthensis	190752	3069218	3131.39	1.02026	62.15	140.94
CD14	rCDI	CD14_bin23	109	259453	41.7	17821.5	99.3	2.91	Bacteria	Bacillota	Bacilli	Lactobacillales	Lactobacillaceae	Ligilactobacillus	Ligilactobacillus animalis	1276283	1942547	20951.5	10.7856	657.015	1489.94
CD14	rCDI	CD14_bin15	87	51697	63.41	29499.1	99.29	0.95	Bacteria	Desulfobacterota	Desulfovibrionia	Desulfovibrionales	Desulfovibrionaceae	Desulfovibrio	Desulfovibrio sp900556755	562867	2566424	9240.03	3.60035	219.32	497.359
CD14	rCDI	CD14_bin25	41	1298	45.26	44958.3	98.1	0.95	Bacteria	Bacillota_C	Negativicutes	Veillonellales	Dialisteraceae	Dialister	Dialister invisus	757911	1843290	12441.9	6.74982	411.173	932.431
CD14	rCDI	CD14_bin16	172	2314	49.54	13572.8	95.21	3.97	Bacteria	Bacillota_C	Negativicutes	Acidaminococcales	Acidaminococcaceae	Acidaminococcus	Acidaminococcus intestini	3909696	2334520	64181.6	27.4924	1674.73	3797.85
CD14	rCDI	CD14_bin30	403	1149	39.54	4030.78	89.09	4.23	Bacteria	Bacillota	Bacilli	Lactobacillales	Aerococcaceae	Granulicatella	Granulicatella sp001058355	42082	1624403	690.818	0.425275	25.9061	58.7482
CD14	rCDI	CD14_bin28	346	3101	38.81	4983.39	88.82	2.72	Bacteria	Bacillota	Bacilli	Lactobacillales	Streptococcaceae	Streptococcus	Streptococcus anginosus	49919	1724254	819.471	0.475261	28.9511	65.6534
CD14	rCDI	CD14_bin31	199	16238	39.55	7692.69	83.44	4.05	Bacteria	Bacillota	Bacilli	Lactobacillales	Streptococcaceae	Streptococcus	Unclassified_Streptococcus	56979	1530846	935.368	0.611014	37.2206	84.4064
CD14	rCDI	CD14_bin9	1222	1299	60.52	2398.33	77.93	2.09	Bacteria	Desulfobacterota	Desulfovibrionia	Desulfovibrionales	Desulfovibrionaceae	Bilophila	Bilophila wadsworthia	53614	2930755	880.128	0.300308	18.2936	41.485
CD14	rCDI	CD14_bin3	131	115622	56.82	30593.3	75.24	3.45	Bacteria	Pseudomonadota	Gammaproteobacteria	Enterobacterales	Enterobacteriaceae	Cronobacter	Cronobacter sakazakii	250513	4007722	4112.42	1.02612	62.5076	141.751
CD14	rCDI	CD14_bin32	598	3195	32.18	2392.44	73.56	0.75	Bacteria	Fusobacteriota	Fusobacteriia	Fusobacteriales	Leptotrichiaceae	Leptotrichia_A	Leptotrichia_A sp000469505	27828	1430677	456.825	0.319307	19.4509	44.1096
CD14	rCDI	CD14_bin34	561	2940	29.92	2534.82	73.13	2.92	Bacteria	Bacillota	Bacilli	Staphylococcales	Gemellaceae	Gemella	Gemella sanguinis	30633	1422033	502.872	0.353629	21.5417	48.8508
CD15	rCDI	CD15_bin40	19	173987	45.44	89824	100	0	Bacteria	Bacillota_C	Negativicutes	Veillonellales	Megasphaeraceae	Anaeroglobus	Anaeroglobus micronuciformis	479768	1706656	5558.65	3.25704	281.116	1012.69
CD15	rCDI	CD15_bin8	164	95567	59.34	26799.5	100	0	Bacteria	Desulfobacterota	Desulfovibrionia	Desulfovibrionales	Desulfovibrionaceae	Bilophila	Bilophila wadsworthia	4835028	4395122	56019.2	12.7458	1100.09	3962.98
CD15	rCDI	CD15_bin29	34	226040	36.73	58457.3	100	0.37	Bacteria	Bacillota	Bacilli	Lactobacillales	Streptococcaceae	Streptococcus	Streptococcus mutans	100550	1987548	1164.98	0.586142	50.59	182.246
CD15	rCDI	CD15_bin24	51	160559	31.4	41854.3	100	1.12	Bacteria	Fusobacteriota	Fusobacteriia	Fusobacteriales	Fusobacteriaceae	Fusobacterium_B	Fusobacterium_B sp900545035	193324	2134570	2239.88	1.04933	90.5681	326.264
CD15	rCDI	CD15_bin27	27	280175	38.78	76737.7	100	1.3	Bacteria	Bacillota_C	Negativicutes	Veillonellales	Veillonellaceae	Veillonella	Veillonella parvula_A	3284638	2071918	38056.2	18.3676	1585.31	5710.95
CD15	rCDI	CD15_bin2	88	113168	44.86	60692.3	99.42	2.12	Bacteria	Bacteroidota	Bacteroidia	Bacteroidales	Tannerellaceae	Parabacteroides	Parabacteroides distasonis	7709219	5340925	89320	16.7237	1443.42	5199.81
CD15	rCDI	CD15_bin15	68	350516	44.97	45546.5	99.38	2.78	Bacteria	Bacillota	Bacilli	Lactobacillales	Lactobacillaceae	Lactiplantibacillus	Lactiplantibacillus plantarum	419500	3097161	4860.38	1.5693	135.447	487.935
CD15	rCDI	CD15_bin9	309	10996	47.46	13863	99.37	0	Bacteria	Bacillota_A	Clostridia	Lachnospirales	Lachnospiraceae	Otoolea	Otoolea symbiosa	693382	4283677	8033.61	1.8754	161.866	583.108
CD15	rCDI	CD15_bin3	180	65432	49.46	28998	99.37	0.63	Bacteria	Bacillota_A	Clostridia	Lachnospirales	Lachnospiraceae	Enterocloster	Enterocloster clostridioformis	6825833	5219648	79084.9	15.1514	1307.72	4710.94
CD15	rCDI	CD15_bin20	19	162642	35.27	138593	99.28	1.9	Bacteria	Bacillota_C	Negativicutes	Selenomonadales	ICN-92133	Selenobaculum	Selenobaculum gbiensis	1268149	2633266	14692.9	5.57974	481.588	1734.88
CD15	rCDI	CD15_bin34	115	26296	33.9	16332.9	99.07	1.4	Bacteria	Bacillota_A	Clostridia	Tissierellales	Peptoniphilaceae	Peptoniphilus_A	Peptoniphilus_A grossensis	81104	1878278	939.681	0.500289	43.18	155.552
CD15	rCDI	CD15_bin16	292	40795	44.24	10527.4	98.65	0.05	Bacteria	Bacteroidota	Bacteroidia	Bacteroidales	Bacteroidaceae	Prevotella	Prevotella corporis	340704	3074008	3947.44	1.28413	110.834	399.269
CD15	rCDI	CD15_bin30	47	71854	40.05	42234	98.56	1.56	Bacteria	Bacillota_I	Bacilli_A	Acholeplasmatales	Anaeroplasmataceae	Anaeroplasma	Unclassified_Anaeroplasma	2213336	1985000	25644	12.9189	1115.03	4016.8
CD15	rCDI	CD15_bin35	23	259966	41.14	81314.9	98.28	4.7	Bacteria	Bacillota	Bacilli	Lactobacillales	Lactobacillaceae	Ligilactobacillus	Ligilactobacillus animalis	2936841	1870243	34026.6	18.1937	1570.3	5656.86
CD15	rCDI	CD15_bin12	59	295616	57.43	56793.5	98.22	0.59	Bacteria	Desulfobacterota	Desulfovibrionia	Desulfovibrionales	Desulfovibrionaceae	Desulfovibrio	Desulfovibrio desulfuricans_E	709853	3350814	8224.44	2.45446	211.845	763.153
CD15	rCDI	CD15_bin14	67	52376	55.84	46743.6	97.96	2.04	Bacteria	Verrucomicrobiota	Verrucomicrobiae	Verrucomicrobiales	Akkermansiaceae	Akkermansia	Akkermansia sp004167605	6108421	3131824	70772.9	22.598	1950.44	7026.27
CD15	rCDI	CD15_bin13	178	52462	46.05	17665	97.92	1.45	Bacteria	Bacillota	Bacilli	Lactobacillales	Lactobacillaceae	Lacticaseibacillus	Lacticaseibacillus paracasei	149138	3144373	1727.93	0.549531	47.4301	170.863
CD15	rCDI	CD15_bin17	276	19582	46.74	10645.9	97.83	2.49	Bacteria	Bacillota	Bacilli	Lactobacillales	Lactobacillaceae	Lacticaseibacillus	Lacticaseibacillus rhamnosus	1262948	2938259	14632.7	4.98005	429.829	1548.42
CD15	rCDI	CD15_bin36	35	166890	45.42	52022.9	97.47	0.63	Bacteria	Bacillota_C	Negativicutes	Veillonellales	Dialisteraceae	Dialister	Dialister invisus	1012426	1820800	11730.1	6.44227	556.034	2003.06
CD15	rCDI	CD15_bin44	47	70595	48.49	34779.5	96.95	0	Bacteria	Bacillota_A	Clostridia	Tissierellales	Peptoniphilaceae	Murdochiella	Murdochiella massiliensis_A	211286	1634636	2447.99	1.49757	129.256	465.632
CD15	rCDI	CD15_bin11	113	135763	30.62	31656.9	96.63	2.25	Bacteria	Fusobacteriota	Fusobacteriia	Fusobacteriales	Fusobacteriaceae	Fusobacterium_A	Fusobacterium_A ulcerans	5793593	3577232	67125.3	18.7646	1619.57	5834.37
CD15	rCDI	CD15_bin42	105	26680	37	15896.9	96.39	1.07	Bacteria	Bacillota_A	Clostridia	Tissierellales	Peptoniphilaceae	Ezakiella	Ezakiella massiliensis	62405	1669171	723.032	0.433168	37.3868	134.683
CD15	rCDI	CD15_bin18	165	54160	44.65	17210.2	95.97	0	Bacteria	Bacillota_A	Clostridia	Lachnospirales	Anaerotignaceae	Anaerotignum	Anaerotignum lactatifermentans	1283586	2839685	14871.8	5.23712	452.017	1628.35
CD15	rCDI	CD15_bin37	71	16919	48.72	25433.9	95.56	0.03	Bacteria	Bacillota_A	Clostridia	Christensenellales	UBA3700	MGBC120929	MGBC120929 sp910583735	573500	1805810	6644.64	3.67959	317.586	1144.08
CD15	rCDI	CD15_bin21	50	82605	53.08	51399.3	94.76	0.08	Bacteria	Bacillota_A	Clostridia	Christensenellales	Borkfalkiaceae	Borkfalkia	Borkfalkia sp904373255	129728	2569967	1503.04	0.58485	50.4785	181.844
CD15	rCDI	CD15_bin19	55	231866	38.28	49566.2	94.3	1.27	Bacteria	Bacillota_A	Clostridia	Lachnospirales	Lachnospiraceae	Unclassified_Lachnospiraceae	Unclassified_Lachnospiraceae	675864	2726142	7830.64	2.87243	247.92	893.108
CD15	rCDI	CD15_bin26	372	13510	52.8	5601.25	94.13	2.73	Bacteria	Pseudomonadota	Gammaproteobacteria	Burkholderiales	Burkholderiaceae	Oxalobacter	Unclassified_Oxalobacter	49733	2083666	576.213	0.276538	23.868	85.9825
CD15	rCDI	CD15_bin23	459	4426	47.49	4847.57	93.99	3.63	Bacteria	Bacteroidota	Bacteroidia	Bacteroidales	Porphyromonadaceae	Porphyromonas_A	Porphyromonas_A somerae	58612	2225033	679.086	0.305203	26.3421	94.895
CD15	rCDI	CD15_bin43	353	13967	42.28	4639.29	93.47	3.01	Bacteria	Bacillota_C	Negativicutes	Veillonellales	Dialisteraceae	Dialister	Dialister sp900541485	53113	1637671	615.374	0.375762	32.432	116.834
CD15	rCDI	CD15_bin33	42	49905	49.88	46166.1	93.15	0.03	Bacteria	Bacillota_A	Clostridia	Christensenellales	Borkfalkiaceae	Coproplasma	Coproplasma sp944354125	350177	1938974	4057.19	2.09244	180.599	650.592
CD15	rCDI	CD15_bin32	258	6361	58.46	7587.11	92.94	2.06	Bacteria	Actinomycetota	Actinomycetes	Mycobacteriales	Mycobacteriaceae	Lawsonella	Lawsonella clevelandensis	56914	1957474	659.413	0.336869	29.0752	104.741
CD15	rCDI	CD15_bin28	420	57214	56.26	4742.14	92.15	3.09	Bacteria	Actinomycetota	Actinomycetes	Propionibacteriales	Propionibacteriaceae	Propionimicrobium	Propionimicrobium lymphophilum	46702	1991698	541.095	0.271675	23.4483	84.4706
CD15	rCDI	CD15_bin39	61	27685	38.34	28018.1	90.91	0	Bacteria	Bacillota_A	Clostridia	Peptostreptococcales	Anaerovoracaceae	S5-A14a	S5-A14a sp000758905	82929	1709106	960.826	0.56218	48.5219	174.796
CD15	rCDI	CD15_bin1	121	241867	55.2	46281.4	90.4	2.77	Bacteria	Pseudomonadota	Gammaproteobacteria	Enterobacterales	Enterobacteriaceae	Klebsiella	Klebsiella oxytoca	4425724	5600053	51277	9.15652	790.3	2846.99
CD15	rCDI	CD15_bin38	407	7272	56.55	4284.17	84.83	2.82	Bacteria	Bacteroidota	Bacteroidia	Bacteroidales	Porphyromonadaceae	Porphyromonas_A	Porphyromonas_A sp001808555	38210	1743659	442.706	0.253895	21.9137	78.9421
CD15	rCDI	CD15_bin5	99	63923	53.13	46739.3	74.47	4.31	Bacteria	Pseudomonadota	Gammaproteobacteria	Enterobacterales	Enterobacteriaceae	Phytobacter	Phytobacter diazotrophicus	313231	4627194	3629.13	0.784305	67.6935	243.86
CD15	rCDI	CD15_bin47	677	2278	47.91	2212.24	72.34	4.28	Bacteria	Bacillota	Bacilli	Lactobacillales	Aerococcaceae	Aerococcus	Aerococcus sp001809535	25458	1497689	294.96	0.196943	16.9982	61.2345
CD16	rCDI	CD16_bin12	64	123081	35.9	47452.9	100	0	Bacteria	Bacillota_I	Bacilli_A	Erysipelotrichales	Coprobacillaceae	Beduini	Beduini sp902363625	1677619	3036984	31314.6	10.3111	552.396	3966.17
CD16	rCDI	CD16_bin6	46	570562	37.9	84389.6	100	0.6	Bacteria	Pseudomonadota	Gammaproteobacteria	Enterobacterales	Enterobacteriaceae	Proteus	Proteus vulgaris	409757	3881924	7648.57	1.9703	105.555	757.88
CD16	rCDI	CD16_bin24	24	468375	42.2	64137.7	100	0.61	Bacteria	Actinomycetota	Actinomycetes	Actinomycetales	Bifidobacteriaceae	Bifidobacterium	Bifidobacterium leopoldii	109028	1539305	2035.13	1.32211	70.8294	508.551
CD16	rCDI	CD16_bin17	148	1064	40.25	14962	100	2.03	Bacteria	Bacillota_C	Negativicutes	Veillonellales	Veillonellaceae	Veillonella	Veillonella sp009929605	1612224	2214373	30094	13.5903	728.072	5227.52
CD16	rCDI	CD16_bin13	292	41944	34.92	9734.92	100	3.1	Bacteria	Bacillota	Bacilli	Lactobacillales	Streptococcaceae	Lactococcus	Lactococcus lactis	186828	2842598	3487.35	1.22682	65.7244	471.897
CD16	rCDI	CD16_bin4	60	1193581	50.93	69629.3	99.95	1.49	Bacteria	Pseudomonadota	Gammaproteobacteria	Enterobacterales	Enterobacteriaceae	Morganella	Morganella morganii	400943	4177758	7484.05	1.7914	95.9709	689.065
CD16	rCDI	CD16_bin3	199	71977	59.66	21327.6	99.41	1.48	Bacteria	Desulfobacterota	Desulfovibrionia	Desulfovibrionales	Desulfovibrionaceae	Bilophila	Bilophila wadsworthia	1082635	4244190	20208.6	4.76147	255.086	1831.51
CD16	rCDI	CD16_bin14	75	365124	35.77	37281.7	99.37	1.9	Bacteria	Bacillota_C	Negativicutes	Selenomonadales	ICN-92133	Selenobaculum	Selenobaculum gbiensis	697473	2796130	13019.1	4.65612	249.442	1790.98
CD16	rCDI	CD16_bin20	34	66139	41.29	53891.7	99.3	1.57	Bacteria	Bacillota	Bacilli	Lactobacillales	Lactobacillaceae	Ligilactobacillus	Ligilactobacillus animalis	2092455	1832318	39058	21.3162	1141.97	8199.29
CD16	rCDI	CD16_bin26	52	4474	32.74	25436	98.77	0.18	Bacteria	Bacillota	Bacilli	Lactobacillales	Lactobacillaceae	Lactobacillus	Lactobacillus iners	57123	1322672	1066.26	0.806145	43.1876	310.084
CD16	rCDI	CD16_bin9	157	246741	57.18	23375.7	98.32	4.5	Bacteria	Bacteroidota	Bacteroidia	Bacteroidales	Rikenellaceae	Alistipes	Alistipes onderdonkii	6619397	3669987	123558	33.6673	1803.66	12950.2
CD16	rCDI	CD16_bin11	49	222863	58.13	63145.2	97.96	0.68	Bacteria	Verrucomicrobiota	Verrucomicrobiae	Verrucomicrobiales	Akkermansiaceae	Akkermansia	Akkermansia muciniphila_F	1625441	3094115	30340.7	9.80593	525.333	3771.86
CD16	rCDI	CD16_bin21	46	527159	50.19	38790.8	97.01	0	Bacteria	Bacillota_C	Negativicutes	Veillonellales	Megasphaeraceae	Anaeroglobus	Anaeroglobus massiliensis	952907	1784378	17787.1	9.96822	534.028	3834.29
CD16	rCDI	CD16_bin27	12	258364	35.07	102858	96.11	0	Bacteria	Bacillota_C	Negativicutes	Veillonellales	Dialisteraceae	Allisonella	Allisonella pneumosinta	119334	1234297	2227.5	1.80467	96.6818	694.169
CD16	rCDI	CD16_bin15	45	468300	51.63	54384.8	93.95	2.45	Bacteria	Bacillota_A	Clostridia	Christensenellales	Borkfalkiaceae	Borkfalkia	Borkfalkia ceftriaxoniphila	3237718	2447317	60435.6	24.6946	1322.97	9498.82
CD16	rCDI	CD16_bin18	108	6514	49.94	19984.9	91.02	1.55	Bacteria	Bacillota_C	Negativicutes	Acidaminococcales	Acidaminococcaceae	Acidaminococcus	Acidaminococcus intestini	2532742	2158368	47276.5	21.9038	1173.45	8425.32
CD16	rCDI	CD16_bin23	391	14949	39.02	4017.28	86.72	4.73	Bacteria	Bacillota	Bacilli	Lactobacillales	Streptococcaceae	Streptococcus	Streptococcus thermophilus	60744	1570757	1133.85	0.721852	38.6718	277.661
CD17	rCDI	CD17_bin35	59	3597	31.52	37962.5	100	1.12	Bacteria	Fusobacteriota	Fusobacteriia	Fusobacteriales	Fusobacteriaceae	Fusobacterium_B	Fusobacterium_B sp900545035	1824985	2239789	40716.9	18.1789	814.802	12493.4
CD17	rCDI	CD17_bin10	62	10167	47.04	57568.6	100	1.27	Bacteria	Bacillota_I	Bacilli_A	Erysipelotrichales	Erysipelotrichaceae	Holdemania	Holdemania massiliensis	279312	3569250	6231.67	1.74593	78.2551	1199.88
CD17	rCDI	CD17_bin38	66	92139	59.81	33074.6	100	1.61	Bacteria	Actinomycetota	Coriobacteriia	Coriobacteriales	Coriobacteriaceae	Collinsella	Collinsella aerofaciens_F	2163271	2182921	48264.3	22.11	990.998	15195
CD17	rCDI	CD17_bin32	37	21368	43.92	65404.7	100	1.65	Bacteria	Bacillota_C	Negativicutes	Acidaminococcales	Acidaminococcaceae	Phascolarctobacterium	Phascolarctobacterium faecium	1343249	2419975	29969	12.384	555.067	8510.84
CD17	rCDI	CD17_bin34	101	92848	39.86	22230	99.88	4.33	Bacteria	Bacillota	Bacilli	Lactobacillales	Streptococcaceae	Streptococcus	Streptococcus sp001556435	107134	2245233	2390.25	1.06459	47.7162	731.632
CD17	rCDI	CD17_bin6	101	104415	59.56	40926.1	99.83	2.37	Bacteria	Desulfobacterota	Desulfovibrionia	Desulfovibrionales	Desulfovibrionaceae	Bilophila	Bilophila wadsworthia	451932	4133535	10083	2.43931	109.333	1676.4
CD17	rCDI	CD17_bin13	113	68352	42.61	30150.4	99.54	2.15	Bacteria	Bacillota	Bacilli	Lactobacillales	Enterococcaceae	Enterococcus_D	Enterococcus_D casseliflavus	132564	3406993	2957.61	0.8681	38.9094	596.597
CD17	rCDI	CD17_bin39	44	129684	38.49	47702.8	99.46	0	Bacteria	Bacillota	Bacilli	Lactobacillales	Lactobacillaceae	Limosilactobacillus	Limosilactobacillus reuteri_H	86376	2098925	1927.12	0.918145	41.1525	630.991
CD17	rCDI	CD17_bin5	273	18813	41.86	15165.5	99.42	4.29	Bacteria	Bacillota_A	Clostridia	Lachnospirales	Lachnospiraceae	Ruminococcus_B	Ruminococcus_B gnavus	1552009	4140176	34626.6	8.36355	374.865	5747.81
CD17	rCDI	CD17_bin14	93	162750	43.21	35025.1	99.37	0.63	Bacteria	Bacillota_A	Clostridia	Lachnospirales	Lachnospiraceae	Blautia_A	Blautia_A caecimuris	315459	3257330	7038.14	2.16071	96.8459	1484.94
CD17	rCDI	CD17_bin9	125	60967	44.87	28924.6	99.32	4.29	Bacteria	Bacteroidota	Bacteroidia	Bacteroidales	Bacteroidaceae	Prevotella	Prevotella copri_B	654494	3615577	14602.3	4.03872	181.021	2775.59
CD17	rCDI	CD17_bin1	56	234016	42.63	111845	99.26	1.73	Bacteria	Bacteroidota	Bacteroidia	Bacteroidales	Bacteroidaceae	Bacteroides	Bacteroides thetaiotaomicron	4788634	6263330	106838	17.0577	764.551	11722.8
CD17	rCDI	CD17_bin40	86	8215	43.77	24236.4	98.95	0	Bacteria	Bacillota	Bacilli	Lactobacillales	Lactobacillaceae	Ligilactobacillus	Ligilactobacillus ruminis	2629094	2084327	58657.2	28.142	1261.36	19340.5
CD17	rCDI	CD17_bin12	48	210735	44.93	71329.9	98.83	2.94	Bacteria	Bacillota_A	Clostridia	Lachnospirales	Lachnospiraceae	Sellimonas	Sellimonas intestinalis	3035516	3423837	67724.8	19.7804	886.583	13594
CD17	rCDI	CD17_bin20	77	15303	53.69	37576.9	98.66	0.34	Bacteria	Bacillota_A	Clostridia	Oscillospirales	Acutalibacteraceae	Anaeromassilibacillus	Anaeromassilibacillus stercoravium	202661	2893422	4521.53	1.56269	70.042	1073.95
CD17	rCDI	CD17_bin31	103	24795	43.39	23706.4	98.23	0	Bacteria	Bacillota_A	Clostridia	Peptostreptococcales	Anaerovoracaceae	Emergencia	Unclassified_Emergencia	195785	2441759	4368.12	1.78892	80.182	1229.43
CD17	rCDI	CD17_bin3	169	86404	49.8	29836.2	98.19	2.85	Bacteria	Bacillota_A	Clostridia	Lachnospirales	Lachnospiraceae	AF33-28	AF33-28 sp003477885	213666	5042313	4767.06	0.945411	42.3746	649.729
CD17	rCDI	CD17_bin43	17	121973	42.05	114211	98.15	0	Bacteria	Bacillota	Bacilli	Lactobacillales	Lactobacillaceae	Pediococcus	Pediococcus acidilactici	308320	1941587	6878.87	3.54291	158.798	2434.85
CD17	rCDI	CD17_bin24	73	86231	54.91	37144.8	97.99	2.01	Bacteria	Bacillota_A	Clostridia	Oscillospirales	Acutalibacteraceae	JAGZMM01	Unclassified_JAGZMM01	126544	2711571	2823.3	1.0412	46.6681	715.562
CD17	rCDI	CD17_bin22	39	109188	55.53	70992.2	97.96	0.68	Bacteria	Verrucomicrobiota	Verrucomicrobiae	Verrucomicrobiales	Akkermansiaceae	Akkermansia	Akkermansia muciniphila	4942407	2768695	110269	39.8271	1785.1	27371
CD17	rCDI	CD17_bin11	342	17319	64.32	10013.4	97.36	1.61	Bacteria	Actinomycetota	Coriobacteriia	Coriobacteriales	Eggerthellaceae	Eggerthella	Eggerthella lenta	99016	3424564	2209.13	0.645082	28.9135	443.33
CD17	rCDI	CD17_bin17	94	280683	46.73	33681.2	96.84	0	Bacteria	Bacillota_A	Clostridia	Lachnospirales	Lachnospiraceae	Enterocloster	Enterocloster sp001517625	620481	3166030	13843.4	4.37249	195.981	3004.97
CD17	rCDI	CD17_bin16	69	52927	61.36	46951.6	96.6	0	Bacteria	Bacillota_A	Clostridia	Oscillospirales	Ruminococcaceae	Fournierella	Fournierella sp900543285	145383	3239661	3243.61	1.00122	44.876	688.083
CD17	rCDI	CD17_bin4	191	39016	43.82	22342.5	96.23	0	Bacteria	Bacillota_I	Bacilli_A	Erysipelotrichales	Erysipelotrichaceae	Clostridium_AQ	Clostridium_AQ innocuum	194249	4267427	4333.85	1.01557	45.519	697.942
CD17	rCDI	CD17_bin23	118	157579	55.43	23241.3	95.97	0.67	Bacteria	Bacillota_A	Clostridia	Oscillospirales	Acutalibacteraceae	Acutalibacter	Acutalibacter sp900548545	416223	2742472	9286.27	3.38609	151.769	2327.08
CD17	rCDI	CD17_bin7	226	45896	56.58	16411.2	95.92	0.04	Bacteria	Bacillota_A	Clostridia	Oscillospirales	Ruminococcaceae	Ruthenibacterium	Ruthenibacterium lactatiformans	282332	3708921	6299.05	1.69835	76.1224	1167.18
CD17	rCDI	CD17_bin30	455	5293	58.44	5448.47	94.9	2.52	Bacteria	Actinomycetota	Actinomycetes	Actinomycetales	Bifidobacteriaceae	Bifidobacterium	Bifidobacterium dentium	62754	2479054	1400.09	0.564769	25.3137	388.135
CD17	rCDI	CD17_bin27	181	36470	54.45	14493.2	94.87	1.48	Bacteria	Bacillota_A	Clostridia	Oscillospirales	Butyricicoccaceae	Agathobaculum	Agathobaculum butyriciproducens	118002	2623266	2632.72	1.0036	44.9829	689.722
CD17	rCDI	CD17_bin33	435	2954	67.54	5397.46	94.52	1.44	Bacteria	Actinomycetota	Actinomycetes	Propionibacteriales	Propionibacteriaceae	Propionibacterium	Propionibacterium freudenreichii	58123	2347897	1296.77	0.552312	24.7553	379.573
CD17	rCDI	CD17_bin2	93	139024	46.51	64215.7	93.67	0.63	Bacteria	Bacillota_A	Clostridia	Lachnospirales	Lachnospiraceae	Blautia	Blautia celeris	3361919	5972059	75007.1	12.5597	562.941	8631.57
CD17	rCDI	CD17_bin21	148	3545	44.63	19223.8	93.29	0.22	Bacteria	Bacillota_A	Clostridia	Lachnospirales	Anaerotignaceae	Anaerotignum	Anaerotignum lactatifermentans	1169975	2845123	26103.1	9.17468	411.221	6305.25
CD17	rCDI	CD17_bin19	431	17667	44.71	7164.75	92.73	4.7	Bacteria	Bacillota_A	Clostridia	Lachnospirales	Lachnospiraceae	Anaerostipes	Anaerostipes caccae	84549	3088008	1886.36	0.610865	27.3798	419.814
CD17	rCDI	CD17_bin29	120	69364	31.88	21490	87.74	2.36	Bacteria	Bacillota_I	Bacilli_A	Erysipelotrichales	Coprobacillaceae	Thomasclavelia	Thomasclavelia ramosa	107011	2578805	2387.5	0.925817	41.4964	636.263
CD17	rCDI	CD17_bin36	310	9065	35.85	7114.18	85.85	1.63	Bacteria	Bacillota_C	Negativicutes	Selenomonadales	ICN-92133	Selenobaculum	Selenobaculum gbiensis	67476	2205396	1505.44	0.682618	30.5959	469.126
CD17	rCDI	CD17_bin8	141	93669	60.48	25976.5	85.29	1.48	Bacteria	Bacillota_A	Clostridia	Oscillospirales	Oscillospiraceae	Flavonifractor	Flavonifractor plautii	1284825	3662693	28665.5	7.82634	350.787	5378.61
CD17	rCDI	CD17_bin26	321	10394	26.94	8231.96	74.14	1.72	Bacteria	Bacillota_A	Clostridia	Peptostreptococcales	Peptostreptococcaceae	Romboutsia	Romboutsia timonensis	84978	2642458	1895.93	0.717486	32.1587	493.089
CD17	rCDI	CD17_bin37	793	9667	58.28	2760.39	72.51	3.08	Bacteria	Desulfobacterota	Desulfovibrionia	Desulfovibrionales	Desulfovibrionaceae	Desulfovibrio	Desulfovibrio desulfuricans_E	41935	2188988	935.603	0.427414	19.1573	293.738
CD17	rCDI	CD17_bin42	890	4757	45.11	2266.84	71.97	3.41	Bacteria	Bacillota_A	Clostridia	Oscillospirales	Ruminococcaceae	Massiliimalia	Unclassified_Massiliimalia	36140	2017486	806.312	0.399662	17.9134	274.666
CD18	rCDI	CD18_bin8	157	11756	44.16	27117.9	100	0	Bacteria	Bacillota_I	Bacilli_A	Erysipelotrichales	Erysipelotrichaceae	Clostridium_AQ	Clostridium_AQ innocuum	1013997	4257508	11243	2.64075	238.167	1612.07
CD18	rCDI	CD18_bin11	216	57146	59.43	18919.2	99.41	0.59	Bacteria	Desulfobacterota	Desulfovibrionia	Desulfovibrionales	Desulfovibrionaceae	Bilophila	Bilophila wadsworthia	486966	4086545	5399.38	1.32126	119.163	806.577
CD18	rCDI	CD18_bin19	35	28030	45.01	101749	99.37	3.16	Bacteria	Bacillota_A	Clostridia	Lachnospirales	Lachnospiraceae	Blautia_A	Blautia_A hydrogenotrophica	573465	3561216	6358.47	1.78548	161.031	1089.96
CD18	rCDI	CD18_bin30	87	108106	49.32	35021.7	99.33	3.24	Bacteria	Bacillota_A	Clostridia	Lachnospirales	Bianqueaceae	Faecimorpha	Faecimorpha stercoravium	527035	3046889	5843.66	1.91791	172.975	1170.81
CD18	rCDI	CD18_bin5	64	188275	45.67	69938.1	99.29	2.17	Bacteria	Bacillota_A	Clostridia	Peptostreptococcales	Anaerovoracaceae	Emergencia	Emergencia timonensis	373277	4476038	4138.82	0.924662	83.3945	564.47
CD18	rCDI	CD18_bin35	122	24582	41.02	23645.4	98.83	2.92	Bacteria	Bacillota_A	Clostridia	Lachnospirales	Lachnospiraceae	Dorea_A	Dorea_A longicatena	323942	2884735	3591.81	1.24511	112.295	760.09
CD18	rCDI	CD18_bin6	81	343634	47.28	53358.5	98.58	1.77	Bacteria	Bacillota_A	Clostridia	Peptostreptococcales	Anaerovoracaceae	Hominibacterium	Hominibacterium faecale	317237	4322039	3517.46	0.813843	73.3998	496.82
CD18	rCDI	CD18_bin34	98	156794	40.7	29484.3	97.99	3.36	Bacteria	Bacillota_A	Clostridia	Lachnospirales	Lachnospiraceae	Eubacterium_F	Eubacterium_F sp003491505	366314	2889461	4061.62	1.40567	126.776	858.105
CD18	rCDI	CD18_bin29	39	275756	58.06	79380.8	97.96	0	Bacteria	Verrucomicrobiota	Verrucomicrobiae	Verrucomicrobiales	Akkermansiaceae	Akkermansia	Akkermansia massiliensis	231954	3095850	2571.86	0.830745	74.9242	507.137
CD18	rCDI	CD18_bin28	178	10610	46.52	17594.9	97.58	3.72	Bacteria	Bacillota_A	Clostridia	Lachnospirales	Lachnospiraceae	Clostridium_AP	Clostridium_AP scindens	118738	3131889	1316.54	0.420367	37.9126	256.618
CD18	rCDI	CD18_bin4	91	48902	46.13	50574.5	97.47	0.34	Bacteria	Bacillota_A	Clostridia	Lachnospirales	Lachnospiraceae	Lactonifactor	Lactonifactor sp009677585	215291	4602282	2387.1	0.518678	46.7792	316.633
CD18	rCDI	CD18_bin26	147	91330	42.68	21440.8	97.08	1.99	Bacteria	Bacillota_A	Clostridia	Lachnospirales	Lachnospiraceae	Bariatricus	Bariatricus comes	3057026	3151794	33895.7	10.7544	969.932	6565.16
CD18	rCDI	CD18_bin43	253	13379	54.04	10810.2	96.64	0.69	Bacteria	Bacillota_A	Clostridia	Oscillospirales	Butyricicoccaceae	Agathobaculum	Agathobaculum butyriciproducens	159854	2734972	1772.43	0.648061	58.4481	395.616
CD18	rCDI	CD18_bin51	160	8534	58.33	15175.4	96.31	3.44	Bacteria	Bacillota_A	Clostridia	Oscillospirales	Oscillospiraceae	Evtepia	Evtepia gabavorous	111755	2428067	1239.12	0.510331	46.0263	311.537
CD18	rCDI	CD18_bin48	100	689660	41.52	26789.3	95.32	0.9	Bacteria	Bacillota_A	Clostridia	Lachnospirales	Lachnospiraceae	Dorea_D	Dorea_D hominis	665677	2678935	7380.9	2.75516	248.486	1681.92
CD18	rCDI	CD18_bin10	79	136389	49.46	52848.4	94.94	2.27	Bacteria	Bacillota_A	Clostridia	Lachnospirales	Lachnospiraceae	Marvinbryantia	Marvinbryantia sp900550755	1020907	4175026	11319.6	2.71127	244.527	1655.12
CD18	rCDI	CD18_bin52	97	202694	59.83	24450.7	93.29	2.06	Bacteria	Bacillota_A	Clostridia	Oscillospirales	Oscillospiraceae	CAG-103	CAG-103 sp900757655	499024	2371716	5533.08	2.33294	210.406	1424.17
CD18	rCDI	CD18_bin1	293	23747	46.65	20402.6	92.41	2.81	Bacteria	Bacillota_A	Clostridia	Lachnospirales	Lachnospiraceae	Blautia	Blautia celeris	3048379	5977958	33799.8	5.65408	509.937	3451.59
CD18	rCDI	CD18_bin56	40	103809	54.91	53126.9	91.61	0.7	Bacteria	Pseudomonadota	Gammaproteobacteria	Burkholderiales	Burkholderiaceae	Sutterella	Sutterella wadsworthensis	386565	2125075	4286.16	2.01694	181.907	1231.27
CD18	rCDI	CD18_bin2	197	64170	46.17	30150.2	90.8	4.75	Bacteria	Bacillota_A	Clostridia	Lachnospirales	Lachnospiraceae	Blautia	Blautia hominis	533318	5939582	5913.33	0.995579	89.7905	607.763
CD18	rCDI	CD18_bin41	206	17681	37.82	13495.1	90.44	4.7	Bacteria	Bacillota_A	Clostridia	Lachnospirales	Lachnospiraceae	Anaerobutyricum	Anaerobutyricum soehngenii	1183860	2779982	13126.4	4.72176	425.852	2882.45
CD18	rCDI	CD18_bin59	103	169270	38.32	18473.1	89.62	2.36	Bacteria	Bacillota_I	Bacilli_A	Erysipelotrichales	Erysipelotrichaceae	Amedibacillus	Amedibacillus dolichus	80727	1902732	895.085	0.470421	42.4269	287.174
CD18	rCDI	CD18_bin42	197	18672	43.13	14042	87.85	1.9	Bacteria	Bacillota_A	Clostridia	Lachnospirales	Lachnospiraceae	Blautia_A	Blautia_A ammoniilytica	157584	2766276	1747.26	0.631629	56.9661	385.585
CD18	rCDI	CD18_bin37	89	92435	49.1	31644.2	87.79	4.92	Bacteria	Bacillota_A	Clostridia	Oscillospirales	Acutalibacteraceae	Clostridium_A	Clostridium_A leptum	526422	2816332	5836.86	2.07251	186.918	1265.18
CD18	rCDI	CD18_bin40	426	14484	56.59	6544.86	87.6	4.38	Bacteria	Bacillota_A	Clostridia	Oscillospirales	Oscillospiraceae	Faecousia	Faecousia sp000435995	131680	2788112	1460.04	0.523667	47.2291	319.678
CD18	rCDI	CD18_bin49	290	7164	58.03	9171.69	86.91	4.93	Bacteria	Bacillota_A	Clostridia	Oscillospirales	Oscillospiraceae	Enterenecus	Enterenecus sp900549885	97319	2659791	1079.05	0.405691	36.589	247.659
CD18	rCDI	CD18_bin9	67	25739	50.5	62392.6	84.53	0.75	Bacteria	Pseudomonadota	Gammaproteobacteria	Enterobacterales	Enterobacteriaceae	Escherichia	Escherichia coli	1653340	4180305	18331.9	4.3853	395.507	2677.06
CD18	rCDI	CD18_bin57	468	9370	42.24	4157.75	84.11	1.92	Bacteria	Bacillota_A	Clostridia	Christensenellales	Christensenellaceae	HGM11616	HGM11616 sp900761075	46748	1945828	518.333	0.266382	24.0247	162.616
CD18	rCDI	CD18_bin45	123	157527	41.58	22154.4	82.47	2.39	Bacteria	Bacillota_A	Clostridia	Lachnospirales	Lachnospiraceae	Lachnospira	Lachnospira sp000437735	388277	2724994	4305.14	1.57987	142.487	964.45
CD18	rCDI	CD18_bin39	6	640587	58	469235	80.21	0	Bacteria	Bacteroidota	Bacteroidia	Bacteroidales	Rikenellaceae	Alistipes	Alistipes finegoldii	5014334	2815409	55598	19.7477	1781.03	12055.2
CD19	rCDI	CD19_bin30	82	94987	50.83	30791.4	100	0	Bacteria	Bacillota_C	Negativicutes	Veillonellales	Megasphaeraceae	Megasphaera	Megasphaera sp001546855	1343059	2524897	33828.6	13.398	531.926	4398.8
CD19	rCDI	CD19_bin16	79	256902	31.4	45114.3	100	0.47	Bacteria	Bacillota_I	Bacilli_A	Erysipelotrichales	Coprobacillaceae	Thomasclavelia	Thomasclavelia ramosa	1134878	3564028	28585	8.02042	318.426	2633.24
CD19	rCDI	CD19_bin18	118	60460	30.57	29803.1	100	3.37	Bacteria	Fusobacteriota	Fusobacteriia	Fusobacteriales	Fusobacteriaceae	Fusobacterium_A	Fusobacterium_A ulcerans	1015855	3516767	25587.1	7.27574	288.86	2388.75
CD19	rCDI	CD19_bin10	108	31872	43.84	37211.8	100	3.77	Bacteria	Bacillota_I	Bacilli_A	Erysipelotrichales	Erysipelotrichaceae	Clostridium_AQ	Clostridium_AQ innocuum	3827516	4018871	96406.5	23.9885	952.386	7875.82
CD19	rCDI	CD19_bin32	56	45413	54.03	41211	99.52	1.28	Bacteria	Bacteroidota	Bacteroidia	Bacteroidales	Rikenellaceae	Alistipes	Alistipes putredinis	181383	2307815	4568.63	1.97963	78.5951	649.948
CD19	rCDI	CD19_bin11	341	26209	42.42	11657	99.42	3.02	Bacteria	Bacillota_A	Clostridia	Lachnospirales	Lachnospiraceae	Ruminococcus_B	Ruminococcus_B gnavus	2371893	3975032	59742.6	15.0295	596.698	4934.43
CD19	rCDI	CD19_bin6	213	82201	47.57	23490.6	99.37	0	Bacteria	Bacillota_A	Clostridia	Lachnospirales	Lachnospiraceae	Otoolea	Otoolea symbiosa	376126	5003490	9473.77	1.89343	75.1727	621.646
CD19	rCDI	CD19_bin17	131	95373	44.57	27153.4	99.37	0.79	Bacteria	Bacillota_A	Clostridia	Lachnospirales	Lachnospiraceae	Blautia_A	Blautia_A sp019416265	421393	3557091	10613.9	2.98388	118.466	979.659
CD19	rCDI	CD19_bin15	127	73289	61.24	28924.9	99.33	0.81	Bacteria	Bacillota_A	Clostridia	Oscillospirales	Oscillospiraceae	Flavonifractor	Flavonifractor plautii	251373	3673457	6331.52	1.72359	68.4295	565.883
CD19	rCDI	CD19_bin4	139	44711	50.09	39182.4	99.27	0.95	Bacteria	Bacillota_A	Clostridia	Lachnospirales	Lachnospiraceae	Enterocloster	Enterocloster aldenensis	592803	5446356	14931.4	2.74153	108.844	900.092
CD19	rCDI	CD19_bin31	113	70284	35.07	20818	98.87	1.76	Bacteria	Bacillota	Bacilli	Lactobacillales	Streptococcaceae	Lactococcus	Lactococcus lactis	132163	2352435	3328.89	1.41508	56.1814	464.595
CD19	rCDI	CD19_bin23	131	288692	40.45	22306.2	98.73	0.95	Bacteria	Bacillota_A	Clostridia	Lachnospirales	Lachnospiraceae	Faecalimonas	Unclassified_Faecalimonas	1735024	2922111	43701.3	14.9554	593.757	4910.11
CD19	rCDI	CD19_bin1	258	204998	47.88	25961.9	98.28	3.64	Bacteria	Bacillota_A	Clostridia	Lachnospirales	Lachnospiraceae	Eisenbergiella	Eisenbergiella porci	256054	6698171	6449.42	0.962863	38.2275	316.124
CD19	rCDI	CD19_bin21	95	224879	46.34	34535.1	97.66	0.68	Bacteria	Bacillota_A	Clostridia	Lachnospirales	Lachnospiraceae	Clostridium_AP	Clostridium_AP scindens	466339	3280832	11746	3.5802	142.14	1175.44
CD19	rCDI	CD19_bin2	384	32427	46.24	17391.8	97.47	3.82	Bacteria	Bacillota_A	Clostridia	Lachnospirales	Lachnospiraceae	Blautia	Blautia celeris	1008353	6678460	25398.1	3.80299	150.986	1248.59
CD19	rCDI	CD19_bin25	500	15829	48.28	5777.71	96.88	4.64	Bacteria	Pseudomonadota	Gammaproteobacteria	Burkholderiales	Burkholderiaceae	Parasutterella	Parasutterella excrementihominis	93534	2888857	2355.91	0.815516	32.3775	267.748
CD19	rCDI	CD19_bin27	57	181050	37.71	49483.1	95.97	0	Bacteria	Bacillota_A	Clostridia	Lachnospirales	Lachnospiraceae	Lachnospira	Lachnospira eligens_A	142885	2820539	3598.95	1.27598	50.6588	418.926
CD19	rCDI	CD19_bin3	106	54732	49.27	62067.2	93.65	3.01	Bacteria	Bacillota_A	Clostridia	Lachnospirales	Lachnospiraceae	Hungatella	Hungatella effluvii	573678	6579123	14449.7	2.19629	87.1967	721.079
CD19	rCDI	CD19_bin19	142	580654	57.2	24514.6	92.07	3.25	Bacteria	Bacteroidota	Bacteroidia	Bacteroidales	Rikenellaceae	Alistipes	Alistipes onderdonkii	4480765	3481067	112860	32.4212	1287.18	10644.4
CD19	rCDI	CD19_bin22	1177	3180	60.36	2664.26	86.9	1.97	Bacteria	Desulfobacterota	Desulfovibrionia	Desulfovibrionales	Desulfovibrionaceae	Bilophila	Bilophila wadsworthia	63889	3135829	1609.22	0.513172	20.3739	168.483
CD19	rCDI	CD19_bin24	904	6058	51.98	3197.14	83.57	2.82	Bacteria	Bacillota_A	Clostridia	Oscillospirales	Ruminococcaceae	Massilioclostridium	Massilioclostridium methylpentosum	61264	2890213	1543.1	0.533906	21.1971	175.29
CD19	rCDI	CD19_bin29	750	3566	30.16	3451.81	83.12	1.35	Bacteria	Bacillota_I	Bacilli_A	Erysipelotrichales	Coprobacillaceae	Thomasclavelia	Thomasclavelia sp000508865	60695	2588855	1528.77	0.59052	23.4447	193.878
CD19	rCDI	CD19_bin26	629	13391	28.75	4497.02	80.86	1.08	Bacteria	Bacillota_A	Clostridia	Clostridiales	Clostridiaceae	Clostridium	Clostridium butyricum	71841	2828628	1809.51	0.639714	25.3978	210.029
CD19	rCDI	CD19_bin35	684	3342	38.65	2307.59	77	0.85	Bacteria	Bacillota_A	Clostridia	Oscillospirales	Acutalibacteraceae	UMGS1071	UMGS1071 sp900541905	27959	1578390	704.224	0.446166	17.7136	146.484
CD19	rCDI	CD19_bin34	922	4470	67.03	2124.8	72.25	2.85	Bacteria	Actinomycetota	Actinomycetes	Propionibacteriales	Propionibacteriaceae	Propionibacterium	Propionibacterium freudenreichii	32828	1959064	826.863	0.422071	16.757	138.573
CD20	rCDI	CD20_bin9	39	140232	41.93	54162	100	0.19	Bacteria	Bacillota	Bacilli	Lactobacillales	Streptococcaceae	Streptococcus	Streptococcus parasanguinis_F	1123522	2112317	33489.4	15.8544	531.891	7743.94
CD20	rCDI	CD20_bin11	185	51439	38.47	10991.5	100	1.87	Bacteria	Bacillota	Bacilli	Lactobacillales	Streptococcaceae	Streptococcus	Streptococcus thermophilus	1739193	2033424	51841.1	25.4945	855.303	12452.6
CD20	rCDI	CD20_bin14	153	10382	52.18	12676.4	99.18	1.37	Bacteria	Bacillota	Bacilli	Lactobacillales	Lactobacillaceae	Limosilactobacillus	Limosilactobacillus fermentum	2818106	1939486	84000.8	43.3109	1453.02	21154.9
CD20	rCDI	CD20_bin13	91	29939	39.94	21465.2	98.91	0.54	Bacteria	Bacillota	Bacilli	Lactobacillales	Lactobacillaceae	Limosilactobacillus	Limosilactobacillus portuensis	444801	1953337	13258.4	6.78758	227.713	3315.34
CD20	rCDI	CD20_bin6	166	16554	67.27	15914	98.79	0.33	Bacteria	Actinomycetota	Actinomycetes	Propionibacteriales	Propionibacteriaceae	Propionibacterium	Propionibacterium freudenreichii	267887	2641732	7985.05	3.02266	101.406	1476.39
CD20	rCDI	CD20_bin4	101	36180	46.61	28882.3	97.83	0.5	Bacteria	Bacillota	Bacilli	Lactobacillales	Lactobacillaceae	Lacticaseibacillus	Lacticaseibacillus rhamnosus	3553850	2917116	105932	36.3138	1218.28	17737.2
CD20	rCDI	CD20_bin10	42	83356	38.66	48446.5	97.01	1.18	Bacteria	Bacillota_C	Negativicutes	Veillonellales	Veillonellaceae	Veillonella	Veillonella parvula_A	3686928	2034754	109898	54.0106	1811.98	26381.1
CD20	rCDI	CD20_bin21	12	725536	53.02	128039	94.62	0.05	Bacteria	Actinomycetota	Actinomycetes	Actinomycetales	Bifidobacteriaceae	Scardovia	Scardovia wiggsiae	122160	1536473	3641.29	2.3699	79.5068	1157.56
CD20	rCDI	CD20_bin19	92	36723	35.98	17436.1	93.46	0.7	Bacteria	Bacillota	Bacilli	Lactobacillales	Lactobacillaceae	Dellaglioa	Dellaglioa algida	122904	1604121	3663.47	2.28378	76.6177	1115.5
CD20	rCDI	CD20_bin8	356	4876	59.74	6044.85	91.17	1.6	Bacteria	Actinomycetota	Actinomycetes	Actinomycetales	Micrococcaceae	Rothia	Rothia sp001808955	61671	2151967	1838.26	0.854223	28.658	417.239
CD20	rCDI	CD20_bin20	18	354839	37.03	85596.6	88.27	0.62	Bacteria	Bacillota	Bacilli	Lactobacillales	Lactobacillaceae	Pediococcus	Pediococcus pentosaceus	595236	1540739	17742.5	11.5156	386.331	5624.7
CD20	rCDI	CD20_bin7	141	85887	34.93	15328.1	86.25	1.7	Bacteria	Bacillota	Bacilli	Lactobacillales	Streptococcaceae	Lactococcus	Lactococcus lactis	393999	2161266	11744.1	5.43392	182.3	2654.16
CD21	rCDI	CD21_bin30	92	160087	31.53	29271.5	100	1.08	Bacteria	Bacillota_I	Bacilli_A	Erysipelotrichales	Coprobacillaceae	Allocoprobacillus	Allocoprobacillus sp002160865	492097	2692973	6243.51	2.31844	182.734	1188.07
CD21	rCDI	CD21_bin2	185	57513	43.78	25190.2	100	3.77	Bacteria	Bacillota_I	Bacilli_A	Erysipelotrichales	Erysipelotrichaceae	Clostridium_AQ	Clostridium_AQ innocuum	2772794	4660180	35180	7.54906	594.997	3868.45
CD21	rCDI	CD21_bin24	64	259377	46.6	47227.1	99.46	0.4	Bacteria	Bacillota	Bacilli	Lactobacillales	Lactobacillaceae	Lacticaseibacillus	Lacticaseibacillus rhamnosus	285486	3022531	3622.12	1.19837	94.4526	614.096
CD21	rCDI	CD21_bin37	86	103325	55.46	30802.2	98.66	0.67	Bacteria	Bacillota_A	Clostridia	Oscillospirales	Acutalibacteraceae	Avimonas_A	Avimonas_A narfia	196765	2648989	2496.47	0.942422	74.2793	482.936
CD21	rCDI	CD21_bin23	279	16501	52.53	10890.4	98.32	2.74	Bacteria	Bacillota_A	Clostridia	Oscillospirales	Acutalibacteraceae	Hydrogeniiclostridium	Hydrogeniiclostridium mannosilyticum	114856	3038417	1457.24	0.479606	37.8013	245.77
CD21	rCDI	CD21_bin42	45	125184	39.8	51505	98.23	2.13	Bacteria	Bacillota_A	Clostridia	Peptostreptococcales	Anaerovoracaceae	Lentihominibacter	Lentihominibacter hominis	300352	2317726	3810.73	1.64417	129.589	842.54
CD21	rCDI	CD21_bin20	70	159088	57.74	44827.5	97.96	4.08	Bacteria	Verrucomicrobiota	Verrucomicrobiae	Verrucomicrobiales	Akkermansiaceae	Akkermansia	Akkermansia massiliensis	471329	3137924	5980.01	1.90572	150.204	976.571
CD21	rCDI	CD21_bin34	86	212765	37.7	31139.1	97.09	1.01	Bacteria	Bacillota_A	Clostridia	Monoglobales	Monoglobaceae	Monoglobus	Monoglobus pectinilyticus	674010	2677959	8551.54	3.1933	251.688	1636.38
CD21	rCDI	CD21_bin44	131	78531	43.06	16564.8	94.41	0.67	Bacteria	Bacillota_A	Clostridia	Oscillospirales	Acutalibacteraceae	Timburyella	Timburyella sp900554165	138682	2169988	1759.54	0.81085	63.9091	415.513
CD21	rCDI	CD21_bin28	135	101535	41.78	20567.7	93.85	4.03	Bacteria	Bacillota_A	Clostridia	Lachnospirales	Lachnospiraceae	Dorea_D	Dorea_D hominis	635151	2776638	8058.51	2.90226	228.748	1487.24
CD21	rCDI	CD21_bin25	148	68606	40.81	19824.5	92.83	1.75	Bacteria	Bacillota_A	Clostridia	Lachnospirales	Lachnospiraceae	Dorea	Dorea formicigenerans	1686728	2934028	21400.5	7.29388	574.885	3737.69
CD21	rCDI	CD21_bin38	128	17963	54.56	20573.3	88.37	2.01	Bacteria	Bacillota_A	Clostridia	Oscillospirales	Acutalibacteraceae	JAGZMM01	JAGZMM01 sp904420015	177651	2633384	2253.96	0.855916	67.4611	438.607
CD21	rCDI	CD21_bin9	276	37146	59.01	14144.7	88.17	1.42	Bacteria	Desulfobacterota	Desulfovibrionia	Desulfovibrionales	Desulfovibrionaceae	Bilophila	Bilophila wadsworthia	605499	3903937	7682.3	1.96783	155.1	1008.4
CD21	rCDI	CD21_bin53	394	6528	29.55	4289.82	87.33	4.18	Bacteria	Bacillota_A	Clostridia	Eubacteriales	Anaerofustaceae	Anaerofustis	Anaerofustis stercorihominis_A	38566	1690190	489.308	0.289499	22.8176	148.351
CD21	rCDI	CD21_bin5	148	192344	50.29	29017.4	86.25	1.78	Bacteria	Pseudomonadota	Gammaproteobacteria	Enterobacterales	Enterobacteriaceae	Escherichia	Escherichia coli	251828	4294577	3195.08	0.74398	58.6386	381.246
CD21	rCDI	CD21_bin46	236	11827	57.64	8873.88	83.81	3.08	Bacteria	Bacillota_A	Clostridia	Oscillospirales	Ruminococcaceae	Faecalibacterium	Faecalibacterium duncaniae	86901	2094236	1102.56	0.526474	41.4953	269.787
CD21	rCDI	CD21_bin49	91	259284	44.28	21542.5	83.56	2.35	Bacteria	Bacillota_A	Clostridia	Oscillospirales	Acutalibacteraceae	Fimenecus	Fimenecus sp000432435	424785	1960365	5389.48	2.74922	216.687	1408.82
CD21	rCDI	CD21_bin35	102	10800	40.59	26189.9	83.22	1.34	Bacteria	Bacillota_A	Clostridia	Lachnospirales	Lachnospiraceae	Eubacterium_F	Eubacterium_F sp003491505	272778	2671369	3460.89	1.29555	102.112	663.892
CD21	rCDI	CD21_bin43	554	10111	57.37	4041.88	80.29	4.53	Bacteria	Bacillota_A	Clostridia	Oscillospirales	Oscillospiraceae	Evtepia	Evtepia gabavorous	103748	2239202	1316.31	0.587847	46.3326	301.237
CD21	rCDI	CD21_bin56	267	15328	62.65	5737.71	77.96	0.12	Bacteria	Actinomycetota	Coriobacteriia	Coriobacteriales	Atopobiaceae	Parolsenella	Parolsenella sp900544655	37631	1531969	477.445	0.311655	24.5638	159.705
CD21	rCDI	CD21_bin47	92	5724	42.96	21907.4	72.26	0	Bacteria	Bacillota_A	Clostridia	Lachnospirales	Lachnospiraceae	Blautia_A	Blautia_A sp900120195	124693	2015484	1582.05	0.784948	61.8675	402.24
CD22	rCDI	CD22_bin20	43	205988	58.08	81430.4	100	0.1	Bacteria	Bacteroidota	Bacteroidia	Bacteroidales	Rikenellaceae	Alistipes	Alistipes finegoldii	255339	3501506	2364.84	0.675379	72.9226	1013.6
CD22	rCDI	CD22_bin57	118	106354	46.52	20257.1	100	0.65	Bacteria	Bacillota_C	Negativicutes	Acidaminococcales	Acidaminococcaceae	Phascolarctobacterium_A	Phascolarctobacterium_A succinatutens_B	132142	2390340	1223.84	0.511996	55.2817	768.397
CD22	rCDI	CD22_bin23	143	90204	38.29	23499.4	100	4.03	Bacteria	Bacillota_A	Clostridia	Lachnospirales	Lachnospiraceae	Anaerobutyricum	Anaerobutyricum hallii	566683	3360418	5248.38	1.56182	168.635	2343.96
CD22	rCDI	CD22_bin44	49	10101	61	56182.8	99.56	1.53	Bacteria	Actinomycetota	Actinomycetes	Mycobacteriales	Mycobacteriaceae	Corynebacterium	Corynebacterium hesseae	228390	2752957	2115.25	0.768357	82.9617	1153.14
CD22	rCDI	CD22_bin35	112	36887	42.22	26107	99.42	0.88	Bacteria	Bacillota_A	Clostridia	Lachnospirales	Lachnospiraceae	Bariatricus	Bariatricus comes	345108	2923990	3196.25	1.09311	118.026	1640.53
CD22	rCDI	CD22_bin31	241	23275	41.53	12817.4	99.42	1.75	Bacteria	Bacillota_A	Clostridia	Lachnospirales	Lachnospiraceae	Mediterraneibacter	Mediterraneibacter torques	329096	3088985	3047.95	0.986716	106.539	1480.85
CD22	rCDI	CD22_bin21	290	9618	36.4	11915.6	99.33	3.6	Bacteria	Bacillota_A	Clostridia	Lachnospirales	Lachnospiraceae	Anaerostipes	Anaerostipes hadrus	221248	3455538	2049.11	0.592992	64.0271	889.955
CD22	rCDI	CD22_bin12	123	70663	46.61	40463.2	99.26	2.52	Bacteria	Bacteroidota	Bacteroidia	Bacteroidales	Bacteroidaceae	Bacteroides	Bacteroides uniformis	2705609	4976972	25058.2	5.03483	543.626	7556.21
CD22	rCDI	CD22_bin10	119	174045	42.06	47056.6	99.25	3.24	Bacteria	Bacteroidota	Bacteroidia	Bacteroidales	Bacteroidaceae	Phocaeicola	Phocaeicola dorei	3918355	5599730	36290.2	6.4807	699.74	9726.15
CD22	rCDI	CD22_bin41	100	259986	29.45	27955.5	99.06	1.89	Bacteria	Bacillota_I	Bacilli_A	Erysipelotrichales	Coprobacillaceae	Faecalibacillus	Faecalibacillus intestinalis	414948	2795555	3843.08	1.37471	148.431	2063.15
CD22	rCDI	CD22_bin22	366	15362	42.62	9403.08	99.06	4.51	Bacteria	Bacillota_A	Clostridia	Lachnospirales	Lachnospiraceae	Ruminococcus_B	Ruminococcus_B gnavus	215820	3441528	1998.84	0.580799	62.7105	871.655
CD22	rCDI	CD22_bin60	105	82277	34.34	21572.1	98.66	1.34	Bacteria	Bacillota_A	Clostridia	Oscillospirales	Acutalibacteraceae	Ruminococcus_E	Ruminococcus_E sp934476515	1153536	2265067	10683.6	4.71667	509.272	7078.71
CD22	rCDI	CD22_bin36	106	85981	37.51	27565.8	98.64	3.75	Bacteria	Bacillota_A	Clostridia	Lachnospirales	Lachnospiraceae	Lachnospira	Lachnospira eligens_A	669503	2921979	6200.66	2.12207	229.127	3184.78
CD22	rCDI	CD22_bin50	469	7368	27.35	5631.97	98.59	2.11	Bacteria	Bacillota_A	Clostridia	Peptostreptococcales	Peptostreptococcaceae	Romboutsia	Romboutsia timonensis	114575	2641392	1061.15	0.401737	43.3767	602.922
CD22	rCDI	CD22_bin27	266	21592	48.54	11701.5	98.58	3.8	Bacteria	Bacillota_A	Clostridia	Lachnospirales	Lachnospiraceae	Alitiscatomonas	Alitiscatomonas sp900066535	158481	3112589	1467.79	0.471564	50.9161	707.717
CD22	rCDI	CD22_bin28	197	7945	42.93	15773.9	97.8	1.54	Bacteria	Bacillota_A	Clostridia	Lachnospirales	Lachnospiraceae	Eubacterium_I	Eubacterium_I ramulus	203759	3107450	1887.13	0.607293	65.5711	911.416
CD22	rCDI	CD22_bin43	195	7010	40.6	14283.9	97.76	1.01	Bacteria	Bacillota_A	Clostridia	Lachnospirales	Lachnospiraceae	Eubacterium_F	Eubacterium_F sp003491505	131444	2785365	1217.38	0.437063	47.1909	655.938
CD22	rCDI	CD22_bin19	165	154579	46.84	22863.9	97.68	2.52	Bacteria	Bacillota_A	Clostridia	Lachnospirales	Lachnospiraceae	Fusicatenibacter	Fusicatenibacter saccharivorans	683271	3772544	6328.17	1.67743	181.117	2517.46
CD22	rCDI	CD22_bin40	123	119311	40.66	22754.8	97.08	3.22	Bacteria	Bacillota_A	Clostridia	Lachnospirales	Lachnospiraceae	Dorea	Dorea formicigenerans	209143	2798838	1937	0.692071	74.7249	1038.65
CD22	rCDI	CD22_bin69	76	94837	38.76	23981.5	96.63	3.75	Bacteria	Bacillota	Bacilli	Lactobacillales	Streptococcaceae	Streptococcus	Streptococcus thermophilus	425738	1822598	3943.01	2.1634	233.589	3246.8
CD22	rCDI	CD22_bin48	113	127119	48.45	23715.4	95.62	0.73	Bacteria	Pseudomonadota	Gammaproteobacteria	Burkholderiales	Burkholderiaceae	Parasutterella	Parasutterella excrementihominis	143840	2679839	1332.19	0.497114	53.6749	746.062
CD22	rCDI	CD22_bin52	214	47570	59.67	12133.1	95.62	4.96	Bacteria	Actinomycetota	Actinomycetes	Actinomycetales	Bifidobacteriaceae	Bifidobacterium	Bifidobacterium longum	494764	2596482	4582.3	1.76481	190.552	2648.6
CD22	rCDI	CD22_bin17	160	25022	41.14	24260.1	95.57	1.58	Bacteria	Bacillota_A	Clostridia	Lachnospirales	Lachnospiraceae	Anthropogastromicrobium	Anthropogastromicrobium aceti	708736	3881612	6564.02	1.69105	182.588	2537.91
CD22	rCDI	CD22_bin24	179	36367	48.58	18426.5	95.25	1.69	Bacteria	Bacillota_A	Clostridia	Lachnospirales	Lachnospiraceae	Brotaphodocola	Brotaphodocola sp003478505	282460	3298343	2616.03	0.793134	85.6369	1190.32
CD22	rCDI	CD22_bin47	176	46709	41.44	15232.9	94.74	2.48	Bacteria	Bacillota_A	Clostridia	Lachnospirales	Lachnospiraceae	Dorea_D	Dorea_D hominis	148143	2680993	1372.04	0.511765	55.2568	768.05
CD22	rCDI	CD22_bin16	232	9966	41.19	17437	93.88	1.9	Bacteria	Bacillota_A	Clostridia	Lachnospirales	Lachnospiraceae	Blautia_A	Blautia_A wexlerae	1441997	4045389	13355.2	3.30133	356.454	4954.6
CD22	rCDI	CD22_bin38	328	69653	48.71	8653.47	93.38	2.95	Bacteria	Bacillota_A	Clostridia	Lachnospirales	Lachnospiraceae	Otoolea	Otoolea fessa	135242	2838339	1252.56	0.441299	47.6483	662.295
CD22	rCDI	CD22_bin51	416	6979	44.85	6313.37	92.06	1.34	Bacteria	Bacillota_A	Clostridia	Oscillospirales	Ruminococcaceae	Ruminiclostridium_E	Ruminiclostridium_E siraeum	101014	2626362	935.55	0.356215	38.4616	534.603
CD22	rCDI	CD22_bin29	157	138006	41.16	19791	87.74	1.93	Bacteria	Bacillota_A	Clostridia	Lachnospirales	Lachnospiraceae	Agathobacter	Agathobacter rectalis	2672366	3107182	24750.3	7.96553	860.061	11954.6
CD22	rCDI	CD22_bin63	273	24683	58.73	7860.6	87.15	0.3	Bacteria	Actinomycetota	Actinomycetes	Mycobacteriales	Mycobacteriaceae	Corynebacterium	Corynebacterium amycolatum	80392	2145943	744.557	0.34696	37.4623	520.714
CD22	rCDI	CD22_bin39	594	6890	42.02	4727.2	85.96	2.64	Bacteria	Bacillota_A	Clostridia	Lachnospirales	Lachnospiraceae	Blautia_A	Blautia_A obeum	105170	2807956	974.041	0.346886	37.4543	520.602
CD22	rCDI	CD22_bin58	614	1778	38.29	3862.3	83.89	2.01	Bacteria	Bacillota_A	Clostridia	UBA1381	UBA1381	Hominilimicola	Hominilimicola fabiformis	76166	2371450	705.418	0.297463	32.1179	446.428
CD22	rCDI	CD22_bin32	173	59431	38.87	17670.9	83.54	3.48	Bacteria	Bacillota_A	Clostridia	Lachnospirales	Lachnospiraceae	Blautia	Blautia stercoris	400547	3057061	3709.7	1.21349	131.024	1821.18
CD22	rCDI	CD22_bin59	453	1987	52.28	5142.81	80.91	0.95	Bacteria	Bacillota_A	Clostridia	Lachnospirales	Lachnospiraceae	Alitiscatomonas	Alitiscatomonas aceti	80806	2329695	748.392	0.32124	34.6852	482.113
CD22	rCDI	CD22_bin78	463	2889	57.51	3293.4	72.91	0.38	Bacteria	Actinomycetota	Coriobacteriia	Coriobacteriales	Eggerthellaceae	Slackia	Slackia piriformis	43820	1524844	405.843	0.266154	28.7374	399.44
CD23	rCDI	CD23_bin7	56	152965	38.69	70539.1	100	0.9	Bacteria	Pseudomonadota	Gammaproteobacteria	Enterobacterales	Enterobacteriaceae	Proteus	Proteus mirabilis	574228	3950187	12362.8	3.12966	145.367	859.575
CD23	rCDI	CD23_bin21	34	287316	55.68	61539.8	99.53	0.53	Bacteria	Bacillota_C	Negativicutes	Selenomonadales	Selenomonadaceae	Centipeda	Centipeda noxia	897918	2092353	19331.6	9.23916	429.143	2537.57
CD23	rCDI	CD23_bin10	60	85337	46.34	48320.9	99.46	2.17	Bacteria	Bacillota	Bacilli	Lactobacillales	Lactobacillaceae	Lacticaseibacillus	Lacticaseibacillus paracasei	929489	2899254	20011.3	6.90222	320.596	1895.72
CD23	rCDI	CD23_bin24	152	15273	60.48	12580.1	98.81	0.74	Bacteria	Actinomycetota	Actinomycetes	Actinomycetales	Bifidobacteriaceae	Bifidobacterium	Bifidobacterium animalis_B	61752	1912171	1329.48	0.695273	32.2942	190.96
CD23	rCDI	CD23_bin19	34	12157	49.43	64839.2	98.14	2.48	Bacteria	Pseudomonadota	Gammaproteobacteria	Burkholderiales	Burkholderiaceae	Sutterella	Sutterella sp900762445	1946141	2204531	41899.1	19.0059	882.791	5220.05
CD23	rCDI	CD23_bin4	125	163678	59.73	35075.7	97.04	0.59	Bacteria	Desulfobacterota	Desulfovibrionia	Desulfovibrionales	Desulfovibrionaceae	Bilophila	Bilophila wadsworthia	2352848	4384461	50655.3	11.5534	536.633	3173.18
CD23	rCDI	CD23_bin8	80	117067	50.65	49207.3	94.57	0.6	Bacteria	Pseudomonadota	Gammaproteobacteria	Enterobacterales	Enterobacteriaceae	Morganella	Morganella morganii_B	736613	3936585	15858.8	4.02857	187.12	1106.46
CD23	rCDI	CD23_bin20	154	9788	55.56	14183.5	94.03	1.19	Bacteria	Pseudomonadota	Gammaproteobacteria	Burkholderiales	Neisseriaceae	Eikenella	Eikenella corrodens	71381	2184264	1536.79	0.703572	32.6797	193.239
CD23	rCDI	CD23_bin11	258	20171	35.14	9758.92	93.38	1.54	Bacteria	Bacillota	Bacilli	Lactobacillales	Streptococcaceae	Lactococcus	Lactococcus lactis	1889869	2517802	40687.6	16.16	750.603	4438.41
CD23	rCDI	CD23_bin12	680	5988	47.06	3690.01	90.86	2.77	Bacteria	Bacillota	Bacilli	Lactobacillales	Lactobacillaceae	Lacticaseibacillus	Lacticaseibacillus rhamnosus	59506	2509207	1281.13	0.51057	23.7151	140.23
CD23	rCDI	CD23_bin23	633	2382	57.43	3033.82	89.85	3.2	Bacteria	Bacillota_C	Negativicutes	Selenomonadales	Selenomonadaceae	Centipeda	Centipeda artemidis	38563	1920407	830.236	0.432323	20.0806	118.739
CD23	rCDI	CD23_bin16	161	53907	39.19	13922.1	89.35	2.4	Bacteria	Bacillota	Bacilli	Lactobacillales	Streptococcaceae	Streptococcus	Streptococcus sp001556435	328735	2241453	7077.45	3.15753	146.662	867.228
CD23	rCDI	CD23_bin30	368	4404	34.98	3020.86	85.12	3.67	Bacteria	Bacillota	Bacilli	Lactobacillales	Lactobacillaceae	Fructilactobacillus	Fructilactobacillus sanfranciscensis	33436	1111677	719.855	0.64754	30.0771	177.85
CD23	rCDI	CD23_bin25	427	1677	38.82	4383.95	84.58	3.92	Bacteria	Bacillota	Bacilli	Lactobacillales	Streptococcaceae	Lactococcus_A	Lactococcus_A paracarnosus	48401	1871945	1042.04	0.556663	25.856	152.89
CD23	rCDI	CD23_bin5	105	196212	53.79	40423.7	80.45	2.18	Bacteria	Pseudomonadota	Gammaproteobacteria	Enterobacterales	Enterobacteriaceae	Kosakonia	Kosakonia sp000410515	426005	4244489	9171.61	2.16083	100.367	593.48
CD23	rCDI	CD23_bin29	431	3030	50.58	2932.48	78.73	0.94	Bacteria	Bacillota	Bacilli	Lactobacillales	Lactobacillaceae	Lactobacillus	Lactobacillus delbrueckii	25303	1263899	544.757	0.431013	20.0198	118.38
CD23	rCDI	CD23_bin26	155	76886	32.77	9515.79	75.19	1.5	Bacteria	Bacillota	Bacilli	Lactobacillales	Lactobacillaceae	Ligilactobacillus	Ligilactobacillus salivarius	45614	1474947	982.04	0.665813	30.9259	182.868
CD24	rCDI	CD24_bin26	26	110729	36.81	75828	100	0.75	Bacteria	Bacillota	Bacilli	Lactobacillales	Streptococcaceae	Streptococcus	Streptococcus mutans	204887	1971528	3544.46	1.79783	103.923	407.634
CD24	rCDI	CD24_bin23	37	76124	38.65	57032.6	100	1.9	Bacteria	Bacillota_C	Negativicutes	Veillonellales	Veillonellaceae	Veillonella	Veillonella parvula_A	698905	2110206	12090.8	5.72967	331.202	1299.13
CD24	rCDI	CD24_bin9	60	218948	54.11	64749.1	99.91	3.16	Bacteria	Bacillota_C	Negativicutes	Sporomusales_A	Acetonemaceae	Anaerosporomusa	Anaerosporomusa sp900542835	222031	3884944	3841.05	0.988701	57.1517	224.175
CD24	rCDI	CD24_bin28	46	69947	60.48	41743.3	99.56	0	Bacteria	Actinomycetota	Actinomycetes	Actinomycetales	Bifidobacteriaceae	Bifidobacterium	Bifidobacterium animalis_B	139785	1920194	2418.22	1.25936	72.7973	285.545
CD24	rCDI	CD24_bin31	47	114444	38.28	38389.1	99.35	1.31	Bacteria	Bacillota	Bacilli	Lactobacillales	Lactobacillaceae	Lapidilactobacillus	Lapidilactobacillus dextrinicus	978428	1804289	16926.4	9.38121	542.279	2127.07
CD24	rCDI	CD24_bin30	37	93781	41.21	49771.7	99.3	0.26	Bacteria	Bacillota	Bacilli	Lactobacillales	Lactobacillaceae	Ligilactobacillus	Ligilactobacillus animalis	3250220	1841552	56227.5	30.5327	1764.94	6922.9
CD24	rCDI	CD24_bin11	293	100880	43.65	13013.6	99.07	4.09	Bacteria	Bacillota	Bacilli	Lactobacillales	Lactobacillaceae	Lactiplantibacillus	Lactiplantibacillus plantarum	3666503	3812979	63429	16.635	961.585	3771.78
CD24	rCDI	CD24_bin25	31	121003	34.56	63690.6	98.94	0	Bacteria	Bacillota	Bacilli	Lactobacillales	Lactobacillaceae	Lactobacillus	Lactobacillus acidophilus	1025276	1974409	17736.9	8.98338	519.282	2036.87
CD24	rCDI	CD24_bin12	375	84600	45.67	10036.4	98.91	3.94	Bacteria	Bacillota	Bacilli	Lactobacillales	Lactobacillaceae	Lacticaseibacillus	Lacticaseibacillus paracasei	1534449	3763643	26545.4	7.0531	407.703	1599.2
CD24	rCDI	CD24_bin24	34	36879	34.81	59071.7	98.67	1.56	Bacteria	Bacillota_I	Bacilli_A	Acholeplasmatales	Anaeroplasmataceae	Pelethenecus	Pelethenecus sp900540705	237129	2008437	4102.24	2.0425	118.066	463.111
CD24	rCDI	CD24_bin19	200	226005	59.88	11558	98.14	0.86	Bacteria	Actinomycetota	Actinomycetes	Actinomycetales	Bifidobacteriaceae	Bifidobacterium	Bifidobacterium longum	75662	2311595	1308.92	0.566242	32.7315	128.388
CD24	rCDI	CD24_bin22	201	28255	52.05	10511.2	98.09	0.82	Bacteria	Bacillota	Bacilli	Lactobacillales	Lactobacillaceae	Limosilactobacillus	Limosilactobacillus fermentum	321831	2112762	5567.55	2.6352	152.327	597.498
CD24	rCDI	CD24_bin18	332	6783	65.13	7348.32	97.24	3.2	Bacteria	Actinomycetota	Actinomycetes	Actinomycetales	Actinomycetaceae	Pauljensenia	Pauljensenia sp916439125	69053	2439641	1194.59	0.489658	28.3046	111.024
CD24	rCDI	CD24_bin27	278	5960	37.63	6928.96	97.21	3.01	Bacteria	Bacillota	Bacilli	Lactobacillales	Lactobacillaceae	Leuconostoc	Leuconostoc mesenteroides	62533	1926250	1081.8	0.561607	32.4636	127.337
CD24	rCDI	CD24_bin7	70	412494	58.52	65075.6	96.75	1.01	Bacteria	Pseudomonadota	Gammaproteobacteria	Pseudomonadales	Pseudomonadaceae	Pseudomonas_E	Pseudomonas_E lundensis	4126503	4555293	71386.9	15.6712	905.87	3553.24
CD24	rCDI	CD24_bin21	65	78763	40.21	32650.2	96.53	1.04	Bacteria	Bacillota	Bacilli	Lactobacillales	Streptococcaceae	Streptococcus	Streptococcus gordonii	265777	2122262	4597.84	2.16648	125.233	491.222
CD24	rCDI	CD24_bin32	49	86131	41.3	36458	95.86	1.03	Bacteria	Bacillota	Bacilli	Lactobacillales	Streptococcaceae	Streptococcus	Streptococcus oralis_BW	150845	1786441	2609.56	1.46076	84.4388	331.208
CD24	rCDI	CD24_bin10	84	63586	51.04	45416.6	95.65	0.43	Bacteria	Pseudomonadota	Gammaproteobacteria	Enterobacterales	Enterobacteriaceae	Morganella	Morganella morganii	172696	3814993	2987.57	0.783113	45.2677	177.561
CD24	rCDI	CD24_bin15	448	23296	46.7	6673.77	95.26	4.4	Bacteria	Bacillota	Bacilli	Lactobacillales	Lactobacillaceae	Lacticaseibacillus	Lacticaseibacillus rhamnosus	1230521	2989847	21287.5	7.11994	411.567	1614.36
CD24	rCDI	CD24_bin29	30	684232	50.99	62290.4	93.55	0.03	Bacteria	Bacillota_A	Clostridia	Christensenellales	Borkfalkiaceae	Gallimonas	Gallimonas sp910586245	129901	1868711	2247.24	1.20256	69.5137	272.665
CD24	rCDI	CD24_bin33	536	1354	56.11	3064.24	87.7	3.84	Bacteria	Actinomycetota	Actinomycetes	Actinomycetales	Actinomycetaceae	Pauljensenia	Pauljensenia sp000308055	32931	1642430	569.693	0.34686	20.0502	78.6461
CD24	rCDI	CD24_bin34	25	84814	32.9	56492.5	72.25	0.87	Bacteria	Bacillota	Bacilli	Lactobacillales	Lactobacillaceae	Ligilactobacillus	Ligilactobacillus salivarius	1579313	1412312	27321.5	19.3452	1118.25	4386.28
CD24	rCDI	CD24_bin36	421	1867	44.18	2924.24	71.11	2.43	Bacteria	Bacillota	Bacilli	Lactobacillales	Lactobacillaceae	Weissella	Weissella soli	25470	1231106	440.621	0.357906	20.6887	81.1507
CD24	rCDI	CD24_bin5	280	98074	56.76	17342.4	70.85	2.59	Bacteria	Pseudomonadota	Gammaproteobacteria	Enterobacterales	Enterobacteriaceae	Klebsiella	Klebsiella pneumoniae	1035183	4855868	17908.3	3.68796	213.182	836.198
CD25	rCDI	CD25_bin11	82	282120	55.01	35879.7	100	0	Bacteria	Pseudomonadota	Gammaproteobacteria	Burkholderiales	Burkholderiaceae	Sutterella	Sutterella wadsworthensis	2152898	2942137	56167.9	19.0908	731.746	11446.7
CD25	rCDI	CD25_bin15	44	70712	49.64	54266.5	100	0	Bacteria	Bacillota_C	Negativicutes	Acidaminococcales	Acidaminococcaceae	Acidaminococcus	Acidaminococcus intestini	892354	2387727	23281	9.75028	373.725	5846.2
CD25	rCDI	CD25_bin5	87	71976	43.7	48031	100	1.89	Bacteria	Bacillota_I	Bacilli_A	Erysipelotrichales	Erysipelotrichaceae	Clostridium_AQ	Clostridium_AQ innocuum	819201	4178695	21372.5	5.11463	196.042	3066.7
CD25	rCDI	CD25_bin17	57	167041	40.81	38087.2	99.48	0.52	Bacteria	Bacillota	Bacilli	Lactobacillales	Lactobacillaceae	Ligilactobacillus	Ligilactobacillus animalis	3199879	2170972	83483	38.4542	1473.94	23056.9
CD25	rCDI	CD25_bin12	119	3704	46.32	24465.5	99.46	1.43	Bacteria	Bacillota	Bacilli	Lactobacillales	Lactobacillaceae	Lacticaseibacillus	Lacticaseibacillus paracasei	470346	2911395	12271.1	4.21484	161.553	2527.19
CD25	rCDI	CD25_bin14	260	12698	41.37	9315.03	99.38	2.41	Bacteria	Bacillota	Bacilli	Lactobacillales	Lactobacillaceae	Pediococcus	Pediococcus acidilactici	1857816	2421908	48469.4	20.0129	767.088	11999.6
CD25	rCDI	CD25_bin20	67	149202	46.89	30524.2	99.18	4.71	Bacteria	Bacillota	Bacilli	Lactobacillales	Lactobacillaceae	Limosilactobacillus	Limosilactobacillus mucosae	1637117	2045119	42711.4	20.8846	800.5	12522.3
CD25	rCDI	CD25_bin7	130	91468	46.45	27304.8	98.73	3	Bacteria	Bacillota	Bacilli	Lactobacillales	Lactobacillaceae	Lactiplantibacillus	Lactiplantibacillus pentosus	894873	3549626	23346.7	6.57724	252.103	3943.67
CD25	rCDI	CD25_bin23	232	16277	45.02	8192.41	98.2	4.04	Bacteria	Bacillota_C	Negativicutes	Veillonellales	Megasphaeraceae	Anaeroglobus	Anaeroglobus micronuciformis	102589	1900638	2676.49	1.40821	53.9761	844.35
CD25	rCDI	CD25_bin24	41	541904	45.28	45966.6	98.1	0.63	Bacteria	Bacillota_C	Negativicutes	Veillonellales	Dialisteraceae	Dialister	Dialister invisus	518355	1884631	13523.6	7.17572	275.043	4302.51
CD25	rCDI	CD25_bin4	189	25844	59.6	22509	97.46	0	Bacteria	Desulfobacterota	Desulfovibrionia	Desulfovibrionales	Desulfovibrionaceae	Bilophila	Bilophila wadsworthia	353888	4254205	9232.74	2.17026	83.1855	1301.27
CD25	rCDI	CD25_bin13	60	145226	45.17	45775.5	97.32	0	Bacteria	Bacillota_A	Clostridia	Lachnospirales	Anaerotignaceae	Anaerotignum	Anaerotignum sp001304995	972819	2746529	25380.3	9.24086	354.199	5540.76
CD25	rCDI	CD25_bin8	55	51487	50.56	63227.5	97.14	3.17	Bacteria	Bacillota_I	Bacilli_A	Erysipelotrichales	Erysipelotrichaceae	Holdemania	Holdemania sp900120005	484107	3477513	12630.1	3.63193	139.211	2177.68
CD25	rCDI	CD25_bin2	121	7392	49.64	42974	95.66	3.16	Bacteria	Bacillota_A	Clostridia	Lachnospirales	Lachnospiraceae	AF33-28	AF33-28 sp003477885	367188	5199858	9579.72	1.84231	70.615	1104.63
CD25	rCDI	CD25_bin10	91	8810	44.78	32644.4	95.49	3.22	Bacteria	Bacillota	Bacilli	Lactobacillales	Lactobacillaceae	Lactiplantibacillus	Lactiplantibacillus plantarum	340710	2970637	8888.93	2.99226	114.693	1794.14
CD25	rCDI	CD25_bin21	268	4390	38.56	7502.63	93.07	4.84	Bacteria	Bacillota_C	Negativicutes	Veillonellales	Veillonellaceae	Veillonella	Veillonella parvula_A	653984	2010705	17062.1	8.48561	325.251	5087.92
CD25	rCDI	CD25_bin3	107	65426	57.61	46106.9	91.53	1.25	Bacteria	Pseudomonadota	Gammaproteobacteria	Enterobacterales	Enterobacteriaceae	Klebsiella	Klebsiella pneumoniae	435543	4933440	11363.1	2.30327	88.2838	1381.03
CD25	rCDI	CD25_bin22	305	2122	38.55	6256.41	88.23	3.36	Bacteria	Bacillota_C	Negativicutes	Veillonellales	Veillonellaceae	Veillonella	Veillonella nakazawae	181729	1908204	4741.21	2.48464	95.2356	1489.78
CD25	rCDI	CD25_bin6	215	97499	50.71	17067.5	77.27	2.07	Bacteria	Pseudomonadota	Gammaproteobacteria	Enterobacterales	Enterobacteriaceae	Escherichia	Escherichia coli	792945	3669516	20687.5	5.63766	216.09	3380.3
CD26	rCDI	CD26_bin25	34	64923	45.38	51115.8	100	0	Bacteria	Bacillota_C	Negativicutes	Veillonellales	Megasphaeraceae	Anaeroglobus	Anaeroglobus micronuciformis	684623	1737937	20317.4	11.6905	393.929	1590.68
CD26	rCDI	CD26_bin21	69	63523	39.03	30633.2	100	0.4	Bacteria	Bacillota_C	Negativicutes	Veillonellales	Veillonellaceae	Veillonella	Veillonella atypica	1661130	2113691	49297	23.3227	785.891	3173.43
CD26	rCDI	CD26_bin15	118	98426	35.01	21018.8	100	4.39	Bacteria	Bacillota	Bacilli	Lactobacillales	Streptococcaceae	Lactococcus	Lactococcus lactis	313734	2480215	9310.61	3.75395	126.495	510.785
CD26	rCDI	CD26_bin7	66	113431	38.9	61287.1	100	4.44	Bacteria	Pseudomonadota	Gammaproteobacteria	Enterobacterales	Enterobacteriaceae	Proteus	Proteus mirabilis	1177870	4044949	34955.4	8.64173	291.195	1175.85
CD26	rCDI	CD26_bin11	122	101901	46.68	23997.3	99.46	0.53	Bacteria	Bacillota	Bacilli	Lactobacillales	Lactobacillaceae	Lacticaseibacillus	Lacticaseibacillus rhamnosus	122662	2927668	3640.21	1.24338	41.8975	169.182
CD26	rCDI	CD26_bin14	22	691749	44.15	113820	99.4	2.15	Bacteria	Bacillota_C	Negativicutes	Acidaminococcales	Acidaminococcaceae	Phascolarctobacterium	Phascolarctobacterium faecium	848280	2504046	25174.2	10.0534	338.764	1367.93
CD26	rCDI	CD26_bin22	14	89916	42.12	140464	99.38	0	Bacteria	Bacillota	Bacilli	Lactobacillales	Lactobacillaceae	Pediococcus	Pediococcus acidilactici	749361	1966492	22238.6	11.3088	381.065	1538.74
CD26	rCDI	CD26_bin18	68	104726	26.98	33584.8	97.75	0	Bacteria	Fusobacteriota	Fusobacteriia	Fusobacteriales	Fusobacteriaceae	Fusobacterium	Fusobacterium animalis	1603139	2283764	47576	20.8323	701.972	2834.56
CD26	rCDI	CD26_bin17	123	59858	59.46	18933.5	97.46	0.66	Bacteria	Actinomycetota	Actinomycetes	Actinomycetales	Micrococcaceae	Rothia	Rothia mucilaginosa	230916	2328826	6852.84	2.94261	99.1555	400.39
CD26	rCDI	CD26_bin6	161	45056	52.17	27526.7	94.87	1.92	Bacteria	Pseudomonadota	Gammaproteobacteria	Enterobacterales	Enterobacteriaceae	Symbiopectobacterium	Unclassified_Symbiopectobacterium	182806	4431802	5425.09	1.22413	41.2487	166.562
CD26	rCDI	CD26_bin27	327	13506	39.28	5224.28	94.3	3.16	Bacteria	Bacillota	Bacilli	Lactobacillales	Aerococcaceae	Granulicatella	Granulicatella sp001058355	52230	1708340	1550.02	0.907324	30.5735	123.456
CD26	rCDI	CD26_bin16	32	213187	35.36	76542.6	93.58	1.27	Bacteria	Bacillota_C	Negativicutes	Selenomonadales	ICN-92133	Selenobaculum	Selenobaculum gbiensis	253219	2449364	7514.72	3.06803	103.382	417.454
CD26	rCDI	CD26_bin24	93	71304	29.56	18754.9	93.46	3.47	Bacteria	Bacillota	Bacilli	Staphylococcales	Gemellaceae	Gemella	Gemella sanguinis	69600	1744203	2065.5	1.18421	39.9036	161.131
CD26	rCDI	CD26_bin28	38	1268	41.21	44542.2	91.27	2.91	Bacteria	Bacillota	Bacilli	Lactobacillales	Lactobacillaceae	Ligilactobacillus	Ligilactobacillus animalis	3229358	1692605	95836.9	56.6209	1907.92	7704.19
CD26	rCDI	CD26_bin12	34	31774	44.49	84285.9	89.51	1.54	Bacteria	Bacillota	Bacilli	Lactobacillales	Lactobacillaceae	Lactiplantibacillus	Lactiplantibacillus plantarum	1648760	2865719	48929.9	17.0742	575.339	2323.22
CD26	rCDI	CD26_bin9	564	6725	37.67	6591.96	89.05	1.42	Bacteria	Pseudomonadota	Gammaproteobacteria	Enterobacterales	Enterobacteriaceae	Proteus	Proteus terrae	117655	3717867	3491.62	0.939146	31.6458	127.786
CD26	rCDI	CD26_bin19	841	5245	38.02	2588.85	77.25	2.29	Bacteria	Bacillota_A	Clostridia	Lachnospirales	Lachnospiraceae	Lachnoanaerobaculum	Lachnoanaerobaculum orale	43269	2177221	1284.08	0.589781	19.8735	80.2492
CD27	rCDI	CD27_bin22	27	144360	38.74	76977	100	0.16	Bacteria	Bacillota_C	Negativicutes	Veillonellales	Veillonellaceae	Veillonella	Veillonella sp018376995	3554973	2078379	65437.9	31.4851	1710.45	6058.05
CD27	rCDI	CD27_bin4	27	642700	51.13	143508	100	0.18	Bacteria	Pseudomonadota	Gammaproteobacteria	Enterobacterales	Enterobacteriaceae	Morganella	Morganella morganii	2025996	3874721	37293.4	9.62479	522.875	1851.91
CD27	rCDI	CD27_bin16	69	53049	26.94	34424	100	1.12	Bacteria	Fusobacteriota	Fusobacteriia	Fusobacteriales	Fusobacteriaceae	Fusobacterium	Fusobacterium animalis	159777	2375253	2941.09	1.23822	67.2674	238.246
CD27	rCDI	CD27_bin17	37	83682	59.08	60657.2	100	1.91	Bacteria	Actinomycetota	Actinomycetes	Actinomycetales	Bifidobacteriaceae	Bifidobacterium	Bifidobacterium adolescentis	159374	2244316	2933.67	1.30715	71.0123	251.51
CD27	rCDI	CD27_bin20	30	193077	62.73	71882.2	99.54	1.23	Bacteria	Actinomycetota	Actinomycetes	Actinomycetales	Bifidobacteriaceae	Bifidobacterium	Bifidobacterium bifidum	1067192	2156466	19644.3	9.10947	494.88	1752.76
CD27	rCDI	CD27_bin14	27	355709	35.32	96107.3	99.37	1.27	Bacteria	Bacillota_C	Negativicutes	Selenomonadales	ICN-92133	Selenobaculum	Selenobaculum gbiensis	2043329	2594896	37612.5	14.4948	787.442	2788.94
CD27	rCDI	CD27_bin9	91	68508	42.77	35383.8	98.83	2.34	Bacteria	Bacillota_A	Clostridia	Lachnospirales	Lachnospiraceae	Ruminococcus_B	Ruminococcus_B gnavus	1637078	3219929	30134.4	9.35872	508.421	1800.71
CD27	rCDI	CD27_bin19	93	11690	41.71	23303.7	98.77	3.64	Bacteria	Bacillota	Bacilli	Lactobacillales	Lactobacillaceae	Pediococcus	Pediococcus acidilactici	3367681	2167239	61990.4	28.6034	1553.9	5503.58
CD27	rCDI	CD27_bin8	124	16448	41.58	28154.4	98.25	2.55	Bacteria	Bacillota_A	Clostridia	Lachnospirales	Lachnospiraceae	Blautia_A	Blautia_A wexlerae	579921	3491143	10674.9	3.0577	166.112	588.332
CD27	rCDI	CD27_bin24	33	543195	45.26	58067.1	98.1	0.63	Bacteria	Bacillota_C	Negativicutes	Veillonellales	Dialisteraceae	Dialister	Dialister invisus	2738392	1916214	50406.8	26.3054	1429.06	5061.43
CD27	rCDI	CD27_bin12	40	15028	46.52	74521.1	97.28	1.27	Bacteria	Bacillota	Bacilli	Lactobacillales	Lactobacillaceae	Lacticaseibacillus	Lacticaseibacillus rhamnosus	359490	2980846	6617.29	2.21994	120.6	427.138
CD27	rCDI	CD27_bin10	234	21878	45.84	13439.5	97.13	1.86	Bacteria	Bacteroidota	Bacteroidia	Bacteroidales	Bacteroidaceae	Prevotella	Prevotella copri_B	6056781	3144841	111490	35.4517	1925.94	6821.26
CD27	rCDI	CD27_bin27	28	5380	50.02	63455.9	97.01	0.3	Bacteria	Bacillota_C	Negativicutes	Veillonellales	Megasphaeraceae	Anaeroglobus	Anaeroglobus massiliensis	1659709	1776766	30551	17.1947	934.118	3308.44
CD27	rCDI	CD27_bin18	96	13992	62.15	23041.6	95.65	0.72	Bacteria	Pseudomonadota	Gammaproteobacteria	Burkholderiales	Burkholderiaceae	Sutterella	Sutterella wadsworthensis_A	1909447	2211997	35148	15.8897	863.223	3057.34
CD27	rCDI	CD27_bin11	88	31556	31.87	34480.2	94.34	0	Bacteria	Bacillota_I	Bacilli_A	Erysipelotrichales	Coprobacillaceae	Thomasclavelia	Thomasclavelia ramosa	301527	3034256	5550.34	1.82923	99.3743	351.962
CD27	rCDI	CD27_bin26	74	47745	37.44	24348.4	93.34	2.53	Bacteria	Bacillota	Bacilli	Lactobacillales	Streptococcaceae	Streptococcus	Streptococcus lutetiensis	630455	1801784	11605.1	6.44087	349.906	1239.29
CD27	rCDI	CD27_bin15	38	184615	55.51	67315.7	91.84	0.68	Bacteria	Verrucomicrobiota	Verrucomicrobiae	Verrucomicrobiales	Akkermansiaceae	Akkermansia	Akkermansia muciniphila	2196923	2557996	40439.7	15.8091	858.845	3041.84
CD27	rCDI	CD27_bin3	131	13312	43.52	31021.3	89.62	0	Bacteria	Bacillota_I	Bacilli_A	Erysipelotrichales	Erysipelotrichaceae	Clostridium_AQ	Clostridium_AQ innocuum	515358	4063788	9486.42	2.33438	126.817	449.158
CD27	rCDI	CD27_bin31	385	1372	37.33	3917.86	86.22	0.34	Bacteria	Bacillota_A	Clostridia	Oscillospirales	Acutalibacteraceae	UMGS1071	UMGS1071 sp900548305	31527	1508376	580.331	0.384739	20.9013	74.0277
CD28	rCDI	CD28_bin10	46	360609	64.37	86502.2	100	0	Bacteria	Pseudomonadota	Gammaproteobacteria	Burkholderiales	Aquaspirillaceae	Microvirgula	Microvirgula aerodenitrificans	413041	3979102	8521.99	2.14169	103.803	2138.89
CD28	rCDI	CD28_bin34	59	161217	59.89	42113.8	100	0	Bacteria	Synergistota	Synergistia	Synergistales	Dethiosulfovibrionaceae	Pyramidobacter	Pyramidobacter piscolens	517060	2484713	10668.1	4.29351	208.096	4287.9
CD28	rCDI	CD28_bin35	14	449746	38.53	154552	100	0	Bacteria	Bacillota_C	Negativicutes	Veillonellales	Veillonellaceae	Veillonella	Veillonella sp018376995	384580	2163730	7934.78	3.66718	177.739	3662.38
CD28	rCDI	CD28_bin8	142	34382	59.42	29627.5	100	0.59	Bacteria	Desulfobacterota	Desulfovibrionia	Desulfovibrionales	Desulfovibrionaceae	Bilophila	Bilophila wadsworthia	620028	4207104	12792.6	3.04072	147.376	3036.74
CD28	rCDI	CD28_bin31	108	78260	31.49	24005.5	100	1.08	Bacteria	Bacillota_I	Bacilli_A	Erysipelotrichales	Coprobacillaceae	Allocoprobacillus	Allocoprobacillus merdigallinarum	707627	2592589	14600	5.63143	272.942	5624.07
CD28	rCDI	CD28_bin30	83	140053	56.18	32976.3	100	1.36	Bacteria	Bacillota_A	Clostridia	Oscillospirales	Ruminococcaceae	Faecalibacterium	Faecalibacterium prausnitzii_D	2920733	2737036	60261.5	22.0171	1067.12	21988.3
CD28	rCDI	CD28_bin7	113	17293	43.52	39858.9	100	1.89	Bacteria	Bacillota_I	Bacilli_A	Erysipelotrichales	Erysipelotrichaceae	Clostridium_AQ	Clostridium_AQ sp003481775	693510	4504053	14308.7	3.17685	153.975	3172.7
CD28	rCDI	CD28_bin32	150	34378	28.23	17192.1	100	2.49	Bacteria	Bacillota_I	Bacilli_A	Erysipelotrichales	Coprobacillaceae	Thomasclavelia	Thomasclavelia spiroformis	363605	2578817	7502.02	2.90909	140.997	2905.29
CD28	rCDI	CD28_bin16	43	155889	41.88	88465.7	99.68	2.7	Bacteria	Pseudomonadota	Gammaproteobacteria	Enterobacterales	Enterobacteriaceae	Providencia	Providencia alcalifaciens	193737	3804026	3997.24	1.05079	50.9295	1049.42
CD28	rCDI	CD28_bin23	134	62875	41.12	24174.8	99.52	1.45	Bacteria	Bacillota_A	Clostridia	Lachnospirales	Lachnospiraceae	Agathobacter	Agathobacter rectalis	2823003	3239428	58245.1	17.9801	871.451	17956.5
CD28	rCDI	CD28_bin4	174	76317	47.89	27657.1	99.37	0.32	Bacteria	Bacillota_A	Clostridia	Lachnospirales	Lachnospiraceae	Otoolea	Otoolea symbiosa	4767822	4812336	98371.2	20.4415	990.75	20414.7
CD28	rCDI	CD28_bin3	419	45766	48.59	12993.5	99.37	3.48	Bacteria	Bacillota_A	Clostridia	Lachnospirales	Lachnospiraceae	Enterocloster	Enterocloster clostridioformis_A	4327872	5444286	89294	16.4014	794.938	16380
CD28	rCDI	CD28_bin1	111	138781	48.77	63840.9	99.37	4.06	Bacteria	Bacillota_A	Clostridia	Lachnospirales	Lachnospiraceae	Hungatella	Unclassified_Hungatella	3442716	7086339	71031.2	10.0237	485.824	10010.6
CD28	rCDI	CD28_bin26	282	33453	54.97	10884.9	99.32	0.68	Bacteria	Bacillota_A	Clostridia	Oscillospirales	Ruminococcaceae	Gemmiger	Gemmiger qucibialis	1770818	3069552	36536.1	11.9027	576.898	11887.2
CD28	rCDI	CD28_bin20	57	23883	29.68	63069.5	99.19	0.04	Bacteria	Bacillota_A	Clostridia	Clostridiales	Clostridiaceae	Clostridium	Clostridium paraputrificum	173308	3594964	3575.75	0.994654	48.2085	993.353
CD28	rCDI	CD28_bin18	32	1949637	28.51	118244	99.19	0.56	Bacteria	Bacillota_A	Clostridia	Clostridiales	Clostridiaceae	Clostridium	Unclassified_Clostridium	332458	3783804	6859.38	1.81283	87.8634	1810.46
CD28	rCDI	CD28_bin27	137	61309	29.64	21696.4	99.06	0.13	Bacteria	Bacillota_I	Bacilli_A	Erysipelotrichales	Coprobacillaceae	Thomasclavelia	Thomasclavelia merdavium	1571512	2972401	32423.9	10.9083	528.701	10894.1
CD28	rCDI	CD28_bin9	221	35290	46.63	18195.8	99.03	3.8	Bacteria	Bacillota_A	Clostridia	Lachnospirales	Lachnospiraceae	Acetatifactor	Acetatifactor acetigignens	670223	4021283	13828.3	3.43877	166.669	3434.27
CD28	rCDI	CD28_bin29	255	8560	46.65	11218.6	98.69	0.36	Bacteria	Bacillota	Bacilli	Lactobacillales	Lactobacillaceae	Lacticaseibacillus	Lacticaseibacillus rhamnosus	95302	2860746	1966.3	0.687339	33.3137	686.44
CD28	rCDI	CD28_bin21	105	96883	54.31	33627.9	98.66	0.22	Bacteria	Bacillota_A	Clostridia	Oscillospirales	Ruminococcaceae	Anaerotruncus	Anaerotruncus colihominis	655760	3530933	13529.9	3.83181	185.719	3826.79
CD28	rCDI	CD28_bin22	231	136528	42.36	14131.2	98.25	3.99	Bacteria	Bacillota_A	Clostridia	Lachnospirales	Lachnospiraceae	Lachnoclostridium_A	Lachnoclostridium_A edouardi	117507	3264315	2424.44	0.742711	35.9974	741.739
CD28	rCDI	CD28_bin24	213	37535	31.32	15101.1	97.98	2.02	Bacteria	Bacillota_I	Bacilli_A	Erysipelotrichales	Coprobacillaceae	Thomasclavelia	Thomasclavelia ramosa	115479	3216528	2382.6	0.740737	35.9018	739.768
CD28	rCDI	CD28_bin28	73	366278	55.22	39892.1	97.96	0	Bacteria	Verrucomicrobiota	Verrucomicrobiae	Verrucomicrobiales	Akkermansiaceae	Akkermansia	Akkermansia muciniphila	4395310	2912126	90685.5	31.1406	1509.31	31099.9
CD28	rCDI	CD28_bin17	58	238535	51.11	65377.4	97.83	0.14	Bacteria	Pseudomonadota	Gammaproteobacteria	Enterobacterales	Enterobacteriaceae	Morganella	Morganella morganii	300242	3791888	6194.69	1.63367	79.1801	1631.53
CD28	rCDI	CD28_bin14	197	122226	41.49	19637.1	97.47	0	Bacteria	Bacillota_A	Clostridia	Lachnospirales	Lachnospiraceae	Blautia_A	Blautia_A wexlerae	3996409	3868512	82455.2	21.3144	1033.06	21286.6
CD28	rCDI	CD28_bin12	177	117245	42.42	22150.5	95.65	1.93	Bacteria	Bacillota_A	Clostridia	Lachnospirales	Lachnospiraceae	Roseburia	Roseburia intestinalis	1808836	3920643	37320.5	9.51897	461.362	9506.52
CD28	rCDI	CD28_bin2	122	83882	49.11	46250.1	94.94	1.74	Bacteria	Bacillota_A	Clostridia	Lachnospirales	Lachnospiraceae	Diplocloster	Diplocloster agilis	1322768	5642514	27291.8	4.83681	234.429	4830.48
CD28	rCDI	CD28_bin19	96	134187	34.81	37458.2	94.44	1.01	Bacteria	Bacillota_A	Clostridia	Lachnospirales	Lachnospiraceae	Anaerosporobacter	Unclassified_Anaerosporobacter	443882	3595985	9158.32	2.54682	123.438	2543.49
CD28	rCDI	CD28_bin33	38	93462	35.96	66484.5	91.95	0.67	Bacteria	Bacillota_A	Clostridia	Lachnospirales	Lachnospiraceae	Lachnospira	Lachnospira pectinoschiza_A	847796	2526410	17492	6.92366	335.573	6914.6
CD28	rCDI	CD28_bin39	619	4744	56.15	2784.13	83.26	3.63	Bacteria	Actinomycetota	Actinomycetes	Actinomycetales	Actinomycetaceae	Pauljensenia	Pauljensenia sp000308055	34564	1723374	713.136	0.413802	20.056	413.261
CD28	rCDI	CD28_bin11	32	271883	28.34	123263	81.03	0	Bacteria	Bacillota_A	Clostridia	Peptostreptococcales	Peptostreptococcaceae	Clostridioides	Clostridioides difficile	729512	3944420	15051.5	3.8159	184.948	3810.91
CD28	rCDI	CD28_bin15	69	183663	50.78	55517.6	80.08	0.92	Bacteria	Pseudomonadota	Gammaproteobacteria	Enterobacterales	Enterobacteriaceae	Escherichia	Escherichia coli	330092	3830717	6810.56	1.77788	86.1698	1775.56
CD28	rCDI	CD28_bin13	63	135794	50.99	61706.1	79.6	3.45	Bacteria	Pseudomonadota	Gammaproteobacteria	Enterobacterales	Enterobacteriaceae	Citrobacter	Citrobacter sp001037495	328259	3887487	6772.75	1.74219	84.4399	1739.91
CD28	rCDI	CD28_bin40	627	3876	44.76	2423.71	78.77	0.85	Bacteria	Campylobacterota	Campylobacteria	Campylobacterales	Campylobacteraceae	Campylobacter_A	Campylobacter_A curvus	28166	1519668	581.13	0.382406	18.5343	381.906
CD28	rCDI	CD28_bin38	785	2556	58.63	2232.14	70.6	2.44	Bacteria	Actinomycetota	Actinomycetes	Actinomycetales	Bifidobacteriaceae	Bifidobacterium	Bifidobacterium dentium	29338	1752228	605.311	0.345452	16.7433	345
CD29	rCDI	CD29_bin14	51	95549	55.17	56916.7	100	0	Bacteria	Pseudomonadota	Gammaproteobacteria	Burkholderiales	Burkholderiaceae	Sutterella	Sutterella wadsworthensis	1104694	2902750	54922.8	18.921	380.568	2827.91
CD29	rCDI	CD29_bin16	47	344711	26.8	52648.2	100	0	Bacteria	Fusobacteriota	Fusobacteriia	Fusobacteriales	Fusobacteriaceae	Fusobacterium	Fusobacterium animalis	403066	2474464	20039.5	8.09853	162.89	1210.4
CD29	rCDI	CD29_bin20	67	85302	38.54	31180.6	100	1.67	Bacteria	Bacillota_C	Negativicutes	Veillonellales	Veillonellaceae	Veillonella	Veillonella nakazawae	539590	2089103	26827.2	12.8415	258.288	1919.28
CD29	rCDI	CD29_bin18	273	18106	38.31	8262.46	100	3.46	Bacteria	Bacillota	Bacilli	Lactobacillales	Streptococcaceae	Streptococcus	Streptococcus thermophilus	963441	2255651	47900.1	21.2356	427.123	3173.85
CD29	rCDI	CD29_bin1	139	28697	53.78	46286.4	99.41	1.22	Bacteria	Bacillota	Bacilli	Paenibacillales	Paenibacillaceae	Paenibacillus_B	Paenibacillus_B thiaminolyticus	543150	6433814	27004.2	4.19722	84.4212	627.314
CD29	rCDI	CD29_bin24	23	344293	41.12	78732.7	99.3	0.96	Bacteria	Bacillota	Bacilli	Lactobacillales	Lactobacillaceae	Ligilactobacillus	Ligilactobacillus animalis	398783	1810853	19826.6	10.9487	220.218	1636.39
CD29	rCDI	CD29_bin7	72	85275	42.19	47671.6	98.13	2.6	Bacteria	Bacillota	Bacilli	Lactobacillales	Enterococcaceae	Enterococcus_D	Enterococcus_D innesii	1268075	3432354	63045.8	18.3681	369.448	2745.28
CD29	rCDI	CD29_bin11	44	58585	57.81	70423.7	97.96	0.68	Bacteria	Verrucomicrobiota	Verrucomicrobiae	Verrucomicrobiales	Akkermansiaceae	Akkermansia	Akkermansia massiliensis	4403247	3098644	218919	70.65	1421.02	10559.3
CD29	rCDI	CD29_bin21	71	128926	29.71	28418.6	97.33	2.78	Bacteria	Bacillota_I	Bacilli_A	Acholeplasmatales	Anaeroplasmataceae	Anaeroplasma	Unclassified_Anaeroplasma	1736745	2017719	86346.9	42.7943	860.747	6396.01
CD29	rCDI	CD29_bin17	41	379779	45.54	60135.1	97.32	0	Bacteria	Bacillota_A	Clostridia	Lachnospirales	Anaerotignaceae	Anaerotignum	Anaerotignum sp001304995	200016	2465538	9944.33	4.03333	81.1247	602.819
CD29	rCDI	CD29_bin5	117	54139	38.45	31291.9	97.3	3.2	Bacteria	Pseudomonadota	Gammaproteobacteria	Enterobacterales	Enterobacteriaceae	Proteus	Proteus mirabilis	179212	3661155	8910.01	2.43366	48.9496	363.733
CD29	rCDI	CD29_bin3	328	8983	28.66	13908.4	97.24	4.9	Bacteria	Bacillota_A	Clostridia	Clostridiales	Clostridiaceae	Clostridium_J	Clostridium_J argentinense	175666	4561954	8733.71	1.91447	38.5067	286.135
CD29	rCDI	CD29_bin8	42	198168	50.59	78343.2	96.77	4.03	Bacteria	Bacillota_A	Clostridia	Christensenellales	Borkfalkiaceae	Scatosoma	Scatosoma sp900552625	214840	3290414	10681.3	3.2462	65.2927	485.175
CD29	rCDI	CD29_bin12	55	53167	49.85	53994.6	95.97	2.82	Bacteria	Bacillota_A	Clostridia	Christensenellales	Borkfalkiaceae	Scatosoma	Scatosoma sp003150575	421150	2969703	20938.6	7.05074	141.816	1053.8
CD29	rCDI	CD29_bin6	438	24866	46.31	7980.92	95.56	4.84	Bacteria	Bacillota	Bacilli	Lactobacillales	Lactobacillaceae	Lacticaseibacillus	Lacticaseibacillus rhamnosus	429254	3495643	21341.5	6.10518	122.797	912.475
CD29	rCDI	CD29_bin22	260	27666	38.78	7303.34	93.87	0.97	Bacteria	Bacillota_C	Negativicutes	Veillonellales	Veillonellaceae	Veillonella	Veillonella atypica	69290	1898869	3444.94	1.81421	36.4901	271.15
CD29	rCDI	CD29_bin9	271	39477	44.36	11799	93.36	3.86	Bacteria	Bacillota	Bacilli	Lactobacillales	Lactobacillaceae	Lactiplantibacillus	Lactiplantibacillus plantarum	109831	3197518	5460.54	1.70774	34.3488	255.238
CD29	rCDI	CD29_bin15	594	29155	46.55	4193.58	93.13	0.63	Bacteria	Bacillota	Bacilli	Lactobacillales	Lactobacillaceae	Lacticaseibacillus	Lacticaseibacillus paracasei	71599	2490986	3559.74	1.42905	28.7432	213.584
CD29	rCDI	CD29_bin19	603	5452	35.22	3528.69	92.52	3.64	Bacteria	Bacillota	Bacilli	Lactobacillales	Streptococcaceae	Lactococcus	Lactococcus lactis	53519	2127798	2660.84	1.25051	25.1523	186.901
CD30	rCDI	CD30_bin6	26	117884	36.38	111637	100	0	Bacteria	Bacillota_I	Bacilli_A	Erysipelotrichales	Coprobacillaceae	Beduini	Beduini sp027676805	2947170	2902557	78904.2	27.1844	1015.37	9337.22
CD30	rCDI	CD30_bin14	41	726860	38.6	51131	100	2.05	Bacteria	Bacillota_C	Negativicutes	Veillonellales	Veillonellaceae	Veillonella	Veillonella sp915066865	824292	2096370	22068.7	10.5271	393.2	3615.82
CD30	rCDI	CD30_bin1	113	485950	42.99	54614.3	99.26	0.74	Bacteria	Bacteroidota	Bacteroidia	Bacteroidales	Bacteroidaceae	Bacteroides	Bacteroides thetaiotaomicron	10528176	6171417	281870	45.6734	1705.96	15687.8
CD30	rCDI	CD30_bin8	46	94037	35.55	54587.9	98.73	2.22	Bacteria	Bacillota_C	Negativicutes	Selenomonadales	ICN-92133	Selenobaculum	Selenobaculum gbiensis	185953	2511045	4978.5	1.98264	74.054	680.992
CD30	rCDI	CD30_bin5	123	21863	46.41	27699.9	98.63	0	Bacteria	Bacillota	Bacilli	Bacillales_B	Bacillaceae_C	Weizmannia	Weizmannia faecalis	252958	3407092	6772.41	1.98774	74.2445	682.744
CD30	rCDI	CD30_bin12	233	10950	35.04	10250.6	97.85	1.32	Bacteria	Bacillota	Bacilli	Lactobacillales	Streptococcaceae	Lactococcus	Lactococcus lactis	103839	2388386	2780.07	1.16399	43.4766	399.806
CD30	rCDI	CD30_bin9	291	10432	26.97	8549.38	97.75	1.12	Bacteria	Fusobacteriota	Fusobacteriia	Fusobacteriales	Fusobacteriaceae	Fusobacterium	Fusobacterium animalis	79293	2487870	2122.9	0.853301	31.8718	293.089
CD30	rCDI	CD30_bin13	95	16173	50.46	22145.6	95.56	0.29	Bacteria	Bacillota_A	Clostridia	Christensenellales	Borkfalkiaceae	Coproplasma	Coproplasma stercoravium	3901563	2103835	104456	49.6503	1854.5	17053.8
CD30	rCDI	CD30_bin3	69	65134	52.02	60764.4	72.92	0.86	Bacteria	Pseudomonadota	Gammaproteobacteria	Enterobacterales	Enterobacteriaceae	Citrobacter	Citrobacter braakii	363753	4192743	9738.71	2.32275	86.7578	797.814
CD30	rCDI	CD30_bin15	994	3998	46.84	2055.25	71.21	3.46	Bacteria	Bacillota	Bacilli	Lactobacillales	Lactobacillaceae	Lacticaseibacillus	Lacticaseibacillus rhamnosus	34057	2042922	911.804	0.446323	16.6707	153.302
CD31	rCDI	CD31_bin12	42	187675	35.81	69664.5	100	0	Bacteria	Bacillota_I	Bacilli_A	Erysipelotrichales	Coprobacillaceae	Beduini	Beduini sp902363625	2118992	2925909	27032.1	9.23888	724.217	4448.45
CD31	rCDI	CD31_bin24	62	83576	26.85	36885.8	100	0	Bacteria	Fusobacteriota	Fusobacteriia	Fusobacteriales	Fusobacteriaceae	Fusobacterium	Fusobacterium animalis	146101	2286917	1863.82	0.814993	63.8856	392.413
CD31	rCDI	CD31_bin32	18	470389	45.38	95604.6	100	0	Bacteria	Bacillota_C	Negativicutes	Veillonellales	Megasphaeraceae	Anaeroglobus	Anaeroglobus micronuciformis	359021	1720882	4580.06	2.66146	208.626	1281.47
CD31	rCDI	CD31_bin28	26	484768	38.56	82714	100	0.9	Bacteria	Bacillota_C	Negativicutes	Veillonellales	Veillonellaceae	Veillonella	Veillonella parvula_A	3660150	2150564	46692.8	21.7119	1701.95	10454.1
CD31	rCDI	CD31_bin22	116	59638	39.3	20176.3	99.66	0.54	Bacteria	Bacteroidota	Bacteroidia	Bacteroidales	Bacteroidaceae	Prevotella	Prevotella bivia	356081	2340457	4542.55	1.94088	152.142	934.52
CD31	rCDI	CD31_bin11	49	270581	46.26	60867.9	99.46	1.21	Bacteria	Bacillota	Bacilli	Lactobacillales	Lactobacillaceae	Lacticaseibacillus	Lacticaseibacillus paracasei	4551333	2982529	58061.7	19.4673	1526	9373.34
CD31	rCDI	CD31_bin3	50	404944	44.89	99210.1	99.42	0.38	Bacteria	Bacteroidota	Bacteroidia	Bacteroidales	Tannerellaceae	Parabacteroides	Parabacteroides distasonis	900640	4960506	11489.5	2.3162	181.562	1115.23
CD31	rCDI	CD31_bin18	31	208101	35.67	82437.2	99.37	1.27	Bacteria	Bacillota_C	Negativicutes	Selenomonadales	ICN-92133	Selenobaculum	Selenobaculum gbiensis	162166	2555554	2068.76	0.809516	63.4563	389.776
CD31	rCDI	CD31_bin19	188	29433	39.42	13339	99.32	0.7	Bacteria	Bacteroidota	Bacteroidia	Bacteroidales	Bacteroidaceae	Prevotella	Prevotella disiens	180693	2507735	2305.11	0.919201	72.0543	442.588
CD31	rCDI	CD31_bin5	29	376841	45.68	148270	99.29	1.42	Bacteria	Bacillota_A	Clostridia	Peptostreptococcales	Anaerovoracaceae	Emergencia	Emergencia timonensis	696795	4299821	8889.06	2.06731	162.052	995.394
CD31	rCDI	CD31_bin1	93	165590	43.21	72020.3	99.26	0.17	Bacteria	Bacteroidota	Bacteroidia	Bacteroidales	Bacteroidaceae	Bacteroides	Bacteroides thetaiotaomicron	12014008	6697885	153264	22.8824	1793.7	11017.7
CD31	rCDI	CD31_bin9	27	154449	45.4	146760	98.83	0.68	Bacteria	Bacillota_A	Clostridia	Lachnospirales	Lachnospiraceae	Bariatricus	Bariatricus massiliensis	1494128	3962525	19060.7	4.81024	377.065	2316.09
CD31	rCDI	CD31_bin31	178	23347	38.98	10196.8	98.78	3.83	Bacteria	Bacillota	Bacilli	Lactobacillales	Streptococcaceae	Streptococcus	Streptococcus thermophilus	112645	1815028	1437.02	0.791734	62.0624	381.214
CD31	rCDI	CD31_bin27	33	431641	49.39	66410.7	98.14	0.62	Bacteria	Pseudomonadota	Gammaproteobacteria	Burkholderiales	Burkholderiaceae	Sutterella	Sutterella sp900762445	574771	2191553	7332.39	3.34575	262.267	1610.95
CD31	rCDI	CD31_bin14	35	264856	55.62	79127.5	97.96	0.68	Bacteria	Verrucomicrobiota	Verrucomicrobiae	Verrucomicrobiales	Akkermansiaceae	Akkermansia	Akkermansia muciniphila	5295701	2769461	67557.6	24.3938	1912.18	11745.4
CD31	rCDI	CD31_bin13	129	16022	46.66	22153.5	97.4	0.45	Bacteria	Bacillota	Bacilli	Lactobacillales	Lactobacillaceae	Lacticaseibacillus	Lacticaseibacillus rhamnosus	144026	2857798	1837.35	0.642925	50.3975	309.563
CD31	rCDI	CD31_bin16	160	23137	45.63	16812.8	97.32	0	Bacteria	Bacillota_A	Clostridia	Lachnospirales	Anaerotignaceae	Anaerotignum	Anaerotignum sp001304995	465682	2690043	5940.74	2.20842	173.113	1063.34
CD31	rCDI	CD31_bin8	245	123519	43.03	17213.6	97.17	0	Bacteria	Bacillota_I	Bacilli_A	Erysipelotrichales	Erysipelotrichaceae	Clostridium_AQ	Clostridium_AQ sp000165065	164085	4217339	2093.24	0.496342	38.9072	238.985
CD31	rCDI	CD31_bin29	282	10929	47.43	7598.07	96.69	1.1	Bacteria	Bacteroidota	Bacteroidia	Bacteroidales	Porphyromonadaceae	Porphyromonas_A	Porphyromonas_A somerae	71339	2142656	910.076	0.424742	33.2947	204.51
CD31	rCDI	CD31_bin20	95	27069	32.04	25466.6	96.44	1.31	Bacteria	Bacillota	Bacilli	Staphylococcales	Staphylococcaceae	Staphylococcus	Staphylococcus epidermidis	176423	2419323	2250.64	0.930277	72.9225	447.921
CD31	rCDI	CD31_bin21	82	106949	49.3	29121	96.41	0.6	Bacteria	Bacillota_C	Negativicutes	Acidaminococcales	Acidaminococcaceae	Acidaminococcus	Acidaminococcus intestini	2896817	2387922	36954.9	15.4758	1213.11	7451.46
CD31	rCDI	CD31_bin26	115	26671	56.22	19221	93.15	2.85	Bacteria	Bacillota_A	Clostridia	Christensenellales	Borkfalkiaceae	Borkfalkia	Borkfalkia sp017886895	106078	2210421	1353.24	0.612211	47.99	294.775
CD31	rCDI	CD31_bin34	443	6914	42.42	3729.94	91.56	4.63	Bacteria	Bacillota_C	Negativicutes	Veillonellales	Dialisteraceae	Dialister	Dialister sp900541485	50669	1652365	646.388	0.39119	30.6645	188.355
CD31	rCDI	CD31_bin23	36	382922	36.15	64326.3	89.74	0.85	Bacteria	Cyanobacteriota	Vampirovibrionia	Gastranaerophilales	Gastranaerophilaceae	Limenecus	Limenecus avicola	1012251	2315746	12913.4	5.57633	437.117	2684.96
CD31	rCDI	CD31_bin30	614	8538	58.85	3123.35	88.33	3.48	Bacteria	Actinomycetota	Actinomycetes	Mycobacteriales	Mycobacteriaceae	Lawsonella	Lawsonella sp018376445	49474	1917738	631.143	0.329108	25.7981	158.463
CD31	rCDI	CD31_bin7	97	134495	53.34	43704.2	83.57	2.05	Bacteria	Pseudomonadota	Gammaproteobacteria	Enterobacterales	Enterobacteriaceae	Citrobacter_A	Citrobacter_A farmeri	2559425	4239306	32650.8	7.70191	603.737	3708.41
CD31	rCDI	CD31_bin38	257	8325	38.59	4735.87	73.71	2.03	Bacteria	Bacillota_A	Clostridia	Peptostreptococcales	Anaerovoracaceae	S5-A14a	S5-A14a sp000758905	37234	1217119	474.997	0.390263	30.5919	187.909
CD32	rCDI	CD32_bin24	36	206953	43.77	64603.9	99.98	1.5	Bacteria	Bacillota_C	Negativicutes	Acidaminococcales	Acidaminococcaceae	Phascolarctobacterium	Phascolarctobacterium faecium	1049940	2325742	12912	5.55179	451.443	2380.09
CD32	rCDI	CD32_bin21	37	367707	58.48	70424	99.91	2.44	Bacteria	Actinomycetota	Actinomycetes	Actinomycetales	Bifidobacteriaceae	Bifidobacterium	Bifidobacterium dentium	2372971	2605687	29182.5	11.1995	910.689	4801.31
CD32	rCDI	CD32_bin1	150	63104	53.78	42863.8	99.68	0.37	Bacteria	Bacillota	Bacilli	Paenibacillales	Paenibacillaceae	Paenibacillus_B	Paenibacillus_B thiaminolyticus	588279	6429577	7234.58	1.1252	91.4958	482.381
CD32	rCDI	CD32_bin18	41	569862	37.51	69478.3	99.63	0.94	Bacteria	Bacillota	Bacilli	Lactobacillales	Enterococcaceae	Enterococcus	Enterococcus faecalis	691005	2848609	8497.9	2.98317	242.576	1278.9
CD32	rCDI	CD32_bin16	73	43701	61.68	40625.2	99.5	1.58	Bacteria	Pseudomonadota	Alphaproteobacteria	Rhodospirillales	Magnetospirillaceae	Unclassified_Magnetospirillaceae	Unclassified_Magnetospirillaceae	140096	2965637	1722.88	0.580949	47.2398	249.056
CD32	rCDI	CD32_bin27	89	19267	49.99	24452.8	99.4	0.72	Bacteria	Bacillota_C	Negativicutes	Acidaminococcales	Acidaminococcaceae	Acidaminococcus	Acidaminococcus intestini	3491963	2176295	42943.7	19.7325	1604.54	8459.44
CD32	rCDI	CD32_bin4	198	145125	43.19	23059	99.01	2.36	Bacteria	Bacillota_I	Bacilli_A	Erysipelotrichales	Erysipelotrichaceae	Clostridium_AQ	Clostridium_AQ innocuum	1636977	4565680	20131.3	4.40928	358.54	1890.28
CD32	rCDI	CD32_bin31	26	38158	34.54	75198.6	98.94	0	Bacteria	Bacillota	Bacilli	Lactobacillales	Lactobacillaceae	Lactobacillus	Lactobacillus acidophilus	192893	1955163	2372.17	1.21329	98.6583	520.143
CD32	rCDI	CD32_bin7	125	28125	59.55	32719.3	98.82	0	Bacteria	Desulfobacterota	Desulfovibrionia	Desulfovibrionales	Desulfovibrionaceae	Bilophila	Bilophila wadsworthia	2595380	4089912	31917.7	7.804	634.581	3345.62
CD32	rCDI	CD32_bin10	89	123600	61.07	39858.7	98.82	0.3	Bacteria	Desulfobacterota	Desulfovibrionia	Desulfovibrionales	Desulfovibrionaceae	Desulfovibrio	Desulfovibrio fairfieldensis	1912885	3547421	23524.4	6.63142	539.233	2842.93
CD32	rCDI	CD32_bin37	28	68855	45.52	58574.2	98.8	0	Bacteria	Bacillota_C	Negativicutes	Veillonellales	Megasphaeraceae	Anaeroglobus	Anaeroglobus micronuciformis	388040	1640079	4772.07	2.90966	236.598	1247.39
CD32	rCDI	CD32_bin26	124	29652	38.63	17640.9	98.4	1.98	Bacteria	Bacillota_C	Negativicutes	Veillonellales	Veillonellaceae	Veillonella	Veillonella hominis	1773258	2187467	21807.3	9.96921	810.644	4273.86
CD32	rCDI	CD32_bin14	32	171344	56.52	94060.1	97.98	0.23	Bacteria	Bacillota_A	Clostridia	Christensenellales	Unclassified_Christensenellales	Unclassified_Christensenellales	Unclassified_Christensenellales	2732435	3009923	33603.2	11.1641	907.809	4786.13
CD32	rCDI	CD32_bin12	56	105757	57.69	55436.9	97.96	1.36	Bacteria	Verrucomicrobiota	Verrucomicrobiae	Verrucomicrobiales	Akkermansiaceae	Akkermansia	Unclassified_Akkermansia	5858866	3104467	72051.6	23.209	1887.24	9949.84
CD32	rCDI	CD32_bin23	385	8358	28.48	6239.94	97	3.62	Bacteria	Bacillota_I	Bacilli_A	Erysipelotrichales	Coprobacillaceae	Thomasclavelia	Thomasclavelia cocleata	87889	2402378	1080.85	0.449908	36.5842	192.878
CD32	rCDI	CD32_bin19	87	14458	51.39	31806.4	95.56	4.56	Bacteria	Bacillota_A	Clostridia	Christensenellales	Borkfalkiaceae	Borkfalkia	Borkfalkia avistercoris	5010443	2767154	61617.8	22.2676	1810.68	9546.24
CD32	rCDI	CD32_bin28	147	3492	38.35	14348	94.19	1.8	Bacteria	Bacillota_C	Negativicutes	Veillonellales	Veillonellaceae	Veillonella	Veillonella nakazawae	488956	2109151	6013.12	2.85097	231.826	1222.23
CD32	rCDI	CD32_bin29	360	9011	55.75	5795.07	93.24	1.35	Bacteria	Pseudomonadota	Gammaproteobacteria	Burkholderiales	Neisseriaceae	Eikenella	Eikenella corrodens	58738	2086224	722.353	0.346249	28.1552	148.439
CD32	rCDI	CD32_bin20	48	561028	55.9	54994	91.93	1.36	Bacteria	Bacillota_A	Clostridia	Christensenellales	Pumilibacteraceae	Protoclostridium	Unclassified_Protoclostridium	989785	2639712	12172.3	4.61121	374.959	1976.85
CD32	rCDI	CD32_bin33	364	17832	60.47	5041.36	90.79	1.47	Bacteria	Actinomycetota	Actinomycetes	Actinomycetales	Bifidobacteriaceae	Bifidobacterium	Bifidobacterium animalis_B	58882	1835056	724.124	0.394606	32.0873	169.17
CD32	rCDI	CD32_bin22	157	3652	35.44	15862.2	87.97	2.37	Bacteria	Bacillota_C	Negativicutes	Selenomonadales	ICN-92133	Selenobaculum	Selenobaculum gbiensis	567940	2490372	6984.46	2.80458	228.054	1202.34
CD32	rCDI	CD32_bin13	185	29077	45.78	16434.9	87.25	1.34	Bacteria	Bacillota_A	Clostridia	Lachnospirales	Anaerotignaceae	Anaerotignum	Anaerotignum sp001304995	545742	3040457	6711.47	2.20739	179.493	946.32
CD32	rCDI	CD32_bin38	29	340803	32.89	56463.4	85.86	0	Bacteria	Bacillota	Bacilli	Lactobacillales	Lactobacillaceae	Ligilactobacillus	Ligilactobacillus salivarius	164134	1637440	2018.5	1.23272	100.238	528.473
CD32	rCDI	CD32_bin42	449	2126	53.5	3518.49	84.75	2.07	Bacteria	Bacillota_A	Clostridia	Christensenellales	Borkfalkiaceae	Gallimonas	Gallimonas sp017887095	39005	1579804	479.679	0.303632	24.6898	130.169
CD32	rCDI	CD32_bin39	39	89428	57.01	41536.6	82.07	1.65	Bacteria	Bacillota_A	Clostridia	Christensenellales	Pumilibacteraceae	Protoclostridium	Protoclostridium sp900761765	374971	1619927	4611.35	2.84664	231.474	1220.37
CD33	rCDI	CD33_bin9	41	127114	35.63	73216.8	100	0.94	Bacteria	Bacillota_I	Bacilli_A	Erysipelotrichales	Coprobacillaceae	Beduini	Beduini sp902363625	3971448	3001890	48517.5	16.1623	1322.98	8554.25
CD33	rCDI	CD33_bin6	123	197652	59.57	33625.8	99.83	0.59	Bacteria	Desulfobacterota	Desulfovibrionia	Desulfovibrionales	Desulfovibrionaceae	Bilophila	Bilophila wadsworthia	1596353	4135971	19502	4.71521	385.968	2495.62
CD33	rCDI	CD33_bin1	96	403831	53.8	68851.7	99.68	0.33	Bacteria	Bacillota	Bacilli	Paenibacillales	Paenibacillaceae	Paenibacillus_B	Paenibacillus_B thiaminolyticus	1110776	6609767	13569.9	2.053	168.051	1086.6
CD33	rCDI	CD33_bin29	36	48393	60.47	53381.1	99.56	0	Bacteria	Actinomycetota	Actinomycetes	Actinomycetales	Bifidobacteriaceae	Bifidobacterium	Bifidobacterium animalis_B	371553	1921721	4539.11	2.362	193.344	1250.14
CD33	rCDI	CD33_bin16	152	37068	66.95	16638.8	99.53	1.65	Bacteria	Actinomycetota	Actinomycetes	Actinomycetales	Actinomycetaceae	Pauljensenia	Pauljensenia sp958349165	256773	2529098	3136.89	1.24032	101.528	656.465
CD33	rCDI	CD33_bin20	229	14803	57	10472.1	99.47	4.06	Bacteria	Bacillota_C	Negativicutes	Selenomonadales	Selenomonadaceae	Centipeda	Centipeda felix	944313	2398104	11536.3	4.81058	393.775	2546.1
CD33	rCDI	CD33_bin10	65	32336	46.6	45953.8	99.46	1.03	Bacteria	Bacillota	Bacilli	Lactobacillales	Lactobacillaceae	Lacticaseibacillus	Lacticaseibacillus rhamnosus	1563124	2986999	19096	6.39305	523.309	3383.66
CD33	rCDI	CD33_bin15	19	149251	35.38	134539	99.37	1.27	Bacteria	Bacillota_C	Negativicutes	Selenomonadales	ICN-92133	Selenobaculum	Selenobaculum gbiensis	671363	2556250	8201.76	3.20851	262.636	1698.17
CD33	rCDI	CD33_bin3	45	134659	43.39	111777	99.26	0	Bacteria	Bacteroidota	Bacteroidia	Bacteroidales	Bacteroidaceae	Bacteroides	Bacteroides fragilis	1626205	5029963	19866.7	3.94966	323.304	2090.44
CD33	rCDI	CD33_bin11	138	35959	48.27	21045	98.75	0.73	Bacteria	Pseudomonadota	Gammaproteobacteria	Burkholderiales	Burkholderiaceae	Parasutterella	Parasutterella excrementihominis	3588577	2904217	43840.1	15.0953	1235.64	7989.53
CD33	rCDI	CD33_bin28	39	64152	43.96	50191.5	98.56	0.11	Bacteria	Bacillota_I	Bacilli_A	Acholeplasmatales	Anaeroplasmataceae	Anaeroplasma	Unclassified_Anaeroplasma	3771730	1957467	46077.6	23.5394	1926.84	12458.7
CD33	rCDI	CD33_bin22	73	187134	34.93	31945	98.49	0.38	Bacteria	Bacillota	Bacilli	Lactobacillales	Streptococcaceae	Lactococcus	Lactococcus lactis	434637	2331987	5309.78	2.27693	186.381	1205.11
CD33	rCDI	CD33_bin25	52	72169	44.18	38625.2	98.4	0.49	Bacteria	Campylobacterota	Campylobacteria	Campylobacterales	Campylobacteraceae	Campylobacter_A	Campylobacter_A curvus	80811	2008510	987.234	0.491526	40.2343	260.15
CD33	rCDI	CD33_bin30	51	117878	45.09	36397.8	98.1	0.63	Bacteria	Bacillota_C	Negativicutes	Veillonellales	Dialisteraceae	Dialister	Dialister invisus	1056106	1856285	12902	6.95044	568.935	3678.67
CD33	rCDI	CD33_bin24	24	387008	38.01	83973.2	97.99	0	Bacteria	Bacillota_A	Clostridia	Oscillospirales	Acutalibacteraceae	UMGS1071	Unclassified_UMGS1071	115037	2015356	1405.36	0.697325	57.0802	369.074
CD33	rCDI	CD33_bin13	60	319660	47.48	43299.3	97.58	0	Bacteria	Bacillota_A	Clostridia	Christensenellales	Borkfalkiaceae	Scatosoma	Scatosoma sp900555925	400919	2597961	4897.86	1.88527	154.321	997.819
CD33	rCDI	CD33_bin12	312	60000	46.49	9242.26	97.53	1.63	Bacteria	Bacillota	Bacilli	Lactobacillales	Lactobacillaceae	Lacticaseibacillus	Lacticaseibacillus paracasei	1413221	2883586	17264.7	5.98724	490.092	3168.87
CD33	rCDI	CD33_bin14	110	18089	50.57	23582.9	96.77	0	Bacteria	Bacillota_A	Clostridia	Christensenellales	Borkfalkiaceae	Scatosoma	Scatosoma sp003150575	188820	2594123	2306.73	0.889216	72.7876	470.636
CD33	rCDI	CD33_bin17	69	208339	51.47	36582.3	94.76	1.84	Bacteria	Bacillota_A	Clostridia	Christensenellales	Borkfalkiaceae	Borkfalkia	Borkfalkia ceftriaxoniphila	4700915	2524182	57429.1	22.7516	1862.35	12041.7
CD33	rCDI	CD33_bin23	255	13900	41.42	8270.76	93.83	4.15	Bacteria	Bacillota	Bacilli	Lactobacillales	Lactobacillaceae	Pediococcus	Pediococcus acidilactici	904826	2109044	11053.9	5.24118	429.022	2774.01
CD33	rCDI	CD33_bin21	59	81911	27.2	39861.4	92.96	0	Bacteria	Bacillota_A	Clostridia	Peptostreptococcales	Peptostreptococcaceae	Romboutsia	Romboutsia timonensis	179221	2351825	2189.47	0.930965	76.2051	492.733
CD33	rCDI	CD33_bin8	220	40488	44.22	15237	92.8	4.84	Bacteria	Bacillota	Bacilli	Lactobacillales	Lactobacillaceae	Lactiplantibacillus	Lactiplantibacillus plantarum	449610	3352131	5492.7	1.63857	134.127	867.247
CD33	rCDI	CD33_bin27	37	1754	39.49	52980.3	91.89	0.97	Bacteria	Pseudomonadota	Gammaproteobacteria	Enterobacterales	Pasteurellaceae	Haemophilus_D	Haemophilus_D parainfluenzae_P	509121	1960273	6219.72	3.17288	259.719	1679.32
CD33	rCDI	CD33_bin33	26	297001	38.64	68235.2	91.62	1.5	Bacteria	Bacillota_C	Negativicutes	Veillonellales	Veillonellaceae	Veillonella	Veillonella sp018376995	2921958	1774116	35696.3	20.1206	1646.99	10649.3
CD33	rCDI	CD33_bin19	177	31136	26.81	13623.3	91.17	3.37	Bacteria	Fusobacteriota	Fusobacteriia	Fusobacteriales	Fusobacteriaceae	Fusobacterium	Fusobacterium animalis	3555890	2411317	43440.8	18.0154	1474.67	9535.03
CD33	rCDI	CD33_bin4	122	284259	55.79	38488.5	82.1	2.21	Bacteria	Pseudomonadota	Gammaproteobacteria	Enterobacterales	Enterobacteriaceae	Klebsiella	Klebsiella michiganensis	1836368	4695599	22434.1	4.77769	391.083	2528.7
CD33	rCDI	CD33_bin38	234	46625	55.45	6648.37	77.27	0.66	Bacteria	Bacillota_C	Negativicutes	Selenomonadales	Selenomonadaceae	Centipeda	Centipeda flueggei	126659	1555718	1547.34	0.994614	81.4151	526.421
CD33	rCDI	CD33_bin43	35	78651	45.59	35316.9	71.86	0	Bacteria	Bacillota_C	Negativicutes	Veillonellales	Megasphaeraceae	Anaeroglobus	Anaeroglobus micronuciformis	109376	1236092	1336.2	1.08099	88.4853	572.136
CD33	rCDI	CD33_bin40	643	1558	58.09	2259.32	71.37	1.96	Bacteria	Actinomycetota	Actinomycetes	Actinomycetales	Actinomycetaceae	Actinomyces	Actinomyces graevenitzii	28867	1452740	352.656	0.242752	19.8707	128.482
CD34	rCDI	CD34_bin12	71	14030	38.85	28480.2	100	0.6	Bacteria	Bacillota_C	Negativicutes	Veillonellales	Veillonellaceae	Veillonella	Veillonella atypica	2377415	2022097	41184.8	20.3674	1175.72	8586.37
CD34	rCDI	CD34_bin16	27	347495	45.34	63359.9	100	0.6	Bacteria	Bacillota_C	Negativicutes	Veillonellales	Megasphaeraceae	Anaeroglobus	Anaeroglobus micronuciformis	1064226	1710718	18435.9	10.7767	622.093	4543.2
CD34	rCDI	CD34_bin14	39	123475	39.63	48511	99.51	0.56	Bacteria	Campylobacterota	Campylobacteria	Campylobacterales	Campylobacteraceae	Campylobacter_A	Campylobacter_A concisus_C	100734	1891929	1745.05	0.922365	53.2441	388.846
CD34	rCDI	CD34_bin2	80	127325	45.07	64458	99.42	1.73	Bacteria	Bacteroidota	Bacteroidia	Bacteroidales	Tannerellaceae	Parabacteroides	Parabacteroides distasonis	9854390	5156639	170711	33.1051	1911.01	13956.3
CD34	rCDI	CD34_bin15	21	259971	41.16	86220.1	99.3	0.52	Bacteria	Bacillota	Bacilli	Lactobacillales	Lactobacillaceae	Ligilactobacillus	Ligilactobacillus animalis	1437033	1810623	24894.2	13.749	793.668	5796.22
CD34	rCDI	CD34_bin10	60	456649	57.69	52033.6	97.96	1.69	Bacteria	Verrucomicrobiota	Verrucomicrobiae	Verrucomicrobiales	Akkermansiaceae	Akkermansia	Akkermansia massiliensis	6124144	3122017	106091	33.9814	1961.6	14325.7
CD34	rCDI	CD34_bin11	48	19292	35.27	56759.2	96.75	1.27	Bacteria	Bacillota_C	Negativicutes	Selenomonadales	ICN-92133	Selenobaculum	Selenobaculum gbiensis	1818358	2724442	31500	11.562	667.424	4874.26
HC01	Healthy	HC01_bin82	11	255739	53.95	154093	100	0.12	Bacteria	Actinomycetota	Coriobacteriia	Coriobacteriales	Eggerthellaceae	Anaerotardibacter	Anaerotardibacter sp000435675	125646	1695018	1345.38	0.793725	74.1266	457.529
HC01	Healthy	HC01_bin23	54	277095	64.99	60951	100	1.21	Bacteria	Actinomycetota	Coriobacteriia	Coriobacteriales	Eggerthellaceae	CAJFUR01	CAJFUR01 sp904420575	216076	3291353	2313.67	0.702955	65.6496	405.206
HC01	Healthy	HC01_bin55	32	246086	62.33	74236.9	100	3.23	Bacteria	Actinomycetota	Coriobacteriia	Coriobacteriales	Eggerthellaceae	Senegalimassilia	Senegalimassilia anaerobia	241022	2375582	2580.79	1.08638	101.458	626.226
HC01	Healthy	HC01_bin2	88	89891	43.2	70295.5	99.62	0.77	Bacteria	Bacteroidota	Bacteroidia	Bacteroidales	Tannerellaceae	Parabacteroides	Parabacteroides sp900540715	837478	6186006	8967.45	1.44963	135.383	835.617
HC01	Healthy	HC01_bin66	27	185238	56.32	79817.8	99.55	0.68	Bacteria	Actinomycetota	Actinomycetes	Actinomycetales	Bifidobacteriaceae	Bifidobacterium	Bifidobacterium pseudocatenulatum	999849	2155081	10706.1	4.96783	463.95	2863.62
HC01	Healthy	HC01_bin7	62	408102	44.95	79504.9	99.42	0.58	Bacteria	Bacteroidota	Bacteroidia	Bacteroidales	Tannerellaceae	Parabacteroides	Parabacteroides distasonis	713919	4929307	7644.42	1.55081	144.832	893.938
HC01	Healthy	HC01_bin27	77	110220	38.81	41159	99.37	3.59	Bacteria	Bacillota_A	Clostridia	Lachnospirales	Lachnospiraceae	Blautia	Blautia stercoris	429981	3169245	4604.1	1.45274	135.673	837.409
HC01	Healthy	HC01_bin3	320	66564	42.18	18359.8	99.25	4.82	Bacteria	Bacteroidota	Bacteroidia	Bacteroidales	Bacteroidaceae	Phocaeicola	Phocaeicola vulgatus	3367707	5875145	36060.3	6.13778	573.213	3538.02
HC01	Healthy	HC01_bin57	86	49784	54.38	27028.5	98.87	0.38	Bacteria	Bacteroidota	Bacteroidia	Bacteroidales	Muribaculaceae	CAG-1031	CAG-1031 sp000431215	1057014	2324453	11318.2	4.86918	454.737	2806.75
HC01	Healthy	HC01_bin50	57	62435	51.42	43636.8	98.83	0.29	Bacteria	Bacillota_A	Clostridia	Lachnospirales	Lachnospiraceae	Massilistercora	Massilistercora timonensis	669863	2487300	7172.68	2.88372	269.313	1662.27
HC01	Healthy	HC01_bin18	145	41764	42.91	24837.5	98.73	2.23	Bacteria	Bacillota_A	Clostridia	Lachnospirales	Lachnospiraceae	Blautia_A	Blautia_A faecis	673790	3601441	7214.73	2.00329	187.089	1154.76
HC01	Healthy	HC01_bin35	46	21816	51.68	63738.3	98.39	0.81	Bacteria	Bacillota_A	Clostridia	Christensenellales	Christensenellaceae	Christensenella	Christensenella minuta	199154	2931961	2132.48	0.727321	67.9252	419.252
HC01	Healthy	HC01_bin21	80	132906	56.2	41479.9	98.39	2.42	Bacteria	Bacillota_A	Clostridia	Christensenellales	Aristaeellaceae	Fimadaptatus	Fimadaptatus sp900553645	688067	3318391	7367.6	2.22023	207.35	1279.82
HC01	Healthy	HC01_bin45	72	332885	44.81	36648.3	98.32	0	Bacteria	Bacillota_A	Clostridia	Oscillospirales	Ruminococcaceae	Ruminiclostridium_E	Ruminiclostridium_E siraeum	769472	2638679	8239.26	3.1225	291.613	1799.91
HC01	Healthy	HC01_bin76	25	312887	41.1	76961.2	98.32	1.2	Bacteria	Bacillota_A	Clostridia	Oscillospirales	Acutalibacteraceae	Ruminococcus_E	Ruminococcus_E bromii	656782	1924031	7032.61	3.65515	341.357	2106.95
HC01	Healthy	HC01_bin52	42	301293	58.11	58290.1	98.32	2.08	Bacteria	Bacillota_A	Clostridia	Oscillospirales	Oscillospiraceae	Evtepia	Evtepia gabavorous	380036	2448184	4069.31	1.66217	155.232	958.131
HC01	Healthy	HC01_bin19	87	129222	57.74	40856.4	98.32	4.81	Bacteria	Bacteroidota	Bacteroidia	Bacteroidales	Rikenellaceae	Alistipes	Alistipes onderdonkii	471381	3554510	5047.4	1.42	132.615	818.534
HC01	Healthy	HC01_bin38	117	117046	29.58	24513.3	98.11	0	Bacteria	Bacillota_I	Bacilli_A	Erysipelotrichales	Coprobacillaceae	Faecalibacillus	Faecalibacillus intestinalis	630387	2868054	6749.98	2.35351	219.796	1356.64
HC01	Healthy	HC01_bin9	82	106233	46.46	54859	98.03	0.46	Bacteria	Bacteroidota	Bacteroidia	Bacteroidales	Bacteroidaceae	Bacteroides	Bacteroides uniformis	531506	4498440	5691.2	1.26515	118.153	729.274
HC01	Healthy	HC01_bin22	126	56599	49.5	26178.7	97.99	1.14	Bacteria	Bacillota_A	Clostridia	Oscillospirales	Acutalibacteraceae	Clostridium_A	Clostridium_A leptum	534512	3298517	5723.39	1.73514	162.046	1000.19
HC01	Healthy	HC01_bin73	41	70809	52	48885.2	97.98	0	Bacteria	Bacillota_A	Clostridia	Christensenellales	QAND01	UMGS1975	UMGS1975 sp900546685	257899	2004291	2761.5	1.37779	128.673	794.206
HC01	Healthy	HC01_bin39	67	62792	55.31	42560.4	97.96	0	Bacteria	Verrucomicrobiota	Verrucomicrobiae	Verrucomicrobiales	Akkermansiaceae	Akkermansia	Akkermansia muciniphila	2395066	2851547	25645.6	8.99358	839.918	5184.19
HC01	Healthy	HC01_bin74	91	18045	47.62	21844.5	97.87	1.06	Bacteria	Bacillota_A	Clostridia	Peptostreptococcales	Anaerovoracaceae	Lentihominibacter	Lentihominibacter faecis	83305	1987845	892.004	0.448729	41.9072	258.662
HC01	Healthy	HC01_bin14	76	60215	46.01	51851.5	97.55	1.23	Bacteria	Bacteroidota	Bacteroidia	Bacteroidales	Bacteroidaceae	Bacteroides	Bacteroides stercoris	1618033	3940717	17325.4	4.39651	410.594	2534.29
HC01	Healthy	HC01_bin37	71	206177	37.94	41155.5	97.32	0.67	Bacteria	Bacillota_A	Clostridia	UBA1381	UBA1381	Hominilimicola	Hominilimicola fabiformis	2430292	2922043	26022.8	8.90569	831.71	5133.53
HC01	Healthy	HC01_bin1	78	436856	42.63	84916.8	97.25	2.04	Bacteria	Bacteroidota	Bacteroidia	Bacteroidales	Bacteroidaceae	Bacteroides	Bacteroides cellulosilyticus	2637580	6623513	28242.4	4.26396	398.215	2457.89
HC01	Healthy	HC01_bin58	36	62446	60.29	64224.6	97.24	0	Bacteria	Actinomycetota	Actinomycetes	Actinomycetales	Bifidobacteriaceae	Bifidobacterium	Bifidobacterium longum	1030057	2312087	11029.5	4.77038	445.51	2749.8
HC01	Healthy	HC01_bin32	90	37446	36.7	34215.9	97	0	Bacteria	Bacillota_A	Clostridia	Lachnospirales	Lachnospiraceae	Butyribacter	Butyribacter intestini	175578	3079429	1880.03	0.610514	57.0164	351.92
HC01	Healthy	HC01_bin54	31	123780	49.65	77491.1	96.73	1.17	Bacteria	Pseudomonadota	Gammaproteobacteria	Burkholderiales	Burkholderiaceae	Oxalobacter	Oxalobacter formigenes	263032	2402224	2816.46	1.17244	109.495	675.833
HC01	Healthy	HC01_bin86	41	34349	50.63	39615.7	96.71	2.15	Bacteria	Pseudomonadota	Alphaproteobacteria	RF32	CAG-239	CAZU01	CAZU01 sp017480995	217637	1624245	2330.39	1.43475	133.993	827.038
HC01	Healthy	HC01_bin56	51	258915	53.76	45643.1	96.64	0.13	Bacteria	Bacillota_A	Clostridia	Oscillospirales	Acutalibacteraceae	Fimenecus	Fimenecus stercoravium	167370	2327797	1792.15	0.769889	71.9006	443.789
HC01	Healthy	HC01_bin28	46	302726	56.1	68617.7	96.5	1.74	Bacteria	Bacillota_A	Clostridia	Christensenellales	Aristaeellaceae	Ventricola	Ventricola sp900542445	636236	3156415	6812.61	2.15834	201.569	1244.14
HC01	Healthy	HC01_bin44	146	9826	44.31	18867.2	96.48	2.03	Bacteria	Bacillota_A	Clostridia	Lachnospirales	Lachnospiraceae	Wujia	Wujia chipingensis	127064	2754617	1360.56	0.49392	46.1276	284.712
HC01	Healthy	HC01_bin30	91	55047	58.27	34122.7	96.15	0	Bacteria	Bacillota_A	Clostridia	Oscillospirales	Ruminococcaceae	Ruthenibacterium	Ruthenibacterium lactatiformans	239805	3105163	2567.76	0.826931	77.2278	476.67
HC01	Healthy	HC01_bin26	181	62586	41.5	17544.8	96.08	3.14	Bacteria	Bacillota_A	Clostridia	Lachnospirales	Lachnospiraceae	Agathobacter	Agathobacter rectalis	1792431	3175608	19192.8	6.04381	564.437	3483.85
HC01	Healthy	HC01_bin41	66	148921	61.16	42109.8	95.97	0.67	Bacteria	Bacillota_A	Clostridia	Christensenellales	Aristaeellaceae	Limiplasma	Limiplasma merdipullorum	312943	2779245	3350.89	1.20569	112.6	694.997
HC01	Healthy	HC01_bin72	47	70268	58.84	42740.1	95.97	1.23	Bacteria	Bacillota_A	Clostridia	Oscillospirales	Oscillospiraceae	Onthomonas	Unclassified_Onthomonas	104999	2008784	1124.3	0.55969	52.2699	322.624
HC01	Healthy	HC01_bin67	215	8661	55.95	9840.14	95.65	0.41	Bacteria	Pseudomonadota	Gammaproteobacteria	Burkholderiales	Burkholderiaceae	Sutterella	Sutterella wadsworthensis	66378	2115630	710.755	0.335954	31.3751	193.655
HC01	Healthy	HC01_bin68	45	76712	60.54	46811.8	95.56	0	Bacteria	Actinomycetota	Coriobacteriia	Coriobacteriales	Eggerthellaceae	Ellagibacter	Ellagibacter isourolithinifaciens	186264	2106529	1994.46	0.946797	88.4222	545.765
HC01	Healthy	HC01_bin31	59	15370	29.2	52580.4	95.16	1.61	Bacteria	Bacillota_A	Clostridia	Clostridiales	Clostridiaceae	Clostridium	Clostridium sp000435835	372791	3102245	3991.73	1.28672	120.168	741.709
HC01	Healthy	HC01_bin70	103	65477	43.56	20299.1	94.76	0.58	Bacteria	Bacillota_A	Clostridia	Lachnospirales	Lachnospiraceae	Mediterraneibacter	Mediterraneibacter lactaris	386129	2090808	4134.55	1.97749	184.679	1139.89
HC01	Healthy	HC01_bin63	30	139399	47.05	74233.4	94.61	0.9	Bacteria	Bacillota_C	Negativicutes	Acidaminococcales	Acidaminococcaceae	Phascolarctobacterium_A	Phascolarctobacterium_A succinatutens_B	724329	2227002	7755.89	3.48266	325.248	2007.52
HC01	Healthy	HC01_bin11	62	230127	52.26	70191.9	94.32	0.28	Bacteria	Pseudomonadota	Gammaproteobacteria	Enterobacterales	Enterobacteriaceae	Citrobacter	Citrobacter braakii	450716	4351899	4826.12	1.10897	103.568	639.247
HC01	Healthy	HC01_bin64	40	24554	60.95	54945.2	94.3	0.69	Bacteria	Bacillota_A	Clostridia	Oscillospirales	Oscillospiraceae	CAG-103	CAG-103 sp900543625	147690	2197807	1581.42	0.719544	67.1988	414.769
HC01	Healthy	HC01_bin13	165	169203	59.72	24390.4	94.08	0	Bacteria	Desulfobacterota	Desulfovibrionia	Desulfovibrionales	Desulfovibrionaceae	Bilophila	Bilophila wadsworthia	218359	4024413	2338.12	0.580984	54.2586	334.898
HC01	Healthy	HC01_bin88	21	443801	53.25	74363.3	93.55	0	Bacteria	Actinomycetota	Coriobacteriia	Coriobacteriales	Eggerthellaceae	Anaerotardibacter	Anaerotardibacter sp000436075	622138	1561630	6661.66	4.26584	398.39	2458.97
HC01	Healthy	HC01_bin103	7	235651	27.83	173231	93.26	3.53	Bacteria	Bacillota_I	Bacilli_A	RF39	UBA660	CAG-417	CAG-417 sp000432835	216005	1212618	2312.91	1.90737	178.131	1099.47
HC01	Healthy	HC01_bin100	64	46900	27.34	20333.6	92.7	4.9	Bacteria	Bacillota_I	Bacilli_A	RF39	UBA660	UMGS995	UMGS995 sp900547465	173817	1301349	1861.18	1.43019	133.567	824.409
HC01	Healthy	HC01_bin46	216	18008	56.09	12159.1	92.52	2.04	Bacteria	Bacillota_A	Clostridia	Oscillospirales	Ruminococcaceae	Gemmiger	Gemmiger qucibialis	1653984	2626359	17710.3	6.7433	629.763	3887.06
HC01	Healthy	HC01_bin99	13	52104	26.25	103341	92.42	4.49	Bacteria	Bacillota_I	Bacilli_A	RF39	UBA660	CAG-302	CAG-302 sp934162325	293798	1343431	3145.9	2.34169	218.692	1349.83
HC01	Healthy	HC01_bin69	103	23399	57.71	20403.2	92.26	0	Bacteria	Actinomycetota	Coriobacteriia	Coriobacteriales	Eggerthellaceae	Slackia	Slackia isoflavoniconvertens	80237	2101527	859.152	0.408823	38.1803	235.659
HC01	Healthy	HC01_bin85	48	119362	39.44	34234	91.39	1.01	Bacteria	Bacillota_A	Clostridia	Lachnospirales	Lachnospiraceae	UBA4285	UBA4285 sp900545225	195511	1643231	2093.47	1.274	118.98	734.373
HC01	Healthy	HC01_bin43	64	60052	35.88	43124	91.28	0	Bacteria	Bacillota_A	Clostridia	Lachnospirales	Lachnospiraceae	Lachnospira	Lachnospira pectinoschiza_A	470435	2759938	5037.27	1.82514	170.451	1052.07
HC01	Healthy	HC01_bin60	75	62727	56.01	30534.5	91.28	0.69	Bacteria	Bacillota_A	Clostridia	Oscillospirales	Oscillospiraceae	Vescimonas	Vescimonas sp003539495	266240	2290088	2850.81	1.24485	116.258	717.572
HC01	Healthy	HC01_bin33	101	22830	46.18	29945.1	91.14	3.48	Bacteria	Bacillota_A	Clostridia	Lachnospirales	Lachnospiraceae	UBA3402	UBA3402 sp003478355	169197	3024454	1811.71	0.59902	55.943	345.295
HC01	Healthy	HC01_bin62	366	23562	37.48	6126.89	90.94	2.71	Bacteria	Bacillota_A	Clostridia	Oscillospirales	Ruminococcaceae	Porcipelethomonas	Porcipelethomonas ammoniilytica	86479	2242440	925.99	0.412938	38.5647	238.031
HC01	Healthy	HC01_bin81	50	35612	55.13	35464.5	89.58	0.96	Bacteria	Bacteroidota	Bacteroidia	Bacteroidales	Rikenellaceae	Alistipes	Alistipes putredinis	106814	1773227	1143.73	0.645	60.2371	371.799
HC01	Healthy	HC01_bin49	186	10845	38.62	13654.3	88.31	4.16	Bacteria	Bacillota_A	Clostridia	Lachnospirales	Lachnospiraceae	Anaerobutyricum	Anaerobutyricum hallii	549004	2539706	5878.56	2.31466	216.168	1334.25
HC01	Healthy	HC01_bin79	222	6411	56.1	8158.64	86.33	0.67	Bacteria	Bacillota_A	Clostridia	Oscillospirales	Butyricicoccaceae	Agathobaculum	Agathobaculum butyriciproducens	85103	1811218	911.256	0.503118	46.9866	290.014
HC01	Healthy	HC01_bin10	447	29068	42.79	9927.72	85.99	1.61	Bacteria	Bacteroidota	Bacteroidia	Bacteroidales	Marinifilaceae	Butyricimonas	Butyricimonas paravirosa	131492	4437693	1407.97	0.317276	29.6307	182.888
HC01	Healthy	HC01_bin4	495	58800	42.21	10422.4	84.9	2.35	Bacteria	Bacteroidota	Bacteroidia	Bacteroidales	Bacteroidaceae	Bacteroides	Unclassified_Bacteroides	179081	5159065	1917.54	0.371684	34.7119	214.251
HC01	Healthy	HC01_bin59	110	25354	58.36	20956.1	79.82	4.46	Bacteria	Bacillota_A	Clostridia	Oscillospirales	Ruminococcaceae	Faecalibacterium	Faecalibacterium duncaniae	466240	2305175	4992.35	2.16571	202.258	1248.39
HC01	Healthy	HC01_bin87	19	241931	29.69	84421.9	78.79	1.34	Bacteria	Bacillota_A	Clostridia	TANB77	CAG-508	CAG-245	CAG-245 sp000435175	1198736	1604017	12835.7	8.00221	747.334	4612.74
HC01	Healthy	HC01_bin53	440	22659	48.3	5488.75	77.34	2.83	Bacteria	Bacillota_A	Clostridia	Lachnospirales	Lachnospiraceae	Gallintestinimicrobium	Gallintestinimicrobium propionicum	110639	2415048	1184.69	0.490544	45.8123	282.766
HC01	Healthy	HC01_bin90	67	25922	29.86	23191.3	77.14	2.24	Bacteria	Bacillota_A	Clostridia	TANB77	CAG-508	JAETTH01	JAETTH01 sp021769225	2323816	1553817	24882.7	16.0139	1495.55	9230.95
HC01	Healthy	HC01_bin91	30	74206	28.24	50802	77	2.57	Bacteria	Bacillota_A	Clostridia	TANB77	CAG-508	CAG-273	CAG-273 sp900752095	145716	1524060	1560.28	1.02377	95.6104	590.132
HC01	Healthy	HC01_bin65	42	46233	43.86	52233.4	76.27	0.72	Bacteria	Bacillota_A	Clostridia	Lachnospirales	Lachnospiraceae	Agathobacter	Agathobacter faecis	116982	2193804	1252.61	0.570975	53.3238	329.129
HC01	Healthy	HC01_bin83	211	7763	42.23	8009.06	76.13	1.79	Bacteria	Bacillota_A	Clostridia	Lachnospirales	Lachnospiraceae	UBA11774	UBA11774 sp003507655	51380	1689912	550.161	0.325556	30.404	187.661
HC01	Healthy	HC01_bin78	191	25160	59.73	9547.32	72.89	0	Bacteria	Bacillota_A	Clostridia	Oscillospirales	Ruminococcaceae	Gemmiger	Gemmiger sp900540775	86443	1823538	925.604	0.507587	47.404	292.59
HC01	Healthy	HC01_bin107	72	15245	28.18	15739.4	71.01	0	Bacteria	Bacillota_A	Clostridia	Peptostreptococcales	Peptostreptococcaceae	Romboutsia	Romboutsia timonensis	59675	1133239	638.981	0.563854	52.6588	325.024
HC02	Healthy	HC02_bin39	20	242590	54.27	89046.1	100	0.12	Bacteria	Actinomycetota	Coriobacteriia	Coriobacteriales	Eggerthellaceae	Anaerotardibacter	Anaerotardibacter sp000435675	625758	1780921	6812.52	3.82528	351.368	1875.61
HC02	Healthy	HC02_bin27	31	346639	56.48	74021.8	100	2.6	Bacteria	Actinomycetota	Actinomycetes	Actinomycetales	Bifidobacteriaceae	Bifidobacterium	Bifidobacterium pseudocatenulatum	1268880	2294675	13814.1	6.02006	552.967	2951.75
HC02	Healthy	HC02_bin2	147	50765	59.43	28619.1	99.41	0	Bacteria	Desulfobacterota	Desulfovibrionia	Desulfovibrionales	Desulfovibrionaceae	Bilophila	Bilophila wadsworthia	661095	4207005	7197.23	1.71077	157.141	838.824
HC02	Healthy	HC02_bin12	60	87317	52.32	50174.1	99.37	0	Bacteria	Bacillota_A	Clostridia	Lachnospirales	Lachnospiraceae	Alitiscatomonas	Alitiscatomonas aceti	188684	3010448	2054.17	0.682347	62.6764	334.568
HC02	Healthy	HC02_bin24	28	428033	56.68	84496	98.66	0	Bacteria	Bacillota_A	Clostridia	Oscillospirales	Acutalibacteraceae	Acutalibacter	Acutalibacter sp900548545	212485	2365887	2313.29	0.977768	89.812	479.418
HC02	Healthy	HC02_bin20	90	28485	48.91	29323.3	98.63	0.63	Bacteria	Bacillota_A	Clostridia	Lachnospirales	Lachnospiraceae	Otoolea	Otoolea fessa	254512	2639095	2770.83	1.04992	96.4391	514.794
HC02	Healthy	HC02_bin10	69	241813	56.44	44235.5	98.39	0.27	Bacteria	Bacillota_A	Clostridia	Christensenellales	Aristaeellaceae	Ventricola	Ventricola sp900542445	367387	3052247	3999.68	1.3104	120.366	642.516
HC02	Healthy	HC02_bin4	98	46523	66.12	36980.4	98.39	2.42	Bacteria	Actinomycetota	Coriobacteriia	Coriobacteriales	Eggerthellaceae	Gordonibacter	Gordonibacter pamelaeae	327463	3624076	3565.03	0.983708	90.3577	482.331
HC02	Healthy	HC02_bin22	49	158235	58.32	50987.3	98.32	0.67	Bacteria	Bacillota_A	Clostridia	Oscillospirales	Oscillospiraceae	Evtepia	Evtepia gabavorous	497367	2498376	5414.75	2.16731	199.076	1062.67
HC02	Healthy	HC02_bin31	52	122488	47.23	42282.3	98.23	0.71	Bacteria	Bacillota_A	Clostridia	Peptostreptococcales	Anaerovoracaceae	Lentihominibacter	Lentihominibacter faecis	127493	2198680	1387.99	0.631285	57.9862	309.531
HC02	Healthy	HC02_bin32	49	262160	39.08	43901.9	97.99	0.34	Bacteria	Bacillota_A	Clostridia	Oscillospirales	Acutalibacteraceae	Ruminococcus_E	Ruminococcus_E intestinalis	950911	2151191	10352.4	4.81241	442.039	2359.61
HC02	Healthy	HC02_bin13	89	101334	38.24	33569.3	97.76	0.81	Bacteria	Bacillota_A	Clostridia	Monoglobales	Monoglobaceae	Monoglobus	Monoglobus pectinilyticus	475722	2987665	5179.1	1.7335	159.229	849.966
HC02	Healthy	HC02_bin37	16	145168	53.2	121051	97.32	0	Bacteria	Bacillota_A	Clostridia	Oscillospirales	Acutalibacteraceae	CAG-217	CAG-217 sp000436335	636282	1936815	6927.09	3.57654	328.52	1753.64
HC02	Healthy	HC02_bin11	108	72616	37.73	28066.9	97.15	1.07	Bacteria	Bacillota_A	Clostridia	UBA1381	UBA1381	Hominilimicola	Hominilimicola fabiformis	934253	3031223	10171.1	3.35543	308.21	1645.23
HC02	Healthy	HC02_bin34	33	140785	57.63	63851.7	96.94	0	Bacteria	Actinomycetota	Coriobacteriia	Coriobacteriales	Eggerthellaceae	Slackia	Slackia isoflavoniconvertens	1133693	2107105	12342.3	5.85748	538.033	2872.03
HC02	Healthy	HC02_bin17	79	70649	38.47	35541.9	96.31	0.67	Bacteria	Bacillota_A	Clostridia	Lachnospirales	Lachnospiraceae	Anaerobutyricum	Anaerobutyricum hallii	603782	2807809	6573.27	2.34107	215.037	1147.87
HC02	Healthy	HC02_bin14	142	26069	57.53	20771	96.02	3.06	Bacteria	Bacillota_A	Clostridia	Oscillospirales	Ruminococcaceae	Gemmiger	Gemmiger sp900539695	564674	2949489	6147.51	2.08426	191.448	1021.95
HC02	Healthy	HC02_bin21	57	243886	48.52	44163.9	95.62	0.73	Bacteria	Pseudomonadota	Gammaproteobacteria	Burkholderiales	Burkholderiaceae	Parasutterella	Parasutterella excrementihominis	194830	2517342	2121.08	0.842588	77.3951	413.137
HC02	Healthy	HC02_bin19	42	135261	63.53	62888.8	95.16	0	Bacteria	Actinomycetota	Coriobacteriia	Coriobacteriales	Eggerthellaceae	Adlercreutzia	Adlercreutzia rubneri	337937	2641330	3679.06	1.39288	127.942	682.957
HC02	Healthy	HC02_bin30	85	132169	55.61	25916.2	93.96	0.78	Bacteria	Bacillota_A	Clostridia	Oscillospirales	Butyricicoccaceae	Agathobaculum	Agathobaculum butyriciproducens	361238	2202873	3932.74	1.78528	163.985	875.354
HC02	Healthy	HC02_bin29	194	19466	42.47	11366.2	93.64	2.01	Bacteria	Bacillota_A	Clostridia	Lachnospirales	Lachnospiraceae	Agathobacter	Agathobacter rectalis	645631	2205037	7028.87	3.18764	292.798	1562.96
HC02	Healthy	HC02_bin33	116	66128	60.43	18465.4	93.45	0.12	Bacteria	Actinomycetota	Actinomycetes	Actinomycetales	Bifidobacteriaceae	Bifidobacterium	Bifidobacterium longum	993484	2141990	10815.9	5.04946	463.814	2475.84
HC02	Healthy	HC02_bin23	82	115855	29.14	29153.2	93.4	0	Bacteria	Bacillota_I	Bacilli_A	Erysipelotrichales	Coprobacillaceae	Faecalibacillus	Faecalibacillus intestinalis	429476	2390558	4675.63	1.95587	179.655	959.002
HC02	Healthy	HC02_bin3	122	86972	42.2	34427.8	91.11	0.8	Bacteria	Bacteroidota	Bacteroidia	Bacteroidales	Bacteroidaceae	Phocaeicola	Phocaeicola vulgatus	2280179	4200196	24823.9	5.91018	542.874	2897.87
HC02	Healthy	HC02_bin15	64	54511	46.89	44863.7	89.16	1.45	Bacteria	Bacillota_A	Clostridia	Lachnospirales	Lachnospiraceae	Acetatifactor	Acetatifactor acetigignens	498631	2871278	5428.51	1.89063	173.662	927.009
HC02	Healthy	HC02_bin8	319	16706	45.84	10494.9	88.08	0.19	Bacteria	Bacteroidota	Bacteroidia	Bacteroidales	Tannerellaceae	Parabacteroides	Parabacteroides distasonis	1556926	3347856	16950	5.06294	465.052	2482.45
HC02	Healthy	HC02_bin43	15	121112	55.06	116251	83.57	0.96	Bacteria	Bacteroidota	Bacteroidia	Bacteroidales	Rikenellaceae	Alistipes	Alistipes putredinis	126248	1743758	1374.44	0.788206	72.4	386.472
HC02	Healthy	HC02_bin28	35	80813	43.56	64027.7	80.7	1.17	Bacteria	Bacillota_A	Clostridia	Lachnospirales	Lachnospiraceae	Bariatricus	Bariatricus comes	1059549	2240968	11535.1	5.14739	472.809	2523.86
HC02	Healthy	HC02_bin49	199	22163	38.83	7627.83	78.44	0.67	Bacteria	Bacillota_A	Clostridia	Oscillospirales	Acutalibacteraceae	UMGS1071	UMGS1071 sp900542375	42835	1517938	466.337	0.307218	28.2192	150.635
HC02	Healthy	HC02_bin42	114	56231	60.23	15310	78.05	1.36	Bacteria	Bacillota_A	Clostridia	Oscillospirales	Ruminococcaceae	Faecalibacterium	Faecalibacterium longum	513091	1745346	5585.93	3.20047	293.977	1569.25
HC02	Healthy	HC02_bin47	187	5893	38.62	8467.48	74.04	0	Bacteria	Bacillota_A	Clostridia	Lachnospirales	Lachnospiraceae	Lachnospira	Lachnospira sp003451515	55340	1583418	602.477	0.380492	34.9497	186.562
HC03	Healthy	HC03_bin38	31	357607	56.69	75350.2	100	0.45	Bacteria	Actinomycetota	Actinomycetes	Actinomycetales	Bifidobacteriaceae	Bifidobacterium	Bifidobacterium pseudocatenulatum	670567	2335857	11265.7	4.82296	287.075	2923.42
HC03	Healthy	HC03_bin14	60	84531	64.06	53784.7	100	0.81	Bacteria	Actinomycetota	Coriobacteriia	Coriobacteriales	Eggerthellaceae	Eggerthella	Eggerthella lenta	296070	3227084	4974.07	1.54135	91.7454	934.285
HC03	Healthy	HC03_bin45	63	60801	59.84	34587.7	100	0.81	Bacteria	Actinomycetota	Coriobacteriia	Coriobacteriales	Coriobacteriaceae	Collinsella	Unclassified_Collinsella	1865571	2179024	31342.2	14.3836	856.15	8718.57
HC03	Healthy	HC03_bin48	16	233320	54.41	112474	100	0.92	Bacteria	Actinomycetota	Coriobacteriia	Coriobacteriales	Eggerthellaceae	Anaerotardibacter	Anaerotardibacter sp000435675	641343	1799585	10774.8	5.98736	356.384	3629.22
HC03	Healthy	HC03_bin24	189	95969	59.83	14422.8	100	1.27	Bacteria	Actinomycetota	Actinomycetes	Actinomycetales	Bifidobacteriaceae	Bifidobacterium	Bifidobacterium longum	1130255	2725914	18988.6	6.96597	414.633	4222.4
HC03	Healthy	HC03_bin6	183	39033	41.48	20783.4	99.52	0.05	Bacteria	Bacillota_A	Clostridia	Lachnospirales	Lachnospiraceae	Roseburia	Roseburia inulinivorans	858393	3803370	14421.3	3.79171	225.693	2298.33
HC03	Healthy	HC03_bin19	130	18917	41.17	22695.6	99.42	4.19	Bacteria	Bacillota_A	Clostridia	Lachnospirales	Lachnospiraceae	Mediterraneibacter	Mediterraneibacter torques	595007	2950433	9996.31	3.38808	201.668	2053.67
HC03	Healthy	HC03_bin39	39	582399	41.05	59760.9	99.33	2.01	Bacteria	Bacillota_A	Clostridia	Oscillospirales	Acutalibacteraceae	Ruminococcus_E	Ruminococcus_E bromii_B	1453089	2330676	24412.4	10.4744	623.462	6349
HC03	Healthy	HC03_bin4	93	334690	45.8	42628.4	99.19	2.12	Bacteria	Bacteroidota	Bacteroidia	Bacteroidales	Bacteroidaceae	Bacteroides	Bacteroides stercoris	372681	3964446	6261.16	1.57933	94.0058	957.304
HC03	Healthy	HC03_bin12	168	23044	56.33	19385.7	99.18	3.76	Bacteria	Bacillota_A	Clostridia	Oscillospirales	Ruminococcaceae	Faecalibacterium	Faecalibacterium duncaniae	1141649	3256803	19180.1	5.88923	350.543	3569.74
HC03	Healthy	HC03_bin30	84	115147	29.08	30755.8	99.06	0	Bacteria	Bacillota_I	Bacilli_A	Erysipelotrichales	Coprobacillaceae	Faecalibacillus	Faecalibacillus intestinalis	3150135	2583489	52923.3	20.4852	1219.33	12417
HC03	Healthy	HC03_bin1	244	99268	42.15	21930.5	98.87	0.38	Bacteria	Bacteroidota	Bacteroidia	Bacteroidales	Bacteroidaceae	Phocaeicola	Phocaeicola vulgatus	432760	5351050	7270.51	1.35871	80.8738	823.575
HC03	Healthy	HC03_bin28	51	296185	38.32	51783.2	98.66	0.67	Bacteria	Bacillota_A	Clostridia	UBA1381	UBA1381	Hominilimicola	Hominilimicola fabiformis	321484	2640943	5401.03	2.04512	121.731	1239.64
HC03	Healthy	HC03_bin36	68	34817	34.36	35061.7	98.66	2.35	Bacteria	Bacillota_A	Clostridia	Lachnospirales	Lachnospiraceae	Eubacterium_G	Eubacterium_G ventriosum	279259	2384194	4691.64	1.96781	117.129	1192.78
HC03	Healthy	HC03_bin41	116	50326	49.16	19744.5	98.12	0.62	Bacteria	Pseudomonadota	Gammaproteobacteria	Burkholderiales	Burkholderiaceae	Parasutterella	Parasutterella gallistercoris	177600	2290368	2983.74	1.30273	77.5421	789.647
HC03	Healthy	HC03_bin32	49	100628	54.85	51023	97.99	0.67	Bacteria	Bacillota_A	Clostridia	Oscillospirales	Butyricicoccaceae	Agathobaculum	Agathobaculum butyriciproducens	287873	2500126	4836.36	1.93445	115.143	1172.56
HC03	Healthy	HC03_bin15	24	72684	44.59	130427	97.84	2.93	Bacteria	Bacillota	Bacilli	Lactobacillales	Lactobacillaceae	Lactiplantibacillus	Lactiplantibacillus plantarum	391305	3130243	6574.05	2.10017	125.008	1273.01
HC03	Healthy	HC03_bin21	178	23723	27.13	16382.8	97.77	0.7	Bacteria	Bacillota_A	Clostridia	Peptostreptococcales	Peptostreptococcaceae	Romboutsia	Romboutsia timonensis	469702	2916131	7891.14	2.70603	161.07	1640.25
HC03	Healthy	HC03_bin5	149	44557	44.03	26412.2	97.45	3.22	Bacteria	Bacillota_A	Clostridia	Lachnospirales	Lachnospiraceae	Enterocloster	Enterocloster sp000431375	393162	3935421	6605.25	1.67841	99.9034	1017.36
HC03	Healthy	HC03_bin46	55	152120	43.77	39617.9	97.32	0.67	Bacteria	Bacillota_A	Clostridia	Oscillospirales	Acutalibacteraceae	Eubacterium_R	Eubacterium_R sp000433975	1423957	2178986	23922.9	10.9789	653.495	6654.84
HC03	Healthy	HC03_bin10	218	12587	36.68	15342.6	96.98	3.36	Bacteria	Bacillota_A	Clostridia	Lachnospirales	Lachnospiraceae	Anaerostipes	Anaerostipes hadrus	1187800	3344698	19955.4	5.96628	355.129	3616.44
HC03	Healthy	HC03_bin18	77	34541	44.22	38385.8	96.2	3.52	Bacteria	Bacillota_A	Clostridia	Lachnospirales	Lachnospiraceae	Oliverpabstia	Oliverpabstia intestinalis	537703	2955709	9033.58	3.05632	181.92	1852.58
HC03	Healthy	HC03_bin37	109	118891	58.67	21602.1	96.07	3.74	Bacteria	Bacillota_A	Clostridia	Oscillospirales	Ruminococcaceae	Faecalibacterium	Faecalibacterium longum	418936	2354629	7038.26	2.98912	177.92	1811.84
HC03	Healthy	HC03_bin9	143	88542	42.88	24455.3	95.91	3.78	Bacteria	Bacillota_A	Clostridia	Lachnospirales	Lachnospiraceae	Agathobacter	Agathobacter faecis	1403055	3497108	23571.8	6.74036	401.204	4085.65
HC03	Healthy	HC03_bin25	109	37538	43.06	24698	95.73	4.11	Bacteria	Bacillota_A	Clostridia	Lachnospirales	Lachnospiraceae	Blautia_A	Blautia_A sp900066355	283780	2692080	4767.59	1.77097	105.413	1073.47
HC03	Healthy	HC03_bin29	282	21546	36.22	9258.59	95.6	0.02	Bacteria	Bacillota_A	Clostridia	Lachnospirales	Lachnospiraceae	Lachnospira	Lachnospira pectinoschiza_A	122854	2610921	2063.99	0.79052	47.0539	479.171
HC03	Healthy	HC03_bin43	70	42260	43.56	31665.9	94.19	2.92	Bacteria	Bacillota_A	Clostridia	Lachnospirales	Lachnospiraceae	Lachnoclostridium_B	Lachnoclostridium_B ammoniilytica	135474	2216612	2276.01	1.0268	61.1176	622.388
HC03	Healthy	HC03_bin22	82	24701	38.26	34254.6	93.29	0.73	Bacteria	Bacillota_A	Clostridia	Lachnospirales	Lachnospiraceae	Anaerobutyricum	Anaerobutyricum hallii	957908	2808877	16093.2	5.72939	341.029	3472.85
HC03	Healthy	HC03_bin27	139	25711	63.29	19264.6	93.01	0.27	Bacteria	Actinomycetota	Coriobacteriia	Coriobacteriales	Eggerthellaceae	Adlercreutzia	Adlercreutzia equolifaciens	685458	2677785	11515.9	4.30054	255.979	2606.76
HC03	Healthy	HC03_bin40	86	87529	56.68	26940.2	92.67	0.51	Bacteria	Bacillota_A	Clostridia	Oscillospirales	Ruminococcaceae	Faecalibacterium	Faecalibacterium prausnitzii_D	317207	2316859	5329.18	2.30017	136.913	1394.24
HC03	Healthy	HC03_bin35	47	48279	40.98	51484.9	91.99	0.58	Bacteria	Bacillota_A	Clostridia	Lachnospirales	Lachnospiraceae	Dorea	Dorea formicigenerans	840876	2419790	14127	5.8381	347.5	3538.75
HC03	Healthy	HC03_bin8	346	22644	41.13	10613.6	91.03	4.95	Bacteria	Bacillota_A	Clostridia	Lachnospirales	Lachnospiraceae	Blautia_A	Blautia_A wexlerae	5638712	3672299	94732.2	25.7964	1535.47	15636.4
HC03	Healthy	HC03_bin34	65	44492	42.08	37911	89.29	0	Bacteria	Bacillota_A	Clostridia	Lachnospirales	Lachnospiraceae	Blautia_A	Blautia_A obeum	638545	2464216	10727.8	4.35342	259.127	2638.81
HC03	Healthy	HC03_bin47	267	9614	44.27	7522.03	88.88	2.1	Bacteria	Bacillota_C	Negativicutes	Acidaminococcales	Acidaminococcaceae	Phascolarctobacterium	Phascolarctobacterium faecium	68351	2008382	1148.32	0.571763	34.0329	346.572
HC03	Healthy	HC03_bin31	58	142750	48.64	43669.7	88.38	1.05	Bacteria	Bacillota_A	Clostridia	Lachnospirales	Lachnospiraceae	Otoolea	Otoolea fessa	484335	2532841	8136.98	3.21259	191.222	1947.3
HC03	Healthy	HC03_bin11	245	15209	43.16	13599.1	87.42	2.53	Bacteria	Bacillota_A	Clostridia	Lachnospirales	Lachnospiraceae	Blautia_A	Blautia_A faecis	185107	3331772	3109.86	0.933394	55.5581	565.774
HC03	Healthy	HC03_bin17	257	27380	40.99	11654.4	80.97	2.22	Bacteria	Bacillota_A	Clostridia	Lachnospirales	Lachnospiraceae	Anthropogastromicrobium	Anthropogastromicrobium aceti	137213	2995185	2305.22	0.769643	45.8112	466.516
HC03	Healthy	HC03_bin20	44	39150	38.58	66588.4	80.7	0	Bacteria	Bacillota_A	Clostridia	Lachnospirales	Lachnospiraceae	Blautia	Blautia stercoris	738083	2929891	12400	4.23225	251.915	2565.36
HC03	Healthy	HC03_bin42	111	19691	44.13	20035.5	76.3	3.38	Bacteria	Bacillota_A	Clostridia	Lachnospirales	Lachnospiraceae	Blautia_A	Blautia_A caecimuris	127063	2223942	2134.7	0.959872	57.1341	581.823
HC04	Healthy	HC04_bin111	17	275687	54.52	106989	100	0.12	Bacteria	Actinomycetota	Coriobacteriia	Coriobacteriales	Eggerthellaceae	Anaerotardibacter	Anaerotardibacter sp900538545	1148137	1818812	11176.9	6.14515	631.257	3980.29
HC04	Healthy	HC04_bin78	108	24420	51.48	22417.6	100	1.55	Bacteria	Bacillota_C	Negativicutes	Veillonellales	Dialisteraceae	Dialister	Dialister sp900543165	1777755	2421102	17306.1	7.14802	734.275	4629.86
HC04	Healthy	HC04_bin38	85	29569	48.21	33665.3	100	2.53	Bacteria	Bacillota_A	Clostridia	Lachnospirales	Lachnospiraceae	Otoolea	Otoolea fessa	254018	2861552	2472.81	0.864151	88.7693	559.722
HC04	Healthy	HC04_bin34	121	6889	41.39	23916.3	99.42	1.91	Bacteria	Bacillota_A	Clostridia	Lachnospirales	Lachnospiraceae	Dorea_A	Dorea_A longicatena	1004897	2893867	9782.46	3.38041	347.251	2189.54
HC04	Healthy	HC04_bin16	212	17943	59.42	16345.8	99.41	0.39	Bacteria	Desulfobacterota	Desulfovibrionia	Desulfovibrionales	Desulfovibrionaceae	Mailhella	Mailhella excrementigallinarum	125397	3465302	1220.71	0.352268	36.1865	228.168
HC04	Healthy	HC04_bin62	143	68282	42.65	18334.2	99.39	0.03	Bacteria	Bacillota_A	Clostridia	Lachnospirales	Lachnospiraceae	Mediterraneibacter	Mediterraneibacter lactaris	259032	2621789	2521.62	0.961795	98.7997	622.967
HC04	Healthy	HC04_bin21	84	142850	49.57	38140.8	99.33	0	Bacteria	Bacillota_A	Clostridia	Oscillospirales	Acutalibacteraceae	Clostridium_A	Clostridium_A leptum	405844	3203830	3950.81	1.23315	126.675	798.728
HC04	Healthy	HC04_bin61	83	249797	37.45	31647.4	99.33	0	Bacteria	Bacillota_A	Clostridia	Oscillospirales	Ruminococcaceae	Porcipelethomonas	Porcipelethomonas ammoniilytica	630127	2626735	6134.16	2.33528	239.89	1512.59
HC04	Healthy	HC04_bin46	28	187230	43.8	98863.7	99.33	0.67	Bacteria	Bacillota_A	Clostridia	Lachnospirales	Lachnospiraceae	Frisingicoccus	Frisingicoccus sp902471845	229966	2768184	2238.67	0.808715	83.0747	523.815
HC04	Healthy	HC04_bin95	68	59664	60.11	32392.5	99.19	2.6	Bacteria	Actinomycetota	Coriobacteriia	Coriobacteriales	Coriobacteriaceae	Collinsella	Unclassified_Collinsella	1224826	2202687	11923.4	5.41313	556.06	3506.15
HC04	Healthy	HC04_bin51	70	69960	40.76	39008.7	99.03	0.9	Bacteria	Bacillota_A	Clostridia	Lachnospirales	Lachnospiraceae	Roseburia_C	Roseburia_C amylophila	494420	2730611	4813.08	1.76264	181.066	1141.68
HC04	Healthy	HC04_bin19	86	146577	56.57	37926.2	98.99	0.67	Bacteria	Bacillota_A	Clostridia	Oscillospirales	Acutalibacteraceae	Caccousia	Caccousia sp900752115	318193	3261653	3097.54	0.949685	97.5557	615.123
HC04	Healthy	HC04_bin42	73	148277	45.01	38287.3	98.99	0.67	Bacteria	Bacillota_A	Clostridia	Oscillospirales	Ruminococcaceae	Ruminiclostridium_E	Ruminiclostridium_E siraeum	1504695	2794976	14647.9	5.24079	538.357	3394.53
HC04	Healthy	HC04_bin26	53	272932	49.32	58534.9	98.96	3.54	Bacteria	Bacillota_A	Clostridia	Lachnospirales	Lachnospiraceae	Roseburia	Roseburia hominis	347288	3102352	3380.78	1.08975	111.943	705.843
HC04	Healthy	HC04_bin37	118	147503	27.08	24379.1	98.94	0	Bacteria	Bacillota_A	Clostridia	Peptostreptococcales	Peptostreptococcaceae	Romboutsia	Romboutsia timonensis	244875	2876732	2383.81	0.828651	85.1226	536.728
HC04	Healthy	HC04_bin58	111	5953	42.1	24181.7	98.83	0.61	Bacteria	Bacillota_A	Clostridia	Lachnospirales	Lachnospiraceae	Mediterraneibacter	Mediterraneibacter torques	485066	2684171	4722.02	1.75921	180.714	1139.46
HC04	Healthy	HC04_bin31	125	54430	42.41	23666.8	98.83	1.75	Bacteria	Bacillota_A	Clostridia	Lachnospirales	Lachnospiraceae	Bariatricus	Bariatricus comes	724000	2958356	7047.99	2.3824	244.731	1543.11
HC04	Healthy	HC04_bin32	72	87238	49.04	40618.6	98.76	4.22	Bacteria	Bacillota_A	Clostridia	Oscillospirales	Acutalibacteraceae	Anaeromassilibacillus	Anaeromassilibacillus sp001305115	193951	2924540	1888.07	0.645596	66.3185	418.161
HC04	Healthy	HC04_bin9	114	129791	47.64	33092.9	98.73	3.8	Bacteria	Bacillota_A	Clostridia	Lachnospirales	Lachnospiraceae	Choladousia	Choladousia sp902363665	762627	3772586	7424.02	1.96788	202.15	1274.62
HC04	Healthy	HC04_bin43	58	46541	40.64	48148.6	98.66	0	Bacteria	Bacillota_A	Clostridia	Lachnospirales	Lachnospiraceae	Eubacterium_F	Eubacterium_F sp003491505	402892	2792616	3922.07	1.40444	144.27	909.676
HC04	Healthy	HC04_bin76	103	10823	34.8	23830.1	98.66	1.81	Bacteria	Bacillota_A	Clostridia	Lachnospirales	Lachnospiraceae	Eubacterium_G	Eubacterium_G sp900548465	135337	2454497	1317.48	0.536761	55.1384	347.667
HC04	Healthy	HC04_bin94	32	272800	56.81	69260.5	98.66	2.01	Bacteria	Bacillota_A	Clostridia	Oscillospirales	Oscillospiraceae	Onthomonas	Onthomonas sp003150485	269772	2216335	2626.17	1.18492	121.72	767.487
HC04	Healthy	HC04_bin17	116	169377	47.57	28450.7	98.66	3.33	Bacteria	Bacillota_A	Clostridia	Lachnospirales	Lachnospiraceae	Gallintestinimicrobium	Gallintestinimicrobium propionicum	1435403	3300280	13973.3	4.23399	434.934	2742.41
HC04	Healthy	HC04_bin96	44	171664	48.55	50050.9	98.66	3.36	Bacteria	Bacillota_A	Clostridia	Oscillospirales	Ruminococcaceae	UBA3818	UBA3818 sp900557155	146613	2202239	1427.25	0.648089	66.5745	419.776
HC04	Healthy	HC04_bin90	36	176848	54.3	62972.4	98.56	2.53	Bacteria	Bacteroidota	Bacteroidia	Bacteroidales	Rikenellaceae	Alistipes	Alistipes putredinis	302321	2267007	2943.03	1.2982	133.357	840.862
HC04	Healthy	HC04_bin69	106	14823	53.31	23898.2	98.11	0.94	Bacteria	Bacillota_I	Bacilli_A	Erysipelotrichales	Erysipelotrichaceae	Merdibacter	Merdibacter merdipullorum	186528	2533204	1815.81	0.716804	73.6332	464.283
HC04	Healthy	HC04_bin36	75	64955	53.38	38453.8	98.03	0.89	Bacteria	Bacteroidota	Bacteroidia	Bacteroidales	Bacteroidaceae	Prevotella	Prevotella sp003447235	299042	2884037	2911.11	1.00939	103.689	653.794
HC04	Healthy	HC04_bin22	103	130403	57.88	30988.3	97.99	3.02	Bacteria	Bacillota_A	Clostridia	Oscillospirales	Acutalibacteraceae	Hominenteromicrobium	Hominenteromicrobium sp900549945	333280	3191792	3244.41	1.01649	104.418	658.391
HC04	Healthy	HC04_bin45	38	465681	55.31	73030.3	97.96	0	Bacteria	Verrucomicrobiota	Verrucomicrobiae	Verrucomicrobiales	Akkermansiaceae	Akkermansia	Akkermansia muciniphila	1380316	2775150	13437.1	4.84193	497.384	3136.18
HC04	Healthy	HC04_bin64	72	190681	58.04	36019.9	97.65	3.19	Bacteria	Bacillota_A	Clostridia	Oscillospirales	Oscillospiraceae	Evtepia	Evtepia gabavorous	441559	2593431	4298.49	1.65745	170.261	1073.55
HC04	Healthy	HC04_bin28	60	101757	56.54	50918.7	97.58	0.27	Bacteria	Bacillota_A	Clostridia	Christensenellales	Aristaeellaceae	Ventricola	Ventricola sp900542445	892286	3055123	8686.22	2.84316	292.062	1841.56
HC04	Healthy	HC04_bin30	125	49794	60.36	23796.1	97.58	3.16	Bacteria	Bacillota_A	Clostridia	Christensenellales	Aristaeellaceae	Limiplasma	Limiplasma merdipullorum	196402	2974510	1911.93	0.642772	66.0284	416.332
HC04	Healthy	HC04_bin12	115	30416	41.06	31562	97.47	0.95	Bacteria	Bacillota_A	Clostridia	Lachnospirales	Lachnospiraceae	Anthropogastromicrobium	Anthropogastromicrobium aceti	549026	3629636	5344.65	1.4725	151.262	953.76
HC04	Healthy	HC04_bin68	77	123232	41.13	33281.8	97.37	1.17	Bacteria	Bacillota_A	Clostridia	Lachnospirales	Lachnospiraceae	Mediterraneibacter	Mediterraneibacter faecis	316894	2562702	3084.9	1.20377	123.656	779.696
HC04	Healthy	HC04_bin25	76	84196	52.44	41025.9	97.35	0.63	Bacteria	Bacillota_A	Clostridia	Lachnospirales	Lachnospiraceae	Alitiscatomonas	Alitiscatomonas aceti	620768	3117972	6043.05	1.93813	199.094	1255.35
HC04	Healthy	HC04_bin89	51	59630	51.76	45102.2	97.32	0.67	Bacteria	Bacillota_A	Clostridia	Oscillospirales	Ruminococcaceae	Negativibacillus	Negativibacillus sp000435195	319582	2300210	3111.06	1.35251	138.936	876.04
HC04	Healthy	HC04_bin2	252	40187	42.08	18820.1	97.24	0.51	Bacteria	Bacteroidota	Bacteroidia	Bacteroidales	Bacteroidaceae	Phocaeicola	Phocaeicola vulgatus	999282	4742661	9727.8	2.05113	210.701	1328.54
HC04	Healthy	HC04_bin55	111	8781	47.61	24302.1	97.16	0.71	Bacteria	Bacillota_A	Clostridia	Peptostreptococcales	Anaerovoracaceae	Hominibacterium	Hominibacterium hominis	122324	2697534	1190.8	0.44144	45.3466	285.926
HC04	Healthy	HC04_bin56	103	46574	41.65	26150.8	97.15	0	Bacteria	Bacillota_A	Clostridia	Lachnospirales	Lachnospiraceae	Agathobacter	Agathobacter rectalis	223022	2693537	2171.07	0.80603	82.7989	522.076
HC04	Healthy	HC04_bin103	126	7483	53.21	16372.6	96.77	1.08	Bacteria	Bacillota_A	Clostridia	Christensenellales	CAG-138	SFEL01	SFEL01 sp004557245	89153	2062952	867.886	0.420701	43.2162	272.494
HC04	Healthy	HC04_bin4	120	222796	44.51	34159.2	96.65	1.36	Bacteria	Bacteroidota	Bacteroidia	Bacteroidales	Bacteroidaceae	Phocaeicola	Phocaeicola plebeius_A	862552	4099100	8396.76	2.04844	210.425	1326.8
HC04	Healthy	HC04_bin77	41	232649	53.17	59553.7	96.64	0	Bacteria	Bacillota_A	Clostridia	Oscillospirales	Acutalibacteraceae	Hominenteromicrobium	Hominenteromicrobium mulieris	203358	2441703	1979.65	0.810765	83.2853	525.143
HC04	Healthy	HC04_bin104	35	558324	44.17	57413.1	96.64	0.34	Bacteria	Bacillota_A	Clostridia	Oscillospirales	Acutalibacteraceae	Fimenecus	Fimenecus sp000432435	654030	2009459	6366.85	3.16844	325.476	2052.24
HC04	Healthy	HC04_bin99	30	359817	47.56	71938.6	96.64	0.36	Bacteria	Bacillota_A	Clostridia	Lachnospirales	Anaerotignaceae	Anaerotignum	Anaerotignum faecicola	117649	2158157	1145.29	0.530679	54.5136	343.728
HC04	Healthy	HC04_bin100	159	86204	50.58	13526	96.54	0	Bacteria	Bacillota_A	Clostridia	Monoglobales	Monoglobaceae	Ructibacterium	Ructibacterium sp900550775	69304	2150637	674.66	0.313702	32.2249	203.189
HC04	Healthy	HC04_bin23	297	43753	55.21	10721.2	96.37	1.25	Bacteria	Bacillota_A	Clostridia	Oscillospirales	Ruminococcaceae	Gemmiger	Gemmiger qucibialis	3418060	3184192	33274.1	10.4498	1073.45	6768.46
HC04	Healthy	HC04_bin67	31	69453	58.37	83387.3	96.33	1.97	Bacteria	Desulfobacterota	Desulfovibrionia	Desulfovibrionales	Desulfovibrionaceae	Desulfovibrio	Desulfovibrio sp900319575	1042675	2585005	10150.2	3.92658	403.355	2543.3
HC04	Healthy	HC04_bin49	44	160513	48.39	62329.1	96	0.74	Bacteria	Bacteroidota	Bacteroidia	Bacteroidales	Bacteroidaceae	UBA6398	UBA6398 sp900550635	506823	2742480	4933.82	1.79903	184.805	1165.26
HC04	Healthy	HC04_bin66	67	71082	36.39	38644.6	95.97	1.34	Bacteria	Bacillota_A	Clostridia	Lachnospirales	Lachnospiraceae	Lachnospira	Lachnospira hominis	429125	2589187	4177.44	1.61342	165.737	1045.03
HC04	Healthy	HC04_bin6	228	28598	59.66	17082.6	95.86	0	Bacteria	Desulfobacterota	Desulfovibrionia	Desulfovibrionales	Desulfovibrionaceae	Bilophila	Bilophila wadsworthia	157701	3894824	1535.19	0.394161	40.4899	255.303
HC04	Healthy	HC04_bin57	73	61336	44.97	36814.5	95.78	1.37	Bacteria	Bacillota_A	Clostridia	Lachnospirales	Lachnospiraceae	UMGS1370	UMGS1370 sp900542035	137220	2687456	1335.81	0.497053	51.0594	321.948
HC04	Healthy	HC04_bin60	77	76546	41.19	34130.2	95.75	0.93	Bacteria	Bacillota_A	Clostridia	Lachnospirales	Lachnospiraceae	Dorea	Dorea formicigenerans	958663	2628027	9332.38	3.5511	364.784	2300.09
HC04	Healthy	HC04_bin92	53	56151	43.75	42449.4	95.71	1.02	Bacteria	Bacillota_A	Clostridia	Lachnospirales	Lachnospiraceae	Lachnoclostridium_B	Lachnoclostridium_B ammoniilytica	166212	2249817	1618.04	0.719187	73.878	465.827
HC04	Healthy	HC04_bin81	112	29697	58.42	21377.5	95.65	3.36	Bacteria	Bacillota_A	Clostridia	Oscillospirales	Oscillospiraceae	Lawsonibacter	Unclassified_Lawsonibacter	108682	2394282	1058	0.441885	45.3923	286.215
HC04	Healthy	HC04_bin73	224	39827	36.64	10998.7	95.38	3.94	Bacteria	Bacillota_A	Clostridia	Lachnospirales	Lachnospiraceae	Anaerostipes	Anaerostipes amylophilus	725509	2463713	7062.68	2.86668	294.478	1856.79
HC04	Healthy	HC04_bin29	159	26868	38.31	19157.4	95.3	0.67	Bacteria	Bacillota_A	Clostridia	UBA1381	UBA1381	Hominilimicola	Hominilimicola fabiformis	1252918	3046027	12196.9	4.0042	411.329	2593.57
HC04	Healthy	HC04_bin40	118	67705	42.86	24196.8	95.04	3.29	Bacteria	Bacillota_A	Clostridia	Lachnospirales	Lachnospiraceae	Blautia_A	Blautia_A sp900066355	387727	2855216	3774.44	1.32195	135.796	856.242
HC04	Healthy	HC04_bin102	17	129926	59.43	125110	95	0.61	Bacteria	Actinomycetota	Actinomycetes	Actinomycetales	Bifidobacteriaceae	Bifidobacterium	Bifidobacterium adolescentis	150931	2126870	1469.28	0.690819	70.9639	447.452
HC04	Healthy	HC04_bin118	80	7064	48.99	19952.5	94.9	0.62	Bacteria	Pseudomonadota	Gammaproteobacteria	Burkholderiales	Burkholderiaceae	Aphodousia	Unclassified_Aphodousia	57926	1596200	563.898	0.353275	36.2899	228.821
HC04	Healthy	HC04_bin20	195	13447	41.83	16587.5	94.83	1.03	Bacteria	Bacillota_A	Clostridia	Lachnospirales	Lachnospiraceae	Roseburia	Roseburia inulinivorans	294459	3234563	2866.5	0.886208	91.0352	574.009
HC04	Healthy	HC04_bin83	71	16818	56.65	33589.8	94.63	2.03	Bacteria	Bacillota_A	Clostridia	Oscillospirales	Oscillospiraceae	CAG-170	CAG-170 sp900549635	191655	2384879	1865.72	0.782313	80.3626	506.714
HC04	Healthy	HC04_bin108	163	19097	38.58	11331.5	94.39	0.73	Bacteria	Bacillota_A	Clostridia	Oscillospirales	Acutalibacteraceae	UMGS1071	UMGS1071 sp900542375	57531	1847030	560.052	0.303218	31.1478	196.398
HC04	Healthy	HC04_bin8	137	71815	41.38	27986.4	94.14	4.9	Bacteria	Bacillota_A	Clostridia	Lachnospirales	Lachnospiraceae	COE1	COE1 sp001916965	1127347	3834139	10974.5	2.86231	294.029	1853.95
HC04	Healthy	HC04_bin39	99	17696	43.17	28840.8	93.96	0.69	Bacteria	Bacillota_A	Clostridia	Lachnospirales	Lachnospiraceae	Coprococcus	Coprococcus eutactus	130345	2855238	1268.88	0.444405	45.6512	287.847
HC04	Healthy	HC04_bin126	51	83031	26.87	26006.9	93.82	0	Bacteria	Bacillota_I	Bacilli_A	RF39	UBA660	Scybalousia	Scybalousia sp900542735	105860	1326350	1030.53	0.776963	79.813	503.249
HC04	Healthy	HC04_bin53	109	26372	53.71	24942.2	93.37	0.17	Bacteria	Bacillota_A	Clostridia	Oscillospirales	Acutalibacteraceae	Anaeromassilibacillus	Anaeromassilibacillus stercoravium	129528	2718704	1260.93	0.463798	47.6433	300.408
HC04	Healthy	HC04_bin72	174	9721	58.16	14262.5	92.91	1.15	Bacteria	Bacillota_A	Clostridia	Christensenellales	Aristaeellaceae	SFMI01	SFMI01 sp004556155	85804	2481666	835.284	0.336582	34.5752	218.009
HC04	Healthy	HC04_bin87	63	29788	59.1	36562.1	92.62	4.09	Bacteria	Bacillota_A	Clostridia	Oscillospirales	Oscillospiraceae	CAG-170	CAG-170 sp000436735	473677	2303415	4611.15	2.00187	205.641	1296.64
HC04	Healthy	HC04_bin97	237	7544	49.81	9170.47	92.51	0.89	Bacteria	Bacillota_A	Clostridia	Lachnospirales	Bianqueaceae	Faecimorpha	Faecimorpha stercoravium	61754	2173402	601.162	0.2766	28.4135	179.157
HC04	Healthy	HC04_bin44	211	5245	43.59	13152.7	92.26	0.19	Bacteria	Bacteroidota	Bacteroidia	Bacteroidales	Barnesiellaceae	Barnesiella	Barnesiella intestinihominis	87527	2775211	852.057	0.307024	31.5389	198.864
HC04	Healthy	HC04_bin79	230	4631	45.66	10464.6	92.23	3.82	Bacteria	Bacillota_A	Clostridia	Lachnospirales	Lachnospiraceae	Hominiventricola	Hominiventricola sp003480725	111565	2406848	1086.06	0.451238	46.3532	292.273
HC04	Healthy	HC04_bin41	146	34935	59.7	19473	91.9	1.68	Bacteria	Bacillota_A	Clostridia	Oscillospirales	Oscillospiraceae	CAG-170	CAG-170 sp002404795	750791	2843058	7308.79	2.57075	264.079	1665.11
HC04	Healthy	HC04_bin24	118	64718	43.12	26800.2	90.33	3.5	Bacteria	Bacillota_A	Clostridia	Lachnospirales	Lachnospiraceae	Roseburia	Roseburia intestinalis	157951	3162419	1537.62	0.486216	49.9463	314.929
HC04	Healthy	HC04_bin101	55	207262	53.49	39074.7	90.27	0.67	Bacteria	Bacillota_A	Clostridia	Oscillospirales	Oscillospiraceae	F23-B02	F23-B02 sp001916715	227103	2149110	2210.8	1.02871	105.673	666.306
HC04	Healthy	HC04_bin52	66	11184	43.45	41253.5	89.26	0.67	Bacteria	Bacillota_A	Clostridia	Lachnospirales	Lachnospiraceae	Coprococcus_A	Coprococcus_A catus_A	254982	2722732	2482.2	0.911657	93.6493	590.492
HC04	Healthy	HC04_bin35	265	3910	44.51	10890.5	89.19	4.79	Bacteria	Bacillota_A	Clostridia	Lachnospirales	Lachnospiraceae	Blautia_A	Blautia_A fusiformis	632662	2885988	6158.83	2.13405	219.219	1382.25
HC04	Healthy	HC04_bin54	111	19151	44.56	24390	88.78	2.58	Bacteria	Bacillota_A	Clostridia	Lachnospirales	Lachnospiraceae	Suilimivivens	Suilimivivens sp000438155	129374	2707290	1259.43	0.465199	47.7873	301.316
HC04	Healthy	HC04_bin88	49	106521	59.28	46989.8	87.92	0	Bacteria	Bacillota_A	Clostridia	Oscillospirales	Oscillospiraceae	UBA738	UBA738 sp003522945	182401	2302502	1775.64	0.771177	79.2186	499.501
HC04	Healthy	HC04_bin80	106	22483	58.36	22600.8	87.84	2.01	Bacteria	Bacillota_A	Clostridia	Oscillospirales	Oscillospiraceae	CAG-170	CAG-170 sp000432135	572046	2395688	5568.75	2.32449	238.782	1505.6
HC04	Healthy	HC04_bin116	90	20534	49.97	18276.8	87.81	1.15	Bacteria	Pseudomonadota	Gammaproteobacteria	Burkholderiales	Burkholderiaceae	Parasutterella	Parasutterella excrementihominis	97438	1644914	948.539	0.576649	59.2359	373.503
HC04	Healthy	HC04_bin106	45	197529	57.21	41713.3	87.02	0	Bacteria	Bacillota_A	Clostridia	Oscillospirales	Ruminococcaceae	Angelakisella	Angelakisella sp900547385	216997	1877098	2112.42	1.12537	115.602	728.914
HC04	Healthy	HC04_bin59	264	5050	43.44	10059.2	86.8	1.27	Bacteria	Bacillota_A	Clostridia	Lachnospirales	Lachnospiraceae	Enterocloster	Enterocloster sp900541315	115131	2655639	1120.78	0.422036	43.3534	273.359
HC04	Healthy	HC04_bin85	110	10058	63.33	21628.3	86.16	2.71	Bacteria	Actinomycetota	Coriobacteriia	Coriobacteriales	Eggerthellaceae	Adlercreutzia	Adlercreutzia rubneri	794583	2379118	7735.1	3.25125	333.982	2105.88
HC04	Healthy	HC04_bin18	376	1207	41.41	8713.71	85.13	0.63	Bacteria	Bacillota_A	Clostridia	Lachnospirales	Lachnospiraceae	Blautia_A	Blautia_A obeum	896807	3276355	8730.23	2.66462	273.721	1725.91
HC04	Healthy	HC04_bin5	341	56174	40.89	11687.1	82.28	1.14	Bacteria	Bacillota_A	Clostridia	Lachnospirales	Lachnospiraceae	Blautia_A	Blautia_A wexlerae	1262239	3985307	12287.6	3.08323	316.723	1997.05
HC04	Healthy	HC04_bin50	76	46274	51.91	36044	81.11	1.67	Bacteria	Bacteroidota	Bacteroidia	Bacteroidales	UBA932	Cryptobacteroides	Cryptobacteroides sp000433355	1246060	2739345	12130.1	4.42812	454.875	2868.15
HC04	Healthy	HC04_bin113	45	130189	27.7	39259	81.03	2.68	Bacteria	Bacillota_A	Clostridia	TANB77	CAG-508	Merdicola	Merdicola sp001915925	353720	1766654	3443.39	1.9491	200.22	1262.46
HC04	Healthy	HC04_bin7	530	37341	42.27	7344.38	80.04	2.63	Bacteria	Bacillota_A	Clostridia	Lachnospirales	Lachnospiraceae	Blautia_A	Blautia_A faecis	1696206	3892521	16512.2	4.24204	435.76	2747.62
HC04	Healthy	HC04_bin117	59	53835	60.4	27532.3	79.87	1.34	Bacteria	Bacillota_A	Clostridia	Oscillospirales	Oscillospiraceae	Vescimonas	Vescimonas sp000435555	597583	1624406	5817.35	3.58121	367.878	2319.6
HC04	Healthy	HC04_bin63	51	14284	65.39	51188.7	77.69	2.82	Bacteria	Actinomycetota	Coriobacteriia	Coriobacteriales	Eggerthellaceae	CAJFUR01	CAJFUR01 sp904420575	254961	2610625	2481.99	0.950727	97.6628	615.798
HC04	Healthy	HC04_bin123	85	28228	29.91	16787.2	76.78	1.07	Bacteria	Bacillota_A	Clostridia	TANB77	CAG-508	CAG-245	CAG-245 sp000435175	70057	1426911	681.99	0.477949	49.097	309.574
HC04	Healthy	HC04_bin119	44	71483	26.46	34500.8	76.78	2.68	Bacteria	Bacillota_A	Clostridia	TANB77	CAG-508	CAG-269	CAG-269 sp000431335	301675	1518037	2936.74	1.93457	198.727	1253.04
HC04	Healthy	HC04_bin122	67	36918	26.64	21327.2	76.41	2.68	Bacteria	Bacillota_A	Clostridia	TANB77	CAG-508	CAG-269	Unclassified_CAG-269	76701	1428921	746.668	0.52254	53.6776	338.456
HC04	Healthy	HC04_bin65	348	20859	53.23	7442.66	75.59	0.34	Bacteria	Bacillota_A	Clostridia	Oscillospirales	Acutalibacteraceae	Acutalibacter	Acutalibacter timonensis	88882	2590047	865.248	0.334066	34.3168	216.379
HC04	Healthy	HC04_bin135	20	41537	28.8	58545.5	75.44	0.22	Bacteria	Bacillota_A	Clostridia	TANB77	CAG-508	CAG-273	CAG-273 sp000435755	186541	1170910	1815.94	1.55088	159.313	1004.52
HC04	Healthy	HC04_bin109	185	12869	55.57	9918.68	74.95	1.17	Bacteria	Bacillota_A	Clostridia	Oscillospirales	Butyricicoccaceae	Agathobaculum	Agathobaculum butyriciproducens	179486	1834956	1747.26	0.952208	97.8149	616.757
HC04	Healthy	HC04_bin131	29	68882	29.06	41966.9	73.87	0.62	Bacteria	Bacillota_A	Clostridia	TANB77	CAG-508	UMGS1901	UMGS1901 sp900553755	144537	1217039	1407.04	1.15612	118.761	748.831
HC04	Healthy	HC04_bin129	109	6257	45.56	11739.8	73.12	0	Bacteria	Pseudomonadota	Alphaproteobacteria	RF32	CAG-239	MGBC133411	MGBC133411 sp017935485	42397	1279639	412.726	0.322533	33.132	208.909
HC04	Healthy	HC04_bin121	48	80545	26.34	29892.7	71.38	3.47	Bacteria	Bacillota_A	Clostridia	TANB77	CAG-508	CAG-269	CAG-269 sp003525075	69624	1434849	677.775	0.472367	48.5236	305.958
HC05	Healthy	HC05_bin33	27	89747	43.68	87459	99.98	2.26	Bacteria	Bacillota_C	Negativicutes	Acidaminococcales	Acidaminococcaceae	Phascolarctobacterium	Phascolarctobacterium faecium	879415	2361392	6707.95	2.84068	372.414	3210.95
HC05	Healthy	HC05_bin10	154	7269	61.68	20987.2	99.57	0.59	Bacteria	Desulfobacterota	Desulfovibrionia	Desulfovibrionales	Desulfovibrionaceae	Desulfovibrio	Desulfovibrio fairfieldensis	369220	3232033	2816.31	0.871375	114.238	984.957
HC05	Healthy	HC05_bin55	28	93390	40.64	70484.5	99.33	2.35	Bacteria	Bacillota_A	Clostridia	Oscillospirales	Acutalibacteraceae	Ruminococcus_E	Ruminococcus_E bromii_B	562103	1973567	4287.57	2.1725	284.816	2455.68
HC05	Healthy	HC05_bin41	15	364548	52.31	145433	99.26	0.74	Bacteria	Bacteroidota	Bacteroidia	Flavobacteriales	UBA1820	Merdimorpha	Merdimorpha sp938023515	492510	2181499	3756.74	1.72209	225.767	1946.56
HC05	Healthy	HC05_bin57	41	76257	45.16	47252.1	99.19	1.61	Bacteria	Actinomycetota	Coriobacteriia	Coriobacteriales	Eggerthellaceae	Anaerotardibacter	Anaerotardibacter sp000431675	621452	1937334	4740.27	2.4468	320.777	2765.74
HC05	Healthy	HC05_bin40	71	91681	45.3	31647.6	97.99	0.73	Bacteria	Bacillota_A	Clostridia	Oscillospirales	Acutalibacteraceae	Fimenecus	Fimenecus sp000432435	2156324	2246980	16447.9	7.31999	959.654	8274.14
HC05	Healthy	HC05_bin20	52	18294	55.28	55563.8	97.96	0	Bacteria	Verrucomicrobiota	Verrucomicrobiae	Verrucomicrobiales	Akkermansiaceae	Akkermansia	Akkermansia muciniphila	2379230	2889315	18148.1	6.28112	823.458	7099.85
HC05	Healthy	HC05_bin23	100	191441	41.27	27835.9	97.75	2.88	Bacteria	Bacillota_A	Clostridia	Lachnospirales	Lachnospiraceae	UBA11774	UBA11774 sp003507655	820557	2783588	6258.99	2.24853	294.784	2541.63
HC05	Healthy	HC05_bin47	138	31134	59.65	15627.8	97.58	3.04	Bacteria	Actinomycetota	Coriobacteriia	Coriobacteriales	Coriobacteriaceae	Collinsella	Collinsella aerofaciens_AZ	228118	2156631	1740.02	0.806825	105.775	911.993
HC05	Healthy	HC05_bin52	87	16728	36.75	23547.8	96.64	1.29	Bacteria	Bacillota_A	Clostridia	Oscillospirales	Acutalibacteraceae	Pseudoruminococcus	Pseudoruminococcus massiliensis	358797	2048655	2736.81	1.33591	175.138	1510.04
HC05	Healthy	HC05_bin11	133	6143	59.95	24268	96.39	3.49	Bacteria	Bacillota_A	Clostridia	Christensenellales	Aristaeellaceae	Limiplasma	Limiplasma merdipullorum	645525	3227645	4923.9	1.52554	199.999	1724.39
HC05	Healthy	HC05_bin31	59	116662	37.69	43436.6	96.28	3.02	Bacteria	Bacillota_A	Clostridia	Lachnospirales	Lachnospiraceae	Lachnospira	Lachnospira sp003451515	521226	2562757	3975.78	1.55137	203.385	1753.58
HC05	Healthy	HC05_bin25	196	29808	63.26	13564.3	96.1	3	Bacteria	Actinomycetota	Coriobacteriia	Coriobacteriales	Eggerthellaceae	Adlercreutzia	Adlercreutzia equolifaciens	286221	2658599	2183.22	0.821192	107.659	928.232
HC05	Healthy	HC05_bin29	87	41536	37.91	29585.9	96.03	1.35	Bacteria	Bacillota_A	Clostridia	Lachnospirales	Lachnospiraceae	V9D3004	V9D3004 sp900760345	240600	2573972	1835.23	0.712997	93.4742	805.934
HC05	Healthy	HC05_bin48	71	20802	59.39	30226.8	95.4	0.75	Bacteria	Actinomycetota	Actinomycetes	Actinomycetales	Bifidobacteriaceae	Bifidobacterium	Bifidobacterium adolescentis	226531	2146103	1727.92	0.805143	105.555	910.091
HC05	Healthy	HC05_bin15	144	44586	38.19	21122.4	95.3	2.71	Bacteria	Bacillota_A	Clostridia	UBA1381	UBA1381	Hominilimicola	Hominilimicola fabiformis	749250	3041623	5715.08	1.87896	246.332	2123.88
HC05	Healthy	HC05_bin3	110	59069	48.85	33161.9	94.9	3.13	Bacteria	Bacteroidota	Bacteroidia	Bacteroidales	Bacteroidaceae	Paraprevotella	Paraprevotella clara	403348	3647806	3076.63	0.84342	110.573	953.358
HC05	Healthy	HC05_bin22	85	16188	41.43	33065.1	94.51	1.67	Bacteria	Bacillota_A	Clostridia	Lachnospirales	Lachnospiraceae	Agathobacter	Agathobacter rectalis	672393	2810535	5128.84	1.82486	239.24	2062.73
HC05	Healthy	HC05_bin59	83	42021	49.5	22045.8	93.27	2.56	Bacteria	Bacillota_A	Clostridia	Christensenellales	CAG-138	PeH17	PeH17 sp000435055	146131	1829798	1114.65	0.609165	79.8618	688.568
HC05	Healthy	HC05_bin68	186	19091	60.41	8855.07	92.47	1.21	Bacteria	Actinomycetota	Coriobacteriia	Coriobacteriales	QAMH01	QAMH01	QAMH01 sp900544245	80239	1647043	612.042	0.371601	48.717	420.038
HC05	Healthy	HC05_bin39	149	12786	54.14	15160.9	92.2	2.65	Bacteria	Bacillota_A	Clostridia	Oscillospirales	Acutalibacteraceae	Anaeromassilibacillus	Anaeromassilibacillus stercoravium	168022	2258980	1281.63	0.567348	74.3796	641.301
HC05	Healthy	HC05_bin24	65	86845	55.02	41474.1	91.99	3.21	Bacteria	Bacteroidota	Bacteroidia	Bacteroidales	Rikenellaceae	Alistipes_A	Alistipes_A hominis	271598	2695813	2071.68	0.76848	100.748	868.65
HC05	Healthy	HC05_bin54	124	26812	38.48	16091.2	91.81	1.01	Bacteria	Bacillota_A	Clostridia	Oscillospirales	Acutalibacteraceae	UMGS1071	UMGS1071 sp900542375	120048	1995312	915.695	0.458923	60.165	518.743
HC05	Healthy	HC05_bin9	153	7108	46.27	21514.2	91.05	2.37	Bacteria	Bacillota_A	Clostridia	Monoglobales	Monoglobaceae	Unclassified_Monoglobaceae	Unclassified_Monoglobaceae	229107	3291666	1747.57	0.530907	69.6021	600.109
HC05	Healthy	HC05_bin37	175	13138	58.95	13227	90.37	3.41	Bacteria	Bacteroidota	Bacteroidia	Bacteroidales	Rikenellaceae	Alistipes_A	Alistipes_A ihumii	148347	2314731	1131.55	0.488848	64.0882	552.569
HC05	Healthy	HC05_bin49	125	39955	55.95	16780.3	88.44	0.34	Bacteria	Bacillota_A	Clostridia	Oscillospirales	CAG-382	Woodwardibium	Woodwardibium gallinarum	165808	2097541	1264.74	0.602963	79.0488	681.558
HC05	Healthy	HC05_bin28	139	9059	43.76	18518.9	88.29	2.91	Bacteria	Bacillota_A	Clostridia	Lachnospirales	Lachnospiraceae	Coprococcus_A	Coprococcus_A catus	205032	2574129	1563.93	0.607557	79.651	686.751
HC05	Healthy	HC05_bin8	329	22383	58.45	10544.8	87.61	2.09	Bacteria	Bacillota_A	Clostridia	Christensenellales	Aristaeellaceae	Alectryocaccomicrobium	Alectryocaccomicrobium faecavium	246290	3469252	1878.64	0.54151	70.9922	612.095
HC05	Healthy	HC05_bin42	184	15612	50.72	11849.6	86.58	0	Bacteria	Bacillota_A	Clostridia	Oscillospirales	Ruminococcaceae	Ruminococcus_C	Ruminococcus_C callidus	362168	2180332	2762.52	1.26702	166.107	1432.17
HC05	Healthy	HC05_bin44	307	10872	45.95	7067.61	86.48	4.46	Bacteria	Bacillota_B	Dehalobacteriia	UBA7702	UBA7702	Cryptoclostridium	Unclassified_Cryptoclostridium	94038	2169757	717.297	0.330589	43.3403	373.68
HC05	Healthy	HC05_bin30	57	77414	43.65	44961.3	86.46	2.42	Bacteria	Bacillota_A	Clostridia	Lachnospirales	Lachnospiraceae	Agathobacter	Agathobacter faecis	866233	2562797	6607.4	2.5782	338.003	2914.26
HC05	Healthy	HC05_bin53	215	52247	44.81	9479.94	84.32	2.13	Bacteria	Bacillota_A	Clostridia	Oscillospirales	Ruminococcaceae	Ruminococcus	Unclassified_Ruminococcus	108740	2038187	829.44	0.40695	53.3513	459.995
HC05	Healthy	HC05_bin21	139	73757	47.07	20719.3	82.77	2.51	Bacteria	Bacillota_A	Clostridia	Lachnospirales	Lachnospiraceae	Acetatifactor	Acetatifactor acetigignens	297019	2879985	2265.58	0.786665	103.132	889.205
HC05	Healthy	HC05_bin51	198	37667	45.48	10423	82.49	0	Bacteria	Bacillota_A	Clostridia	Oscillospirales	Ruminococcaceae	Negativibacillus	Negativibacillus massiliensis	109303	2063760	833.735	0.403988	52.963	456.647
HC05	Healthy	HC05_bin62	152	23944	59.08	11287.9	82.05	1.36	Bacteria	Bacillota_A	Clostridia	Oscillospirales	Oscillospiraceae	Hominicoprocola	Hominicoprocola fusiformis	229720	1715757	1752.24	1.02127	133.888	1154.39
HC05	Healthy	HC05_bin63	23	195967	27.67	73588.9	81.03	3.8	Bacteria	Bacillota_A	Clostridia	TANB77	CAG-508	Merdicola	Merdicola sp018371855	649036	1692544	4950.68	2.92499	383.468	3306.26
HC05	Healthy	HC05_bin73	10	260119	27.85	132960	80.86	0.14	Bacteria	Bacillota_A	Clostridia	TANB77	CAG-508	CAG-273	CAG-273 sp003507395	1315191	1329604	10031.9	7.54505	989.16	8528.53
HC05	Healthy	HC05_bin45	335	10086	66.3	6473.16	78.06	0.67	Bacteria	Bacillota_A	Clostridia	Christensenellales	UBA1750	Spyradocola	Spyradocola merdavium	118452	2168507	903.521	0.416656	54.6238	470.966
HC05	Healthy	HC05_bin4	70	138423	46.09	51642.9	77.07	3.45	Bacteria	Bacteroidota	Bacteroidia	Bacteroidales	Bacteroidaceae	Bacteroides	Bacteroides stercoris	1784485	3615005	13611.6	3.7653	493.633	4256.1
HC05	Healthy	HC05_bin69	24	55328	34.8	68270.5	73.68	0	Bacteria	Bacillota_A	Clostridia	Lachnospirales	Lachnospiraceae	Eubacterium_G	Eubacterium_G sp900548465	215618	1638492	1644.68	1.00378	131.595	1134.62
HC05	Healthy	HC05_bin65	259	20908	58.95	6470.78	72.17	0.7	Bacteria	Bacillota_A	Clostridia	Christensenellales	CAG-138	Pelethousia	Pelethousia gallinarum	81318	1675931	620.272	0.370106	48.5211	418.349
HC05	Healthy	HC05_bin66	232	7191	55.7	7217.06	70.78	0	Bacteria	Bacillota_A	Clostridia	Oscillospirales	Butyricicoccaceae	Agathobaculum	Agathobaculum butyriciproducens	99126	1674357	756.107	0.451581	59.2024	510.443
HC06	Healthy	HC06_bin103	58	80638	46.48	42637.7	100	0.6	Bacteria	Bacillota_C	Negativicutes	Acidaminococcales	Acidaminococcaceae	Phascolarctobacterium_A	Phascolarctobacterium_A succinatutens	1802513	2472989	11863.8	4.79737	728.88	3326.04
HC06	Healthy	HC06_bin86	80	151317	48.93	33033.2	100	0.63	Bacteria	Bacillota_A	Clostridia	Lachnospirales	Lachnospiraceae	Otoolea	Otoolea fessa	597241	2642656	3930.94	1.4875	226	1031.29
HC06	Healthy	HC06_bin62	58	28471	63.12	49698.2	99.93	3.76	Bacteria	Actinomycetota	Coriobacteriia	Coriobacteriales	Eggerthellaceae	Adlercreutzia	Adlercreutzia rubneri	534022	2882494	3514.84	1.21938	185.264	845.399
HC06	Healthy	HC06_bin18	92	410492	43.51	38472.2	99.62	1.19	Bacteria	Bacteroidota	Bacteroidia	Bacteroidales	Barnesiellaceae	Barnesiella	Barnesiella intestinihominis	271442	3539445	1786.59	0.504764	76.6906	349.955
HC06	Healthy	HC06_bin106	66	7660	34.42	36186.1	99.33	1.36	Bacteria	Bacillota_A	Clostridia	Lachnospirales	Lachnospiraceae	Eubacterium_G	Eubacterium_G ventriosum	129978	2388280	855.493	0.358205	54.4233	248.345
HC06	Healthy	HC06_bin51	139	62253	36.23	21691.9	99.31	1.4	Bacteria	Bacillota_A	Clostridia	Lachnospirales	Lachnospiraceae	Lachnospira	Lachnospira sp000436475	459845	3015169	3026.62	1.0038	152.511	695.938
HC06	Healthy	HC06_bin85	133	11137	63.3	19916.9	99.29	0.59	Bacteria	Desulfobacterota	Desulfovibrionia	Desulfovibrionales	Desulfovibrionaceae	Desulfovibrio	Desulfovibrio sp900556755	480024	2648944	3159.44	1.19272	181.213	826.915
HC06	Healthy	HC06_bin9	77	106547	48.13	51202.9	99.26	0	Bacteria	Bacteroidota	Bacteroidia	Bacteroidales	Bacteroidaceae	Paraprevotella	Paraprevotella clara	585665	3942620	3854.75	0.977712	148.547	677.852
HC06	Healthy	HC06_bin141	16	442780	52.99	115885	99.19	0	Bacteria	Actinomycetota	Coriobacteriia	Coriobacteriales	Eggerthellaceae	Anaerotardibacter	Anaerotardibacter sp000436075	519939	1854160	3422.15	1.84566	280.418	1279.61
HC06	Healthy	HC06_bin123	195	8261	57.75	10788.5	99.19	0.27	Bacteria	Actinomycetota	Coriobacteriia	Coriobacteriales	Eggerthellaceae	Slackia	Slackia piriformis	61413	2103762	404.21	0.192137	29.192	133.209
HC06	Healthy	HC06_bin75	86	140857	29.37	31848.2	99.06	0	Bacteria	Bacillota_I	Bacilli_A	Erysipelotrichales	Coprobacillaceae	Faecalibacillus	Faecalibacillus intestinalis	1125558	2738948	7408.23	2.70477	410.945	1875.23
HC06	Healthy	HC06_bin8	162	36974	42.63	24507.6	99.03	3.95	Bacteria	Bacillota_A	Clostridia	Lachnospirales	Lachnospiraceae	Roseburia	Roseburia intestinalis	2388898	3970229	15723.3	3.96031	601.703	2745.7
HC06	Healthy	HC06_bin33	173	19762	57.35	19186.5	98.95	1.86	Bacteria	Bacillota_A	Clostridia	Christensenellales	Aristaeellaceae	UBA11524	UBA11524 sp000437595	1388390	3319270	9138.15	2.75306	418.282	1908.71
HC06	Healthy	HC06_bin88	136	67178	46.53	19223.1	98.86	0.03	Bacteria	Bacillota	Bacilli	Lactobacillales	Lactobacillaceae	Lacticaseibacillus	Lacticaseibacillus paracasei	102421	2614339	674.118	0.257854	39.1766	178.771
HC06	Healthy	HC06_bin119	111	23367	34.07	19554	98.66	0	Bacteria	Bacillota_A	Clostridia	Oscillospirales	Acutalibacteraceae	Ruminococcus_E	Ruminococcus_E sp934476515	1529413	2170490	10066.3	4.63782	704.64	3215.42
HC06	Healthy	HC06_bin120	25	290572	57.33	85993.5	98.66	0.17	Bacteria	Bacillota_A	Clostridia	Oscillospirales	Oscillospiraceae	Onthomonas	Onthomonas sp003150485	246980	2149838	1625.58	0.756141	114.883	524.236
HC06	Healthy	HC06_bin126	48	175122	37.85	43156.5	98.66	0.34	Bacteria	Bacillota_A	Clostridia	Oscillospirales	Acutalibacteraceae	Eubacterium_R	Eubacterium_R sp000436835	587860	2071514	3869.19	1.86781	283.783	1294.96
HC06	Healthy	HC06_bin77	90	47858	52.47	30139.8	98.66	0.67	Bacteria	Bacillota_A	Clostridia	Oscillospirales	Acutalibacteraceae	Hominenteromicrobium	Hominenteromicrobium mulieris	1498876	2712586	9865.35	3.63688	552.563	2521.47
HC06	Healthy	HC06_bin76	137	58747	51.68	19863.8	98.66	1.34	Bacteria	Bacillota_A	Clostridia	Oscillospirales	Ruminococcaceae	Ruminococcus_C	Ruminococcus_C sp000437175	1392320	2721336	9164.01	3.36747	511.631	2334.68
HC06	Healthy	HC06_bin53	109	13338	43.54	27476.8	98.66	2.01	Bacteria	Bacillota_A	Clostridia	Lachnospirales	Lachnospiraceae	Coprococcus_A	Coprococcus_A catus_A	535423	2994968	3524.06	1.17666	178.774	815.785
HC06	Healthy	HC06_bin30	138	87068	36.74	24234.8	98.66	2.68	Bacteria	Bacillota_A	Clostridia	Lachnospirales	Lachnospiraceae	Butyribacter	Butyribacter intestini	2722804	3344406	17921	5.35851	814.137	3715.08
HC06	Healthy	HC06_bin55	152	52777	41.95	19514.9	98.66	3.36	Bacteria	Bacillota_A	Clostridia	Lachnospirales	Lachnospiraceae	Butyribacter	Butyribacter sp003529475	562176	2966260	3700.15	1.24741	189.524	864.836
HC06	Healthy	HC06_bin38	182	2912	37.59	17521.2	98.66	4.43	Bacteria	Bacillota_A	Clostridia	Lachnospirales	Lachnospiraceae	Lachnospira	Lachnospira eligens_A	1158846	3188850	7627.33	2.39187	363.406	1658.3
HC06	Healthy	HC06_bin73	168	13019	27.15	16532.8	98.59	2.35	Bacteria	Bacillota_A	Clostridia	Peptostreptococcales	Peptostreptococcaceae	Romboutsia	Romboutsia timonensis	582329	2777509	3832.79	1.37994	209.659	956.718
HC06	Healthy	HC06_bin47	216	23757	44.74	14161	98.1	1.48	Bacteria	Bacillota_A	Clostridia	Lachnospirales	Lachnospiraceae	Hominiventricola	Hominiventricola sp003480725	244706	3058784	1610.61	0.526553	80.0011	365.062
HC06	Healthy	HC06_bin19	254	5980	52.13	13894.6	98.03	2.44	Bacteria	Bacteroidota	Bacteroidia	Bacteroidales	Bacteroidaceae	Prevotella	Prevotella sp003447235	3969767	3529221	26128.3	7.40343	1124.83	5132.83
HC06	Healthy	HC06_bin117	83	142451	44.84	26694.1	97.99	0.34	Bacteria	Bacillota_A	Clostridia	Oscillospirales	Acutalibacteraceae	Fimenecus	Fimenecus sp000432435	727334	2215607	4787.19	2.16067	328.278	1498
HC06	Healthy	HC06_bin81	40	61311	41.33	67232.6	97.99	0.34	Bacteria	Bacillota_A	Clostridia	Lachnospirales	Lachnospiraceae	Coprococcus	Coprococcus ammoniilyticus	1322076	2689303	8701.68	3.23566	491.605	2243.3
HC06	Healthy	HC06_bin42	104	109654	50.27	30335.8	97.99	2.68	Bacteria	Bacillota_A	Clostridia	Oscillospirales	Acutalibacteraceae	Clostridium_A	Clostridium_A leptum	126276	3154923	831.127	0.263438	40.0251	182.643
HC06	Healthy	HC06_bin7	201	1911	45.64	19830.9	97.99	3.4	Bacteria	Bacteroidota	Bacteroidia	Bacteroidales	Bacteroidaceae	Bacteroides	Bacteroides stercoris	719737	3986006	4737.19	1.18845	180.566	823.961
HC06	Healthy	HC06_bin35	405	25495	55.1	8013.67	97.96	2.1	Bacteria	Bacillota_A	Clostridia	Oscillospirales	Ruminococcaceae	Gemmiger	Gemmiger qucibialis	691300	3245538	4550.02	1.40193	213	971.965
HC06	Healthy	HC06_bin110	67	78809	60.12	34122.8	97.58	3.23	Bacteria	Actinomycetota	Coriobacteriia	Coriobacteriales	Coriobacteriaceae	Collinsella	Collinsella sp900542825	166865	2286224	1098.28	0.480389	72.9872	333.056
HC06	Healthy	HC06_bin72	65	113300	55.22	42930	97.52	0	Bacteria	Pseudomonadota	Gammaproteobacteria	Burkholderiales	Burkholderiaceae	Sutterella	Sutterella wadsworthensis	218763	2790450	1439.86	0.515996	78.397	357.742
HC06	Healthy	HC06_bin102	398	5522	48.69	6232.06	97.5	0.73	Bacteria	Pseudomonadota	Gammaproteobacteria	Burkholderiales	Burkholderiaceae	Parasutterella	Parasutterella excrementihominis	61949	2480360	407.738	0.164387	24.9758	113.97
HC06	Healthy	HC06_bin56	95	104599	46.01	31026.5	97.32	1.34	Bacteria	Bacillota_A	Clostridia	Lachnospirales	Lachnospiraceae	Jutongia	Jutongia sp003524945	1307195	2947517	8603.74	2.91898	443.49	2023.74
HC06	Healthy	HC06_bin28	160	87089	36.28	21055	97.32	2.44	Bacteria	Bacillota_A	Clostridia	Lachnospirales	Lachnospiraceae	CAG-411	CAG-411 sp000437275	2537975	3368801	16704.5	4.95859	753.376	3437.82
HC06	Healthy	HC06_bin43	294	2086	56.72	10634.3	97.32	4.19	Bacteria	Bacillota_A	Clostridia	Oscillospirales	Oscillospiraceae	Hominicoprocola	Hominicoprocola sp934835795	205477	3126474	1352.41	0.432569	65.7216	299.902
HC06	Healthy	HC06_bin40	171	47348	41.3	18459	97.29	4	Bacteria	Bacillota_A	Clostridia	Lachnospirales	Lachnospiraceae	Lachnospira	Lachnospira sp000437735	693073	3156492	4561.69	1.44518	219.571	1001.95
HC06	Healthy	HC06_bin58	106	107611	42.39	27746.7	97.26	0	Bacteria	Bacillota_A	Clostridia	Oscillospirales	Ruminococcaceae	Hominimerdicola	Hominimerdicola aceti	523627	2941148	3446.42	1.1718	178.035	812.411
HC06	Healthy	HC06_bin10	136	63402	59.43	28822.2	97.04	0.59	Bacteria	Desulfobacterota	Desulfovibrionia	Desulfovibrionales	Desulfovibrionaceae	Bilophila	Bilophila wadsworthia	244911	3919821	1611.96	0.411234	62.4801	285.11
HC06	Healthy	HC06_bin13	102	71312	42.22	37134.6	96.91	3.21	Bacteria	Bacteroidota	Bacteroidia	Bacteroidales	Bacteroidaceae	Phocaeicola	Phocaeicola massiliensis	316698	3787731	2084.45	0.550317	83.6115	381.537
HC06	Healthy	HC06_bin16	200	103666	47.6	17808.1	96.55	3.5	Bacteria	Bacillota_A	Clostridia	Lachnospirales	Lachnospiraceae	Gallintestinimicrobium	Gallintestinimicrobium propionicum	892926	3561621	5877.09	1.65012	250.708	1144.03
HC06	Healthy	HC06_bin67	360	19168	46.71	7910.9	96.45	0.93	Bacteria	Bacillota	Bacilli	Lactobacillales	Lactobacillaceae	Lacticaseibacillus	Lacticaseibacillus rhamnosus	75429	2847923	496.461	0.174324	26.4856	120.86
HC06	Healthy	HC06_bin134	130	47682	62.97	15098.9	96.37	0.81	Bacteria	Actinomycetota	Coriobacteriia	Coriobacteriales	Atopobiaceae	Parolsenella	Parolsenella sp900544655	64664	1962857	425.607	0.216831	32.9438	150.33
HC06	Healthy	HC06_bin71	90	203816	45.38	31040.2	96.36	1.9	Bacteria	Bacillota_A	Clostridia	Lachnospirales	Lachnospiraceae	Hominiventricola	Hominiventricola filiformis	186561	2793621	1227.91	0.439542	66.7811	304.736
HC06	Healthy	HC06_bin147	63	87103	46.3	27637.7	96.2	1.27	Bacteria	Bacillota_C	Negativicutes	Veillonellales	Dialisteraceae	Allisonella	Allisonella histaminiformans	131993	1741173	868.755	0.498948	75.8069	345.923
HC06	Healthy	HC06_bin17	169	14465	41.1	21023.9	96.2	2.01	Bacteria	Bacillota_A	Clostridia	Lachnospirales	Lachnospiraceae	Anthropogastromicrobium	Anthropogastromicrobium aceti	898051	3553037	5910.82	1.6636	252.756	1153.38
HC06	Healthy	HC06_bin129	156	2369	42.16	13028.8	96.18	2.75	Bacteria	Bacillota	Bacilli	Lactobacillales	Streptococcaceae	Streptococcus	Streptococcus parasanguinis_F	81367	2032486	535.544	0.263492	40.0332	182.68
HC06	Healthy	HC06_bin3	117	31649	41.86	44698.8	96.12	0.97	Bacteria	Bacteroidota	Bacteroidia	Bacteroidales	Bacteroidaceae	Phocaeicola	Phocaeicola dorei	2409363	5229754	15858	3.03227	460.703	2102.29
HC06	Healthy	HC06_bin34	56	142693	66.34	59216.7	95.97	4.33	Bacteria	Actinomycetota	Coriobacteriia	Coriobacteriales	Eggerthellaceae	Gordonibacter	Gordonibacter pamelaeae	217041	3316137	1428.53	0.43078	65.4499	298.662
HC06	Healthy	HC06_bin54	84	20210	57.01	35361	95.75	2.03	Bacteria	Bacillota_A	Clostridia	Oscillospirales	Oscillospiraceae	Faecousia	Faecousia sp000435995	203453	2970327	1339.09	0.450823	68.4952	312.558
HC06	Healthy	HC06_bin66	73	88464	47.31	39322	95.74	1.42	Bacteria	Bacillota_A	Clostridia	Peptostreptococcales	Anaerovoracaceae	Hominibacterium	Hominibacterium hominis	135611	2870505	892.569	0.310945	47.2429	215.579
HC06	Healthy	HC06_bin92	120	24115	42.8	21343.3	95.73	1.25	Bacteria	Bacillota_A	Clostridia	Lachnospirales	Lachnospiraceae	Bariatricus	Bariatricus comes	620190	2561195	4081.99	1.59378	242.149	1104.98
HC06	Healthy	HC06_bin48	174	2857	38.27	17518	95.46	4.75	Bacteria	Bacillota_A	Clostridia	Lachnospirales	Lachnospiraceae	Agathobacter	Agathobacter sp905209075	1108008	3048141	7292.72	2.39251	363.503	1658.74
HC06	Healthy	HC06_bin61	122	3266	42.01	23663.1	95.3	0	Bacteria	Bacillota_A	Clostridia	Lachnospirales	Lachnospiraceae	Eubacterium_F	Eubacterium_F sp900539115	182384	2886896	1200.42	0.415817	63.1765	288.288
HC06	Healthy	HC06_bin78	85	322291	40.5	31906.5	95.3	2.01	Bacteria	Bacillota_A	Clostridia	Lachnospirales	Lachnospiraceae	Eubacterium_F	Eubacterium_F sp003491505	281655	2712048	1853.81	0.683544	103.853	473.905
HC06	Healthy	HC06_bin94	71	57030	40.93	36060	94.93	0.27	Bacteria	Bacillota_A	Clostridia	Lachnospirales	Lachnospiraceae	Roseburia_C	Roseburia_C amylophila	175696	2560262	1156.4	0.451673	68.6242	313.147
HC06	Healthy	HC06_bin96	152	32463	42.89	16764	94.83	3.02	Bacteria	Bacillota_A	Clostridia	Lachnospirales	Lachnospiraceae	Mediterraneibacter	Mediterraneibacter lactaris	274153	2548124	1804.43	0.70814	107.59	490.957
HC06	Healthy	HC06_bin4	358	44620	45.02	13944.6	94.42	2.24	Bacteria	Bacteroidota	Bacteroidia	Bacteroidales	Tannerellaceae	Parabacteroides	Parabacteroides distasonis	481917	4992185	3171.9	0.635372	96.5343	440.507
HC06	Healthy	HC06_bin83	267	13265	55.47	9962.33	94.3	2.08	Bacteria	Bacillota_A	Clostridia	Oscillospirales	Butyricicoccaceae	Pseudobutyricicoccus	Pseudobutyricicoccus sp003477405	95629	2659941	629.414	0.236627	35.9515	164.055
HC06	Healthy	HC06_bin31	199	51467	58.69	16789.2	93.96	1.68	Bacteria	Bacillota_A	Clostridia	Oscillospirales	Oscillospiraceae	CAG-170	CAG-170 sp002404795	476224	3341054	3134.43	0.938155	142.537	650.427
HC06	Healthy	HC06_bin97	86	112550	40.8	29568.7	93.57	1.78	Bacteria	Bacillota_A	Clostridia	Lachnospirales	Lachnospiraceae	Dorea	Dorea formicigenerans	287519	2542904	1892.4	0.744189	113.067	515.95
HC06	Healthy	HC06_bin36	113	84732	48.93	28598.6	93	0.24	Bacteria	Bacillota_A	Clostridia	Lachnospirales	Lachnospiraceae	Roseburia	Roseburia hominis	420492	3231640	2767.61	0.856409	130.117	593.753
HC06	Healthy	HC06_bin26	307	105460	37.52	11024.3	92.62	3.02	Bacteria	Bacillota_A	Clostridia	UBA1381	UBA1381	Hominilimicola	Hominilimicola fabiformis	1243219	3384447	8182.66	2.41772	367.333	1676.22
HC06	Healthy	HC06_bin124	76	103460	62.41	27531.5	92.55	0.62	Bacteria	Pseudomonadota	Gammaproteobacteria	Burkholderiales	Burkholderiaceae	Sutterella	Sutterella wadsworthensis_A	83748	2092396	551.215	0.263437	40.0249	182.642
HC06	Healthy	HC06_bin25	175	38187	57.34	19397.2	92.18	1.97	Bacteria	Bacillota_A	Clostridia	Oscillospirales	Ruminococcaceae	Gemmiger	Gemmiger formicilis	1223314	3394519	8051.64	2.37195	360.379	1644.49
HC06	Healthy	HC06_bin174	15	310502	27.61	85635.3	92.13	1.28	Bacteria	Bacillota_I	Bacilli_A	RF39	UBA660	CAG-417	CAG-417 sp000432835	65662	1284530	432.176	0.336447	51.1175	233.26
HC06	Healthy	HC06_bin99	496	1340	52.26	5092.47	91.55	4.01	Bacteria	Bacillota_A	Clostridia	Lachnospirales	Lachnospiraceae	Laedolimicola	Laedolimicola ammoniilytica	73903	2525865	486.417	0.192574	29.2585	133.513
HC06	Healthy	HC06_bin59	101	54994	58.82	28659.7	91.35	1.44	Bacteria	Bacteroidota	Bacteroidia	Bacteroidales	Rikenellaceae	Alistipes	Alistipes communis	127548	2894626	839.499	0.29002	44.0637	201.072
HC06	Healthy	HC06_bin60	107	84418	38.7	27049.9	91.14	1.83	Bacteria	Bacillota_A	Clostridia	Lachnospirales	Lachnospiraceae	Blautia	Blautia stercoris	477360	2894336	3141.9	1.08553	164.929	752.606
HC06	Healthy	HC06_bin107	80	52820	60	29092.5	90.94	4.72	Bacteria	Bacillota_A	Clostridia	Oscillospirales	Oscillospiraceae	CAG-103	CAG-103 sp900757655	1027767	2327396	6764.59	2.9065	441.595	2015.09
HC06	Healthy	HC06_bin178	48	42524	26.76	23930.5	90.82	1.12	Bacteria	Bacillota_I	Bacilli_A	RF39	UBA660	Onthocola_B	Onthocola_B sp000438075	44983	1148665	296.07	0.257752	39.1611	178.701
HC06	Healthy	HC06_bin93	99	38960	56.82	25866.8	90.74	2.83	Bacteria	Bacillota_A	Clostridia	Christensenellales	Aristaeellaceae	Ventricola	Ventricola sp900542445	173994	2560814	1145.2	0.447201	67.9448	310.047
HC06	Healthy	HC06_bin155	42	135308	29.4	38248.8	90.64	0	Bacteria	Bacillota_I	Bacilli_A	RFN20	CAG-288	CAG-345	CAG-345 sp000433315	83845	1606451	551.854	0.343523	52.1927	238.166
HC06	Healthy	HC06_bin89	87	381706	58.79	29912.2	90.6	1.34	Bacteria	Bacillota_A	Clostridia	Oscillospirales	Oscillospiraceae	UBA738	UBA738 sp003522945	216430	2602365	1424.51	0.547389	83.1667	379.507
HC06	Healthy	HC06_bin74	167	25769	58.68	16569.8	89.98	0.22	Bacteria	Bacillota_A	Clostridia	Christensenellales	Aristaeellaceae	Ventricola	Ventricola sp900542395	205454	2767154	1352.26	0.488684	74.2474	338.807
HC06	Healthy	HC06_bin115	69	93433	59.1	32764.4	89.93	3.63	Bacteria	Bacillota_A	Clostridia	Oscillospirales	Oscillospiraceae	Evtepia	Evtepia gabavorous	412363	2260742	2714.1	1.20054	182.402	832.338
HC06	Healthy	HC06_bin70	137	36096	43.31	20489	89.85	1.96	Bacteria	Bacillota_A	Clostridia	Lachnospirales	Lachnospiraceae	Blautia_A	Blautia_A ammoniilytica	194291	2806999	1278.79	0.455572	69.2166	315.85
HC06	Healthy	HC06_bin90	142	6179	43.5	18134.6	89.72	4.64	Bacteria	Bacillota_A	Clostridia	Lachnospirales	Lachnospiraceae	Eubacterium_I	Eubacterium_I ramulus	118908	2575111	782.632	0.303922	46.1759	210.71
HC06	Healthy	HC06_bin139	29	314421	32.94	65642.4	88.89	0.85	Bacteria	Cyanobacteriota	Vampirovibrionia	Gastranaerophilales	Gastranaerophilaceae	Stercorousia	Stercorousia sp001765415	284921	1903630	1875.3	0.985119	149.672	682.987
HC06	Healthy	HC06_bin46	154	52849	51.64	19932.5	88.37	0.67	Bacteria	Bacillota_A	Clostridia	Oscillospirales	Ruminococcaceae	CAG-115	CAG-115 sp003531585	850833	3069598	5600.04	1.82436	277.181	1264.83
HC06	Healthy	HC06_bin32	388	9269	46.1	8606.69	88.29	3.08	Bacteria	Bacillota_A	Clostridia	Lachnospirales	Lachnospiraceae	Acetatifactor	Acetatifactor acetigignens	379815	3339394	2499.88	0.748602	113.738	519.009
HC06	Healthy	HC06_bin114	50	247482	34.98	45345.3	88.03	0.28	Bacteria	Cyanobacteriota	Vampirovibrionia	Gastranaerophilales	Gastranaerophilaceae	CAG-196	CAG-196 sp002102975	147765	2267263	972.564	0.42896	65.1733	297.4
HC06	Healthy	HC06_bin87	117	37781	43.57	22503.2	88.03	3.96	Bacteria	Bacillota_A	Clostridia	Lachnospirales	Lachnospiraceae	Blautia_A	Blautia_A sp900548245	187492	2632872	1234.04	0.468705	71.212	324.955
HC06	Healthy	HC06_bin113	65	22179	41.55	34904.1	87.76	0.22	Bacteria	Bacillota_A	Clostridia	Lachnospirales	Lachnospiraceae	Dorea_D	Dorea_D hominis	174984	2268765	1151.71	0.50764	77.1274	351.949
HC06	Healthy	HC06_bin156	369	4896	41.39	4249.36	87.36	0.73	Bacteria	Bacillota_A	Clostridia	Oscillospirales	Ruminococcaceae	RGIG3102	RGIG3102 sp934526065	35478	1568013	233.51	0.148921	22.6261	103.248
HC06	Healthy	HC06_bin108	56	45031	41.02	41328.4	85.67	2.14	Bacteria	Bacillota_A	Clostridia	Lachnospirales	Lachnospiraceae	UBA11774	UBA11774 sp003507655	1498592	2314390	9863.48	4.2618	647.511	2954.73
HC06	Healthy	HC06_bin143	523	2068	57.88	3480.45	85.62	3.19	Bacteria	Bacillota_A	Clostridia	Oscillospirales	Acutalibacteraceae	Acutalibacter	Acutalibacter sp900548545	37978	1820274	249.965	0.137323	20.8639	95.2064
HC06	Healthy	HC06_bin152	538	6730	53.92	3116.68	85.04	2.56	Bacteria	Bacillota_A	Clostridia	Christensenellales	CAG-138	SFEL01	SFEL01 sp004557245	45319	1676772	298.282	0.177891	27.0275	123.332
HC06	Healthy	HC06_bin160	140	4820	47.68	10781.3	84.77	1.68	Bacteria	Bacillota_A	Clostridia	Christensenellales	CAG-917	CAG-349	CAG-349 sp003539515	65122	1509377	428.622	0.283973	43.145	196.88
HC06	Healthy	HC06_bin112	180	9062	37.88	12641.8	82.73	3.48	Bacteria	Bacillota_A	Clostridia	Lachnospirales	Lachnospiraceae	Anaerobutyricum	Anaerobutyricum soehngenii	136876	2275515	900.895	0.395908	60.1517	274.485
HC06	Healthy	HC06_bin140	36	204621	62.55	52396	80.65	2.3	Bacteria	Actinomycetota	Actinomycetes	Actinomycetales	Bifidobacteriaceae	Bifidobacterium	Bifidobacterium bifidum	714838	1886256	4704.94	2.49433	378.972	1729.33
HC06	Healthy	HC06_bin105	52	9330	46.79	46238.1	80.56	2.95	Bacteria	Bacillota_A	Clostridia	Lachnospirales	Lachnospiraceae	Roseburia_D	Roseburia_D yibonii	199866	2404380	1315.48	0.54712	83.1258	379.321
HC06	Healthy	HC06_bin148	433	5414	29.08	4015.79	78.95	2.63	Bacteria	Bacillota_I	Bacilli_A	RFN20	CAG-826	RUG131	RUG131 sp900549975	40409	1738836	265.965	0.152956	23.2391	106.045
HC06	Healthy	HC06_bin159	39	49018	29.76	39248.7	78.79	1.34	Bacteria	Bacillota_A	Clostridia	TANB77	CAG-508	CAG-245	CAG-245 sp000435175	111437	1530700	733.459	0.479166	72.8013	332.208
HC06	Healthy	HC06_bin150	69	167260	28.37	24649	77.56	2.46	Bacteria	Bacillota_A	Clostridia	TANB77	CAG-508	CAG-269	CAG-269 sp003525075	265622	1700782	1748.28	1.02793	156.176	712.666
HC06	Healthy	HC06_bin128	445	10045	32.65	4572.2	76.53	0.67	Bacteria	Bacillota_A	Clostridia	Lachnospirales	Lachnospiraceae	Eubacterium_G	Eubacterium_G sp000434315	56527	2034631	372.051	0.182859	27.7824	126.777
HC06	Healthy	HC06_bin170	81	21489	26.77	17111.1	74.43	2.13	Bacteria	Bacillota_A	Clostridia	TANB77	CAG-508	CAG-269	CAG-269 sp001916005	56689	1385998	373.117	0.269205	40.9012	186.641
HC06	Healthy	HC06_bin127	242	13890	57.59	8511.71	74.19	3.91	Bacteria	Bacillota_A	Clostridia	Oscillospirales	Ruminococcaceae	Faecalibacterium	Faecalibacterium duncaniae	714901	2059833	4705.36	2.28434	347.067	1583.74
HC06	Healthy	HC06_bin145	88	6947	59.75	20220.7	73.64	2.22	Bacteria	Actinomycetota	Actinomycetes	Actinomycetales	Bifidobacteriaceae	Bifidobacterium	Bifidobacterium longum	145776	1779424	959.473	0.539204	81.9231	373.833
HC06	Healthy	HC06_bin130	117	25230	41.33	17242.7	73.51	0.58	Bacteria	Bacillota_A	Clostridia	Lachnospirales	Lachnospiraceae	Mediterraneibacter	Mediterraneibacter faecis	80555	2017392	530.199	0.262814	39.9303	182.21
HC07	Healthy	HC07_bin35	62	166842	46.98	36821.9	99.4	0.6	Bacteria	Bacillota_C	Negativicutes	Acidaminococcales	Acidaminococcaceae	Phascolarctobacterium_A	Phascolarctobacterium_A succinatutens_B	1664100	2282960	12885.9	5.64436	728.922	4913.39
HC07	Healthy	HC07_bin47	320	15055	38.85	5865.7	98.83	4.75	Bacteria	Bacillota	Bacilli	Lactobacillales	Streptococcaceae	Streptococcus	Streptococcus thermophilus	183197	1877025	1418.57	0.755757	97.5997	657.882
HC07	Healthy	HC07_bin18	109	50566	44.48	25637.3	98.66	0.34	Bacteria	Bacillota_A	Clostridia	HGM11514	HGM11514	HGM11514	HGM11514 sp900757255	537023	2794461	4158.4	1.48809	192.174	1295.37
HC07	Healthy	HC07_bin34	50	79984	49.65	46849	98.58	0.71	Bacteria	Bacillota_A	Clostridia	Peptostreptococcales	Anaerovoracaceae	Alangreenwoodia	Alangreenwoodia sp905206455	241940	2342448	1873.45	0.799782	103.285	696.206
HC07	Healthy	HC07_bin40	43	126620	39.08	48187.6	97.99	0.67	Bacteria	Bacillota_A	Clostridia	Lachnospirales	Anaerotignaceae	Metalachnospira	Metalachnospira sp900548595	287594	2072066	2226.97	1.07476	138.796	935.57
HC07	Healthy	HC07_bin23	110	142587	50.96	23727.3	97.99	4.5	Bacteria	Bacillota_A	Clostridia	Oscillospirales	Ruminococcaceae	Negativibacillus	Negativibacillus sp000435195	2059154	2610001	15944.9	6.10917	788.948	5318
HC07	Healthy	HC07_bin38	73	32679	45.43	29752.9	97.87	0.8	Bacteria	Bacillota_A	Clostridia	Peptostreptococcales	Anaerovoracaceae	Fimisoma	Fimisoma sp000435715	177374	2171959	1373.48	0.632371	81.6654	550.476
HC07	Healthy	HC07_bin28	66	148910	61.05	37456.2	97.58	3.43	Bacteria	Actinomycetota	Coriobacteriia	Coriobacteriales	Eggerthellaceae	CALADF01	CALADF01 sp937890835	339166	2472112	2626.31	1.06238	137.197	924.792
HC07	Healthy	HC07_bin21	90	57926	42.84	29935.1	97.26	3.77	Bacteria	Bacillota_A	Clostridia	Oscillospirales	Ruminococcaceae	Hominimerdicola	Hominimerdicola aceti	288201	2694156	2231.67	0.828336	106.973	721.062
HC07	Healthy	HC07_bin16	72	82578	51.49	39359.6	96.64	4.4	Bacteria	Bacillota_A	Clostridia	Oscillospirales	Acutalibacteraceae	Fimivicinus	Fimivicinus sp900544375	374829	2833891	2902.46	1.0242	132.267	891.559
HC07	Healthy	HC07_bin13	83	4363	45.03	34729.2	96.57	3.48	Bacteria	Bacillota_A	Clostridia	Lachnospirales	Lachnospiraceae	UMGS1370	UMGS1370 sp900542035	397149	2882527	3075.3	1.06688	137.778	928.71
HC07	Healthy	HC07_bin42	87	102585	40.79	23506.9	96.42	0.17	Bacteria	Bacillota_A	Clostridia	Oscillospirales	Acutalibacteraceae	CAG-964	CAG-964 sp000435335	376744	2045104	2917.29	1.42648	184.218	1241.74
HC07	Healthy	HC07_bin8	160	47649	40.93	20314.9	95.81	4.83	Bacteria	Bacillota_A	Clostridia	Lachnospirales	Lachnospiraceae	Mediterraneibacter	Mediterraneibacter faecis	2836660	3250391	21965.5	6.7578	872.713	5882.63
HC07	Healthy	HC07_bin15	87	80013	41.73	32739.8	95.22	1.15	Bacteria	Bacillota_A	Clostridia	Lachnospirales	Lachnospiraceae	Lachnospira	Lachnospira sp000437735	414919	2848366	3212.9	1.12798	145.669	981.9
HC07	Healthy	HC07_bin24	49	28968	44.47	52459.1	93.29	0.71	Bacteria	Bacillota_A	Clostridia	Lachnospirales	Lachnospiraceae	Wujia	Wujia chipingensis	453636	2570494	3512.7	1.36655	176.478	1189.57
HC07	Healthy	HC07_bin39	38	133961	57.07	56296.8	92.92	1.34	Bacteria	Bacillota_A	Clostridia	Oscillospirales	Ruminococcaceae	Avimicrobium	Avimicrobium caecorum	418446	2139278	3240.21	1.51463	195.602	1318.48
HC07	Healthy	HC07_bin20	129	26839	48.79	21027.7	92.83	1.92	Bacteria	Bacillota_A	Clostridia	Lachnospirales	Lachnospiraceae	Gallintestinimicrobium	Gallintestinimicrobium propionicum	571801	2712572	4427.7	1.63229	210.797	1420.9
HC07	Healthy	HC07_bin12	184	22325	46.04	16419.4	91.94	4.15	Bacteria	Bacillota_A	Clostridia	Lachnospirales	Lachnospiraceae	Jutongia	Jutongia sp003524945	266515	3021167	2063.74	0.683094	88.2159	594.63
HC07	Healthy	HC07_bin44	25	55929	47.73	76500.3	90.6	0.67	Bacteria	Bacillota_A	Clostridia	Lachnospirales	Anaerotignaceae	Anaerotignum	Anaerotignum faecicola	747905	1912508	5791.35	3.02815	391.06	2635.99
HC07	Healthy	HC07_bin45	276	17222	38.29	6888.32	86.75	0.67	Bacteria	Bacillota_A	Clostridia	Oscillospirales	Acutalibacteraceae	UMGS1071	UMGS1071 sp900542375	83450	1901176	646.19	0.339889	43.8939	295.872
HC07	Healthy	HC07_bin31	72	41853	49.81	33768.6	82.54	2.53	Bacteria	Bacillota_A	Clostridia	Lachnospirales	Lachnospiraceae	Otoolea	Otoolea sp000435655	405379	2431342	3139.03	1.29107	166.731	1123.87
HC07	Healthy	HC07_bin56	95	29511	61	16802.8	81.75	4.47	Bacteria	Bacillota_A	Clostridia	Oscillospirales	Oscillospiraceae	Vescimonas	Vescimonas coprocola	313011	1596270	2423.78	1.5184	196.089	1321.76
HC07	Healthy	HC07_bin59	35	9187	26.87	41276	76.56	0.22	Bacteria	Bacillota_A	Clostridia	TANB77	CAG-508	CAG-273	CAG-273 sp000438355	302307	1444661	2340.89	1.62038	209.258	1410.53
HC07	Healthy	HC07_bin54	113	8458	53.8	14407.2	74.16	1.01	Bacteria	Bacillota_A	Clostridia	Oscillospirales	Acutalibacteraceae	Hominenteromicrobium	Hominenteromicrobium mulieris	141238	1628009	1093.67	0.671782	86.755	584.783
HC07	Healthy	HC07_bin29	108	28411	46.9	22622.1	72.59	1.81	Bacteria	Bacillota_A	Clostridia	Lachnospirales	Lachnospiraceae	Fusicatenibacter	Fusicatenibacter saccharivorans	549142	2443187	4252.25	1.74045	224.765	1515.05
HC07	Healthy	HC07_bin37	279	13669	55.94	7899.99	72.32	2.38	Bacteria	Bacillota_A	Clostridia	Oscillospirales	Ruminococcaceae	Gemmiger	Gemmiger qucibialis	262102	2204097	2029.57	0.920817	118.916	801.566
HC08	Healthy	HC08_bin32	40	361838	43.69	59326.2	99.98	1.5	Bacteria	Bacillota_C	Negativicutes	Acidaminococcales	Acidaminococcaceae	Phascolarctobacterium	Phascolarctobacterium faecium	1170092	2373049	9280.59	3.91083	493.075	3724.92
HC08	Healthy	HC08_bin36	57	35169	40.71	39938.9	99.33	1.4	Bacteria	Bacillota_A	Clostridia	Oscillospirales	Acutalibacteraceae	Ruminococcus_E	Ruminococcus_E bromii_B	201655	2276517	1599.43	0.702576	88.5805	669.178
HC08	Healthy	HC08_bin46	125	75661	38.83	14324.8	99.13	0.36	Bacteria	Bacillota	Bacilli	Lactobacillales	Streptococcaceae	Streptococcus	Streptococcus thermophilus	208490	1790602	1653.64	0.92351	116.436	879.61
HC08	Healthy	HC08_bin30	60	82914	60.07	39791.2	99.08	0.61	Bacteria	Actinomycetota	Actinomycetes	Actinomycetales	Bifidobacteriaceae	Bifidobacterium	Bifidobacterium longum	670587	2387472	5318.76	2.22778	280.877	2121.88
HC08	Healthy	HC08_bin2	95	116496	45.59	46479.8	98.85	4.79	Bacteria	Bacteroidota	Bacteroidia	Bacteroidales	Tannerellaceae	Parabacteroides	Parabacteroides merdae	2021550	4415576	16033.9	3.63122	457.822	3458.61
HC08	Healthy	HC08_bin37	94	85862	33.8	23891.5	98.66	0	Bacteria	Bacillota_A	Clostridia	Oscillospirales	Acutalibacteraceae	Ruminococcus_E	Ruminococcus_E sp934476515	891539	2245801	7071.24	3.14865	396.98	2998.98
HC08	Healthy	HC08_bin42	76	29317	60.01	27317.8	98.39	0.88	Bacteria	Actinomycetota	Coriobacteriia	Coriobacteriales	Coriobacteriaceae	Collinsella	Collinsella sp031296755	279901	2076151	2220.04	1.0693	134.817	1018.47
HC08	Healthy	HC08_bin14	243	72271	49.87	13216.7	97.99	4.32	Bacteria	Bacillota_A	Clostridia	Oscillospirales	Acutalibacteraceae	Clostridium_A	Clostridium_A leptum	219754	3211664	1742.98	0.542703	68.4237	516.905
HC08	Healthy	HC08_bin26	100	93489	44.75	26229.7	97.65	0	Bacteria	Bacillota_A	Clostridia	Oscillospirales	Ruminococcaceae	Ruminiclostridium_E	Ruminiclostridium_E siraeum	579838	2622967	4598.99	1.75335	221.062	1670
HC08	Healthy	HC08_bin41	24	29512	52.8	86911.3	97.32	0.67	Bacteria	Bacillota_A	Clostridia	Oscillospirales	Acutalibacteraceae	CAG-217	CAG-217 sp000436335	1251261	2085871	9924.38	4.75791	599.875	4531.73
HC08	Healthy	HC08_bin39	40	169026	33.61	53550.8	96.64	1.34	Bacteria	Bacillota_A	Clostridia	Lachnospirales	CAG-274	CAG-274	CAG-274 sp900545305	327050	2142034	2594	1.211	152.682	1153.43
HC08	Healthy	HC08_bin25	98	10290	57.13	27046.7	96.51	2.59	Bacteria	Bacillota_A	Clostridia	Oscillospirales	Oscillospiraceae	Hominicoprocola	Hominicoprocola fusiformis	1124728	2650572	8920.78	3.36561	424.334	3205.62
HC08	Healthy	HC08_bin23	67	43218	35.84	40002.6	95.95	2.68	Bacteria	Bacillota_A	Clostridia	Lachnospirales	Lachnospiraceae	Lachnospira	Lachnospira pectinoschiza_A	719186	2680174	5704.23	2.1283	268.336	2027.13
HC08	Healthy	HC08_bin34	63	53137	52.64	37463.9	95.91	0.34	Bacteria	Bacillota_A	Clostridia	Oscillospirales	Acutalibacteraceae	Hominenteromicrobium	Hominenteromicrobium mulieris	315956	2360226	2506.01	1.06177	133.867	1011.29
HC08	Healthy	HC08_bin21	118	36633	63.29	22977.8	94.6	1.21	Bacteria	Actinomycetota	Coriobacteriia	Coriobacteriales	Eggerthellaceae	Adlercreutzia	Adlercreutzia rubneri	222785	2711386	1767.02	0.651704	82.1665	620.724
HC08	Healthy	HC08_bin48	119	11555	45.47	13592.5	93.91	1.36	Bacteria	Bacillota_C	Negativicutes	Veillonellales	Dialisteraceae	Dialister	Dialister invisus	78679	1617508	624.043	0.385805	48.6421	367.465
HC08	Healthy	HC08_bin20	209	25561	40.43	13138.1	93.73	4.44	Bacteria	Bacillota_A	Clostridia	Lachnospirales	Lachnospiraceae	Eubacterium_F	Eubacterium_F sp003491505	214700	2745859	1702.89	0.620168	78.1905	590.687
HC08	Healthy	HC08_bin12	254	54683	38.25	13101.8	93.26	1.34	Bacteria	Bacillota_A	Clostridia	Lachnospirales	Lachnospiraceae	Anaerobutyricum	Anaerobutyricum hallii	600178	3327852	4760.31	1.43045	180.35	1362.45
HC08	Healthy	HC08_bin31	171	81474	37.93	13880.7	89.86	2.04	Bacteria	Bacillota_A	Clostridia	UBA1381	UBA1381	Hominilimicola	Hominilimicola fabiformis	145473	2373605	1153.82	0.486104	61.2878	462.997
HC08	Healthy	HC08_bin28	279	7099	44.24	8946.6	85.29	4.03	Bacteria	Bacillota_A	Clostridia	Lachnospirales	Lachnospiraceae	Coprococcus_A	Coprococcus_A catus_A	130810	2496102	1037.52	0.415656	52.4057	395.897
HC08	Healthy	HC08_bin33	268	8401	41.85	8847.99	85.07	3.46	Bacteria	Bacillota_A	Clostridia	Lachnospirales	Lachnospiraceae	Mediterraneibacter	Mediterraneibacter torques	139631	2371261	1107.48	0.467044	58.8847	444.843
HC08	Healthy	HC08_bin18	59	169327	46.7	51265.6	81.33	1.95	Bacteria	Bacteroidota	Bacteroidia	Bacteroidales	Bacteroidaceae	Bacteroides	Bacteroides stercoris	2296915	3024673	18218	6.02313	759.393	5736.81
HC08	Healthy	HC08_bin6	140	36691	50.45	26613.1	79.28	1.1	Bacteria	Pseudomonadota	Gammaproteobacteria	Enterobacterales	Enterobacteriaceae	Escherichia	Escherichia coli	261288	3725830	2072.41	0.556227	70.1288	529.786
HC08	Healthy	HC08_bin29	177	22657	44.51	14000.2	78.58	2.24	Bacteria	Bacillota_A	Clostridia	Lachnospirales	Lachnospiraceae	Hominisplanchenecus	Hominisplanchenecus faecis	261927	2478036	2077.47	0.838355	105.699	798.503
HC08	Healthy	HC08_bin24	384	6374	57.63	6968.59	75.26	1.79	Bacteria	Bacillota_A	Clostridia	Oscillospirales	Ruminococcaceae	Gemmiger	Gemmiger sp900539695	540059	2675937	4283.48	1.60074	201.821	1524.65
HC09	Healthy	HC09_bin29	249	29330	34.15	9789	100	3.67	Bacteria	Bacillota_I	Bacilli_A	Erysipelotrichales	Coprobacillaceae	Catenibacterium	Catenibacterium mitsuokai	198097	2437460	2718.99	1.1155	81.2719	1111.74
HC09	Healthy	HC09_bin33	59	118041	45.03	40582.4	99.33	1.34	Bacteria	Bacillota_A	Clostridia	Oscillospirales	Ruminococcaceae	Ruminococcus_C	Ruminococcus_C sp000437255	300180	2394360	4120.13	1.72077	125.37	1714.97
HC09	Healthy	HC09_bin7	270	3111	57.06	11768.5	99.3	2.56	Bacteria	Bacillota_A	Clostridia	Christensenellales	Aristaeellaceae	UBA11524	UBA11524 sp000437595	361792	3177491	4965.79	1.5628	113.861	1557.53
HC09	Healthy	HC09_bin4	119	63595	44.95	30600.6	98.99	3.77	Bacteria	Bacteroidota	Bacteroidia	Bacteroidales	Bacteroidaceae	Prevotella	Prevotella copri_B	2287026	3641474	31390.7	8.62032	628.05	8591.26
HC09	Healthy	HC09_bin21	144	23830	45.03	19093.3	98.32	0.06	Bacteria	Bacillota_A	Clostridia	Oscillospirales	Ruminococcaceae	Ruminiclostridium_E	Ruminiclostridium_E siraeum	609024	2749430	8359.19	3.04033	221.509	3030.08
HC09	Healthy	HC09_bin9	63	53772	57.76	49736.1	97.96	1.36	Bacteria	Verrucomicrobiota	Verrucomicrobiae	Verrucomicrobiales	Akkermansiaceae	Akkermansia	Akkermansia massiliensis	328996	3133371	4515.65	1.44115	104.997	1436.29
HC09	Healthy	HC09_bin40	106	9549	38.18	19662.9	97.61	4.87	Bacteria	Bacillota_A	Clostridia	Oscillospirales	Acutalibacteraceae	Eubacterium_R	Eubacterium_R sp000436835	177558	2084267	2437.08	1.16927	85.1897	1165.33
HC09	Healthy	HC09_bin26	113	33316	63.51	22555.3	97.51	0.59	Bacteria	Desulfobacterota	Desulfovibrionia	Desulfovibrionales	Desulfovibrionaceae	Desulfovibrio	Desulfovibrio sp900556755	203704	2548744	2795.95	1.09699	79.9233	1093.29
HC09	Healthy	HC09_bin15	118	186217	44.03	25690.5	96.31	4.07	Bacteria	Bacillota_A	Clostridia	Lachnospirales	Lachnospiraceae	Wujia	Wujia chipingensis	719889	3031473	9880.87	3.25943	237.472	3248.44
HC09	Healthy	HC09_bin44	63	84179	42.56	28655.9	96.26	1.9	Bacteria	Bacillota_C	Negativicutes	Acidaminococcales	Acidaminococcaceae	URXU01	URXU01 sp900541915	111225	1805319	1526.62	0.845626	61.6096	842.775
HC09	Healthy	HC09_bin41	142	16048	48.56	14309.5	96.2	0.02	Bacteria	Bacillota_C	Negativicutes	Veillonellales	Dialisteraceae	Dialister	Dialister hominis	252164	2031947	3461.09	1.70334	124.1	1697.59
HC09	Healthy	HC09_bin6	90	30955	45.52	36476.6	95.97	4.76	Bacteria	Bacillota_A	Clostridia	Lachnospirales	Lachnospiraceae	Jutongia	Jutongia sp003524945	950923	3282896	13051.9	3.97574	289.66	3962.34
HC09	Healthy	HC09_bin23	178	23410	49.87	15195.7	95.7	1.18	Bacteria	Bacteroidota	Bacteroidia	Bacteroidales	Bacteroidaceae	Prevotella	Prevotella sp900553595	230444	2704836	3162.97	1.16938	85.197	1165.43
HC09	Healthy	HC09_bin8	317	37380	56.95	9926.05	95.24	4.93	Bacteria	Bacillota_A	Clostridia	Oscillospirales	Ruminococcaceae	Gemmiger	Gemmiger sp900539695	471761	3146558	6475.18	2.05786	149.929	2050.92
HC09	Healthy	HC09_bin2	206	5022	42.03	21473.8	95.13	3.01	Bacteria	Bacteroidota	Bacteroidia	Bacteroidales	Bacteroidaceae	Phocaeicola	Phocaeicola vulgatus	639482	4423612	8777.24	1.98418	144.561	1977.49
HC09	Healthy	HC09_bin31	91	119724	51.48	26638.3	94.72	0.94	Bacteria	Bacteroidota	Bacteroidia	Bacteroidales	Muribaculaceae	CAG-873	CAG-873 sp001701165	1493061	2424087	20493.1	8.45394	615.927	8425.44
HC09	Healthy	HC09_bin22	85	55474	40.64	32198.6	94.63	1.34	Bacteria	Bacillota_A	Clostridia	Lachnospirales	Lachnospiraceae	Eubacterium_F	Eubacterium_F sp003491505	749525	2736883	10287.6	3.75889	273.861	3746.22
HC09	Healthy	HC09_bin36	160	15110	44.29	14160.1	94.33	0.22	Bacteria	Bacillota_A	Clostridia	Oscillospirales	Acutalibacteraceae	CAG-488	CAG-488 sp000434055	118569	2265620	1627.42	0.718313	52.334	715.891
HC09	Healthy	HC09_bin12	93	84990	47.51	33516.7	94.05	1.48	Bacteria	Bacteroidota	Bacteroidia	Bacteroidales	UBA932	Cryptobacteroides	Cryptobacteroides sp000435075	2105416	3117052	28898	9.27094	675.451	9239.68
HC09	Healthy	HC09_bin39	47	192638	40.9	45489.9	93.96	2.08	Bacteria	Bacillota_A	Clostridia	Oscillospirales	Acutalibacteraceae	Ruminococcus_E	Ruminococcus_E bromii_B	365922	2138024	5022.48	2.34912	171.15	2341.2
HC09	Healthy	HC09_bin5	87	25825	46.77	38698.5	92.48	4.07	Bacteria	Bacteroidota	Bacteroidia	Bacteroidales	Bacteroidaceae	Phocaeicola	Phocaeicola barnesiae	656580	3366768	9011.92	2.67673	195.018	2667.7
HC09	Healthy	HC09_bin19	148	22673	37.5	18955.8	87.34	3.61	Bacteria	Bacillota_A	Clostridia	Lachnospirales	Lachnospiraceae	Lachnospira	Lachnospira eligens_A	407657	2805451	5595.32	1.99444	145.309	1987.72
HC09	Healthy	HC09_bin34	321	3751	56.41	7426.86	83.89	3.4	Bacteria	Bacillota_A	Clostridia	Oscillospirales	Ruminococcaceae	Gemmiger	Gemmiger qucibialis	206332	2384021	2832.02	1.18792	86.5479	1183.91
HC09	Healthy	HC09_bin42	274	16524	34.17	6991.27	83.65	1.79	Bacteria	Bacillota_I	Bacilli_A	Erysipelotrichales	Erysipelotrichaceae	Holdemanella	Holdemanella sp900556915	90034	1915609	1235.77	0.645103	47.0002	642.929
HC09	Healthy	HC09_bin13	96	82860	48.82	32412	82.2	1.67	Bacteria	Bacteroidota	Bacteroidia	Bacteroidales	Bacteroidaceae	Bacteroides	Bacteroides pullorum	261949	3111552	3595.39	1.1555	84.186	1151.6
HC09	Healthy	HC09_bin45	25	9611	26.25	66124.6	77.84	3.94	Bacteria	Bacillota_A	Clostridia	TANB77	CAG-508	CAG-492	CAG-492 sp000434015	281404	1653115	3862.42	2.33645	170.227	2328.57
HC09	Healthy	HC09_bin35	374	6320	48.74	6177.19	74.49	5	Bacteria	Bacillota_A	Clostridia	Lachnospirales	Lachnospiraceae	Fusicatenibacter	Fusicatenibacter saccharivorans	109548	2310270	1503.61	0.650836	47.4178	648.642
HC09	Healthy	HC09_bin49	80	8289	28.1	16454	74.43	3.04	Bacteria	Bacillota_A	Clostridia	TANB77	CAG-508	CAG-273	CAG-273 sp003534295	82700	1316319	1135.1	0.862331	62.8267	859.424
HC09	Healthy	HC09_bin30	341	4614	57.55	7116.26	72.4	3.21	Bacteria	Bacillota_A	Clostridia	Christensenellales	Aristaeellaceae	SFMI01	SFMI01 sp004556155	116551	2426645	1599.73	0.659234	48.0297	657.011
HC10	Healthy	HC10_bin36	58	52368	54.01	29996.3	100	0.35	Bacteria	Actinomycetota	Coriobacteriia	Coriobacteriales	Eggerthellaceae	Anaerotardibacter	Anaerotardibacter sp000435675	104015	1739787	1408.46	0.809557	59.7861	571.985
HC10	Healthy	HC10_bin20	42	29602	43.62	56381.6	99.98	1.5	Bacteria	Bacillota_C	Negativicutes	Acidaminococcales	Acidaminococcaceae	Phascolarctobacterium	Phascolarctobacterium faecium	196468	2368027	2660.35	1.12345	82.967	793.762
HC10	Healthy	HC10_bin8	116	25226	40.71	24969.7	99.33	2.35	Bacteria	Bacillota_A	Clostridia	Lachnospirales	Lachnospiraceae	Eubacterium_F	Eubacterium_F sp003491505	424902	2896484	5753.56	1.98639	146.696	1403.47
HC10	Healthy	HC10_bin6	191	10969	57.73	16342.1	99.3	1.17	Bacteria	Bacillota_A	Clostridia	Christensenellales	Aristaeellaceae	UBA11524	UBA11524 sp000437595	499568	3121341	6764.6	2.16721	160.049	1531.22
HC10	Healthy	HC10_bin10	46	7665	42.02	60517.3	99.14	0.12	Bacteria	Bacillota_A	Clostridia	Lachnospirales	Lachnospiraceae	Bacteroides_F	Bacteroides_F pectinophilus	750788	2783796	10166.3	3.65197	269.699	2580.27
HC10	Healthy	HC10_bin32	56	57840	36.47	34620.2	98.66	0	Bacteria	Bacillota_A	Clostridia	Oscillospirales	Acutalibacteraceae	Eubacterium_R	Eubacterium_R sp000434995	174754	1938732	2366.33	1.22055	90.1383	862.371
HC10	Healthy	HC10_bin24	46	51965	40.83	48432	98.66	0.67	Bacteria	Bacillota_A	Clostridia	Oscillospirales	Acutalibacteraceae	Ruminococcus_E	Ruminococcus_E bromii_B	582800	2227874	7891.64	3.54223	261.595	2502.73
HC10	Healthy	HC10_bin12	75	99311	44.42	36339.2	98.32	2.68	Bacteria	Bacillota_A	Clostridia	Oscillospirales	Ruminococcaceae	Ruminiclostridium_E	Ruminiclostridium_E sp900539195	1534484	2725444	20778.3	7.62382	563.022	5386.54
HC10	Healthy	HC10_bin2	109	82906	45.9	34958.2	98.15	1.69	Bacteria	Bacteroidota	Bacteroidia	Bacteroidales	Bacteroidaceae	Prevotella	Prevotella rara	1709769	3810440	23151.8	6.07589	448.706	4292.86
HC10	Healthy	HC10_bin18	145	35606	45.32	17190.7	97.99	0.34	Bacteria	Bacillota_A	Clostridia	Oscillospirales	Ruminococcaceae	Ruminococcus_C	Ruminococcus_C sp000433635	201948	2492645	2734.56	1.09705	81.0176	775.111
HC10	Healthy	HC10_bin13	84	20894	47.07	31611.3	97.99	0.67	Bacteria	Bacillota_A	Clostridia	Oscillospirales	Ruminococcaceae	Huintestinicola	Huintestinicola butyrica	1354345	2655346	18339.1	6.90646	510.045	4879.7
HC10	Healthy	HC10_bin5	109	71445	36.87	30673.5	97.99	4.76	Bacteria	Bacillota_A	Clostridia	Lachnospirales	Lachnospiraceae	Butyribacter	Butyribacter intestini	513420	3343413	6952.17	2.07936	153.562	1469.16
HC10	Healthy	HC10_bin15	58	75572	42.79	45328.7	97.76	1.34	Bacteria	Bacillota_A	Clostridia	Lachnospirales	Lachnospiraceae	Eubacterium_F	Eubacterium_F sp000433735	475053	2629063	6432.65	2.44674	180.693	1728.73
HC10	Healthy	HC10_bin22	70	194177	51.94	33395.6	96.94	0.67	Bacteria	Bacillota_A	Clostridia	Oscillospirales	Acutalibacteraceae	CAG-177	CAG-177 sp003538135	286023	2337689	3873.01	1.65677	122.353	1170.57
HC10	Healthy	HC10_bin14	48	50048	43.83	55034.3	94.93	2.9	Bacteria	Bacillota_A	Clostridia	Lachnospirales	Lachnospiraceae	CAG-194	CAG-194 sp000432915	1789963	2641649	24237.7	9.17522	677.593	6482.67
HC10	Healthy	HC10_bin3	150	56111	44.08	25059.7	94.08	3.83	Bacteria	Bacillota_A	Clostridia	Lachnospirales	Lachnospiraceae	Suilimivivens	Suilimivivens sp000438155	738239	3758947	9996.42	2.65937	196.395	1878.95
HC10	Healthy	HC10_bin33	98	67486	34.64	19466.3	93.13	0.71	Bacteria	Bacillota_I	Bacilli_A	Erysipelotrichales	Erysipelotrichaceae	Holdemanella	Holdemanella sp900556915	251074	1907698	3399.77	1.78213	131.611	1259.15
HC10	Healthy	HC10_bin11	212	9577	43.75	12883.2	90.15	2.78	Bacteria	Bacillota_A	Clostridia	Lachnospirales	Lachnospiraceae	Coprococcus	Coprococcus aceti	500387	2731237	6775.69	2.48081	183.209	1752.8
HC10	Healthy	HC10_bin30	160	13781	57.65	12316.1	89.71	1.21	Bacteria	Actinomycetota	Coriobacteriia	Coriobacteriales	Eggerthellaceae	Slackia	Slackia isoflavoniconvertens	107850	1970577	1460.39	0.741096	54.7302	523.614
HC10	Healthy	HC10_bin27	224	24114	40.09	9129.26	88.59	0	Bacteria	Bacillota_A	Clostridia	Oscillospirales	Ruminococcaceae	UBA5884	UBA5884 sp900551505	387298	2044954	5244.36	2.56454	189.392	1811.95
HC10	Healthy	HC10_bin34	30	33550	32.9	61995.3	88.03	0.85	Bacteria	Cyanobacteriota	Vampirovibrionia	Gastranaerophilales	Gastranaerophilaceae	Stercorousia	Stercorousia sp001765415	282663	1859859	3827.51	2.05796	151.981	1454.03
HC10	Healthy	HC10_bin16	105	40879	38.04	24804.4	87.84	1.01	Bacteria	Bacillota_A	Clostridia	UBA1381	UBA1381	Hominilimicola	Hominilimicola fabiformis	179939	2604463	2436.54	0.935523	69.0887	660.986
HC10	Healthy	HC10_bin29	34	122974	45.33	60119	82.03	1.69	Bacteria	Bacillota_A	Clostridia	Lachnospirales	Lachnospiraceae	Pararoseburia	Pararoseburia lenta	195865	2044046	2652.19	1.29752	95.8222	916.75
HC10	Healthy	HC10_bin23	39	16366	33.77	57227.8	79.19	0	Bacteria	Bacillota_A	Clostridia	Lachnospirales	Lachnospiraceae	Bovifimicola	Bovifimicola ammoniilytica	321773	2231886	4357.1	1.9522	144.171	1379.31
HC10	Healthy	HC10_bin19	274	2532	58.36	9092.91	75.28	1.79	Bacteria	Bacillota_A	Clostridia	Oscillospirales	Ruminococcaceae	Faecalibacterium	Faecalibacterium longum	758786	2491457	10274.6	4.12395	304.555	2913.74
HC10	Healthy	HC10_bin21	207	17261	57.8	11363.3	75.11	4.46	Bacteria	Bacillota_A	Clostridia	Oscillospirales	Ruminococcaceae	Faecalibacterium	Faecalibacterium duncaniae	573434	2352206	7764.81	3.30108	243.786	2332.35
HC10	Healthy	HC10_bin26	114	5304	42.85	18667.3	74.85	2.63	Bacteria	Bacillota_A	Clostridia	Lachnospirales	Lachnospiraceae	Coprococcus	Coprococcus eutactus	553390	2128074	7493.4	3.52121	260.043	2487.88
HC11	Healthy	HC11_bin37	30	308824	43.93	79548.5	100	1.65	Bacteria	Bacillota_C	Negativicutes	Acidaminococcales	Acidaminococcaceae	Phascolarctobacterium	Phascolarctobacterium faecium	927270	2386454	5876.62	2.46249	388.556	2853
HC11	Healthy	HC11_bin40	46	39567	40.73	48582.5	99.33	1.01	Bacteria	Bacillota_A	Clostridia	Oscillospirales	Acutalibacteraceae	Ruminococcus_E	Ruminococcus_E bromii_B	688247	2234794	4361.8	1.95177	307.969	2261.28
HC11	Healthy	HC11_bin24	73	130773	42.65	39771.4	98.63	0.68	Bacteria	Bacillota_A	Clostridia	Oscillospirales	Ruminococcaceae	Hominimerdicola	Hominimerdicola aceti	563726	2903312	3572.64	1.23054	194.167	1425.68
HC11	Healthy	HC11_bin18	75	3069	43.77	40614.1	97.99	1.36	Bacteria	Bacillota_A	Clostridia	Lachnospirales	Lachnospiraceae	Coprococcus	Coprococcus aceti	438233	3046059	2777.32	0.911776	143.869	1056.37
HC11	Healthy	HC11_bin15	101	125716	52.45	31403.5	97.68	1.07	Bacteria	Bacteroidota	Bacteroidia	Bacteroidales	Bacteroidaceae	Prevotella	Prevotella sp003447235	2698547	3171755	17102.2	5.39202	850.806	6247.1
HC11	Healthy	HC11_bin21	301	10601	49.98	9985.37	97.32	4.05	Bacteria	Bacillota_A	Clostridia	Oscillospirales	Ruminococcaceae	Ruminococcus_C	Ruminococcus_C callidus	510670	3005596	3236.4	1.07679	169.906	1247.55
HC11	Healthy	HC11_bin17	60	107948	57.91	51571.5	97.28	0.68	Bacteria	Verrucomicrobiota	Verrucomicrobiae	Verrucomicrobiales	Akkermansiaceae	Akkermansia	Akkermansia massiliensis	397044	3094290	2516.29	0.813203	128.315	942.163
HC11	Healthy	HC11_bin33	88	85035	43.63	28522.9	96.97	4.07	Bacteria	Bacillota_A	Clostridia	Lachnospirales	Lachnospiraceae	Eubacterium_F	Eubacterium_F sp000433735	462080	2510013	2928.45	1.16671	184.095	1351.73
HC11	Healthy	HC11_bin28	70	111571	44.17	38887.9	96.82	2.65	Bacteria	Bacillota_A	Clostridia	Lachnospirales	Lachnospiraceae	Wujia	Wujia chipingensis	349660	2722152	2215.99	0.814057	128.45	943.153
HC11	Healthy	HC11_bin47	49	26519	38.03	40186.3	96.64	0.71	Bacteria	Bacillota_A	Clostridia	Oscillospirales	Acutalibacteraceae	Eubacterium_R	Eubacterium_R sp000436835	276968	1969131	1755.3	0.891407	140.655	1032.77
HC11	Healthy	HC11_bin22	152	21176	42.19	19744.7	96.64	3.04	Bacteria	Bacillota_A	Clostridia	Lachnospirales	Lachnospiraceae	Butyribacter	Butyribacter sp003529475	725449	3001201	4597.57	1.53191	241.72	1774.84
HC11	Healthy	HC11_bin32	82	91563	63.7	30741.6	96.46	1.78	Bacteria	Desulfobacterota	Desulfovibrionia	Desulfovibrionales	Desulfovibrionaceae	Desulfovibrio	Desulfovibrio sp900556755	275417	2520814	1745.47	0.692422	109.257	802.229
HC11	Healthy	HC11_bin52	39	39958	44.55	47254.9	95.97	0.34	Bacteria	Bacillota_A	Clostridia	Oscillospirales	Acutalibacteraceae	Fimenecus	Fimenecus sp000432435	224255	1842943	1421.23	0.771172	121.683	893.467
HC11	Healthy	HC11_bin25	154	29632	41.62	18802.3	95.97	3.7	Bacteria	Bacillota_A	Clostridia	Lachnospirales	Lachnospiraceae	Agathobacter	Agathobacter rectalis	1127138	2895560	7143.29	2.46698	389.264	2858.2
HC11	Healthy	HC11_bin36	138	8847	38.29	17522.2	95.5	1.9	Bacteria	Bacillota_A	Clostridia	UBA1381	UBA1381	Hominilimicola	Hominilimicola fabiformis	201871	2418059	1279.37	0.529088	83.4847	612.993
HC11	Healthy	HC11_bin6	103	34201	45.82	39956.8	95.5	4.55	Bacteria	Bacteroidota	Bacteroidia	Bacteroidales	Bacteroidaceae	Bacteroides	Bacteroides stercoris	2440416	4115546	15466.3	3.75801	592.975	4353.96
HC11	Healthy	HC11_bin5	62	89787	44.89	70000.2	94.9	1.15	Bacteria	Bacteroidota	Bacteroidia	Bacteroidales	Tannerellaceae	Parabacteroides	Parabacteroides distasonis	724435	4340012	4591.14	1.05786	166.92	1225.62
HC11	Healthy	HC11_bin23	222	14753	47.58	13514.7	94.24	4.44	Bacteria	Bacillota_A	Clostridia	Lachnospirales	Lachnospiraceae	Fusicatenibacter	Fusicatenibacter saccharivorans	525004	3000261	3327.24	1.10898	174.986	1284.85
HC11	Healthy	HC11_bin30	94	75328	59.11	27774.6	93.96	3.48	Bacteria	Bacillota_A	Clostridia	Oscillospirales	Oscillospiraceae	Vescimonas	Vescimonas sp900545585	2178398	2610816	13805.7	5.28789	834.374	6126.46
HC11	Healthy	HC11_bin42	110	42887	53.21	20170.6	91.92	1.17	Bacteria	Bacillota_A	Clostridia	Oscillospirales	Acutalibacteraceae	Hominenteromicrobium	Hominenteromicrobium mulieris	211402	2218767	1339.77	0.603835	95.279	699.594
HC11	Healthy	HC11_bin41	67	31257	60.82	33305.8	91.61	3.32	Bacteria	Bacillota_A	Clostridia	Oscillospirales	Oscillospiraceae	CAG-103	CAG-103 sp900317855	524247	2231486	3322.44	1.48889	234.932	1725
HC11	Healthy	HC11_bin39	251	38453	56.4	9206.28	91.18	2.04	Bacteria	Bacillota_A	Clostridia	Oscillospirales	Ruminococcaceae	Gemmiger	Gemmiger qucibialis	372847	2310777	2362.94	1.02257	161.351	1184.73
HC11	Healthy	HC11_bin19	26	319388	43.59	116855	90.94	3.21	Bacteria	Bacteroidota	Bacteroidia	Bacteroidales	Barnesiellaceae	Barnesiella	Barnesiella intestinihominis	696618	3038232	4414.85	1.4531	229.284	1683.54
HC11	Healthy	HC11_bin34	98	55780	57.38	25295.9	90.86	0.34	Bacteria	Bacillota_A	Clostridia	Oscillospirales	Oscillospiraceae	Hominicoprocola	Hominicoprocola fusiformis	696997	2479002	4417.25	1.78187	281.16	2064.44
HC11	Healthy	HC11_bin14	107	51051	41.18	29870.2	90.19	3.48	Bacteria	Bacillota_A	Clostridia	Lachnospirales	Lachnospiraceae	Anthropogastromicrobium	Anthropogastromicrobium aceti	566696	3196106	3591.46	1.1237	177.308	1301.9
HC11	Healthy	HC11_bin29	192	16577	56.86	14173.4	88.81	2.91	Bacteria	Bacillota_A	Clostridia	Christensenellales	Aristaeellaceae	Ventricola	Ventricola sp900542445	206326	2721297	1307.6	0.480506	75.819	556.707
HC11	Healthy	HC11_bin48	116	12927	57.41	16587.3	88.55	4.16	Bacteria	Bacillota_A	Clostridia	Oscillospirales	Oscillospiraceae	Vescimonas	Vescimonas sp003539495	318320	1924129	2017.37	1.04846	165.436	1214.73
HC11	Healthy	HC11_bin31	116	44036	41.4	22012	88.21	2.44	Bacteria	Bacillota_A	Clostridia	Lachnospirales	Lachnospiraceae	Dorea_A	Dorea_A longicatena	645327	2553387	4089.79	1.60171	252.734	1855.72
HC11	Healthy	HC11_bin38	273	11960	29.29	8697.68	87.81	0	Bacteria	Bacillota_I	Bacilli_A	Erysipelotrichales	Coprobacillaceae	Faecalibacillus	Faecalibacillus intestinalis	244334	2374466	1548.48	0.652138	102.901	755.555
HC11	Healthy	HC11_bin9	55	183171	45.35	63627.8	86.54	0.38	Bacteria	Bacteroidota	Bacteroidia	Bacteroidales	Tannerellaceae	Parabacteroides	Parabacteroides merdae	1233922	3499528	7820.04	2.2346	352.597	2588.97
HC11	Healthy	HC11_bin35	77	135445	42.8	31796	82.86	4.99	Bacteria	Bacillota_A	Clostridia	Lachnospirales	Lachnospiraceae	Bariatricus	Bariatricus comes	410678	2448296	2602.69	1.06306	167.74	1231.65
HC11	Healthy	HC11_bin50	42	76355	37.82	45145	81.66	0	Bacteria	Bacillota_A	Clostridia	Monoglobales	Monoglobaceae	Monoglobus	Monoglobus pectinilyticus	191595	1896091	1214.24	0.640392	101.047	741.948
HC11	Healthy	HC11_bin44	230	16514	55.18	9081.27	80.45	2.01	Bacteria	Bacillota_A	Clostridia	Oscillospirales	Butyricicoccaceae	Agathobaculum	Agathobaculum butyriciproducens	152940	2088692	969.265	0.464053	73.2229	537.644
HC11	Healthy	HC11_bin27	111	7770	41.72	25656.5	79.43	1.93	Bacteria	Bacillota_A	Clostridia	Lachnospirales	Lachnospiraceae	Roseburia	Roseburia inulinivorans	357854	2847874	2267.92	0.796354	125.657	922.643
HC11	Healthy	HC11_bin7	194	18021	42.96	19090.4	75.5	1.75	Bacteria	Bacillota_A	Clostridia	Lachnospirales	Lachnospiraceae	Roseburia	Roseburia intestinalis	481703	3703542	3052.82	0.824296	130.065	955.016
HC11	Healthy	HC11_bin51	129	33465	45.47	14564.6	75.49	0.22	Bacteria	Bacillota_A	Clostridia	Oscillospirales	Ruminococcaceae	Ruminiclostridium_E	Ruminiclostridium_E siraeum	124380	1878836	788.264	0.419549	66.2006	486.083
HC12	Healthy	HC12_bin14	89	104583	53.61	28989.7	99.04	1.54	Bacteria	Bacteroidota	Bacteroidia	Bacteroidales	Rikenellaceae	Alistipes	Alistipes putredinis	409319	2580079	3210.63	1.24439	158.646	1523.93
HC12	Healthy	HC12_bin13	132	57470	43.33	19739.5	98.2	2.89	Bacteria	Bacillota_C	Negativicutes	Acidaminococcales	Acidaminococcaceae	Phascolarctobacterium	Phascolarctobacterium faecium	871229	2605609	6833.77	2.62271	334.367	3211.88
HC12	Healthy	HC12_bin19	80	12093	59.91	28095.7	98.12	1.44	Bacteria	Actinomycetota	Actinomycetes	Actinomycetales	Bifidobacteriaceae	Bifidobacterium	Bifidobacterium longum	207743	2247654	1629.5	0.724978	92.4266	887.837
HC12	Healthy	HC12_bin11	167	9350	38.08	17785.6	97.32	1.01	Bacteria	Bacillota_A	Clostridia	UBA1381	UBA1381	Hominilimicola	Hominilimicola fabiformis	389355	2970192	3054.03	1.02823	131.087	1259.21
HC12	Healthy	HC12_bin18	130	5336	57.47	17516.8	93.2	2.15	Bacteria	Bacillota_A	Clostridia	Oscillospirales	Butyricicoccaceae	Agathobaculum	Agathobaculum hominis	415556	2277186	3259.55	1.43139	182.487	1752.94
HC12	Healthy	HC12_bin12	192	53685	41.83	13872.1	91.85	4.18	Bacteria	Bacillota_A	Clostridia	Lachnospirales	Lachnospiraceae	Dorea_A	Dorea_A amylophila	516280	2663441	4049.61	1.52044	193.839	1861.99
HC12	Healthy	HC12_bin31	183	7135	26.36	7795.26	88.2	2.81	Bacteria	Bacillota_I	Bacilli_A	RF39	UBA660	RUG11198	RUG11198 sp934149245	82344	1426532	645.892	0.452771	57.7232	554.481
HC12	Healthy	HC12_bin16	270	19849	41.14	8914.7	86	3.31	Bacteria	Bacillota_A	Clostridia	Lachnospirales	Lachnospiraceae	Dorea	Dorea formicigenerans	393314	2406968	3085.09	1.28173	163.406	1569.66
HC13	Healthy	HC13_bin26	88	120268	57.69	37258.8	100	0.64	Bacteria	Bacteroidota	Bacteroidia	Bacteroidales	Rikenellaceae	Alistipes	Alistipes finegoldii	672341	3278770	6321.05	1.92787	205.059	1899.61
HC13	Healthy	HC13_bin93	31	170674	54.82	55411.2	100	1.73	Bacteria	Actinomycetota	Coriobacteriia	Coriobacteriales	Eggerthellaceae	Anaerotardibacter	Anaerotardibacter sp000435675	114020	1717748	1071.97	0.624053	66.3776	614.906
HC13	Healthy	HC13_bin83	227	25667	38.47	8945.81	100	2.34	Bacteria	Bacillota	Bacilli	Lactobacillales	Streptococcaceae	Streptococcus	Streptococcus thermophilus	424669	2030699	3992.55	1.9661	209.125	1937.28
HC13	Healthy	HC13_bin19	185	106895	57.56	18974.8	99.9	0.74	Bacteria	Bacteroidota	Bacteroidia	Bacteroidales	Rikenellaceae	Alistipes	Alistipes shahii	384907	3510341	3618.73	1.03088	109.649	1015.77
HC13	Healthy	HC13_bin25	36	154694	43.5	91656.9	99.62	2.73	Bacteria	Bacteroidota	Bacteroidia	Bacteroidales	Barnesiellaceae	Barnesiella	Barnesiella intestinihominis	1071829	3299647	10076.9	3.05392	324.831	3009.16
HC13	Healthy	HC13_bin59	87	48256	53.94	30809.4	99.52	0.96	Bacteria	Bacteroidota	Bacteroidia	Bacteroidales	Rikenellaceae	Alistipes	Alistipes putredinis	1480693	2680416	13920.8	5.19353	552.412	5117.4
HC13	Healthy	HC13_bin11	144	41012	43.28	29367.8	99.46	0	Bacteria	Bacteroidota	Bacteroidia	Bacteroidales	Marinifilaceae	Odoribacter	Odoribacter splanchnicus	276119	4228966	2595.95	0.61385	65.2923	604.852
HC13	Healthy	HC13_bin73	67	52660	46.92	33971.1	99.4	0.6	Bacteria	Bacillota_C	Negativicutes	Acidaminococcales	Acidaminococcaceae	Phascolarctobacterium_A	Phascolarctobacterium_A succinatutens_B	499907	2276061	4699.91	2.06493	219.637	2034.66
HC13	Healthy	HC13_bin68	79	50718	34.68	32223.5	99.33	0.67	Bacteria	Bacillota_A	Clostridia	Lachnospirales	Lachnospiraceae	Eubacterium_G	Eubacterium_G ventriosum	545598	2545654	5129.47	2.01499	214.325	1985.46
HC13	Healthy	HC13_bin40	107	134962	52.31	28118.7	99.33	1.01	Bacteria	Bacillota_A	Clostridia	Oscillospirales	Acutalibacteraceae	Hominenteromicrobium	Hominenteromicrobium mulieris	257643	3008700	2422.25	0.805081	85.6327	793.28
HC13	Healthy	HC13_bin76	46	105076	41.11	48692.9	99.33	1.01	Bacteria	Bacillota_A	Clostridia	Oscillospirales	Acutalibacteraceae	Ruminococcus_E	Ruminococcus_E bromii_B	266119	2239872	2501.93	1.117	118.81	1100.63
HC13	Healthy	HC13_bin34	355	8940	55.23	8776.41	99.32	2.04	Bacteria	Bacillota_A	Clostridia	Oscillospirales	Ruminococcaceae	Gemmiger	Gemmiger qucibialis	1098205	3115625	10324.8	3.31389	352.483	3265.31
HC13	Healthy	HC13_bin61	154	7836	44.82	17361.4	98.99	0.17	Bacteria	Bacillota_A	Clostridia	Oscillospirales	Ruminococcaceae	Ruminiclostridium_E	Ruminiclostridium_E siraeum	148925	2673659	1400.13	0.523675	55.7008	515.998
HC13	Healthy	HC13_bin55	157	26254	48.35	17434.4	98.75	0.73	Bacteria	Pseudomonadota	Gammaproteobacteria	Burkholderiales	Burkholderiaceae	Parasutterella	Parasutterella excrementihominis	193475	2737197	1818.97	0.664536	70.6836	654.795
HC13	Healthy	HC13_bin6	110	2241	43.39	47807.8	98.68	3.08	Bacteria	Bacteroidota	Bacteroidia	Bacteroidales	Bacteroidaceae	Bacteroides	Bacteroides fragilis	1364179	5258856	12825.4	2.43882	259.406	2403.07
HC13	Healthy	HC13_bin49	83	31991	40.71	33811.7	98.66	0.67	Bacteria	Bacillota_A	Clostridia	Lachnospirales	Lachnospiraceae	Eubacterium_F	Eubacterium_F sp003491505	459578	2806367	4320.75	1.53962	163.763	1517.06
HC13	Healthy	HC13_bin44	45	81306	44	63616.6	98.66	4.18	Bacteria	Bacillota_A	Clostridia	Lachnospirales	Lachnospiraceae	Wujia	Wujia chipingensis	1775871	2862749	16696	5.83214	620.338	5746.65
HC13	Healthy	HC13_bin60	192	5754	54.4	13958.6	98.66	4.76	Bacteria	Bacillota_A	Clostridia	Oscillospirales	Butyricicoccaceae	Agathobaculum	Agathobaculum butyriciproducens	273603	2680046	2572.3	0.959795	102.089	945.726
HC13	Healthy	HC13_bin52	89	131861	42.71	31221	98.63	0	Bacteria	Bacillota_A	Clostridia	Oscillospirales	Ruminococcaceae	Hominimerdicola	Hominimerdicola aceti	624148	2778671	5867.96	2.11179	224.621	2080.83
HC13	Healthy	HC13_bin14	289	41749	41.6	13477.7	98.52	3.32	Bacteria	Bacillota_A	Clostridia	Lachnospirales	Lachnospiraceae	Blautia_A	Blautia_A obeum	1339430	3895065	12592.7	3.233	343.879	3185.61
HC13	Healthy	HC13_bin17	84	135253	48.3	44208.6	98.51	0.57	Bacteria	Bacteroidota	Bacteroidia	Bacteroidales	Bacteroidaceae	Paraprevotella	Paraprevotella clara	264726	3713522	2488.84	0.670209	71.287	660.385
HC13	Healthy	HC13_bin35	78	40682	56.52	39526.4	98.39	0.27	Bacteria	Bacillota_A	Clostridia	Christensenellales	Aristaeellaceae	Ventricola	Ventricola sp900542445	336358	3083060	3162.29	1.0257	109.099	1010.66
HC13	Healthy	HC13_bin64	153	44568	57.99	16919.1	98.32	2.95	Bacteria	Bacillota_A	Clostridia	Oscillospirales	Oscillospiraceae	Evtepia	Evtepia gabavorous	185389	2588626	1742.95	0.673309	71.6168	663.44
HC13	Healthy	HC13_bin12	216	63591	59.53	19007.3	98.22	0.59	Bacteria	Desulfobacterota	Desulfovibrionia	Desulfovibrionales	Desulfovibrionaceae	Bilophila	Bilophila wadsworthia	406365	4105572	3820.46	0.930556	98.9789	916.916
HC13	Healthy	HC13_bin57	105	10143	29.19	25824.4	98.11	0.31	Bacteria	Bacillota_I	Bacilli_A	Erysipelotrichales	Coprobacillaceae	Faecalibacillus	Faecalibacillus intestinalis	271800	2711558	2555.34	0.94239	100.238	928.576
HC13	Healthy	HC13_bin29	236	17601	44.53	13525.1	98.1	4.72	Bacteria	Bacillota_A	Clostridia	Lachnospirales	Lachnospiraceae	Blautia_A	Blautia_A fusiformis	456026	3191924	4287.36	1.34319	142.869	1323.5
HC13	Healthy	HC13_bin13	193	69052	41.02	20685.7	98.1	5	Bacteria	Bacillota_A	Clostridia	Lachnospirales	Lachnospiraceae	Anthropogastromicrobium	Anthropogastromicrobium aceti	555909	3992346	5226.41	1.30911	139.244	1289.92
HC13	Healthy	HC13_bin50	82	502461	50.76	34136.7	97.99	0	Bacteria	Bacillota_A	Clostridia	Oscillospirales	Ruminococcaceae	Ruminococcus_C	Ruminococcus_C sp000980705	518689	2799207	4876.49	1.7421	185.299	1716.56
HC13	Healthy	HC13_bin53	116	27853	37.94	23812.8	97.99	1.74	Bacteria	Bacillota_A	Clostridia	UBA1381	UBA1381	Hominilimicola	Hominilimicola fabiformis	263848	2762290	2480.58	0.898017	95.5178	884.853
HC13	Healthy	HC13_bin39	116	37131	44.56	26071.3	97.67	4.3	Bacteria	Bacillota_A	Clostridia	Lachnospirales	Lachnospiraceae	Suilimivivens	Suilimivivens aceti	236681	3024274	2225.17	0.73577	78.2604	724.985
HC13	Healthy	HC13_bin27	135	40324	47.87	24258.5	97.51	2.3	Bacteria	Bacillota_A	Clostridia	Lachnospirales	Lachnospiraceae	Gallintestinimicrobium	Gallintestinimicrobium propionicum	287772	3274897	2705.51	0.826135	87.8721	814.025
HC13	Healthy	HC13_bin90	16	339150	47.99	111944	97.4	1.25	Bacteria	Pseudomonadota	Gammaproteobacteria	Burkholderiales	Burkholderiaceae	Aphodousia	Aphodousia sp900553105	208579	1791112	1960.97	1.09483	116.452	1078.78
HC13	Healthy	HC13_bin10	83	274889	45.27	51198.2	97.31	0	Bacteria	Bacteroidota	Bacteroidia	Bacteroidales	Tannerellaceae	Parabacteroides	Parabacteroides merdae	989877	4249455	9306.39	2.19002	232.942	2157.92
HC13	Healthy	HC13_bin82	36	63378	47.92	57525.8	96.98	0	Bacteria	Bacillota_A	Clostridia	Lachnospirales	Anaerotignaceae	Anaerotignum	Anaerotignum faecicola	354010	2070930	3328.25	1.60713	170.943	1583.57
HC13	Healthy	HC13_bin56	63	16127	50.52	43312.2	96.87	1.58	Bacteria	Bacillota_A	Clostridia	Lachnospirales	Lachnospiraceae	Laedolimicola	Laedolimicola sp900553635	245773	2728668	2310.65	0.846805	90.0707	834.392
HC13	Healthy	HC13_bin28	94	41186	48.92	34042.6	96.8	2.6	Bacteria	Bacillota_A	Clostridia	Lachnospirales	Lachnospiraceae	Roseburia	Roseburia hominis	363249	3200006	3415.11	1.06722	113.515	1051.58
HC13	Healthy	HC13_bin45	144	225611	43.47	19865.1	96.31	1.92	Bacteria	Bacillota_A	Clostridia	Lachnospirales	Lachnospiraceae	Eubacterium_I	Eubacterium_I ramulus	250702	2860576	2356.99	0.823956	87.6404	811.879
HC13	Healthy	HC13_bin65	102	11247	41.76	25110.6	96	3.2	Bacteria	Bacillota_A	Clostridia	Lachnospirales	Lachnospiraceae	Mediterraneibacter	Mediterraneibacter torques	199050	2561278	1871.38	0.730643	77.7151	719.933
HC13	Healthy	HC13_bin36	132	66071	41.35	23330.4	95.61	4.29	Bacteria	Bacillota_A	Clostridia	Lachnospirales	Lachnospiraceae	Dorea_A	Dorea_A amylophila	843801	3079617	7933.05	2.57598	273.995	2538.23
HC13	Healthy	HC13_bin51	125	59302	41.09	22386.5	95.19	2.96	Bacteria	Bacillota_A	Clostridia	Lachnospirales	Lachnospiraceae	Dorea	Dorea formicigenerans	257142	2798308	2417.54	0.863928	91.892	851.264
HC13	Healthy	HC13_bin54	78	84296	26.88	35237.7	95.16	0.16	Bacteria	Bacillota_A	Clostridia	Clostridiales	Clostridiaceae	Clostridium	Clostridium sp900540255	234130	2748543	2201.19	0.800856	85.1833	789.117
HC13	Healthy	HC13_bin42	126	98014	37.05	23176.6	94.63	4.36	Bacteria	Bacillota_A	Clostridia	Lachnospirales	Lachnospiraceae	Anaerostipes	Anaerostipes hadrus	2264535	2920246	21290.2	7.29054	775.46	7183.67
HC13	Healthy	HC13_bin58	166	26591	57.83	16204.6	94.51	2.1	Bacteria	Bacillota_A	Clostridia	Oscillospirales	Ruminococcaceae	Gemmiger	Gemmiger sp900539695	526827	2689966	4953	1.84129	195.849	1814.3
HC13	Healthy	HC13_bin31	148	38649	46.1	21278.9	92.99	3.34	Bacteria	Bacillota_A	Clostridia	Lachnospirales	Lachnospiraceae	UBA3402	UBA3402 sp003478355	269831	3149276	2536.83	0.805529	85.6803	793.721
HC13	Healthy	HC13_bin48	62	116227	46.02	45500.3	92.62	0	Bacteria	Bacillota_A	Clostridia	Lachnospirales	Lachnospiraceae	Jutongia	Jutongia sp003524945	480788	2821017	4520.16	1.60231	170.431	1578.83
HC13	Healthy	HC13_bin38	282	20808	42.56	10763.6	92.27	3.72	Bacteria	Bacillota_A	Clostridia	Lachnospirales	Lachnospiraceae	Blautia_A	Blautia_A sp003477525	473200	3035344	4448.82	1.46567	155.897	1444.19
HC13	Healthy	HC13_bin66	191	30632	41.84	13394.9	92.01	3.64	Bacteria	Bacillota_A	Clostridia	Lachnospirales	Lachnospiraceae	Agathobacter	Agathobacter rectalis	119736	2558425	1125.71	0.439999	46.8007	433.55
HC13	Healthy	HC13_bin79	114	90824	60.41	19192.2	91.95	4.72	Bacteria	Bacillota_A	Clostridia	Oscillospirales	Oscillospiraceae	CAG-103	CAG-103 sp000432375	202416	2187910	1903.03	0.869792	92.5157	857.042
HC13	Healthy	HC13_bin71	139	33867	37.52	16629	90.5	1.9	Bacteria	Bacillota_A	Clostridia	Lachnospirales	Lachnospiraceae	Lachnospira	Lachnospira eligens_A	98920	2311438	930.002	0.402348	42.7959	396.45
HC13	Healthy	HC13_bin30	177	5269	59.52	17822.7	89.35	4.55	Bacteria	Bacillota_A	Clostridia	Oscillospirales	Oscillospiraceae	Lawsonibacter	Lawsonibacter asaccharolyticus	423670	3154615	3983.16	1.26265	134.302	1244.14
HC13	Healthy	HC13_bin85	27	4167	44.27	68986	89.26	0.34	Bacteria	Bacillota_A	Clostridia	Oscillospirales	Acutalibacteraceae	Fimenecus	Fimenecus sp000432435	1380837	1862623	12982	6.96975	741.34	6867.59
HC13	Healthy	HC13_bin63	178	21876	44.97	14597.6	88.88	4.01	Bacteria	Bacillota_A	Clostridia	Lachnospirales	Lachnospiraceae	Hominiventricola	Hominiventricola sp003480725	189374	2598369	1780.41	0.685203	72.8819	675.159
HC13	Healthy	HC13_bin86	200	3439	57.63	9301.58	88.38	0.81	Bacteria	Actinomycetota	Coriobacteriia	Coriobacteriales	Eggerthellaceae	Slackia	Slackia piriformis	63898	1860315	600.741	0.322924	34.3479	318.191
HC13	Healthy	HC13_bin67	72	42404	38.43	35497.4	86.58	1.34	Bacteria	Bacillota_A	Clostridia	Lachnospirales	Lachnospiraceae	Anaerobutyricum	Anaerobutyricum hallii	941878	2555811	8855.12	3.4647	368.524	3413.92
HC13	Healthy	HC13_bin46	88	74022	41.31	32495.4	84.81	0.1	Bacteria	Bacillota_A	Clostridia	Lachnospirales	Lachnospiraceae	Roseburia	Roseburia inulinivorans	270865	2859597	2546.55	0.890529	94.7214	877.475
HC13	Healthy	HC13_bin81	187	5615	43.88	11128.3	83.76	2.63	Bacteria	Bacillota_A	Clostridia	Lachnospirales	Lachnospiraceae	Lachnoclostridium_B	Lachnoclostridium_B ammoniilytica	98479	2080984	925.856	0.444913	47.3233	438.391
HC13	Healthy	HC13_bin95	171	3752	38.61	9455.06	83.28	0	Bacteria	Bacillota_A	Clostridia	Oscillospirales	Acutalibacteraceae	UMGS1071	UMGS1071 sp900542375	58989	1616815	554.589	0.343013	36.4847	337.985
HC13	Healthy	HC13_bin70	254	5138	43.81	9311.8	82.1	3.58	Bacteria	Bacillota_A	Clostridia	Lachnospirales	Lachnospiraceae	Coprococcus_A	Coprococcus_A catus	94129	2365198	884.959	0.374159	39.7975	368.674
HC13	Healthy	HC13_bin87	281	12275	49.89	6564.38	81.61	0	Bacteria	Bacillota_A	Clostridia	Peptostreptococcales	Anaerovoracaceae	Alangreenwoodia	Alangreenwoodia sp905206455	54069	1844592	508.333	0.27558	29.3122	271.541
HC13	Healthy	HC13_bin92	42	143797	29.49	41097.5	78.79	1.34	Bacteria	Bacillota_A	Clostridia	TANB77	CAG-508	CAG-245	CAG-245 sp000435175	191151	1726095	1797.12	1.04115	110.742	1025.89
HC13	Healthy	HC13_bin96	33	28724	26.74	44446.8	76.56	0.22	Bacteria	Bacillota_A	Clostridia	TANB77	CAG-508	CAG-273	CAG-273 sp000438355	238833	1466745	2245.4	1.53087	162.832	1508.43
HC13	Healthy	HC13_bin72	145	17137	58.17	15909.2	76.37	0.68	Bacteria	Bacillota_A	Clostridia	Oscillospirales	Ruminococcaceae	Gemmiger	Gemmiger sp900540775	1152619	2306839	10836.4	4.69752	499.653	4628.66
HC13	Healthy	HC13_bin88	220	16671	58.14	8293.18	72.88	3.58	Bacteria	Bacillota_A	Clostridia	Oscillospirales	Oscillospiraceae	Dysosmobacter	Dysosmobacter segnis	103599	1824499	973.992	0.533841	56.7822	526.016
LC01	Compensated liver cirrhosis	LC01_bin33	154	21407	43.75	14414.1	99.98	2.1	Bacteria	Bacillota_C	Negativicutes	Acidaminococcales	Acidaminococcaceae	Phascolarctobacterium	Phascolarctobacterium faecium	776622	2219770	6097	2.74668	349.866	1269.15
LC01	Compensated liver cirrhosis	LC01_bin10	57	130338	57.66	50576.2	99.63	4.33	Bacteria	Bacteroidota	Bacteroidia	Bacteroidales	Rikenellaceae	Alistipes_A	Alistipes_A ihumii	2276118	2882846	17869	6.1984	789.539	2864.07
LC01	Compensated liver cirrhosis	LC01_bin48	81	134705	50.23	25383.8	99.29	0	Bacteria	Bacillota_A	Clostridia	Peptostreptococcales	Anaerovoracaceae	Mogibacterium_A	Mogibacterium_A kristiansenii	1543083	2056084	12114.2	5.89189	750.496	2722.44
LC01	Compensated liver cirrhosis	LC01_bin57	84	20675	37.41	21426	99.25	2.18	Bacteria	Bacillota	Bacilli	Lactobacillales	Streptococcaceae	Streptococcus	Streptococcus lutetiensis	1046177	1799787	8213.19	4.56342	581.278	2108.6
LC01	Compensated liver cirrhosis	LC01_bin24	75	72086	52.95	32869.3	97.32	3.36	Bacteria	Bacillota_A	Clostridia	Oscillospirales	Acutalibacteraceae	Hominenteromicrobium	Hominenteromicrobium mulieris	1073083	2465201	8424.42	3.41733	435.292	1579.03
LC01	Compensated liver cirrhosis	LC01_bin37	83	42266	60.46	26014.5	96.61	1.69	Bacteria	Synergistota	Synergistia	Synergistales	Dethiosulfovibrionaceae	Pyramidobacter	Pyramidobacter piscolens	1955519	2159204	15352.1	7.11009	905.667	3285.33
LC01	Compensated liver cirrhosis	LC01_bin17	60	38834	58.38	44364.4	96.33	1.38	Bacteria	Desulfobacterota	Desulfovibrionia	Desulfovibrionales	Desulfovibrionaceae	Desulfovibrio	Desulfovibrio sp900319575	2237525	2661866	17566.1	6.59915	840.585	3049.24
LC01	Compensated liver cirrhosis	LC01_bin44	75	62202	47.26	28024	96.15	1.4	Bacteria	Bacillota_A	Clostridia	Christensenellales	Christensenellaceae	Scybalosoma	Scybalosoma faecavium	825739	2101800	6482.6	3.08431	392.872	1425.15
LC01	Compensated liver cirrhosis	LC01_bin15	131	14022	50.49	21197	95.73	0.21	Bacteria	Bacillota_A	Clostridia	Oscillospirales	Acutalibacteraceae	Clostridium_A	Clostridium_A leptum	1503683	2776803	11804.9	4.25126	541.516	1964.36
LC01	Compensated liver cirrhosis	LC01_bin11	273	16442	43.68	10545.1	95.26	0.38	Bacteria	Bacteroidota	Bacteroidia	Bacteroidales	Barnesiellaceae	Barnesiella	Barnesiella intestinihominis	565441	2878803	4439.09	1.54199	196.415	712.502
LC01	Compensated liver cirrhosis	LC01_bin2	857	1554	53.23	4927.64	95.24	2.38	Bacteria	Verrucomicrobiota	Verrucomicrobiae	Verrucomicrobiales	Akkermansiaceae	Akkermansia	Akkermansia muciniphila	4137314	4222990	32480.7	7.69139	979.712	3553.93
LC01	Compensated liver cirrhosis	LC01_bin34	149	6500	45.3	14818	94.97	0	Bacteria	Bacillota_A	Clostridia	Oscillospirales	Ruminococcaceae	Ruminiclostridium_E	Ruminiclostridium_E siraeum	608014	2207875	4773.32	2.16195	275.384	998.964
LC01	Compensated liver cirrhosis	LC01_bin31	77	4180	58.59	29729.7	94.91	1.41	Bacteria	Bacillota_A	Clostridia	Oscillospirales	Oscillospiraceae	Evtepia	Evtepia sp004556345	789395	2289190	6197.28	2.70719	344.836	1250.9
LC01	Compensated liver cirrhosis	LC01_bin8	189	36705	48.36	16059.4	94.64	2.49	Bacteria	Bacillota_A	Clostridia	Lachnospirales	Lachnospiraceae	Gallintestinimicrobium	Gallintestinimicrobium propionicum	1824347	3035230	14322.3	4.7187	601.057	2180.35
LC01	Compensated liver cirrhosis	LC01_bin35	188	3545	60.38	11656.1	94.11	3.35	Bacteria	Actinomycetota	Coriobacteriia	Coriobacteriales	Eggerthellaceae	Ellagibacter	Ellagibacter isourolithinifaciens	295272	2191347	2318.08	1.05783	134.745	488.789
LC01	Compensated liver cirrhosis	LC01_bin3	290	39767	60.52	12279.4	94.08	0.03	Bacteria	Desulfobacterota	Desulfovibrionia	Desulfovibrionales	Desulfovibrionaceae	Bilophila	Bilophila wadsworthia	673893	3561033	5290.51	1.48567	189.241	686.476
LC01	Compensated liver cirrhosis	LC01_bin41	146	18087	49.95	14583.1	93.97	0	Bacteria	Bacillota_A	Clostridia	Peptostreptococcales	Anaerovoracaceae	Alangreenwoodia	Alangreenwoodia sp905206455	418579	2129140	3286.12	1.5434	196.595	713.155
LC01	Compensated liver cirrhosis	LC01_bin45	117	107417	60.19	17907.2	93.76	0.92	Bacteria	Actinomycetota	Actinomycetes	Actinomycetales	Bifidobacteriaceae	Bifidobacterium	Bifidobacterium longum	2247249	2095146	17642.4	8.42061	1072.6	3890.88
LC01	Compensated liver cirrhosis	LC01_bin32	100	29938	42.18	22721.5	93.66	2.01	Bacteria	Bacillota_A	Clostridia	Lachnospirales	Lachnospiraceae	Mediterraneibacter	Mediterraneibacter torques	1246069	2272149	9782.47	4.30538	548.41	1989.37
LC01	Compensated liver cirrhosis	LC01_bin38	54	140964	52	39749.2	93.56	2.85	Bacteria	Bacillota_A	Clostridia	Oscillospirales	Ruminococcaceae	Negativibacillus	Negativibacillus sp000435195	2972700	2146455	23337.7	10.8727	1384.93	5023.89
LC01	Compensated liver cirrhosis	LC01_bin20	246	9963	53.57	10295.7	92.83	4.11	Bacteria	Bacillota_A	Clostridia	Lachnospirales	Lachnospiraceae	Alitiscatomonas	Alitiscatomonas aceti	346499	2532745	2720.25	1.07403	136.808	496.273
LC01	Compensated liver cirrhosis	LC01_bin29	244	27766	56.44	9474.73	92.82	1.36	Bacteria	Bacillota_A	Clostridia	Oscillospirales	Ruminococcaceae	Gemmiger	Gemmiger qucibialis	1200488	2311835	9424.63	4.07669	519.279	1883.7
LC01	Compensated liver cirrhosis	LC01_bin55	139	17044	34.49	13384.8	92.45	1.89	Bacteria	Bacillota_I	Bacilli_A	Erysipelotrichales	Coprobacillaceae	Catenibacterium	Catenibacterium faecis	755314	1860490	5929.72	3.18718	405.976	1472.69
LC01	Compensated liver cirrhosis	LC01_bin30	231	2741	37.54	9951.27	92.31	2.01	Bacteria	Bacillota_A	Clostridia	Lachnospirales	Lachnospiraceae	Anaerostipes	Anaerostipes hadrus	542326	2298744	4257.62	1.85215	235.923	855.816
LC01	Compensated liver cirrhosis	LC01_bin39	79	16004	56.78	26962.5	91.95	0	Bacteria	Bacillota_A	Clostridia	Oscillospirales	Oscillospiraceae	Onthomonas	Onthomonas sp003150485	658318	2130041	5168.23	2.42635	309.064	1121.14
LC01	Compensated liver cirrhosis	LC01_bin51	57	70401	47.68	35067.8	91.13	0.4	Bacteria	Bacillota_A	Clostridia	Peptostreptococcales	Anaerovoracaceae	Lentihominibacter	Lentihominibacter faecis	658894	1998863	5172.76	2.58785	329.634	1195.76
LC01	Compensated liver cirrhosis	LC01_bin14	317	11079	41.41	8807.6	90.42	2.65	Bacteria	Bacillota_A	Clostridia	Lachnospirales	Lachnospiraceae	Agathobacter	Agathobacter rectalis	2236000	2792010	17554.1	6.28726	800.857	2905.13
LC01	Compensated liver cirrhosis	LC01_bin7	145	65508	53.27	21181.9	89.93	0.34	Bacteria	Bacillota_A	Clostridia	Oscillospirales	Acutalibacteraceae	Acutalibacter	Acutalibacter timonensis	1115309	3071377	8755.92	2.85081	363.13	1317.26
LC01	Compensated liver cirrhosis	LC01_bin47	115	23357	57.75	17962.8	89.03	1.84	Bacteria	Actinomycetota	Coriobacteriia	Coriobacteriales	Eggerthellaceae	Slackia	Slackia piriformis	320567	2065726	2516.66	1.2183	155.184	562.933
LC01	Compensated liver cirrhosis	LC01_bin13	222	14257	47.58	12587.1	86.13	2.9	Bacteria	Bacillota_A	Clostridia	Lachnospirales	Lachnospiraceae	Acetatifactor	Acetatifactor acetigignens	529937	2794343	4160.36	1.48885	189.646	687.947
LC01	Compensated liver cirrhosis	LC01_bin12	321	4044	58.72	8902.02	86.02	2.63	Bacteria	Bacillota_A	Clostridia	Oscillospirales	Ruminococcaceae	Ruthenibacterium	Ruthenibacterium lactatiformans	2079934	2857547	16328.9	5.7143	727.874	2640.38
LC01	Compensated liver cirrhosis	LC01_bin22	45	87103	54.95	54786.1	80.98	1.39	Bacteria	Bacillota_B	Peptococcia	Peptococcales	Peptococcaceae	UMGS1590	UMGS1590 sp900552455	1829351	2465373	14361.6	5.82534	742.018	2691.69
LC01	Compensated liver cirrhosis	LC01_bin75	149	14058	37.02	7658.26	80.09	0.38	Bacteria	Bacillota_A	Clostridia	Lachnospirales	Lachnospiraceae	UBA4285	UBA4285 sp900545225	213551	1141080	1676.52	1.46924	187.148	678.885
LC01	Compensated liver cirrhosis	LC01_bin21	108	39944	58.11	22917.8	78.19	2.68	Bacteria	Bacillota_A	Clostridia	Oscillospirales	Oscillospiraceae	Vescimonas	Vescimonas sp000435975	2460645	2475121	19317.7	7.80475	994.151	3606.31
LC01	Compensated liver cirrhosis	LC01_bin18	404	9630	63.35	6518.52	77.94	0.34	Bacteria	Bacillota_A	Clostridia	Oscillospirales	Ruminococcaceae	Pygmaiobacter	Unclassified_Pygmaiobacter	382843	2633482	3005.57	1.14129	145.375	527.352
LC01	Compensated liver cirrhosis	LC01_bin28	177	12570	48.54	13346.7	76.63	4.27	Bacteria	Bacillota_A	Clostridia	Lachnospirales	Lachnospiraceae	Fusicatenibacter	Fusicatenibacter saccharivorans	794625	2362367	6238.34	2.64071	336.368	1220.18
LC01	Compensated liver cirrhosis	LC01_bin66	225	10981	62.6	6323.15	76.22	1.34	Bacteria	Bacillota_A	Clostridia	Oscillospirales	Oscillospiraceae	CAG-103	CAG-103 sp900543625	155671	1422709	1222.12	0.85901	109.419	396.919
LC01	Compensated liver cirrhosis	LC01_bin70	193	4075	45.66	6950.81	72.8	1.41	Bacteria	Actinomycetota	Coriobacteriia	Coriobacteriales	Eggerthellaceae	Anaerotardibacter	Anaerotardibacter sp000435475	93242	1341506	732.012	0.545664	69.5055	252.133
LC01	Compensated liver cirrhosis	LC01_bin9	423	9517	43.62	6956.69	72.31	3.21	Bacteria	Bacillota_A	Clostridia	Lachnospirales	Lachnospiraceae	Blautia_A	Blautia_A faecis	865093	2942678	6791.56	2.30795	293.982	1066.43
LC01	Compensated liver cirrhosis	LC01_bin69	183	12803	61.96	7347.84	70.74	2.68	Bacteria	Bacillota_A	Clostridia	Oscillospirales	Oscillospiraceae	Vescimonas	Vescimonas coprocola	261796	1344655	2055.27	1.52848	194.694	706.257
LC01	Compensated liver cirrhosis	LC01_bin16	381	16491	65.19	7099.72	70.42	3.29	Bacteria	Actinomycetota	Coriobacteriia	Coriobacteriales	Eggerthellaceae	CAJFUR01	CAJFUR01 sp904420575	280725	2704995	2203.88	0.814744	103.78	376.465
LC01	Compensated liver cirrhosis	LC01_bin52	252	6081	46.85	7763.65	70.08	0.67	Bacteria	Bacillota_A	Clostridia	Oscillospirales	Ruminococcaceae	Unclassified_Ruminococcaceae	Unclassified_Ruminococcaceae	215425	1956440	1691.23	0.864442	110.111	399.429
LC02	Compensated liver cirrhosis	LC02_bin23	86	48752	58.25	40084.3	100	0.04	Bacteria	Bacteroidota	Bacteroidia	Bacteroidales	Rikenellaceae	Alistipes	Alistipes shahii	428677	3447249	5318.61	1.54286	124.353	378.662
LC02	Compensated liver cirrhosis	LC02_bin56	111	137054	59.34	21401.5	100	1.97	Bacteria	Actinomycetota	Actinomycetes	Actinomycetales	Bifidobacteriaceae	Bifidobacterium	Bifidobacterium adolescentis	2834591	2375572	35168.9	14.8044	1193.22	3633.43
LC02	Compensated liver cirrhosis	LC02_bin8	86	101612	43.45	48111.8	99.46	0	Bacteria	Bacteroidota	Bacteroidia	Bacteroidales	Marinifilaceae	Odoribacter	Odoribacter splanchnicus	214724	4137617	2664.09	0.643871	51.8956	158.025
LC02	Compensated liver cirrhosis	LC02_bin57	81	50685	57.95	29183.8	99.46	0.81	Bacteria	Actinomycetota	Coriobacteriia	Coriobacteriales	Eggerthellaceae	Slackia	Slackia isoflavoniconvertens	1083052	2363888	13437.5	5.68448	458.166	1395.14
LC02	Compensated liver cirrhosis	LC02_bin29	83	119457	41.35	37403.2	99.42	2.14	Bacteria	Bacillota_A	Clostridia	Lachnospirales	Lachnospiraceae	Dorea_A	Dorea_A longicatena	854307	3104468	10599.4	3.41425	275.186	837.955
LC02	Compensated liver cirrhosis	LC02_bin5	117	225546	45.11	44152	99.42	3.08	Bacteria	Bacteroidota	Bacteroidia	Bacteroidales	Tannerellaceae	Parabacteroides	Parabacteroides distasonis	2939052	5165784	36464.9	7.05894	568.946	1732.47
LC02	Compensated liver cirrhosis	LC02_bin61	71	73952	49.94	30955	99.4	0.38	Bacteria	Bacillota_C	Negativicutes	Acidaminococcales	Acidaminococcaceae	Acidaminococcus	Acidaminococcus intestini	924820	2197802	11474.3	5.2208	420.793	1281.34
LC02	Compensated liver cirrhosis	LC02_bin49	41	103505	41.96	62023.4	99.37	0.65	Bacteria	Bacillota_A	Clostridia	Lachnospirales	Lachnospiraceae	Faecalimonas	Faecalimonas umbilicata	155053	2542958	1923.75	0.756501	60.9735	185.667
LC02	Compensated liver cirrhosis	LC02_bin15	171	145967	44.82	22715.8	99.32	4.05	Bacteria	Bacteroidota	Bacteroidia	Bacteroidales	Bacteroidaceae	Prevotella	Prevotella copri_B	1537849	3884401	19080.2	4.912	395.904	1205.55
LC02	Compensated liver cirrhosis	LC02_bin39	33	93497	61.37	83083.1	99.04	0.02	Bacteria	Bacteroidota	Bacteroidia	Bacteroidales	Rikenellaceae	Alistipes	Alistipes dispar	366171	2741743	4543.1	1.65701	133.554	406.679
LC02	Compensated liver cirrhosis	LC02_bin55	92	26268	42.81	26672.2	98.83	0.03	Bacteria	Bacillota_A	Clostridia	Lachnospirales	Lachnospiraceae	Mediterraneibacter	Mediterraneibacter lactaris	175336	2453838	2175.4	0.88653	71.4538	217.58
LC02	Compensated liver cirrhosis	LC02_bin46	36	35874	52.92	71807.7	98.66	0.67	Bacteria	Bacillota_A	Clostridia	Oscillospirales	Acutalibacteraceae	Hominenteromicrobium	Hominenteromicrobium mulieris	287061	2585078	3561.58	1.37775	111.045	338.139
LC02	Compensated liver cirrhosis	LC02_bin24	49	117482	64.06	68997.4	98.39	0	Bacteria	Actinomycetota	Coriobacteriia	Coriobacteriales	Eggerthellaceae	Eggerthella	Eggerthella lenta	335719	3380870	4165.28	1.23201	99.2996	302.372
LC02	Compensated liver cirrhosis	LC02_bin48	61	68530	57.98	41741.2	98.32	0.67	Bacteria	Bacillota_A	Clostridia	Oscillospirales	Oscillospiraceae	Evtepia	Evtepia gabavorous	460441	2546212	5712.71	2.24361	180.834	550.647
LC02	Compensated liver cirrhosis	LC02_bin62	50	24119	54.07	43900.9	98.08	1.44	Bacteria	Bacteroidota	Bacteroidia	Bacteroidales	Rikenellaceae	Alistipes	Alistipes putredinis	378392	2195044	4694.73	2.13878	172.385	524.92
LC02	Compensated liver cirrhosis	LC02_bin53	89	268935	62.24	28025.1	98.03	0.62	Bacteria	Pseudomonadota	Gammaproteobacteria	Burkholderiales	Burkholderiaceae	Sutterella	Sutterella wadsworthensis_A	141554	2494236	1756.27	0.70413	56.7524	172.814
LC02	Compensated liver cirrhosis	LC02_bin72	150	5352	36.69	12022.8	98.02	0	Bacteria	Pseudomonadota	Gammaproteobacteria	Enterobacterales	Succinivibrionaceae	Succinivibrio	Succinivibrio sp905186145	96170	1803416	1193.19	0.661625	53.3266	162.382
LC02	Compensated liver cirrhosis	LC02_bin43	31	50776	37.99	87603.9	97.99	1.01	Bacteria	Bacillota_A	Clostridia	UBA1381	UBA1381	Hominilimicola	Hominilimicola fabiformis	180403	2715720	2238.27	0.824189	66.4292	202.28
LC02	Compensated liver cirrhosis	LC02_bin38	100	107209	37.31	28051	97.99	3.36	Bacteria	Bacillota_A	Clostridia	Lachnospirales	Lachnospiraceae	Anaerostipes	Anaerostipes hadrus	1585345	2805105	19669.4	7.01202	565.164	1720.95
LC02	Compensated liver cirrhosis	LC02_bin44	275	12763	33.67	9655.6	97.98	2.7	Bacteria	Bacillota_I	Bacilli_A	Erysipelotrichales	Erysipelotrichaceae	Holdemanella	Holdemanella hominis	1890870	2655290	23460.1	8.83523	712.114	2168.42
LC02	Compensated liver cirrhosis	LC02_bin25	117	3157	44.16	28825.8	97.77	0.56	Bacteria	Bacteroidota	Bacteroidia	Bacteroidales	Bacteroidaceae	Phocaeicola	Phocaeicola plebeius	652703	3372614	8098.11	2.40114	193.53	589.309
LC02	Compensated liver cirrhosis	LC02_bin10	83	90319	45.39	49338	97.69	0	Bacteria	Bacteroidota	Bacteroidia	Bacteroidales	Tannerellaceae	Parabacteroides	Parabacteroides merdae	999718	4095055	12403.5	3.02891	244.128	743.382
LC02	Compensated liver cirrhosis	LC02_bin19	21	634656	60.11	173814	97.58	1.61	Bacteria	Actinomycetota	Coriobacteriia	Coriobacteriales	Eggerthellaceae	Raoultibacter	Raoultibacter timonensis	334670	3650093	4152.27	1.13758	91.6881	279.195
LC02	Compensated liver cirrhosis	LC02_bin3	307	44122	42.27	18940.9	97.51	3.59	Bacteria	Bacteroidota	Bacteroidia	Bacteroidales	Bacteroidaceae	Phocaeicola	Phocaeicola vulgatus	1929575	5814847	23940.3	4.1171	331.836	1010.46
LC02	Compensated liver cirrhosis	LC02_bin30	145	60159	43.17	21201.7	97.35	0.84	Bacteria	Bacteroidota	Bacteroidia	Bacteroidales	Bacteroidaceae	Phocaeicola	Phocaeicola sp900546645	145772	3074245	1808.6	0.588307	47.4172	144.388
LC02	Compensated liver cirrhosis	LC02_bin34	75	74916	57.49	38373.2	97.32	0.67	Bacteria	Bacillota_A	Clostridia	Oscillospirales	Oscillospiraceae	Lawsonibacter	Lawsonibacter sp000177015	345245	2877993	4283.47	1.48835	119.96	365.285
LC02	Compensated liver cirrhosis	LC02_bin59	55	195313	51.74	40529.6	97.32	0.67	Bacteria	Bacillota_A	Clostridia	Oscillospirales	Ruminococcaceae	Negativibacillus	Negativibacillus sp000435195	706249	2229126	8762.46	3.9309	316.828	964.756
LC02	Compensated liver cirrhosis	LC02_bin22	332	19632	54.58	10553.8	97.28	3.74	Bacteria	Bacillota_A	Clostridia	Oscillospirales	Ruminococcaceae	Gemmiger	Gemmiger qucibialis	3074259	3503847	38142.5	10.8859	877.395	2671.71
LC02	Compensated liver cirrhosis	LC02_bin14	131	25452	60.37	30238.6	97.05	3.49	Bacteria	Bacillota_A	Clostridia	Oscillospirales	Oscillospiraceae	Flavonifractor	Flavonifractor plautii	224029	3961254	2779.54	0.701681	56.5551	172.213
LC02	Compensated liver cirrhosis	LC02_bin26	125	157402	38.37	25681.1	96.64	1.34	Bacteria	Bacillota_A	Clostridia	Lachnospirales	Lachnospiraceae	Anaerobutyricum	Anaerobutyricum hallii	2374152	3210134	29456.2	9.17601	739.58	2252.06
LC02	Compensated liver cirrhosis	LC02_bin41	53	120257	45.19	51399.5	96.64	1.34	Bacteria	Bacillota_A	Clostridia	Lachnospirales	Lachnospiraceae	Frisingicoccus	Frisingicoccus sp900757195	666861	2724175	8273.77	3.03717	244.794	745.409
LC02	Compensated liver cirrhosis	LC02_bin36	149	28211	47.15	18960.2	96.53	0.37	Bacteria	Bacteroidota	Bacteroidia	Bacteroidales	Bacteroidaceae	Alloprevotella	Alloprevotella sp000437675	310607	2825073	3853.71	1.36411	109.947	334.793
LC02	Compensated liver cirrhosis	LC02_bin58	25	88944	44.09	91161.6	96.39	0.9	Bacteria	Bacillota_C	Negativicutes	Acidaminococcales	Acidaminococcaceae	Phascolarctobacterium	Phascolarctobacterium faecium	2064981	2279039	25620.3	11.2417	906.075	2759.04
LC02	Compensated liver cirrhosis	LC02_bin67	91	33918	56.74	23001.6	96.31	4.03	Bacteria	Bacillota_A	Clostridia	Oscillospirales	Oscillospiraceae	Pseudoscilispira	Pseudoscilispira sp937915065	86001	2093142	1067.02	0.509769	41.087	125.112
LC02	Compensated liver cirrhosis	LC02_bin35	87	137306	43.83	33018.4	95.98	0	Bacteria	Bacillota_A	Clostridia	Lachnospirales	Lachnospiraceae	Eubacterium_I	Eubacterium_I ramulus	1136999	2872598	14106.8	4.91081	395.809	1205.26
LC02	Compensated liver cirrhosis	LC02_bin68	93	86719	39.2	22068.2	95.97	0.67	Bacteria	Bacillota_A	Clostridia	Lachnospirales	Anaerotignaceae	Metalachnospira	Metalachnospira sp900548595	100597	2052344	1248.11	0.608139	49.0157	149.255
LC02	Compensated liver cirrhosis	LC02_bin52	139	20895	54.91	18155.1	94.97	2.01	Bacteria	Bacillota_A	Clostridia	Oscillospirales	Butyricicoccaceae	Agathobaculum	Agathobaculum butyriciproducens	340535	2523556	4225.03	1.67424	134.943	410.906
LC02	Compensated liver cirrhosis	LC02_bin50	67	31633	40.99	37788.4	94.74	0.29	Bacteria	Bacillota_A	Clostridia	Lachnospirales	Lachnospiraceae	Dorea_D	Dorea_D sp900543415	378513	2531822	4696.23	1.85488	149.502	455.241
LC02	Compensated liver cirrhosis	LC02_bin13	143	48375	42.74	27807.9	94.72	0	Bacteria	Bacillota_A	Clostridia	Lachnospirales	Lachnospiraceae	Blautia_A	Blautia_A faecis	1270844	3976535	15767.4	3.96511	319.586	973.154
LC02	Compensated liver cirrhosis	LC02_bin32	137	43438	58.82	21317.5	94.56	0.06	Bacteria	Bacillota_A	Clostridia	Oscillospirales	Ruminococcaceae	Ruthenibacterium	Ruthenibacterium lactatiformans	158578	2920499	1967.48	0.673681	54.2983	165.341
LC02	Compensated liver cirrhosis	LC02_bin33	105	5755	57.13	27684.7	93.54	0	Bacteria	Bacillota_A	Clostridia	Oscillospirales	Ruminococcaceae	Gemmiger	Gemmiger sp900539695	528960	2906897	6562.83	2.25768	181.967	554.099
LC02	Compensated liver cirrhosis	LC02_bin60	181	8111	47.75	12165.2	93.41	0	Bacteria	Bacillota_A	Clostridia	Oscillospirales	Ruminococcaceae	Massiliimalia	Massiliimalia timonensis	67187	2201895	833.592	0.378579	30.5133	92.9144
LC02	Compensated liver cirrhosis	LC02_bin65	215	12810	45.97	9926.25	92.95	0.36	Bacteria	Bacillota_A	Clostridia	Lachnospirales	Anaerotignaceae	Anaerotignum	Anaerotignum sp001304995	72048	2134143	893.903	0.418858	33.7597	102.8
LC02	Compensated liver cirrhosis	LC02_bin9	121	58030	59.41	33956.7	92.9	0	Bacteria	Desulfobacterota	Desulfovibrionia	Desulfovibrionales	Desulfovibrionaceae	Bilophila	Bilophila wadsworthia	554161	4108764	6875.5	1.67337	134.873	410.695
LC02	Compensated liver cirrhosis	LC02_bin7	41	535479	53.89	110365	91.94	0.51	Bacteria	Pseudomonadota	Gammaproteobacteria	Enterobacterales	Enterobacteriaceae	Kluyvera	Kluyvera cryocrescens	1221054	4524977	15149.7	3.34801	269.848	821.699
LC02	Compensated liver cirrhosis	LC02_bin47	167	30692	42.22	15277.4	91.4	2.03	Bacteria	Bacillota_A	Clostridia	Lachnospirales	Lachnospiraceae	Roseburia	Roseburia inulinivorans	96724	2551331	1200.06	0.470366	37.9112	115.441
LC02	Compensated liver cirrhosis	LC02_bin54	84	57859	39.52	29356.3	90.38	0.38	Bacteria	Bacteroidota	Bacteroidia	Bacteroidales	Muribaculaceae	Limisoma	Limisoma sp900541935	202190	2465926	2508.58	1.0173	81.9935	249.674
LC02	Compensated liver cirrhosis	LC02_bin28	116	64096	42.31	26946.7	87.89	0.37	Bacteria	Bacteroidota	Bacteroidia	Bacteroidales	Bacteroidaceae	Phocaeicola	Phocaeicola massiliensis	184157	3125822	2284.84	0.730958	58.9147	179.398
LC02	Compensated liver cirrhosis	LC02_bin70	32	212126	50.22	59235.6	87.47	0.62	Bacteria	Pseudomonadota	Gammaproteobacteria	Burkholderiales	Burkholderiaceae	Sutterella	Sutterella sp905186105	210718	1895540	2614.39	1.37923	111.165	338.503
LC02	Compensated liver cirrhosis	LC02_bin42	159	24500	40.93	17096.4	85.06	0	Bacteria	Bacillota_A	Clostridia	Lachnospirales	Lachnospiraceae	Blautia_A	Blautia_A sp003471165	629205	2718332	7806.57	2.87183	231.467	704.829
LC02	Compensated liver cirrhosis	LC02_bin11	566	4618	40.62	7164.93	84.09	4.05	Bacteria	Bacillota_A	Clostridia	Lachnospirales	Lachnospiraceae	Blautia_A	Blautia_A wexlerae	948044	4055350	11762.4	2.90047	233.776	711.86
LC02	Compensated liver cirrhosis	LC02_bin31	261	7310	43.57	11563.4	83.76	2.87	Bacteria	Bacillota_A	Clostridia	Lachnospirales	Lachnospiraceae	Blautia_A	Blautia_A caecimuris	555225	3018044	6888.7	2.28251	183.968	560.193
LC02	Compensated liver cirrhosis	LC02_bin71	178	44077	60.03	10551.8	82.75	4.8	Bacteria	Actinomycetota	Coriobacteriia	Coriobacteriales	Coriobacteriaceae	Collinsella	Unclassified_Collinsella	885560	1878223	10987.2	5.84977	471.488	1435.7
LC02	Compensated liver cirrhosis	LC02_bin64	103	5545	60.46	20886.2	82.06	1.96	Bacteria	Actinomycetota	Coriobacteriia	Coriobacteriales	Coriobacteriaceae	Collinsella	Collinsella tanakaei	78616	2151273	975.392	0.453402	36.5439	111.278
LC02	Compensated liver cirrhosis	LC02_bin20	82	111064	46.66	44503.4	80.26	3.15	Bacteria	Bacteroidota	Bacteroidia	Bacteroidales	Bacteroidaceae	Bacteroides	Bacteroides uniformis	1039868	3649281	12901.7	3.53541	284.951	867.691
LC02	Compensated liver cirrhosis	LC02_bin73	161	22592	59.84	10948.5	79.24	0.9	Bacteria	Actinomycetota	Coriobacteriia	Coriobacteriales	Coriobacteriaceae	Collinsella	Unclassified_Collinsella	726589	1762715	9014.82	5.11417	412.199	1255.17
LC02	Compensated liver cirrhosis	LC02_bin45	48	58913	56.57	54704.3	78.47	1.36	Bacteria	Verrucomicrobiota	Verrucomicrobiae	Verrucomicrobiales	Akkermansiaceae	Akkermansia	Akkermansia biwaensis	3013555	2625806	37389.3	14.2392	1147.67	3494.71
LC02	Compensated liver cirrhosis	LC02_bin69	242	5934	54.92	7961.76	76.85	0	Bacteria	Bacillota_A	Clostridia	Oscillospirales	Acutalibacteraceae	Anaeromassilibacillus	Anaeromassilibacillus stercoravium	51189	1926747	635.104	0.329625	26.5676	80.8996
LC02	Compensated liver cirrhosis	LC02_bin51	41	6221	41.6	61716	70.21	3.48	Bacteria	Bacillota_A	Clostridia	Lachnospirales	Lachnospiraceae	Roseburia_C	Roseburia_C amylophila	802117	2530356	9951.9	3.933	316.998	965.273
LC03	Compensated liver cirrhosis	LC03_bin22	127	69097	38.77	14595.3	99.46	0	Bacteria	Bacillota	Bacilli	Lactobacillales	Lactobacillaceae	Limosilactobacillus	Limosilactobacillus reuteri	1958536	1853604	58567.4	31.5965	1056.61	24968.8
LC03	Compensated liver cirrhosis	LC03_bin10	378	15493	37.32	7949.61	99.33	4.45	Bacteria	Bacillota_A	Clostridia	Lachnospirales	Lachnospiraceae	Anaerostipes	Anaerostipes hadrus	1209094	3004951	36156.3	12.0323	402.367	9508.37
LC03	Compensated liver cirrhosis	LC03_bin15	347	28117	53.1	6640.89	99.19	1.08	Bacteria	Bacillota_A	Clostridia	Christensenellales	CAG-138	SFEL01	SFEL01 sp004557245	666877	2304388	19942.1	8.65395	289.394	6838.7
LC03	Compensated liver cirrhosis	LC03_bin1	467	14831	45.26	10097.7	99.14	2.7	Bacteria	Bacteroidota	Bacteroidia	Bacteroidales	Tannerellaceae	Parabacteroides	Parabacteroides merdae	1572063	4715612	47010.4	9.9691	333.374	7877.99
LC03	Compensated liver cirrhosis	LC03_bin17	109	64180	60.01	20529.3	98.92	0.81	Bacteria	Actinomycetota	Coriobacteriia	Coriobacteriales	Coriobacteriaceae	Collinsella	Unclassified_Collinsella	1486261	2237698	44444.6	19.8618	664.192	15695.6
LC03	Compensated liver cirrhosis	LC03_bin6	364	34447	41.66	9780.86	98.06	4.6	Bacteria	Bacillota_A	Clostridia	Lachnospirales	Lachnospiraceae	Blautia_A	Blautia_A obeum	1164723	3560234	34829.5	9.78292	327.148	7730.85
LC03	Compensated liver cirrhosis	LC03_bin16	630	2641	51.83	3588.03	98.05	1.96	Bacteria	Bacillota_A	Clostridia	Oscillospirales	Ruminococcaceae	Negativibacillus	Negativibacillus sp000435195	274013	2260462	8193.99	3.62492	121.22	2864.56
LC03	Compensated liver cirrhosis	LC03_bin11	646	3716	56.81	4127.46	97.56	3.79	Bacteria	Bacillota_A	Clostridia	Oscillospirales	Ruminococcaceae	Faecalibacterium	Faecalibacterium prausnitzii	407484	2666339	12185.3	4.57003	152.825	3611.42
LC03	Compensated liver cirrhosis	LC03_bin21	222	19954	45.07	8562.02	97.36	2.22	Bacteria	Bacillota_C	Negativicutes	Veillonellales	Dialisteraceae	Dialister	Dialister invisus	928990	1900769	27780.2	14.6152	488.744	11549.5
LC03	Compensated liver cirrhosis	LC03_bin9	523	4104	51.27	5932.28	97.32	1.59	Bacteria	Bacillota_A	Clostridia	Oscillospirales	Acutalibacteraceae	Fimivicinus	Fimivicinus sp900544375	699153	3102581	20907.2	6.73866	225.346	5325.16
LC03	Compensated liver cirrhosis	LC03_bin19	464	3929	41.22	4491.17	96.48	0.84	Bacteria	Bacillota_A	Clostridia	Oscillospirales	Acutalibacteraceae	Ruminococcus_E	Ruminococcus_E bromii_B	337428	2083903	10090.3	4.84203	161.921	3826.37
LC03	Compensated liver cirrhosis	LC03_bin2	527	5326	46.56	8292.79	96.31	0.51	Bacteria	Bacteroidota	Bacteroidia	Bacteroidales	Bacteroidaceae	Bacteroides	Bacteroides uniformis	856788	4370298	25621.1	5.86255	196.048	4632.82
LC03	Compensated liver cirrhosis	LC03_bin13	209	10366	41.83	11340.6	93.24	2.93	Bacteria	Bacillota_A	Clostridia	Lachnospirales	Lachnospiraceae	Dorea_D	Dorea_D sp000433535	837173	2370185	25034.5	10.5623	353.21	8346.73
LC03	Compensated liver cirrhosis	LC03_bin8	174	108929	57.26	18259.8	91.28	0.67	Bacteria	Bacillota_A	Clostridia	Oscillospirales	Oscillospiraceae	Vescimonas	Vescimonas sp000435975	5957263	3177212	178144	56.0693	1875	44308.2
LC03	Compensated liver cirrhosis	LC03_bin3	1448	1195	43.25	2969.27	90.23	3.57	Bacteria	Bacteroidota	Bacteroidia	Bacteroidales	Bacteroidaceae	Phocaeicola	Phocaeicola vulgatus	516192	4299497	15436	3.59019	120.059	2837.12
LC03	Compensated liver cirrhosis	LC03_bin4	1187	3057	45.92	3478.07	89.27	2.27	Bacteria	Bacteroidota	Bacteroidia	Bacteroidales	Tannerellaceae	Parabacteroides	Parabacteroides distasonis	411024	4128468	12291.1	2.97716	99.5585	2352.67
LC03	Compensated liver cirrhosis	LC03_bin12	544	1496	57.25	4642.58	81.79	0	Bacteria	Verrucomicrobiota	Verrucomicrobiae	Verrucomicrobiales	Akkermansiaceae	Akkermansia	Akkermansia sp004167605	205897	2525564	6157.07	2.4379	81.5252	1926.53
LC04	Compensated liver cirrhosis	LC04_bin14	147	21861	50.46	23979.8	100	0.32	Bacteria	Bacillota_I	Bacilli_A	Erysipelotrichales	Erysipelotrichaceae	Holdemania	Holdemania filiformis	168113	3525030	2047.98	0.580983	47.6912	336.589
LC04	Compensated liver cirrhosis	LC04_bin11	93	37040	64.01	38449	100	0.4	Bacteria	Actinomycetota	Coriobacteriia	Coriobacteriales	Eggerthellaceae	Eggerthella	Eggerthella lenta	675631	3575755	8230.65	2.30179	188.948	1333.53
LC04	Compensated liver cirrhosis	LC04_bin28	101	39091	44.2	28559.4	100	3.34	Bacteria	Bacillota_A	Clostridia	Lachnospirales	Lachnospiraceae	Hominisplanchenecus	Hominisplanchenecus faecis	220610	2884502	2687.51	0.931707	76.4811	539.778
LC04	Compensated liver cirrhosis	LC04_bin4	96	193985	44.97	46661.1	99.62	1.09	Bacteria	Bacteroidota	Bacteroidia	Bacteroidales	Tannerellaceae	Parabacteroides	Parabacteroides merdae	1388003	4479467	16908.9	3.77476	309.859	2186.88
LC04	Compensated liver cirrhosis	LC04_bin23	59	125540	52.06	52327.3	99.37	0.63	Bacteria	Bacillota_A	Clostridia	Lachnospirales	Lachnospiraceae	Alitiscatomonas	Alitiscatomonas aceti	555674	3087309	6769.32	2.19263	179.987	1270.28
LC04	Compensated liver cirrhosis	LC04_bin22	59	129511	50.07	52628	99.33	0	Bacteria	Bacillota_A	Clostridia	Oscillospirales	Acutalibacteraceae	Clostridium_A	Clostridium_A leptum	517298	3105054	6301.81	2.02953	166.599	1175.8
LC04	Compensated liver cirrhosis	LC04_bin9	113	98095	27.94	32259.8	99.19	2.42	Bacteria	Bacillota_A	Clostridia	Clostridiales	Clostridiaceae	Clostridium	Clostridium saudiense	2446692	3645357	29806	8.17644	671.18	4736.96
LC04	Compensated liver cirrhosis	LC04_bin45	44	49886	41.63	57301.7	99.1	0.94	Bacteria	Bacillota_A	Clostridia	Lachnospirales	Lachnospiraceae	Dorea_A	Dorea_A longicatena	2059880	2521275	25093.8	9.95283	816.999	5766.11
LC04	Compensated liver cirrhosis	LC04_bin15	115	19188	47.05	30248.2	98.95	3.31	Bacteria	Bacillota_A	Clostridia	Lachnospirales	Lachnospiraceae	Fusicatenibacter	Fusicatenibacter saccharivorans	1055930	3478537	12863.5	3.69797	303.556	2142.39
LC04	Compensated liver cirrhosis	LC04_bin30	115	34230	41.55	24619.1	98.78	0.29	Bacteria	Bacillota_A	Clostridia	Lachnospirales	Lachnospiraceae	Mediterraneibacter	Mediterraneibacter torques	723442	2831195	8813.1	3.11285	255.525	1803.41
LC04	Compensated liver cirrhosis	LC04_bin43	116	128983	35.18	21892.3	98.73	0.69	Bacteria	Bacillota_A	Clostridia	Lachnospirales	Lachnospiraceae	Eubacterium_G	Eubacterium_G segne	138816	2539503	1691.08	0.66591	54.6627	385.791
LC04	Compensated liver cirrhosis	LC04_bin33	61	101665	48.8	45943.8	98.73	3.16	Bacteria	Bacillota_A	Clostridia	Lachnospirales	Lachnospiraceae	Otoolea	Otoolea fessa	238552	2802573	2906.08	1.03693	85.1189	600.741
LC04	Compensated liver cirrhosis	LC04_bin50	30	324218	51.73	78637.8	98.66	0.67	Bacteria	Bacillota_A	Clostridia	Oscillospirales	Ruminococcaceae	Negativibacillus	Negativibacillus sp000435195	481040	2359135	5860.11	2.48401	203.905	1439.09
LC04	Compensated liver cirrhosis	LC04_bin49	86	109766	45.1	27632	98.66	1.01	Bacteria	Bacillota_A	Clostridia	Oscillospirales	Acutalibacteraceae	Fimenecus	Fimenecus sp000432435	845743	2376348	10303	4.33564	355.9	2511.82
LC04	Compensated liver cirrhosis	LC04_bin19	103	116854	47.81	31095.2	98.66	2.68	Bacteria	Bacillota_A	Clostridia	Lachnospirales	Lachnospiraceae	Gallintestinimicrobium	Gallintestinimicrobium propionicum	966732	3202807	11776.9	3.67706	301.839	2130.28
LC04	Compensated liver cirrhosis	LC04_bin47	57	80009	58.18	44068.6	98.32	2.68	Bacteria	Bacillota_A	Clostridia	Oscillospirales	Oscillospiraceae	Evtepia	Evtepia gabavorous	436374	2511910	5315.98	2.11631	173.722	1226.07
LC04	Compensated liver cirrhosis	LC04_bin63	34	230170	45.4	54605.6	98.1	0.63	Bacteria	Bacillota_C	Negativicutes	Veillonellales	Dialisteraceae	Dialister	Dialister invisus	789011	1856589	9611.87	5.17717	424.979	2999.36
LC04	Compensated liver cirrhosis	LC04_bin6	77	205371	52.41	49423.7	97.99	1.68	Bacteria	Bacillota_A	Clostridia	Oscillospirales	Acutalibacteraceae	Acutalibacter	Acutalibacter timonensis	870530	3805624	10604.9	2.78665	228.748	1614.43
LC04	Compensated liver cirrhosis	LC04_bin21	43	121526	58.07	73164.3	97.96	1.36	Bacteria	Verrucomicrobiota	Verrucomicrobiae	Verrucomicrobiales	Akkermansiaceae	Akkermansia	Akkermansia massiliensis	5173611	3146065	63025.8	20.0332	1644.47	11606.1
LC04	Compensated liver cirrhosis	LC04_bin60	25	91175	38.69	79693.4	97.52	0.71	Bacteria	Bacillota_A	Clostridia	Peptostreptococcales	Anaerovoracaceae	Lentihominibacter	Lentihominibacter sp902495595	193051	1992334	2351.78	1.18041	96.8969	683.866
LC04	Compensated liver cirrhosis	LC04_bin24	74	34078	44.31	41480.7	97.47	1.9	Bacteria	Bacillota_A	Clostridia	Lachnospirales	Lachnospiraceae	Oliverpabstia	Oliverpabstia intestinalis	463926	3069569	5651.63	1.84118	151.137	1066.68
LC04	Compensated liver cirrhosis	LC04_bin7	133	141547	46.03	28172.9	97.41	1.2	Bacteria	Bacteroidota	Bacteroidia	Bacteroidales	Bacteroidaceae	Bacteroides	Bacteroides stercoris	2479015	3746991	30199.8	8.05975	661.602	4669.36
LC04	Compensated liver cirrhosis	LC04_bin32	214	47722	41.36	13186.5	97.11	1.84	Bacteria	Bacillota_A	Clostridia	Lachnospirales	Lachnospiraceae	Agathobacter	Agathobacter rectalis	2954118	2821902	35987.6	12.753	1046.85	7388.34
LC04	Compensated liver cirrhosis	LC04_bin26	27	250280	44.96	111931	97.08	0.88	Bacteria	Bacillota_A	Clostridia	Lachnospirales	Lachnospiraceae	Sellimonas	Sellimonas intestinalis	511082	3022133	6226.09	2.06016	169.113	1193.54
LC04	Compensated liver cirrhosis	LC04_bin62	19	234729	36.42	98133.2	96.64	0	Bacteria	Bacillota_A	Clostridia	Oscillospirales	Acutalibacteraceae	Eubacterium_R	Eubacterium_R sp000434995	223556	1864530	2723.4	1.46064	119.899	846.209
LC04	Compensated liver cirrhosis	LC04_bin39	67	79903	60	39179.9	96.64	0.67	Bacteria	Bacillota_A	Clostridia	Oscillospirales	Oscillospiraceae	Lawsonibacter	Lawsonibacter sp900066825	620503	2625054	7559.08	2.87959	236.377	1668.27
LC04	Compensated liver cirrhosis	LC04_bin44	55	21384	42.48	46055.2	96.49	0	Bacteria	Bacillota_A	Clostridia	Lachnospirales	Lachnospiraceae	Bariatricus	Bariatricus comes	807147	2533034	9832.81	3.88183	318.648	2248.91
LC04	Compensated liver cirrhosis	LC04_bin5	77	313812	46.29	55656.3	96.49	1.81	Bacteria	Bacteroidota	Bacteroidia	Bacteroidales	Bacteroidaceae	Bacteroides	Bacteroides uniformis	2220250	4285532	27047.5	6.31135	518.08	3656.44
LC04	Compensated liver cirrhosis	LC04_bin16	173	51486	57.6	19857.2	96.04	0.23	Bacteria	Bacillota_A	Clostridia	Oscillospirales	Ruminococcaceae	Ruthenibacterium	Ruthenibacterium lactatiformans	357090	3435298	4350.13	1.2663	103.947	733.625
LC04	Compensated liver cirrhosis	LC04_bin31	68	33282	44.36	41516	95.91	4.78	Bacteria	Bacillota_A	Clostridia	Lachnospirales	Lachnospiraceae	Lachnoclostridium_B	Lachnoclostridium_B faecipullorum	182899	2823090	2228.11	0.789244	64.7868	457.244
LC04	Compensated liver cirrhosis	LC04_bin25	263	47320	54.93	11582.2	95.58	1.36	Bacteria	Bacillota_A	Clostridia	Oscillospirales	Ruminococcaceae	Gemmiger	Gemmiger qucibialis	440529	3046122	5366.6	1.76178	144.62	1020.68
LC04	Compensated liver cirrhosis	LC04_bin41	65	44644	29.18	39247.7	95.28	0.94	Bacteria	Bacillota_I	Bacilli_A	Erysipelotrichales	Coprobacillaceae	Faecalibacillus	Faecalibacillus intestinalis	190657	2551099	2322.62	0.910438	74.7352	527.456
LC04	Compensated liver cirrhosis	LC04_bin18	145	21742	57.46	22364	95.24	0.68	Bacteria	Bacillota_A	Clostridia	Oscillospirales	Ruminococcaceae	Gemmiger	Gemmiger formicilis	2926380	3242784	35649.7	10.9935	902.428	6369.04
LC04	Compensated liver cirrhosis	LC04_bin10	90	85735	61.25	40469.5	95.1	0.22	Bacteria	Bacillota_A	Clostridia	Oscillospirales	Oscillospiraceae	Flavonifractor	Flavonifractor plautii	478093	3642255	5824.21	1.59907	131.263	926.409
LC04	Compensated liver cirrhosis	LC04_bin40	41	63870	43.64	63510.7	94.29	1.76	Bacteria	Bacillota_A	Clostridia	Lachnospirales	Lachnospiraceae	Agathobacter	Agathobacter faecis	411193	2603940	5009.22	1.92371	157.912	1114.49
LC04	Compensated liver cirrhosis	LC04_bin42	25	727409	28.75	101941	93.66	0	Bacteria	Bacillota_A	Clostridia	Peptostreptococcales	Peptostreptococcaceae	Intestinibacter	Intestinibacter bartlettii	212725	2548534	2591.45	1.01684	83.4696	589.1
LC04	Compensated liver cirrhosis	LC04_bin46	84	33620	41.01	29940.2	93.57	0.58	Bacteria	Bacillota_A	Clostridia	Lachnospirales	Lachnospiraceae	Dorea_D	Dorea_D sp900543415	342235	2514976	4169.17	1.65774	136.079	960.399
LC04	Compensated liver cirrhosis	LC04_bin55	147	52926	49.18	15056.8	92.08	1.44	Bacteria	Bacillota_A	Clostridia	Peptostreptococcales	Anaerovoracaceae	Lentihominibacter	Lentihominibacter excrementipullorum	85286	2213347	1038.97	0.469411	38.5326	271.95
LC04	Compensated liver cirrhosis	LC04_bin35	116	105891	34.11	23691.6	91.6	2.12	Bacteria	Bacillota	Bacilli	MOL361	Turicibacteraceae	Turicibacter	Turicibacter bilis	1180393	2748224	14379.8	5.23238	429.511	3031.35
LC04	Compensated liver cirrhosis	LC04_bin61	80	73248	27.54	24160	91.55	1.06	Bacteria	Bacillota_A	Clostridia	Peptostreptococcales	Peptostreptococcaceae	Romboutsia	Romboutsia timonensis	274975	1932801	3349.79	1.73313	142.268	1004.08
LC04	Compensated liver cirrhosis	LC04_bin3	32	94046	43.31	145975	89.98	0.37	Bacteria	Bacteroidota	Bacteroidia	Bacteroidales	Bacteroidaceae	Bacteroides	Bacteroides fragilis	1846835	4671207	22498.5	4.81641	395.366	2790.36
LC04	Compensated liver cirrhosis	LC04_bin65	138	7412	42.4	12330.8	89.62	1.31	Bacteria	Bacillota	Bacilli	Lactobacillales	Streptococcaceae	Streptococcus	Streptococcus parasanguinis_I	323874	1701655	3945.49	2.31862	190.329	1343.28
LC04	Compensated liver cirrhosis	LC04_bin53	25	40747	44	92062.1	88.26	0.67	Bacteria	Bacillota_A	Clostridia	Lachnospirales	Lachnospiraceae	Frisingicoccus	Frisingicoccus caecimuris	256195	2301553	3121.01	1.35605	111.314	785.617
LC04	Compensated liver cirrhosis	LC04_bin29	39	95721	44.08	73349.7	87.94	0.21	Bacteria	Bacillota_A	Clostridia	Lachnospirales	Lachnospiraceae	UMGS1370	Unclassified_UMGS1370	178647	2860640	2176.31	0.760777	62.45	440.751
LC04	Compensated liver cirrhosis	LC04_bin2	446	17062	41.14	10672.1	87.82	3.46	Bacteria	Bacteroidota	Bacteroidia	Bacteroidales	Bacteroidaceae	Phocaeicola	Phocaeicola vulgatus	2062452	4759770	25125.1	5.27865	433.309	3058.15
LC04	Compensated liver cirrhosis	LC04_bin12	403	18815	42.71	8800.23	86.18	4.45	Bacteria	Bacillota_A	Clostridia	Lachnospirales	Lachnospiraceae	Blautia_A	Blautia_A faecis	675021	3546492	8223.22	2.31869	190.335	1343.32
LC04	Compensated liver cirrhosis	LC04_bin17	99	91730	44.27	32841.4	85.29	0	Bacteria	Bacillota_I	Bacilli_A	Erysipelotrichales	Erysipelotrichaceae	Clostridium_AQ	Clostridium_AQ innocuum	806287	3251301	9822.33	3.02105	247.989	1750.22
LC04	Compensated liver cirrhosis	LC04_bin58	42	41049	61.94	47855.4	84.9	0	Bacteria	Bacillota_A	Clostridia	Oscillospirales	Oscillospiraceae	Dysosmobacter	Dysosmobacter welbionis	201845	2009925	2458.91	1.22338	100.424	708.76
LC04	Compensated liver cirrhosis	LC04_bin57	89	49783	36.75	22818.6	82.8	1.34	Bacteria	Bacillota_A	Clostridia	Lachnospirales	Lachnospiraceae	Anaerostipes	Anaerostipes amylophilus	324689	2030858	3955.42	1.94766	159.878	1128.36
LC04	Compensated liver cirrhosis	LC04_bin48	61	70185	43.16	40897.7	82.52	1.36	Bacteria	Bacillota_A	Clostridia	Lachnospirales	Lachnospiraceae	Ruminococcus_B	Ruminococcus_B gnavus	181342	2494758	2209.14	0.885513	72.6892	513.016
LC04	Compensated liver cirrhosis	LC04_bin27	333	18746	42.02	8751.68	79.77	1.96	Bacteria	Bacillota_A	Clostridia	Lachnospirales	Lachnospiraceae	Blautia_A	Blautia_A wexlerae	1913874	2914308	23315.1	8.00023	656.716	4634.88
LC04	Compensated liver cirrhosis	LC04_bin54	248	15393	50.59	9055.33	77.49	1.03	Bacteria	Bacillota_A	Clostridia	Lachnospirales	Lachnospiraceae	Roseburia	Roseburia hominis	82262	2245722	1002.13	0.44624	36.6305	258.526
LC04	Compensated liver cirrhosis	LC04_bin37	37	89495	30.93	73352.3	77.19	0	Bacteria	Bacillota_I	Bacilli_A	Erysipelotrichales	Coprobacillaceae	Coprobacillus	Coprobacillus cateniformis	180448	2714036	2198.25	0.809956	66.487	469.243
LC04	Compensated liver cirrhosis	LC04_bin52	132	35887	41.02	17560.5	71.79	1.17	Bacteria	Bacillota_A	Clostridia	Lachnospirales	Lachnospiraceae	Mediterraneibacter	Mediterraneibacter faecis	1440523	2317981	17548.7	7.57068	621.456	4386.03
LC05	Compensated liver cirrhosis	LC05_bin48	70	119539	49.96	32108.7	100	0	Bacteria	Bacillota_C	Negativicutes	Acidaminococcales	Acidaminococcaceae	Acidaminococcus	Acidaminococcus intestini	709572	2247608	9995.4	4.44713	315.701	3377.51
LC05	Compensated liver cirrhosis	LC05_bin47	29	329801	60.36	78233.8	100	0.12	Bacteria	Actinomycetota	Actinomycetes	Actinomycetales	Bifidobacteriaceae	Bifidobacterium	Bifidobacterium longum	161467	2268781	2274.51	1.00252	71.1691	761.398
LC05	Compensated liver cirrhosis	LC05_bin29	83	71960	41.29	33713.9	99.42	0.58	Bacteria	Bacillota_A	Clostridia	Lachnospirales	Lachnospiraceae	Dorea_A	Dorea_A longicatena	2123554	2798253	29913.5	10.6901	758.886	8118.89
LC05	Compensated liver cirrhosis	LC05_bin19	49	171483	52.21	62643.8	99.37	0	Bacteria	Bacillota_A	Clostridia	Lachnospirales	Lachnospiraceae	Alitiscatomonas	Alitiscatomonas aceti	775360	3069544	10922.1	3.55822	252.598	2702.4
LC05	Compensated liver cirrhosis	LC05_bin9	58	299456	50.25	59907.8	99.33	0.69	Bacteria	Bacillota_A	Clostridia	Oscillospirales	Acutalibacteraceae	Clostridium_A	Clostridium_A leptum	278456	3474650	3922.48	1.12888	80.1393	857.365
LC05	Compensated liver cirrhosis	LC05_bin15	72	65123	43.8	43418.5	99.33	3.36	Bacteria	Bacillota_A	Clostridia	Lachnospirales	Lachnospiraceae	Anaerostipes	Anaerostipes hominis	212611	3126134	2994.95	0.958036	68.0108	727.61
LC05	Compensated liver cirrhosis	LC05_bin13	303	6982	54.93	11144	99.32	1.02	Bacteria	Bacillota_A	Clostridia	Oscillospirales	Ruminococcaceae	Gemmiger	Gemmiger qucibialis	3015651	3376635	42480	12.5806	893.094	9554.7
LC05	Compensated liver cirrhosis	LC05_bin14	84	108874	47.15	37922.8	99.29	1.42	Bacteria	Bacillota_A	Clostridia	Peptostreptococcales	Anaerovoracaceae	Hominibacterium	Hominibacterium hominis	683165	3185513	9623.42	3.021	214.46	2294.39
LC05	Compensated liver cirrhosis	LC05_bin39	70	32616	29.09	35638.1	99.06	0	Bacteria	Bacillota_I	Bacilli_A	Erysipelotrichales	Coprobacillaceae	Faecalibacillus	Faecalibacillus intestinalis	1108775	2494664	15618.8	6.26088	444.459	4755.01
LC05	Compensated liver cirrhosis	LC05_bin10	79	92560	50.43	43276.1	99.05	1.27	Bacteria	Bacillota_I	Bacilli_A	Erysipelotrichales	Erysipelotrichaceae	Holdemania	Holdemania filiformis	223876	3418811	3153.63	0.922436	65.4836	700.572
LC05	Compensated liver cirrhosis	LC05_bin6	114	372345	47	32296.3	98.95	1.96	Bacteria	Bacillota_A	Clostridia	Lachnospirales	Lachnospiraceae	Fusicatenibacter	Fusicatenibacter saccharivorans	2239954	3681781	31553.2	8.57008	608.389	6508.81
LC05	Compensated liver cirrhosis	LC05_bin54	18	181384	58.12	118439	98.79	0	Bacteria	Actinomycetota	Coriobacteriia	Coriobacteriales	Eggerthellaceae	Slackia	Slackia sp900553655	176992	2131899	2493.2	1.16947	83.0208	888.193
LC05	Compensated liver cirrhosis	LC05_bin32	58	118963	59.14	47324.4	98.66	0.67	Bacteria	Bacillota_A	Clostridia	Oscillospirales	Acutalibacteraceae	Acutalibacter	Acutalibacter stercoravium	224890	2744813	3167.92	1.15415	81.9327	876.552
LC05	Compensated liver cirrhosis	LC05_bin21	92	186405	41.35	32979.6	98.55	0.06	Bacteria	Bacillota_A	Clostridia	Lachnospirales	Lachnospiraceae	Agathobacter	Agathobacter rectalis	2153219	3034120	30331.4	9.99676	709.668	7592.34
LC05	Compensated liver cirrhosis	LC05_bin42	112	19624	34.92	21246.9	98.49	0.94	Bacteria	Bacillota	Bacilli	Lactobacillales	Streptococcaceae	Lactococcus	Lactococcus lactis	133763	2379656	1884.26	0.791819	56.2111	601.37
LC05	Compensated liver cirrhosis	LC05_bin46	23	290892	62.28	99598.8	98.39	1.08	Bacteria	Actinomycetota	Coriobacteriia	Coriobacteriales	Eggerthellaceae	Slackia	Slackia sp900553775	276175	2290772	3890.35	1.69827	120.56	1289.8
LC05	Compensated liver cirrhosis	LC05_bin51	13	494499	39.58	169446	98.23	0.71	Bacteria	Bacillota_A	Clostridia	Peptostreptococcales	Anaerovoracaceae	Lentihominibacter	Lentihominibacter hominis	235034	2202803	3310.81	1.503	106.698	1141.5
LC05	Compensated liver cirrhosis	LC05_bin57	37	188988	45.2	49065.5	98.1	1.27	Bacteria	Bacillota_C	Negativicutes	Veillonellales	Dialisteraceae	Dialister	Dialister invisus	2839972	1815425	40005.3	22.0363	1564.36	16736.2
LC05	Compensated liver cirrhosis	LC05_bin30	92	98797	51.1	30301.7	97.99	0	Bacteria	Bacillota_A	Clostridia	Oscillospirales	Ruminococcaceae	Ruminococcus_C	Ruminococcus_C sp000980705	319842	2787755	4505.46	1.61616	114.731	1227.44
LC05	Compensated liver cirrhosis	LC05_bin25	73	6980	60.41	39431.4	97.99	0.67	Bacteria	Bacillota_A	Clostridia	Oscillospirales	Oscillospiraceae	Evtepia	Evtepia excrementipullorum	1241485	2878492	17488.2	6.07548	431.297	4614.2
LC05	Compensated liver cirrhosis	LC05_bin41	37	66938	41.82	64384.3	97.99	3.33	Bacteria	Bacillota_A	Clostridia	Lachnospirales	Lachnospiraceae	UBA11774	UBA11774 sp003507655	260578	2382218	3670.64	1.54085	109.385	1170.24
LC05	Compensated liver cirrhosis	LC05_bin5	134	81593	57.06	27764.9	97.96	0	Bacteria	Bacillota_A	Clostridia	Oscillospirales	Ruminococcaceae	Ruthenibacterium	Ruthenibacterium lactatiformans	2593993	3720494	36540.3	9.82137	697.217	7459.13
LC05	Compensated liver cirrhosis	LC05_bin38	64	109359	58.42	39510.4	97.96	0.68	Bacteria	Bacillota_A	Clostridia	Oscillospirales	Ruminococcaceae	Ruthenibacterium	Ruthenibacterium merdipullorum	862709	2528665	12152.6	4.80592	341.172	3650
LC05	Compensated liver cirrhosis	LC05_bin26	33	156858	45.96	86159.7	97.66	4.09	Bacteria	Bacillota_A	Clostridia	Lachnospirales	Lachnospiraceae	Schaedlerella	Schaedlerella glycyrrhizinilytica_A	232339	2843269	3272.85	1.15109	81.7154	874.227
LC05	Compensated liver cirrhosis	LC05_bin20	34	103366	51.51	90239	97.32	1.48	Bacteria	Bacillota_A	Clostridia	Oscillospirales	Acutalibacteraceae	Fimivicinus	Fimivicinus sp900544375	249633	3068126	3516.46	1.14613	81.3633	870.46
LC05	Compensated liver cirrhosis	LC05_bin31	179	7996	44.19	15431.8	96.84	0.73	Bacteria	Bacillota_A	Clostridia	Lachnospirales	Lachnospiraceae	Hominisplanchenecus	Hominisplanchenecus faecis	165984	2762289	2338.14	0.846449	60.0893	642.861
LC05	Compensated liver cirrhosis	LC05_bin52	47	100633	60.57	46710.5	96.77	1.18	Bacteria	Actinomycetota	Coriobacteriia	Coriobacteriales	Coriobacteriaceae	Collinsella	Collinsella tanakaei	254108	2195395	3579.5	1.63046	115.746	1238.3
LC05	Compensated liver cirrhosis	LC05_bin36	38	114810	44.94	70452.6	96.64	0.34	Bacteria	Bacillota_A	Clostridia	Lachnospirales	Anaerotignaceae	Anaerotignum	Anaerotignum sp001304995	283267	2677199	3990.25	1.49046	105.807	1131.97
LC05	Compensated liver cirrhosis	LC05_bin22	71	116492	42.67	42339.7	96.5	0.79	Bacteria	Bacillota_A	Clostridia	Lachnospirales	Lachnospiraceae	Blautia_A	Blautia_A sp900547615	1253176	3006121	17652.9	5.87232	416.875	4459.91
LC05	Compensated liver cirrhosis	LC05_bin24	87	23171	47.98	33995.2	96.48	0	Bacteria	Bacillota_A	Clostridia	Oscillospirales	Acutalibacteraceae	JAHZIE01	JAHZIE01 sp019419895	124980	2957583	1760.53	0.595261	42.2575	452.089
LC05	Compensated liver cirrhosis	LC05_bin33	92	74037	43.18	29779.8	96.17	2.23	Bacteria	Bacillota_A	Clostridia	Lachnospirales	Lachnospiraceae	Blautia_A	Blautia_A sp900066355	270471	2739738	3810	1.39064	98.7215	1056.17
LC05	Compensated liver cirrhosis	LC05_bin43	200	99073	41.86	11783.7	95.79	0.58	Bacteria	Bacillota_A	Clostridia	Lachnospirales	Lachnospiraceae	Mediterraneibacter	Mediterraneibacter torques	116167	2356737	1636.39	0.694345	49.2915	527.341
LC05	Compensated liver cirrhosis	LC05_bin17	91	68187	49.3	33940.3	95.57	0.32	Bacteria	Bacillota_A	Clostridia	Lachnospirales	Lachnospiraceae	Choladousia	Choladousia sp902363135	486028	3088568	6846.45	2.21671	157.364	1683.54
LC05	Compensated liver cirrhosis	LC05_bin55	95	109721	37.21	22062.5	95.19	0	Bacteria	Bacillota_I	Bacilli_A	Erysipelotrichales	Erysipelotrichaceae	Amedibacillus	Amedibacillus dolichus	213081	2095938	3001.57	1.43209	101.664	1087.64
LC05	Compensated liver cirrhosis	LC05_bin11	140	11783	41.88	24205.4	94.8	2.76	Bacteria	Bacillota_A	Clostridia	Lachnospirales	Lachnospiraceae	Blautia_A	Blautia_A obeum	693545	3388753	9769.64	2.88296	204.661	2189.55
LC05	Compensated liver cirrhosis	LC05_bin3	98	341566	59.63	42526.6	94.67	0.59	Bacteria	Desulfobacterota	Desulfovibrionia	Desulfovibrionales	Desulfovibrionaceae	Bilophila	Bilophila wadsworthia	868667	4167608	12236.5	2.9361	208.433	2229.91
LC05	Compensated liver cirrhosis	LC05_bin60	58	40266	62.69	29594.1	94.62	2.41	Bacteria	Actinomycetota	Coriobacteriia	Coriobacteriales	Atopobiaceae	Parolsenella	Parolsenella sp900544655	79263	1716457	1116.54	0.650491	46.1783	494.035
LC05	Compensated liver cirrhosis	LC05_bin58	70	50780	37.17	25257	94.47	2.59	Bacteria	Bacillota_I	Bacilli_A	Erysipelotrichales	Erysipelotrichaceae	Absicoccus	Absicoccus sp000434355	656420	1767989	9246.68	5.23005	371.281	3972.12
LC05	Compensated liver cirrhosis	LC05_bin18	50	111960	48.97	61443.3	94.13	1.21	Bacteria	Bacillota_A	Clostridia	Lachnospirales	Lachnospiraceae	Roseburia	Roseburia hominis	436881	3072165	6154.13	2.00319	142.206	1521.38
LC05	Compensated liver cirrhosis	LC05_bin59	46	63770	62.41	37790.5	94.12	0.07	Bacteria	Actinomycetota	Coriobacteriia	Coriobacteriales	Coriobacteriaceae	Collinsella	Collinsella intestinalis	195141	1738364	2748.86	1.58129	112.256	1200.96
LC05	Compensated liver cirrhosis	LC05_bin34	82	65555	37.2	33215.8	93.96	3.36	Bacteria	Bacillota_A	Clostridia	Lachnospirales	Lachnospiraceae	Anaerostipes	Anaerostipes hadrus	2511315	2723696	35375.7	12.9881	922.025	9864.22
LC05	Compensated liver cirrhosis	LC05_bin8	24	181954	47.33	145021	93.57	0.29	Bacteria	Bacillota_A	Clostridia	Lachnospirales	Lachnospiraceae	Clostridium_AP	Clostridium_AP sp000509125	667497	3480502	9402.71	2.70154	191.782	2051.77
LC05	Compensated liver cirrhosis	LC05_bin35	47	7458	37.86	57603.5	93.29	1.34	Bacteria	Bacillota_A	Clostridia	UBA1381	UBA1381	Hominilimicola	Hominilimicola fabiformis	342920	2707365	4830.55	1.78423	126.662	1355.08
LC05	Compensated liver cirrhosis	LC05_bin23	215	25308	46.88	13967.5	93.12	2.06	Bacteria	Bacillota_A	Clostridia	Lachnospirales	Lachnospiraceae	Acetatifactor	Acetatifactor acetigignens	137267	3003020	1933.61	0.64389	45.7097	489.022
LC05	Compensated liver cirrhosis	LC05_bin44	56	89358	45.07	41272	92.32	0	Bacteria	Bacillota_A	Clostridia	Lachnospirales	Lachnospiraceae	Frisingicoccus	Frisingicoccus sp900753685	131149	2311233	1847.43	0.799328	56.7442	607.074
LC05	Compensated liver cirrhosis	LC05_bin4	302	15904	42.51	13308.3	92.19	0.65	Bacteria	Bacillota_A	Clostridia	Lachnospirales	Lachnospiraceae	Blautia_A	Blautia_A faecis	2108341	4019106	29699.2	7.3895	524.58	5612.18
LC05	Compensated liver cirrhosis	LC05_bin49	45	250474	41.91	49925	91.81	0.19	Bacteria	Bacillota_A	Clostridia	Lachnospirales	Lachnospiraceae	Dorea_D	Dorea_D sp000433535	218812	2246627	3082.3	1.37197	97.3958	1041.98
LC05	Compensated liver cirrhosis	LC05_bin12	67	95749	46.49	50552.4	90.6	0.67	Bacteria	Bacillota_A	Clostridia	Lachnospirales	Lachnospiraceae	Anaerobutyricum	Anaerobutyricum stercoris	1215038	3387008	17115.7	5.05333	358.735	3837.9
LC05	Compensated liver cirrhosis	LC05_bin27	256	6174	45.97	11100.2	89.85	2.74	Bacteria	Bacillota_A	Clostridia	Lachnospirales	Lachnospiraceae	Brotaphodocola	Brotaphodocola sp900538475	122769	2841649	1729.39	0.608586	43.2034	462.209
LC05	Compensated liver cirrhosis	LC05_bin56	63	113514	63.52	31199.2	88.82	1.21	Bacteria	Actinomycetota	Coriobacteriia	Coriobacteriales	Coriobacteriaceae	Collinsella	Collinsella stercoris	292512	1965547	4120.48	2.09635	148.82	1592.14
LC05	Compensated liver cirrhosis	LC05_bin37	271	23530	62.64	9866.16	88.01	0.97	Bacteria	Bacillota_A	Clostridia	Oscillospirales	Oscillospiraceae	Flavonifractor	Flavonifractor plautii	102435	2673729	1442.95	0.539678	38.3117	409.875
LC05	Compensated liver cirrhosis	LC05_bin28	262	28122	43.79	10755.6	87.01	1.9	Bacteria	Bacillota_A	Clostridia	Lachnospirales	Lachnospiraceae	Blautia_A	Blautia_A caecimuris	1622785	2817957	22859.4	8.11205	575.873	6160.94
LC05	Compensated liver cirrhosis	LC05_bin45	75	61779	40.28	30774.1	82.28	3.5	Bacteria	Bacillota_A	Clostridia	Lachnospirales	Lachnospiraceae	Faecalimonas	Faecalimonas sp900556835	1037851	2308060	14619.7	6.3342	449.664	4810.7
LC05	Compensated liver cirrhosis	LC05_bin7	179	25698	57.82	20031.7	76.94	0.31	Bacteria	Pseudomonadota	Gammaproteobacteria	Enterobacterales	Enterobacteriaceae	Klebsiella	Klebsiella pneumoniae	127692	3585669	1798.74	0.501646	35.6118	380.99
LC05	Compensated liver cirrhosis	LC05_bin61	32	114977	26.91	48641.7	76.56	0.56	Bacteria	Bacillota_A	Clostridia	TANB77	CAG-508	CAG-273	CAG-273 sp000438355	1206737	1556533	16998.7	10.9209	775.272	8294.2
LC05	Compensated liver cirrhosis	LC05_bin50	25	208524	57.1	88525.2	70.85	3.73	Bacteria	Verrucomicrobiota	Verrucomicrobiae	Verrucomicrobiales	Akkermansiaceae	Akkermansia	Unclassified_Akkermansia	3571821	2213131	50314.5	22.7346	1613.92	17266.4
LC06	Decompensated liver cirrhosis	LC06_bin56	44	35343	46.83	55460	100	0.8	Bacteria	Bacillota_C	Negativicutes	Acidaminococcales	Acidaminococcaceae	Phascolarctobacterium_A	Phascolarctobacterium_A succinatutens_B	744872	2440239	8884.31	3.64075	305.246	2506.83
LC06	Decompensated liver cirrhosis	LC06_bin62	41	74978	36.81	48650.1	100	1.5	Bacteria	Bacillota	Bacilli	Lactobacillales	Streptococcaceae	Streptococcus	Streptococcus mutans	135111	1994653	1611.51	0.807914	67.7366	556.287
LC06	Decompensated liver cirrhosis	LC06_bin13	88	133342	45.15	50957	99.62	0.13	Bacteria	Bacteroidota	Bacteroidia	Bacteroidales	Tannerellaceae	Parabacteroides	Parabacteroides merdae	1525984	4484217	18200.9	4.05887	340.301	2794.72
LC06	Decompensated liver cirrhosis	LC06_bin24	86	29688	27.88	40980.1	99.19	0.81	Bacteria	Bacillota_A	Clostridia	Clostridiales	Clostridiaceae	Clostridium	Clostridium saudiense	493124	3524289	5881.63	1.66889	139.922	1149.11
LC06	Decompensated liver cirrhosis	LC06_bin64	9	491085	53.17	202182	99.19	0.81	Bacteria	Actinomycetota	Coriobacteriia	Coriobacteriales	Eggerthellaceae	Anaerotardibacter	Anaerotardibacter sp000436075	248718	1819636	2966.53	1.63029	136.686	1122.53
LC06	Decompensated liver cirrhosis	LC06_bin22	152	52801	41.19	23931.1	99.03	2.9	Bacteria	Bacillota_A	Clostridia	Lachnospirales	Lachnospiraceae	Roseburia	Roseburia inulinivorans	906101	3637533	10807.3	2.97106	249.098	2045.72
LC06	Decompensated liver cirrhosis	LC06_bin51	55	159331	48.67	45648.5	98.75	0.73	Bacteria	Pseudomonadota	Gammaproteobacteria	Burkholderiales	Burkholderiaceae	Parasutterella	Parasutterella excrementihominis	591943	2510669	7060.28	2.81211	235.771	1936.27
LC06	Decompensated liver cirrhosis	LC06_bin6	72	272046	46.95	76859.9	98.73	0.32	Bacteria	Bacillota_A	Clostridia	Lachnospirales	Lachnospiraceae	Blautia	Blautia celeris	958016	5533913	11426.5	2.06482	173.117	1421.73
LC06	Decompensated liver cirrhosis	LC06_bin43	33	531222	52.76	83288.5	98.66	0	Bacteria	Bacillota_A	Clostridia	Oscillospirales	Acutalibacteraceae	Hominenteromicrobium	Hominenteromicrobium mulieris	455787	2748520	5436.3	1.9779	165.83	1361.88
LC06	Decompensated liver cirrhosis	LC06_bin44	170	99070	37.86	16131.5	98.66	3.36	Bacteria	Bacillota_A	Clostridia	Oscillospirales	Ruminococcaceae	Porcipelethomonas	Porcipelethomonas ammoniilytica	743862	2742348	8872.26	3.23528	271.25	2227.64
LC06	Decompensated liver cirrhosis	LC06_bin49	209	8615	58.14	12382.3	98.64	1.68	Bacteria	Bacteroidota	Bacteroidia	Bacteroidales	Rikenellaceae	Alistipes_A	Alistipes_A ihumii	79776	2587905	951.512	0.367676	30.8265	253.163
LC06	Decompensated liver cirrhosis	LC06_bin27	35	400746	43.72	93823.8	98.49	3.77	Bacteria	Bacteroidota	Bacteroidia	Bacteroidales	Barnesiellaceae	Barnesiella	Barnesiella intestinihominis	650746	3283833	7761.64	2.36359	198.167	1627.44
LC06	Decompensated liver cirrhosis	LC06_bin14	140	32754	42.46	31766.4	98.39	0	Bacteria	Bacteroidota	Bacteroidia	Bacteroidales	Marinifilaceae	Butyricimonas	Butyricimonas virosa	224703	4447301	2680.1	0.602635	50.5257	414.943
LC06	Decompensated liver cirrhosis	LC06_bin55	27	67300	27.15	90857.8	98.39	0.48	Bacteria	Bacillota_A	Clostridia	Clostridiales	Clostridiaceae	Sarcina	Sarcina ventriculi	766176	2453161	9138.41	3.72516	312.322	2564.95
LC06	Decompensated liver cirrhosis	LC06_bin38	73	129011	42.78	39956	98.25	2.53	Bacteria	Bacillota_A	Clostridia	Lachnospirales	Lachnospiraceae	Ruminococcus_B	Ruminococcus_B gnavus	1002510	2916787	11957.2	4.09945	343.704	2822.67
LC06	Decompensated liver cirrhosis	LC06_bin29	122	63226	42.91	26434.3	98.25	2.66	Bacteria	Bacillota_A	Clostridia	Lachnospirales	Lachnospiraceae	Agathobacter	Agathobacter faecis	758307	3224991	9044.55	2.80452	235.135	1931.04
LC06	Decompensated liver cirrhosis	LC06_bin28	67	165308	31.28	48990.2	98.11	0	Bacteria	Bacillota_I	Bacilli_A	Erysipelotrichales	Coprobacillaceae	Thomasclavelia	Thomasclavelia ramosa	198309	3282341	2365.29	0.720611	60.4169	496.174
LC06	Decompensated liver cirrhosis	LC06_bin20	113	328211	60.8	33165.6	97.99	0.67	Bacteria	Bacillota_A	Clostridia	Oscillospirales	Oscillospiraceae	Flavonifractor	Flavonifractor plautii	488170	3747711	5822.55	1.55363	130.258	1069.75
LC06	Decompensated liver cirrhosis	LC06_bin21	50	363444	48.39	74720	97.77	0.31	Bacteria	Bacteroidota	Bacteroidia	Bacteroidales	Bacteroidaceae	Paraprevotella	Paraprevotella clara	438889	3736000	5234.76	1.40117	117.476	964.769
LC06	Decompensated liver cirrhosis	LC06_bin57	21	86249	58.76	105872	97.7	0.23	Bacteria	Actinomycetota	Actinomycetes	Actinomycetales	Bifidobacteriaceae	Bifidobacterium	Bifidobacterium breve	141189	2223309	1684	0.757431	63.504	521.527
LC06	Decompensated liver cirrhosis	LC06_bin37	70	111645	46.51	43085.2	97.66	0	Bacteria	Bacillota_A	Clostridia	Lachnospirales	Lachnospiraceae	Clostridium_AP	Clostridium_AP scindens	417474	3015961	4979.33	1.65099	138.422	1136.79
LC06	Decompensated liver cirrhosis	LC06_bin34	55	99385	48.77	56246.6	97.58	0.08	Bacteria	Bacillota_A	Clostridia	Lachnospirales	Lachnospiraceae	Otoolea	Otoolea sp000435655	372377	3093562	4441.45	1.43571	120.372	988.552
LC06	Decompensated liver cirrhosis	LC06_bin5	217	267210	48.14	25650.9	97.51	2.29	Bacteria	Bacillota_A	Clostridia	Lachnospirales	Lachnospiraceae	Eisenbergiella	Eisenbergiella porci	590397	5566236	7041.84	1.2651	106.068	871.08
LC06	Decompensated liver cirrhosis	LC06_bin12	235	24070	55.65	19801.3	97.28	2.18	Bacteria	Bacillota_A	Clostridia	Oscillospirales	Ruminococcaceae	Ruthenibacterium	Ruthenibacterium lactatiformans	1681041	4653312	20050.3	4.30882	361.257	2966.82
LC06	Decompensated liver cirrhosis	LC06_bin40	38	256085	63.24	73218.8	96.77	0	Bacteria	Actinomycetota	Coriobacteriia	Coriobacteriales	Eggerthellaceae	Adlercreutzia	Adlercreutzia rubneri	363670	2782316	4337.6	1.55899	130.708	1073.44
LC06	Decompensated liver cirrhosis	LC06_bin39	84	118549	53.64	34635.9	96.64	0	Bacteria	Bacillota_A	Clostridia	Oscillospirales	Acutalibacteraceae	Anaeromassilibacillus	Anaeromassilibacillus stercoravium	304027	2909418	3626.22	1.24637	104.498	858.187
LC06	Decompensated liver cirrhosis	LC06_bin31	96	36473	58.03	33407.6	96.15	0	Bacteria	Bacteroidota	Bacteroidia	Bacteroidales	Rikenellaceae	Alistipes	Alistipes shahii	241950	3207133	2885.81	0.899809	75.4412	619.561
LC06	Decompensated liver cirrhosis	LC06_bin41	114	76991	42.97	24266.5	96.15	3.53	Bacteria	Bacillota_A	Clostridia	Lachnospirales	Lachnospiraceae	Mediterraneibacter	Mediterraneibacter lactaris	1198074	2766386	14289.8	5.1655	433.083	3556.69
LC06	Decompensated liver cirrhosis	LC06_bin54	59	18296	36.21	41689.4	95.64	0.22	Bacteria	Bacillota_A	Clostridia	Lachnospirales	Lachnospiraceae	Lachnospira	Lachnospira pectinoschiza_A	196486	2459674	2343.55	0.952787	79.8829	656.039
LC06	Decompensated liver cirrhosis	LC06_bin32	127	45225	37.88	24920.9	95.3	2.68	Bacteria	Bacillota_A	Clostridia	Lachnospirales	Lachnospiraceae	Anaerobutyricum	Anaerobutyricum soehngenii	1622380	3164959	19350.6	6.11401	512.607	4209.79
LC06	Decompensated liver cirrhosis	LC06_bin59	120	17872	39.28	18442.8	94.94	4.24	Bacteria	Bacillota	Bacilli	Lactobacillales	Streptococcaceae	Streptococcus	Streptococcus sp000187445	787587	2213138	9393.78	4.24455	355.869	2922.58
LC06	Decompensated liver cirrhosis	LC06_bin61	161	29886	53.79	13401.4	94.63	0.89	Bacteria	Bacillota_A	Clostridia	Oscillospirales	Acutalibacteraceae	Fimivicinus	Fimivicinus sp002320555	79738	2157631	951.058	0.440788	36.9563	303.504
LC06	Decompensated liver cirrhosis	LC06_bin53	101	123931	41.01	24706.4	94.44	0	Bacteria	Bacillota_A	Clostridia	Lachnospirales	Lachnospiraceae	Dorea_D	Dorea_D sp900543415	731372	2495343	8723.29	3.49583	293.095	2407.04
LC06	Decompensated liver cirrhosis	LC06_bin19	293	28013	42.58	13187.8	93.99	2.13	Bacteria	Bacillota_A	Clostridia	Lachnospirales	Lachnospiraceae	Blautia_A	Blautia_A faecis	1326557	3864025	15822.2	4.09475	343.31	2819.43
LC06	Decompensated liver cirrhosis	LC06_bin45	115	43053	56.07	23821.4	93.88	0	Bacteria	Bacillota_A	Clostridia	Oscillospirales	Ruminococcaceae	Faecalibacterium	Faecalibacterium prausnitzii_D	2889658	2739465	34465.8	12.5812	1054.83	8662.76
LC06	Decompensated liver cirrhosis	LC06_bin3	242	72247	42.77	25504.4	93.59	4.03	Bacteria	Bacteroidota	Bacteroidia	Bacteroidales	Bacteroidaceae	Bacteroides	Bacteroides thetaiotaomicron	907247	6172059	10821	1.75322	146.993	1207.18
LC06	Decompensated liver cirrhosis	LC06_bin23	77	95661	44.33	46888.9	93.18	0.94	Bacteria	Bacillota_I	Bacilli_A	Erysipelotrichales	Erysipelotrichaceae	Clostridium_AQ	Clostridium_AQ innocuum	244056	3610447	2910.93	0.806251	67.5972	555.142
LC06	Decompensated liver cirrhosis	LC06_bin26	155	93794	48.05	21562	92.91	2.4	Bacteria	Bacillota_A	Clostridia	Lachnospirales	Lachnospiraceae	Gallintestinimicrobium	Gallintestinimicrobium propionicum	2313792	3342105	27597.3	8.25745	692.316	5685.65
LC06	Decompensated liver cirrhosis	LC06_bin33	17	47122	44.28	183727	92.62	3.36	Bacteria	Bacillota_A	Clostridia	Lachnospirales	Lachnospiraceae	Anaerostipes	Anaerostipes caccae	321936	3123366	3839.82	1.22939	103.073	846.491
LC06	Decompensated liver cirrhosis	LC06_bin35	192	84255	59.99	15802.5	92.11	2.07	Bacteria	Bacillota_A	Clostridia	Oscillospirales	Oscillospiraceae	Dysosmobacter	Dysosmobacter welbionis	128516	3034071	1532.85	0.505212	42.3576	347.862
LC06	Decompensated liver cirrhosis	LC06_bin4	452	160153	42.61	12752.1	90.98	3.38	Bacteria	Bacteroidota	Bacteroidia	Bacteroidales	Bacteroidaceae	Phocaeicola	Phocaeicola dorei	6934259	5763946	82706.9	14.349	1203.04	9879.97
LC06	Decompensated liver cirrhosis	LC06_bin46	69	110354	44.59	39343.4	89.24	2.78	Bacteria	Bacillota_A	Clostridia	Lachnospirales	Lachnospiraceae	Oliverpabstia	Oliverpabstia intestinalis	381526	2714697	4550.57	1.67627	140.541	1154.19
LC06	Decompensated liver cirrhosis	LC06_bin60	24	119430	41.82	90041.4	87.97	0.63	Bacteria	Bacillota_A	Clostridia	Lachnospirales	Lachnospiraceae	Faecalimonas	Faecalimonas umbilicata	1233541	2160993	14712.8	6.80835	570.821	4687.87
LC06	Decompensated liver cirrhosis	LC06_bin63	224	3831	66.04	8473.88	83.05	0.52	Bacteria	Actinomycetota	Actinomycetes	Actinomycetales	Actinomycetaceae	Pauljensenia	Pauljensenia sp001838165	54557	1898150	650.717	0.342817	28.7422	236.045
LC06	Decompensated liver cirrhosis	LC06_bin58	32	61846	45.93	69256.7	80.41	0.58	Bacteria	Bacillota_A	Clostridia	Lachnospirales	Lachnospiraceae	Schaedlerella	Schaedlerella glycyrrhizinilytica_A	171632	2216214	2047.11	0.923695	77.4438	636.007
LC06	Decompensated liver cirrhosis	LC06_bin68	404	10472	39.72	4021.28	77.29	1.01	Bacteria	Bacillota_A	Clostridia	Oscillospirales	Acutalibacteraceae	Eubacterium_R	Eubacterium_R sp000436835	88540	1624599	1056.04	0.650033	54.4996	447.578
LC07	Decompensated liver cirrhosis	LC07_bin36	76	57884	55.13	37338.2	100	0.62	Bacteria	Pseudomonadota	Gammaproteobacteria	Burkholderiales	Burkholderiaceae	Sutterella	Sutterella wadsworthensis	489486	2837700	6759.16	2.38191	172.494	1699.79
LC07	Decompensated liver cirrhosis	LC07_bin50	59	134238	38.61	36062.1	100	2.4	Bacteria	Bacillota_C	Negativicutes	Veillonellales	Veillonellaceae	Veillonella	Veillonella parvula_A	667371	2127666	9215.51	4.33128	313.663	3090.9
LC07	Decompensated liver cirrhosis	LC07_bin28	41	556535	60.83	75172.5	99.52	0	Bacteria	Bacteroidota	Bacteroidia	Bacteroidales	Rikenellaceae	Alistipes	Alistipes dispar	603259	3082071	8330.21	2.7028	195.732	1928.78
LC07	Decompensated liver cirrhosis	LC07_bin41	69	341940	53.59	36056.1	99.52	2.88	Bacteria	Bacteroidota	Bacteroidia	Bacteroidales	Rikenellaceae	Alistipes	Alistipes putredinis	2024785	2487872	27959.6	11.2384	813.862	8019.97
LC07	Decompensated liver cirrhosis	LC07_bin13	226	56764	46.1	19008.8	99.52	3.73	Bacteria	Bacillota_A	Clostridia	Lachnospirales	Lachnospiraceae	Acetatifactor	Acetatifactor acetigignens	3046905	4295987	42073.7	9.79373	709.244	6989.04
LC07	Decompensated liver cirrhosis	LC07_bin12	166	9437	42.56	26333.2	99.37	1.27	Bacteria	Bacillota_A	Clostridia	Lachnospirales	Lachnospiraceae	Blautia_A	Blautia_A faecis	1990897	4371314	27491.7	6.28911	455.446	4488.06
LC07	Decompensated liver cirrhosis	LC07_bin18	80	44170	48.13	49553.1	99.26	0.04	Bacteria	Bacteroidota	Bacteroidia	Bacteroidales	Bacteroidaceae	Paraprevotella	Paraprevotella clara	1427935	3964247	19717.9	4.97393	360.203	3549.52
LC07	Decompensated liver cirrhosis	LC07_bin3	136	236175	42.87	44671.6	99.24	3.23	Bacteria	Bacteroidota	Bacteroidia	Bacteroidales	Bacteroidaceae	Bacteroides	Bacteroides thetaiotaomicron	4970877	6075333	68641.3	11.2984	818.207	8062.78
LC07	Decompensated liver cirrhosis	LC07_bin56	26	542413	65.28	70211.5	99.19	0	Bacteria	Actinomycetota	Coriobacteriia	Coriobacteriales	Atopobiaceae	Paratractidigestivibacter	Paratractidigestivibacter faecalis	167258	1825500	2309.61	1.26519	91.6231	902.873
LC07	Decompensated liver cirrhosis	LC07_bin52	19	23715	45.61	107544	99.19	0.12	Bacteria	Actinomycetota	Coriobacteriia	Coriobacteriales	Eggerthellaceae	Anaerotardibacter	Anaerotardibacter sp000435475	127211	2043345	1756.62	0.859677	62.2563	613.486
LC07	Decompensated liver cirrhosis	LC07_bin24	90	106709	47.93	36691.5	98.95	1.58	Bacteria	Bacillota_A	Clostridia	Lachnospirales	Lachnospiraceae	Fusicatenibacter	Fusicatenibacter saccharivorans	921180	3302232	12720.3	3.85203	278.957	2748.9
LC07	Decompensated liver cirrhosis	LC07_bin16	198	10871	44.58	21471.9	98.88	2.48	Bacteria	Bacteroidota	Bacteroidia	Bacteroidales	Bacteroidaceae	Phocaeicola	Phocaeicola plebeius_A	3705568	4251439	51169	12.0357	871.603	8588.96
LC07	Decompensated liver cirrhosis	LC07_bin10	106	169201	42.3	43885.6	98.8	0	Bacteria	Bacteroidota	Bacteroidia	Bacteroidales	Bacteroidaceae	Phocaeicola	Phocaeicola vulgatus	2875700	4651876	39709.6	8.53626	618.181	6091.68
LC07	Decompensated liver cirrhosis	LC07_bin21	121	9578	47.95	28138	98.73	1.58	Bacteria	Bacillota_A	Clostridia	Lachnospirales	Lachnospiraceae	Alitiscatomonas	Alitiscatomonas sp900066535	248117	3404692	3426.17	1.00631	72.875	718.126
LC07	Decompensated liver cirrhosis	LC07_bin26	64	55717	43.02	50168.1	98.66	1.34	Bacteria	Bacillota_A	Clostridia	Lachnospirales	Lachnospiraceae	Coprococcus_A	Coprococcus_A catus	277245	3210755	3828.39	1.19236	86.3488	850.899
LC07	Decompensated liver cirrhosis	LC07_bin9	80	288577	45.13	60265.6	98.62	2.44	Bacteria	Bacteroidota	Bacteroidia	Bacteroidales	Tannerellaceae	Parabacteroides	Parabacteroides distasonis	1046582	4821249	14451.9	2.99755	217.077	2139.12
LC07	Decompensated liver cirrhosis	LC07_bin15	145	92296	59.58	29371.2	98.22	1.18	Bacteria	Desulfobacterota	Desulfovibrionia	Desulfovibrionales	Desulfovibrionaceae	Bilophila	Bilophila wadsworthia	356218	4258826	4918.9	1.15499	83.6423	824.229
LC07	Decompensated liver cirrhosis	LC07_bin48	19	178426	62	115788	98.12	0	Bacteria	Actinomycetota	Actinomycetes	Actinomycetales	Micrococcaceae	Rothia	Rothia mucilaginosa_A	309629	2199976	4275.57	1.94346	140.742	1386.9
LC07	Decompensated liver cirrhosis	LC07_bin20	96	12108	61.13	39096.3	97.65	0.54	Bacteria	Bacillota_A	Clostridia	Oscillospirales	Oscillospiraceae	Flavonifractor	Flavonifractor plautii	295692	3753241	4083.12	1.08789	78.7831	776.345
LC07	Decompensated liver cirrhosis	LC07_bin44	51	68893	59.74	46177.1	97.58	2.73	Bacteria	Actinomycetota	Coriobacteriia	Coriobacteriales	Coriobacteriaceae	Collinsella	Collinsella sp958413765	2676781	2355030	36962.8	15.6953	1136.62	11200.5
LC07	Decompensated liver cirrhosis	LC07_bin11	236	54840	44.92	19667.3	97.56	0.96	Bacteria	Bacteroidota	Bacteroidia	Bacteroidales	Tannerellaceae	Parabacteroides	Parabacteroides merdae	566677	4641483	7825.06	1.6859	122.09	1203.1
LC07	Decompensated liver cirrhosis	LC07_bin59	34	85200	38.74	53081	97.51	1.12	Bacteria	Bacillota	Bacilli	Lactobacillales	Streptococcaceae	Streptococcus	Streptococcus anginosus	663568	1804753	9163	5.07715	367.678	3623.18
LC07	Decompensated liver cirrhosis	LC07_bin29	96	34281	44.17	31756.1	97.01	3.47	Bacteria	Bacillota_A	Clostridia	Lachnospirales	Lachnospiraceae	Anaerostipes	Anaerostipes caccae	278264	3048584	3842.46	1.26041	91.2765	899.457
LC07	Decompensated liver cirrhosis	LC07_bin1	442	34811	43.48	15457.6	97	2.76	Bacteria	Bacteroidota	Bacteroidia	Bacteroidales	Tannerellaceae	Parabacteroides	Parabacteroides goldsteinii	239723	6832280	3310.26	0.484503	35.0868	345.753
LC07	Decompensated liver cirrhosis	LC07_bin5	122	77657	42.9	44227.3	96.98	2.19	Bacteria	Bacteroidota	Bacteroidia	Bacteroidales	Bacteroidaceae	Bacteroides	Bacteroides sp900557355	2962693	5395730	40910.9	7.58208	549.081	5410.76
LC07	Decompensated liver cirrhosis	LC07_bin6	92	27225	40.53	58431.7	96.98	3.41	Bacteria	Bacteroidota	Bacteroidia	Bacteroidales	Bacteroidaceae	Bacteroides	Bacteroides nordii	2016125	5375713	27840	5.17885	375.043	3695.75
LC07	Decompensated liver cirrhosis	LC07_bin60	42	256950	45.5	42532.8	96.84	0.71	Bacteria	Bacillota_C	Negativicutes	Veillonellales	Dialisteraceae	Dialister	Dialister invisus	1661521	1786379	22943.4	12.8435	930.106	9165.45
LC07	Decompensated liver cirrhosis	LC07_bin2	145	111293	41.99	42883.9	96.29	0.93	Bacteria	Bacteroidota	Bacteroidia	Bacteroidales	Bacteroidaceae	Bacteroides	Bacteroides sp948436425	961799	6218160	13281.2	2.13587	154.676	1524.21
LC07	Decompensated liver cirrhosis	LC07_bin55	189	4849	39.47	9777.67	96.26	1.82	Bacteria	Pseudomonadota	Gammaproteobacteria	Enterobacterales	Pasteurellaceae	Haemophilus_D	Haemophilus_D sp927911595	185446	1847979	2560.76	1.38571	100.351	988.877
LC07	Decompensated liver cirrhosis	LC07_bin49	336	8747	50.43	6336.8	96.23	4.06	Bacteria	Pseudomonadota	Gammaproteobacteria	Burkholderiales	Burkholderiaceae	Oxalobacter	Oxalobacter sp905202055	53173	2129164	734.249	0.344853	24.9737	246.096
LC07	Decompensated liver cirrhosis	LC07_bin39	58	61472	41.1	44920	96.2	0.67	Bacteria	Bacillota_A	Clostridia	Lachnospirales	Anaerotignaceae	Metalachnospira	Metalachnospira sp900546215	183182	2605362	2529.5	0.970883	70.3096	692.846
LC07	Decompensated liver cirrhosis	LC07_bin37	65	61822	41.53	41249.9	95.91	3.31	Bacteria	Bacillota_A	Clostridia	Lachnospirales	Lachnospiraceae	Dorea_D	Dorea_D hominis	195686	2681246	2702.17	1.0078	72.9832	719.192
LC07	Decompensated liver cirrhosis	LC07_bin33	77	33749	42.37	38350.1	95.32	0	Bacteria	Bacillota_A	Clostridia	Lachnospirales	Lachnospiraceae	Bariatricus	Bariatricus comes	554757	2952958	7660.46	2.59417	187.865	1851.26
LC07	Decompensated liver cirrhosis	LC07_bin14	271	41519	40.92	15757.3	94.94	3.94	Bacteria	Bacillota_A	Clostridia	Lachnospirales	Lachnospiraceae	Blautia_A	Blautia_A wexlerae	3896304	4270226	53802.8	12.5995	912.435	8991.32
LC07	Decompensated liver cirrhosis	LC07_bin31	106	44591	57.87	28151.1	94.56	0.14	Bacteria	Bacillota_A	Clostridia	Oscillospirales	Ruminococcaceae	Gemmiger	Gemmiger formicilis	443175	2984018	6119.66	2.05081	148.516	1463.51
LC07	Decompensated liver cirrhosis	LC07_bin43	24	216521	58.44	101084	94.55	0.61	Bacteria	Actinomycetota	Actinomycetes	Actinomycetales	Bifidobacteriaceae	Bifidobacterium	Bifidobacterium dentium	798046	2426020	11020	4.5424	328.953	3241.57
LC07	Decompensated liver cirrhosis	LC07_bin17	48	359477	43.33	87432.6	94.09	0	Bacteria	Bacteroidota	Bacteroidia	Bacteroidales	Marinifilaceae	Odoribacter	Odoribacter splanchnicus	373266	4196765	5154.31	1.22816	88.9414	876.447
LC07	Decompensated liver cirrhosis	LC07_bin47	24	172395	60.11	91781.6	94.01	1.84	Bacteria	Actinomycetota	Actinomycetes	Actinomycetales	Bifidobacteriaceae	Bifidobacterium	Bifidobacterium longum	866304	2202759	11962.5	5.4307	393.281	3875.48
LC07	Decompensated liver cirrhosis	LC07_bin30	313	17960	46.25	9687.51	93.6	2.11	Bacteria	Bacillota_A	Clostridia	Lachnospirales	Lachnospiraceae	UBA3402	UBA3402 sp003478355	106289	3032191	1467.71	0.484043	35.0535	345.425
LC07	Decompensated liver cirrhosis	LC07_bin46	68	23843	58.99	33465.9	93.29	0.67	Bacteria	Bacillota_A	Clostridia	Oscillospirales	Oscillospiraceae	Vescimonas	Vescimonas coprocola	103239	2275679	1425.59	0.626448	45.3662	447.048
LC07	Decompensated liver cirrhosis	LC07_bin8	43	327920	57.49	114137	91.67	0.59	Bacteria	Pseudomonadota	Gammaproteobacteria	Enterobacterales	Enterobacteriaceae	Klebsiella	Klebsiella pneumoniae	806507	4907898	11136.8	2.26916	164.328	1619.33
LC07	Decompensated liver cirrhosis	LC07_bin38	73	42467	43	36203.7	91.19	1.75	Bacteria	Bacillota_A	Clostridia	Lachnospirales	Lachnospiraceae	Ruminococcus_B	Ruminococcus_B gnavus	189538	2642872	2617.27	0.990313	71.7167	706.711
LC07	Decompensated liver cirrhosis	LC07_bin58	13	249604	36.64	138898	91.01	0	Bacteria	Bacillota	Bacilli	Lactobacillales	Streptococcaceae	Streptococcus	Streptococcus mutans	144747	1805678	1998.77	1.10693	80.1621	789.934
LC07	Decompensated liver cirrhosis	LC07_bin45	112	24005	45.52	20549.7	90.64	0.63	Bacteria	Bacillota_A	Clostridia	Lachnospirales	Lachnospiraceae	Hominiventricola	Hominiventricola sp003480725	98105	2301567	1354.7	0.588599	42.6253	420.039
LC07	Decompensated liver cirrhosis	LC07_bin25	237	40187	57.92	13587.5	90.28	0	Bacteria	Bacillota_A	Clostridia	Oscillospirales	Ruminococcaceae	Ruthenibacterium	Ruthenibacterium lactatiformans	96564	3220249	1333.42	0.414074	29.9865	295.493
LC07	Decompensated liver cirrhosis	LC07_bin22	46	534472	44.52	72765	89.48	0.1	Bacteria	Bacteroidota	Bacteroidia	Bacteroidales	Bacteroidaceae	Bacteroides	Bacteroides eggerthii	964920	3347191	13324.3	3.98073	288.278	2840.75
LC07	Decompensated liver cirrhosis	LC07_bin62	35	26426	34.87	46719.4	88.08	0	Bacteria	Bacillota	Bacilli	Lactobacillales	Lactobacillaceae	Lactobacillus	Lactobacillus paragasseri	69583	1635179	960.849	0.587611	42.5538	419.333
LC07	Decompensated liver cirrhosis	LC07_bin40	278	12653	55.93	9118.14	85.86	0.67	Bacteria	Bacillota_A	Clostridia	Oscillospirales	Butyricicoccaceae	Butyricicoccus	Butyricicoccus sp900547195	74833	2534843	1033.35	0.407656	29.5217	290.913
LC07	Decompensated liver cirrhosis	LC07_bin42	234	37129	45.14	10466.7	85.15	1.66	Bacteria	Bacillota_A	Clostridia	Lachnospirales	Lachnospiraceae	Lachnoclostridium_B	Lachnoclostridium_B faecipullorum	75404	2449217	1041.23	0.425128	30.787	303.381
LC07	Decompensated liver cirrhosis	LC07_bin51	66	6075	40.14	31481.8	82.59	0	Bacteria	Bacillota_A	Clostridia	Lachnospirales	Lachnospiraceae	Faecalimonas	Faecalimonas sp029983955	175031	2077802	2416.95	1.16322	84.2385	830.104
LC07	Decompensated liver cirrhosis	LC07_bin61	38	132912	41.92	45414.4	76.74	0	Bacteria	Bacillota_A	Clostridia	Lachnospirales	Lachnospiraceae	Blautia_A	Blautia_A obeum	227378	1725746	3139.79	1.81938	131.756	1298.35
LC07	Decompensated liver cirrhosis	LC07_bin27	145	38761	44.16	22085.3	70.18	0	Bacteria	Bacillota_A	Clostridia	Lachnospirales	Lachnospiraceae	Enterocloster	Enterocloster sp000431375	283235	3202369	3911.1	1.22132	88.4455	871.56
LC08	Decompensated liver cirrhosis	LC08_bin119	31	198873	65.15	63422.1	100	0	Bacteria	Actinomycetota	Coriobacteriia	Coriobacteriales	Atopobiaceae	Paratractidigestivibacter	Paratractidigestivibacter faecalis	553600	1966085	4183.35	2.12776	281.575	1113.73
LC08	Decompensated liver cirrhosis	LC08_bin24	65	381607	40.95	57326.9	100	0	Bacteria	Bacteroidota	Bacteroidia	Bacteroidales	Marinifilaceae	Odoribacter	Odoribacter laneus	782610	3726250	5913.89	1.58709	210.026	830.729
LC08	Decompensated liver cirrhosis	LC08_bin67	47	95522	57.61	59063.8	100	0	Bacteria	Bacteroidota	Bacteroidia	Bacteroidales	Rikenellaceae	Alistipes_A	Alistipes_A ihumii	754049	2776000	5698.07	2.05262	271.631	1074.4
LC08	Decompensated liver cirrhosis	LC08_bin113	26	85861	61.55	82166.5	100	0.6	Bacteria	Actinomycetota	Coriobacteriia	Coriobacteriales	Eggerthellaceae	Slackia	Slackia sp959608125	361320	2136330	2730.36	1.27806	169.131	668.975
LC08	Decompensated liver cirrhosis	LC08_bin63	77	109184	55.13	36807.2	100	0.62	Bacteria	Pseudomonadota	Gammaproteobacteria	Burkholderiales	Burkholderiaceae	Sutterella	Sutterella wadsworthensis	195639	2834158	1478.37	0.521626	69.029	273.034
LC08	Decompensated liver cirrhosis	LC08_bin52	49	259832	59.05	60912.6	100	1.08	Bacteria	Bacteroidota	Bacteroidia	Bacteroidales	Rikenellaceae	Alistipes	Alistipes communis	180862	2984715	1366.71	0.457902	60.5961	239.679
LC08	Decompensated liver cirrhosis	LC08_bin112	84	24802	36.62	25653	100	3.4	Bacteria	Bacillota	Bacilli	Lactobacillales	Streptococcaceae	Streptococcus	Streptococcus mutans	615984	2154848	4654.76	2.16013	285.86	1130.68
LC08	Decompensated liver cirrhosis	LC08_bin58	44	260891	54.76	65690.4	100	4.17	Bacteria	Bacteroidota	Bacteroidia	Bacteroidales	Rikenellaceae	Alistipes_A	Alistipes_A indistinctus	431300	2890380	3259.17	1.12759	149.219	590.215
LC08	Decompensated liver cirrhosis	LC08_bin96	31	203957	43.77	77458	99.98	1.5	Bacteria	Bacillota_C	Negativicutes	Acidaminococcales	Acidaminococcaceae	Phascolarctobacterium	Phascolarctobacterium faecium	159363	2401199	1204.25	0.501519	66.3681	262.51
LC08	Decompensated liver cirrhosis	LC08_bin42	20	328884	43.39	157958	99.62	0	Bacteria	Bacteroidota	Bacteroidia	Bacteroidales	Barnesiellaceae	Barnesiella	Barnesiella intestinihominis	625543	3159156	4726.99	1.49628	198.01	783.199
LC08	Decompensated liver cirrhosis	LC08_bin15	90	190952	45.17	46861.8	99.62	0.32	Bacteria	Bacteroidota	Bacteroidia	Bacteroidales	Tannerellaceae	Parabacteroides	Parabacteroides merdae	475022	4217560	3589.56	0.8511	112.63	445.49
LC08	Decompensated liver cirrhosis	LC08_bin118	33	49353	51.81	61777.5	99.6	0	Bacteria	Bacillota_A	Clostridia	Christensenellales	QAND01	UMGS1975	UMGS1975 sp900546685	111780	2038657	844.68	0.414331	54.8302	216.873
LC08	Decompensated liver cirrhosis	LC08_bin41	70	321126	60.56	45727	99.52	3.71	Bacteria	Bacteroidota	Bacteroidia	Bacteroidales	Rikenellaceae	Alistipes	Alistipes dispar	309995	3200892	2342.52	0.731832	96.8464	383.062
LC08	Decompensated liver cirrhosis	LC08_bin23	289	23092	40.83	12919.5	99.52	4.25	Bacteria	Bacillota_A	Clostridia	Lachnospirales	Lachnospiraceae	Agathobacter	Agathobacter rectalis	2529487	3733737	19114.4	5.11937	677.468	2679.63
LC08	Decompensated liver cirrhosis	LC08_bin10	90	299410	44.98	55020.2	99.42	0.02	Bacteria	Bacteroidota	Bacteroidia	Bacteroidales	Tannerellaceae	Parabacteroides	Parabacteroides distasonis	411325	4951822	3108.23	0.627694	83.0654	328.553
LC08	Decompensated liver cirrhosis	LC08_bin87	58	75212	50.53	42941.8	99.4	1.8	Bacteria	Bacillota_C	Negativicutes	Veillonellales	Megasphaeraceae	Megasphaera	Megasphaera massiliensis	872404	2490626	6592.43	2.6469	350.275	1385.46
LC08	Decompensated liver cirrhosis	LC08_bin27	123	9459	44.62	29780.2	99.32	2.7	Bacteria	Bacteroidota	Bacteroidia	Bacteroidales	Bacteroidaceae	Prevotella	Prevotella copri_B	1328488	3662962	10038.9	2.74065	362.681	1434.54
LC08	Decompensated liver cirrhosis	LC08_bin37	102	123530	47.09	32665.3	99.29	1.42	Bacteria	Bacillota_A	Clostridia	Peptostreptococcales	Anaerovoracaceae	Hominibacterium	Hominibacterium hominis	388215	3331861	2933.6	0.880468	116.516	460.863
LC08	Decompensated liver cirrhosis	LC08_bin8	80	164785	43.07	62842.2	99.26	1.14	Bacteria	Bacteroidota	Bacteroidia	Bacteroidales	Bacteroidaceae	Bacteroides	Bacteroides fragilis	443409	5027376	3350.68	0.666486	88.1989	348.858
LC08	Decompensated liver cirrhosis	LC08_bin72	67	119835	42.57	41065.5	98.83	2.34	Bacteria	Bacillota_A	Clostridia	Lachnospirales	Lachnospiraceae	Bariatricus	Bariatricus comes	545966	2751386	4125.66	1.49948	198.433	784.874
LC08	Decompensated liver cirrhosis	LC08_bin127	22	335890	46.35	73533.4	98.73	0	Bacteria	Bacillota_C	Negativicutes	Veillonellales	Dialisteraceae	Allisonella	Allisonella histaminiformans	360704	1617734	2725.71	1.68489	222.969	881.921
LC08	Decompensated liver cirrhosis	LC08_bin71	46	254217	44.24	60042.7	98.66	0	Bacteria	Bacillota_A	Clostridia	Lachnospirales	Lachnospiraceae	Wujia	Wujia chipingensis	411127	2761966	3106.73	1.12483	148.853	588.767
LC08	Decompensated liver cirrhosis	LC08_bin117	31	160738	57.36	65890.1	98.66	1.34	Bacteria	Bacillota_A	Clostridia	Oscillospirales	Oscillospiraceae	Onthomonas	Onthomonas sp003150485	511402	2042592	3864.47	1.89195	250.369	990.3
LC08	Decompensated liver cirrhosis	LC08_bin124	62	47761	39.25	28979.5	98.65	2.1	Bacteria	Bacillota_C	Negativicutes	Acidaminococcales	Acidaminococcaceae	Phascolarctobacterium_A	Phascolarctobacterium_A sp900544885	204761	1796730	1547.3	0.861177	113.963	450.765
LC08	Decompensated liver cirrhosis	LC08_bin20	72	157381	48.17	53379.8	98.51	0	Bacteria	Bacteroidota	Bacteroidia	Bacteroidales	Bacteroidaceae	Paraprevotella	Paraprevotella clara	213373	3843343	1612.38	0.419525	55.5176	219.592
LC08	Decompensated liver cirrhosis	LC08_bin81	73	87080	63.39	35368.3	98.39	1.73	Bacteria	Actinomycetota	Coriobacteriia	Coriobacteriales	Eggerthellaceae	Adlercreutzia	Adlercreutzia rubneri	110247	2581884	833.095	0.32267	42.7002	168.895
LC08	Decompensated liver cirrhosis	LC08_bin95	76	19273	59.12	31614.4	98.28	0.85	Bacteria	Bacillota_A	Clostridia	Oscillospirales	Ruminococcaceae	Faecalibacterium	Faecalibacterium sp900758465	484467	2402691	3660.94	1.52368	201.635	797.54
LC08	Decompensated liver cirrhosis	LC08_bin7	337	30318	42.21	16261.1	98.11	0.96	Bacteria	Bacteroidota	Bacteroidia	Bacteroidales	Bacteroidaceae	Phocaeicola	Phocaeicola sp959599425	2611089	5479982	19731	3.60056	476.478	1884.64
LC08	Decompensated liver cirrhosis	LC08_bin115	36	108281	44.74	57366.9	97.99	1.01	Bacteria	Bacillota_A	Clostridia	Oscillospirales	Acutalibacteraceae	Fimenecus	Fimenecus sp000432435	1153368	2065207	8715.57	4.22019	558.476	2208.97
LC08	Decompensated liver cirrhosis	LC08_bin33	168	50427	59.14	20549.2	97.99	2.68	Bacteria	Bacillota_A	Clostridia	Oscillospirales	Oscillospiraceae	Intestinimonas	Intestinimonas butyriciproducens	131820	3452261	996.115	0.28854	38.1837	151.03
LC08	Decompensated liver cirrhosis	LC08_bin78	65	39834	36.9	41091.2	97.99	2.68	Bacteria	Bacillota_A	Clostridia	Lachnospirales	Lachnospiraceae	Anaerostipes	Anaerostipes hadrus	577991	2670928	4367.66	1.63526	216.401	855.943
LC08	Decompensated liver cirrhosis	LC08_bin99	35	143078	48.23	66532.1	97.87	1.42	Bacteria	Bacillota_A	Clostridia	Peptostreptococcales	Anaerovoracaceae	Lentihominibacter	Lentihominibacter butyrica	104383	2328624	788.783	0.338734	44.826	177.303
LC08	Decompensated liver cirrhosis	LC08_bin39	81	4568	61.96	40548.9	97.65	1.57	Bacteria	Bacillota_A	Clostridia	Oscillospirales	Oscillospiraceae	Vermiculatibacterium	Vermiculatibacterium sp900543935	677288	3284462	5118.01	1.55825	206.21	815.634
LC08	Decompensated liver cirrhosis	LC08_bin80	36	120666	49.55	72745.8	97.6	0.6	Bacteria	Bacillota_C	Negativicutes	Veillonellales	Megasphaeraceae	Caecibacter	Caecibacter sp003467125	574690	2618849	4342.72	1.65825	219.444	867.979
LC08	Decompensated liver cirrhosis	LC08_bin55	107	11330	41.97	27449.4	97.32	0	Bacteria	Bacillota_A	Clostridia	Lachnospirales	Lachnospiraceae	Butyribacter	Butyribacter sp003529475	372608	2937086	2815.66	0.958658	126.863	501.789
LC08	Decompensated liver cirrhosis	LC08_bin106	42	50301	41.64	54026.5	97.22	2.94	Bacteria	Bacillota_A	Clostridia	Lachnospirales	Lachnospiraceae	UBA11774	UBA11774 sp003507655	109767	2269114	829.468	0.365547	48.3744	191.338
LC08	Decompensated liver cirrhosis	LC08_bin3	159	18182	42.89	39945.9	96.98	0.59	Bacteria	Bacteroidota	Bacteroidia	Bacteroidales	Bacteroidaceae	Bacteroides	Bacteroides cellulosilyticus	337354	6351392	2549.26	0.40137	53.115	210.089
LC08	Decompensated liver cirrhosis	LC08_bin74	83	11978	56.76	32545.6	96.98	1.01	Bacteria	Bacillota_A	Clostridia	Oscillospirales	Oscillospiraceae	Dysosmobacter	Dysosmobacter segnis	294319	2701286	2224.06	0.823333	108.955	430.957
LC08	Decompensated liver cirrhosis	LC08_bin68	35	210407	54.79	79242	96.96	0	Bacteria	Bacteroidota	Bacteroidia	Bacteroidales	Rikenellaceae	Alistipes_A	Alistipes_A hominis	118309	2773470	894.017	0.322346	42.6574	168.725
LC08	Decompensated liver cirrhosis	LC08_bin83	56	61596	43.19	45097.3	96.88	3.45	Bacteria	Bacillota_A	Clostridia	Lachnospirales	Lachnospiraceae	Lachnoclostridium_B	Lachnoclostridium_B ammoniilytica	184690	2525450	1395.63	0.552628	73.1315	289.261
LC08	Decompensated liver cirrhosis	LC08_bin17	160	70773	42.37	25005.9	96.79	0.37	Bacteria	Bacteroidota	Bacteroidia	Bacteroidales	Bacteroidaceae	Phocaeicola	Phocaeicola massiliensis	932705	4000950	7048.1	1.76161	233.121	922.077
LC08	Decompensated liver cirrhosis	LC08_bin4	115	194207	55.79	53185	96.77	1.9	Bacteria	Bacillota_A	Clostridia	Lachnospirales	Lachnospiraceae	Enterocloster	Enterocloster asparagiformis	1312123	6116280	9915.22	1.62112	214.53	848.542
LC08	Decompensated liver cirrhosis	LC08_bin53	67	63845	49.19	43887	96.54	0.48	Bacteria	Bacillota_A	Clostridia	Lachnospirales	Lachnospiraceae	Roseburia	Roseburia hominis	211811	2940426	1600.58	0.544335	72.0341	284.921
LC08	Decompensated liver cirrhosis	LC08_bin82	77	18628	54.59	33328.1	96.46	0.67	Bacteria	Bacillota_A	Clostridia	Oscillospirales	Butyricicoccaceae	Agathobaculum	Agathobaculum butyriciproducens	177570	2566261	1341.83	0.522874	69.1941	273.687
LC08	Decompensated liver cirrhosis	LC08_bin125	36	253616	62.74	49357.4	96.24	0	Bacteria	Actinomycetota	Coriobacteriia	Coriobacteriales	Atopobiaceae	Parolsenella	Parolsenella sp900544655	123672	1776868	934.543	0.52595	69.6011	275.297
LC08	Decompensated liver cirrhosis	LC08_bin5	105	353458	42.67	55859.5	96.13	2.04	Bacteria	Bacteroidota	Bacteroidia	Bacteroidales	Bacteroidaceae	Bacteroides	Bacteroides thetaiotaomicron	481065	5865251	3635.23	0.619791	82.0195	324.417
LC08	Decompensated liver cirrhosis	LC08_bin110	36	112448	47	61338.4	96.1	0.71	Bacteria	Bacillota_A	Clostridia	Peptostreptococcales	Anaerovoracaceae	Lentihominibacter	Lentihominibacter faecis	113662	2208183	858.901	0.388963	51.4731	203.595
LC08	Decompensated liver cirrhosis	LC08_bin21	110	9224	45.94	34390.8	96.02	0.77	Bacteria	Bacteroidota	Bacteroidia	Bacteroidales	Bacteroidaceae	Bacteroides	Bacteroides stercoris	307119	3782994	2320.78	0.613478	81.1841	321.112
LC08	Decompensated liver cirrhosis	LC08_bin77	211	97283	51.54	12700.4	95.97	0.78	Bacteria	Bacillota_A	Clostridia	Oscillospirales	Ruminococcaceae	Ruminococcus_C	Ruminococcus_C sp000437175	103904	2679784	785.164	0.292995	38.7733	153.362
LC08	Decompensated liver cirrhosis	LC08_bin101	45	195348	60.3	51577.3	95.97	1.01	Bacteria	Bacillota_A	Clostridia	Oscillospirales	Oscillospiraceae	CAG-103	CAG-103 sp900543625	1053348	2320979	7959.76	3.42948	453.838	1795.09
LC08	Decompensated liver cirrhosis	LC08_bin98	94	12150	46.74	25046.8	95.92	0.36	Bacteria	Bacillota	Bacilli	Lactobacillales	Lactobacillaceae	Lacticaseibacillus	Lacticaseibacillus paracasei	178470	2354395	1348.63	0.572814	75.8029	299.828
LC08	Decompensated liver cirrhosis	LC08_bin66	98	56642	29.93	28516	95.75	1.89	Bacteria	Bacillota_I	Bacilli_A	Erysipelotrichales	Coprobacillaceae	Faecalibacillus	Faecalibacillus intestinalis	1384558	2794572	10462.6	3.7439	495.445	1959.66
LC08	Decompensated liver cirrhosis	LC08_bin14	103	172128	41.98	42844.2	95.58	0.46	Bacteria	Bacteroidota	Bacteroidia	Bacteroidales	Bacteroidaceae	Bacteroides	Bacteroides caccae	368806	4412947	2786.93	0.631535	83.5736	330.564
LC08	Decompensated liver cirrhosis	LC08_bin84	83	238855	41.09	30243.4	95.32	1.85	Bacteria	Bacillota_A	Clostridia	Lachnospirales	Lachnospiraceae	Dorea_D	Dorea_D sp900543415	479031	2510203	3619.86	1.44206	190.834	754.815
LC08	Decompensated liver cirrhosis	LC08_bin69	111	114580	58.16	24978.8	95.25	4.94	Bacteria	Actinomycetota	Actinomycetes	Actinomycetales	Bifidobacteriaceae	Bifidobacterium	Bifidobacterium dentium	311125	2772644	2351.06	0.847947	112.212	443.84
LC08	Decompensated liver cirrhosis	LC08_bin25	145	52937	40.82	25297	95.17	0.95	Bacteria	Bacillota_A	Clostridia	Lachnospirales	Lachnospiraceae	Anthropogastromicrobium	Anthropogastromicrobium aceti	164119	3668059	1240.19	0.338104	44.7427	176.974
LC08	Decompensated liver cirrhosis	LC08_bin22	220	86841	59.74	17175.2	94.95	0	Bacteria	Desulfobacterota	Desulfovibrionia	Desulfovibrionales	Desulfovibrionaceae	Bilophila	Bilophila wadsworthia	164389	3778555	1242.23	0.328757	43.5058	172.081
LC08	Decompensated liver cirrhosis	LC08_bin93	58	99828	41.83	41950.8	94.94	0.76	Bacteria	Bacillota_A	Clostridia	Lachnospirales	Lachnospiraceae	Faecalimonas	Faecalimonas umbilicata	606351	2433144	4581.97	1.88315	249.205	985.694
LC08	Decompensated liver cirrhosis	LC08_bin109	53	126257	51.56	42513.6	94.63	1.34	Bacteria	Bacillota_A	Clostridia	Oscillospirales	Ruminococcaceae	Negativibacillus	Negativibacillus sp000435195	746364	2253218	5639.99	2.50308	331.244	1310.19
LC08	Decompensated liver cirrhosis	LC08_bin79	171	40514	59.37	15465.1	94.56	0.23	Bacteria	Bacillota_A	Clostridia	Oscillospirales	Ruminococcaceae	Ruthenibacterium	Ruthenibacterium lactatiformans	88732	2644525	670.515	0.253548	33.5531	132.715
LC08	Decompensated liver cirrhosis	LC08_bin120	80	193540	58	24442.8	94.35	1.69	Bacteria	Actinomycetota	Coriobacteriia	Coriobacteriales	Coriobacteriaceae	Collinsella	Collinsella bouchesdurhonensis	383488	1955423	2897.88	1.48197	196.115	775.706
LC08	Decompensated liver cirrhosis	LC08_bin76	88	241361	44.38	30452.5	94.3	0.06	Bacteria	Bacillota_A	Clostridia	Lachnospirales	Lachnospiraceae	Hominisplanchenecus	Hominisplanchenecus faecis	203046	2679821	1534.34	0.572554	75.7685	299.692
LC08	Decompensated liver cirrhosis	LC08_bin64	97	81082	52.7	29208.7	94.2	3.36	Bacteria	Bacillota_A	Clostridia	Oscillospirales	Acutalibacteraceae	Hominenteromicrobium	Hominenteromicrobium mulieris	900659	2833246	6805.94	2.40217	317.889	1257.37
LC08	Decompensated liver cirrhosis	LC08_bin45	94	98897	42.85	33399.7	94.15	0.29	Bacteria	Bacillota_A	Clostridia	Lachnospirales	Lachnospiraceae	Ruminococcus_B	Ruminococcus_B gnavus	677833	3139571	5122.13	1.63147	215.9	853.962
LC08	Decompensated liver cirrhosis	LC08_bin97	56	124522	58.59	42751.6	93.96	1.68	Bacteria	Bacillota_A	Clostridia	Oscillospirales	Oscillospiraceae	Evtepia	Evtepia gabavorous	440516	2394088	3328.81	1.39043	184.002	727.792
LC08	Decompensated liver cirrhosis	LC08_bin48	117	28413	59.79	26354.2	93.96	2.01	Bacteria	Bacillota_A	Clostridia	Oscillospirales	Oscillospiraceae	Dysosmobacter	Dysosmobacter welbionis	410358	3083436	3100.92	1.00567	133.085	526.398
LC08	Decompensated liver cirrhosis	LC08_bin107	83	61397	60.25	27325.8	93.95	1.41	Bacteria	Actinomycetota	Coriobacteriia	Coriobacteriales	Eggerthellaceae	Ellagibacter	Ellagibacter isourolithinifaciens	79032	2268044	597.215	0.263317	34.8459	137.828
LC08	Decompensated liver cirrhosis	LC08_bin28	164	165681	62.3	22014.8	93.23	1.23	Bacteria	Desulfobacterota	Desulfovibrionia	Desulfovibrionales	Desulfovibrionaceae	Bilophila	Bilophila sp902373525	563207	3610429	4255.94	1.17879	155.994	617.014
LC08	Decompensated liver cirrhosis	LC08_bin70	199	6911	55.49	13910.9	92.97	1.36	Bacteria	Bacillota_A	Clostridia	Oscillospirales	Ruminococcaceae	Gemmiger	Gemmiger qucibialis	313855	2768274	2371.69	0.856738	113.376	448.442
LC08	Decompensated liver cirrhosis	LC08_bin16	105	28793	65.24	39866.9	92.34	4.03	Bacteria	Actinomycetota	Coriobacteriia	Coriobacteriales	UMGS124	JAHZGC01	JAHZGC01 sp019421015	184330	4186024	1392.91	0.332753	44.0346	174.173
LC08	Decompensated liver cirrhosis	LC08_bin94	43	59934	37.66	56152.8	91.95	0	Bacteria	Bacillota_A	Clostridia	Lachnospirales	Lachnospiraceae	Lachnospira	Lachnospira eligens_A	183544	2414569	1386.97	0.574419	76.0152	300.668
LC08	Decompensated liver cirrhosis	LC08_bin126	60	10531	58.81	27380.2	91.52	0	Bacteria	Actinomycetota	Actinomycetes	Actinomycetales	Bifidobacteriaceae	Scardovia	Scardovia denticolens	62177	1642811	469.848	0.286003	37.8479	149.702
LC08	Decompensated liver cirrhosis	LC08_bin50	92	29436	43.11	32834.4	90.64	3.16	Bacteria	Bacillota_A	Clostridia	Lachnospirales	Lachnospiraceae	Blautia_A	Blautia_A ammoniilytica	251103	3020766	1897.49	0.628149	83.1256	328.792
LC08	Decompensated liver cirrhosis	LC08_bin60	57	279839	43.23	50460.9	90.6	1.34	Bacteria	Bacillota_A	Clostridia	Lachnospirales	Lachnospiraceae	Coprococcus_A	Coprococcus_A catus	246337	2876270	1861.48	0.647184	85.6446	338.755
LC08	Decompensated liver cirrhosis	LC08_bin103	27	88501	52.44	85741.9	90.21	1.63	Bacteria	Bacillota_A	Clostridia	Christensenellales	Christensenellaceae	Guopingia	Guopingia tenuis	122932	2315032	928.951	0.401269	53.1016	210.036
LC08	Decompensated liver cirrhosis	LC08_bin13	40	259635	57.19	116162	90.12	1.04	Bacteria	Pseudomonadota	Gammaproteobacteria	Enterobacterales	Enterobacteriaceae	Klebsiella	Klebsiella pneumoniae	2948911	4646493	22283.8	4.79584	634.653	2510.28
LC08	Decompensated liver cirrhosis	LC08_bin49	151	130277	41.87	20407.6	89.84	1.61	Bacteria	Bacillota_A	Clostridia	Lachnospirales	Lachnospiraceae	Roseburia	Roseburia inulinivorans	125625	3081554	949.301	0.308059	40.7668	161.247
LC08	Decompensated liver cirrhosis	LC08_bin102	45	164433	41.73	51515.8	89.47	0.19	Bacteria	Bacillota_A	Clostridia	Lachnospirales	Lachnospiraceae	Dorea_D	Dorea_D hominis	155773	2318210	1177.12	0.50777	67.1954	265.782
LC08	Decompensated liver cirrhosis	LC08_bin43	238	13829	41.5	13222.7	89.47	4.78	Bacteria	Bacillota_A	Clostridia	Lachnospirales	Lachnospiraceae	Blautia_A	Blautia_A obeum	1067727	3146995	8068.41	2.56385	339.285	1341.99
LC08	Decompensated liver cirrhosis	LC08_bin65	300	6169	42.34	9432.11	88.75	2.01	Bacteria	Bacillota_A	Clostridia	Lachnospirales	Lachnospiraceae	Blautia_A	Blautia_A difficilis	1443444	2829634	10907.6	3.85476	510.117	2017.7
LC08	Decompensated liver cirrhosis	LC08_bin62	93	88728	58.97	30615.5	88.33	2.08	Bacteria	Bacteroidota	Bacteroidia	Bacteroidales	Rikenellaceae	Alistipes	Alistipes shahii	287927	2847242	2175.76	0.764163	101.125	399.985
LC08	Decompensated liver cirrhosis	LC08_bin47	216	15832	42.87	14278.3	87.86	0.63	Bacteria	Bacillota_A	Clostridia	Lachnospirales	Lachnospiraceae	Enterocloster	Enterocloster sp900541315	971253	3084106	7339.4	2.37975	314.922	1245.63
LC08	Decompensated liver cirrhosis	LC08_bin59	172	5201	57.96	16723.3	84.26	1.04	Bacteria	Bacteroidota	Bacteroidia	Bacteroidales	Rikenellaceae	Alistipes	Alistipes onderdonkii	409894	2876400	3097.42	1.07684	142.502	563.648
LC08	Decompensated liver cirrhosis	LC08_bin114	54	37187	61.02	38662.9	84.23	0	Bacteria	Bacillota_A	Clostridia	Oscillospirales	Oscillospiraceae	Faecousia	Faecousia sp003525905	95532	2087796	721.9	0.345771	45.7573	180.987
LC08	Decompensated liver cirrhosis	LC08_bin111	241	11680	59.69	9095.2	82.22	3.26	Bacteria	Actinomycetota	Actinomycetes	Actinomycetales	Bifidobacteriaceae	Bifidobacterium	Bifidobacterium longum	592591	2191943	4477.99	2.04293	270.35	1069.33
LC08	Decompensated liver cirrhosis	LC08_bin130	56	58949	53.05	23108.3	81.69	0.18	Bacteria	Bacillota	Bacilli	Lactobacillales	Lactobacillaceae	Limosilactobacillus	Limosilactobacillus fermentum	45435	1294065	343.335	0.265315	35.1103	138.874
LC08	Decompensated liver cirrhosis	LC08_bin122	257	5389	65.46	7238.3	81.6	2.99	Bacteria	Actinomycetota	Actinomycetes	Actinomycetales	Actinomycetaceae	Pauljensenia	Pauljensenia variabilis	85074	1860242	642.872	0.345585	45.7328	180.889
LC08	Decompensated liver cirrhosis	LC08_bin89	48	26544	45.11	51390.2	81.21	0	Bacteria	Bacillota_A	Clostridia	Lachnospirales	Anaerotignaceae	Anaerotignum	Anaerotignum sp001304995	442864	2466729	3346.56	1.35668	179.535	710.125
LC08	Decompensated liver cirrhosis	LC08_bin35	362	4089	44.43	9374.58	80.85	1.26	Bacteria	Bacillota_I	Bacilli_A	Erysipelotrichales	Erysipelotrichaceae	Clostridium_AQ	Clostridium_AQ sp003481775	89790	3393597	678.51	0.199938	26.4587	104.653
LC08	Decompensated liver cirrhosis	LC08_bin91	391	9536	68.87	6279.42	77.47	2.65	Bacteria	Actinomycetota	Actinomycetes	Actinomycetales	Actinomycetaceae	Actinomyces	Actinomyces oris_A	136513	2455253	1031.58	0.420151	55.6004	219.919
LC08	Decompensated liver cirrhosis	LC08_bin104	567	20776	49.77	4073.71	73.52	3.16	Bacteria	Bacillota_A	Clostridia	Lachnospirales	Lachnospiraceae	Choladousia	Choladousia sp902363135	62826	2309791	474.753	0.205539	27.1999	107.585
LC09	Decompensated liver cirrhosis	LC09_bin13	131	40702	59.72	31142.2	100	0	Bacteria	Desulfobacterota	Desulfovibrionia	Desulfovibrionales	Desulfovibrionaceae	Bilophila	Bilophila wadsworthia	2329754	4079635	18676.6	4.578	571.069	3616.67
LC09	Decompensated liver cirrhosis	LC09_bin19	76	135901	58.61	46501.4	100	0	Bacteria	Bacteroidota	Bacteroidia	Bacteroidales	Rikenellaceae	Alistipes	Alistipes shahii	728691	3534104	5841.58	1.65292	206.188	1305.82
LC09	Decompensated liver cirrhosis	LC09_bin52	18	539709	56.17	124289	100	0.91	Bacteria	Actinomycetota	Actinomycetes	Actinomycetales	Bifidobacteriaceae	Bifidobacterium	Bifidobacterium pseudocatenulatum	2722196	2237199	21822.6	9.75443	1216.79	7706.1
LC09	Decompensated liver cirrhosis	LC09_bin38	51	8541	55.09	56143.4	100	1.24	Bacteria	Pseudomonadota	Gammaproteobacteria	Burkholderiales	Burkholderiaceae	Sutterella	Sutterella wadsworthensis	925820	2863313	7421.87	2.59206	323.339	2047.75
LC09	Decompensated liver cirrhosis	LC09_bin23	163	155667	38.2	20747	100	1.34	Bacteria	Bacillota_A	Clostridia	Lachnospirales	Lachnospiraceae	Anaerobutyricum	Anaerobutyricum soehngenii	3584220	3381756	28733	8.49649	1059.87	6712.31
LC09	Decompensated liver cirrhosis	LC09_bin54	76	33145	59.81	28848.5	100	1.61	Bacteria	Actinomycetota	Coriobacteriia	Coriobacteriales	Coriobacteriaceae	Collinsella	Unclassified_Collinsella	1516380	2192483	12156.1	5.54445	691.627	4380.18
LC09	Decompensated liver cirrhosis	LC09_bin49	62	25287	60.25	39975.2	100	4.29	Bacteria	Actinomycetota	Actinomycetes	Actinomycetales	Bifidobacteriaceae	Bifidobacterium	Bifidobacterium longum	671309	2478459	5381.58	2.17134	270.857	1715.38
LC09	Decompensated liver cirrhosis	LC09_bin58	15	224688	39.34	131208	99.89	0.11	Bacteria	Pseudomonadota	Gammaproteobacteria	Enterobacterales	Pasteurellaceae	Haemophilus_D	Haemophilus_D parainfluenzae_K	120616	1968118	966.923	0.491293	61.2849	388.127
LC09	Decompensated liver cirrhosis	LC09_bin37	129	103763	42.48	22307.4	99.42	0	Bacteria	Bacillota_A	Clostridia	Lachnospirales	Lachnospiraceae	Mediterraneibacter	Mediterraneibacter torques	2367096	2877652	18975.9	6.59424	822.579	5209.52
LC09	Decompensated liver cirrhosis	LC09_bin9	83	90537	45	59249	99.42	0.9	Bacteria	Bacteroidota	Bacteroidia	Bacteroidales	Tannerellaceae	Parabacteroides	Parabacteroides distasonis	2670151	4917665	21405.4	4.35275	542.971	3438.72
LC09	Decompensated liver cirrhosis	LC09_bin22	136	67118	37.49	25013	99.33	2.68	Bacteria	Bacillota_A	Clostridia	Lachnospirales	Lachnospiraceae	Anaerostipes	Anaerostipes hadrus	4263725	3401763	34180.3	10.0478	1253.39	7937.89
LC09	Decompensated liver cirrhosis	LC09_bin29	142	90825	64.34	22856.1	99.19	1.61	Bacteria	Actinomycetota	Coriobacteriia	Coriobacteriales	Eggerthellaceae	Eggerthella	Eggerthella lenta	259344	3245572	2079.04	0.640578	79.907	506.063
LC09	Decompensated liver cirrhosis	LC09_bin44	86	95924	30.26	29670.1	99.06	0.94	Bacteria	Bacillota_I	Bacilli_A	Erysipelotrichales	Coprobacillaceae	Faecalibacillus	Faecalibacillus faecis	1864119	2551626	14943.8	5.85657	730.561	4626.75
LC09	Decompensated liver cirrhosis	LC09_bin32	49	22795	45.12	63247.6	98.83	0.88	Bacteria	Bacillota_A	Clostridia	Lachnospirales	Lachnospiraceae	Sellimonas	Sellimonas intestinalis	404626	3099134	3243.7	1.04665	130.561	826.863
LC09	Decompensated liver cirrhosis	LC09_bin30	71	98925	49.91	44338.4	98.66	0.67	Bacteria	Bacillota_A	Clostridia	Oscillospirales	Acutalibacteraceae	Clostridium_A	Clostridium_A leptum	668202	3148024	5356.67	1.7016	212.261	1344.28
LC09	Decompensated liver cirrhosis	LC09_bin1	106	116530	46.67	73189.9	98.44	3.26	Bacteria	Bacillota_A	Clostridia	Lachnospirales	Lachnospiraceae	Eisenbergiella	Eisenbergiella tayi	1244748	7758131	9978.57	1.28621	160.444	1016.12
LC09	Decompensated liver cirrhosis	LC09_bin33	51	100087	47.63	59373.8	98.25	2.34	Bacteria	Bacillota_A	Clostridia	Lachnospirales	Lachnospiraceae	Merdimonas	Merdimonas faecis	290895	3028063	2331.97	0.77012	96.0664	608.403
LC09	Decompensated liver cirrhosis	LC09_bin53	223	539210	45.92	9925.39	97.78	2.74	Bacteria	Bacillota_C	Negativicutes	Veillonellales	Dialisteraceae	Dialister	Dialister invisus	3037239	2213363	24348.1	11.0005	1372.23	8690.53
LC09	Decompensated liver cirrhosis	LC09_bin31	62	266121	46.74	50495.7	97.66	2.63	Bacteria	Bacillota_A	Clostridia	Lachnospirales	Lachnospiraceae	Clostridium_AP	Clostridium_AP scindens	1271566	3130732	10193.6	3.25597	406.156	2572.25
LC09	Decompensated liver cirrhosis	LC09_bin36	49	77735	59.63	58839.5	97.01	0	Bacteria	Bacillota_A	Clostridia	Oscillospirales	Ruminococcaceae	Gemmiger	Gemmiger sp905214345	178253	2883134	1428.97	0.495632	61.8261	391.554
LC09	Decompensated liver cirrhosis	LC09_bin47	60	423746	57.91	41590.5	96.98	2.18	Bacteria	Bacillota_A	Clostridia	Oscillospirales	Oscillospiraceae	Evtepia	Evtepia gabavorous	1022670	2495428	8198.27	3.28532	409.817	2595.44
LC09	Decompensated liver cirrhosis	LC09_bin18	111	104315	41.37	32101.2	96.84	0.95	Bacteria	Bacillota_A	Clostridia	Lachnospirales	Lachnospiraceae	Blautia_A	Blautia_A sp934364795	2006152	3563236	16082.4	4.51342	563.014	3565.65
LC09	Decompensated liver cirrhosis	LC09_bin25	97	51617	41.69	34576.2	96.84	1.9	Bacteria	Bacillota_A	Clostridia	Lachnospirales	Lachnospiraceae	Blautia_A	Blautia_A obeum	3576717	3353888	28672.9	8.54915	1066.44	6753.92
LC09	Decompensated liver cirrhosis	LC09_bin4	120	328708	42.91	49315.9	96	1.38	Bacteria	Bacteroidota	Bacteroidia	Bacteroidales	Bacteroidaceae	Bacteroides	Bacteroides thetaiotaomicron	1373000	5917911	11006.7	1.8599	232.008	1469.34
LC09	Decompensated liver cirrhosis	LC09_bin35	99	89247	59.75	29782.3	95.97	0.67	Bacteria	Bacillota_A	Clostridia	Oscillospirales	Acutalibacteraceae	Acutalibacter	Acutalibacter ornithocaccae	389910	2948445	3125.73	1.06013	132.243	837.512
LC09	Decompensated liver cirrhosis	LC09_bin45	88	337593	53.49	28738.8	95.67	0.72	Bacteria	Bacteroidota	Bacteroidia	Bacteroidales	Rikenellaceae	Alistipes	Alistipes putredinis	1443954	2529019	11575.5	4.57708	570.954	3615.94
LC09	Decompensated liver cirrhosis	LC09_bin26	344	35964	54.5	9734.74	95.24	3.54	Bacteria	Bacillota_A	Clostridia	Oscillospirales	Ruminococcaceae	Gemmiger	Gemmiger qucibialis	2059475	3348750	16509.9	4.93016	614.998	3894.88
LC09	Decompensated liver cirrhosis	LC09_bin42	160	76990	45.55	17199.2	94.63	0	Bacteria	Bacillota_A	Clostridia	Lachnospirales	Anaerotignaceae	Anaerotignum	Anaerotignum lactatifermentans	311132	2751878	2494.2	0.906364	113.062	716.037
LC09	Decompensated liver cirrhosis	LC09_bin39	64	128651	38.07	44709.8	94.63	1.01	Bacteria	Bacillota_A	Clostridia	UBA1381	UBA1381	Hominilimicola	Hominilimicola fabiformis	1558551	2861430	12494.2	4.36641	544.676	3449.51
LC09	Decompensated liver cirrhosis	LC09_bin41	41	96415	58.42	68403.2	94.54	0.14	Bacteria	Bacillota_A	Clostridia	Oscillospirales	Ruminococcaceae	Gemmiger	Unclassified_Gemmiger	359808	2804531	2884.42	1.02848	128.295	812.513
LC09	Decompensated liver cirrhosis	LC09_bin57	170	35079	49.48	11956.4	94.38	0.62	Bacteria	Pseudomonadota	Gammaproteobacteria	Burkholderiales	Burkholderiaceae	Parasutterella	Parasutterella gallistercoris	74175	2032591	594.627	0.292546	36.4928	231.115
LC09	Decompensated liver cirrhosis	LC09_bin3	648	44345	42.28	10338.2	94.23	2.95	Bacteria	Bacteroidota	Bacteroidia	Bacteroidales	Bacteroidaceae	Bacteroides	Bacteroides sp902362375	5013324	6699152	40189.5	5.99919	748.352	4739.43
LC09	Decompensated liver cirrhosis	LC09_bin56	183	30059	35.29	11574.5	94.06	2.64	Bacteria	Bacillota	Bacilli	Lactobacillales	Streptococcaceae	Lactococcus	Lactococcus lactis	92394	2118135	740.68	0.349685	43.6204	276.255
LC09	Decompensated liver cirrhosis	LC09_bin7	356	13567	46.33	15368.3	93.99	0.53	Bacteria	Bacillota_A	Clostridia	Lachnospirales	Lachnospiraceae	Blautia	Blautia coccoides	329811	5471119	2643.94	0.483255	60.2822	381.776
LC09	Decompensated liver cirrhosis	LC09_bin60	132	22657	59.02	14517.9	93.41	0	Bacteria	Bacillota_A	Clostridia	Oscillospirales	Oscillospiraceae	Hominicoprocola	Hominicoprocola fusiformis	69564	1916366	557.663	0.291	36.3	229.893
LC09	Decompensated liver cirrhosis	LC09_bin43	80	148838	48.65	32926.5	93.35	3.8	Bacteria	Bacillota_A	Clostridia	Lachnospirales	Lachnospiraceae	Otoolea	Otoolea fessa	985370	2634121	7899.26	2.99882	374.079	2369.1
LC09	Decompensated liver cirrhosis	LC09_bin6	94	257469	42.67	59023.8	93.33	2.97	Bacteria	Bacteroidota	Bacteroidia	Bacteroidales	Bacteroidaceae	Bacteroides	Bacteroides intestinalis	6994906	5548236	56074.9	10.1068	1260.74	7984.48
LC09	Decompensated liver cirrhosis	LC09_bin46	64	35355	58.68	39311.3	93.29	2.14	Bacteria	Bacillota_A	Clostridia	Oscillospirales	Oscillospiraceae	Vescimonas	Vescimonas coprocola	252058	2515926	2020.63	0.803137	100.185	634.487
LC09	Decompensated liver cirrhosis	LC09_bin48	73	97685	57.03	34022.1	93.01	2.89	Bacteria	Bacillota_A	Clostridia	Oscillospirales	Ruminococcaceae	Gemmiger	Gemmiger sp900556255	1149585	2483614	9215.69	3.7106	462.868	2931.41
LC09	Decompensated liver cirrhosis	LC09_bin50	46	166288	51.17	48756.2	92.58	0	Bacteria	Bacillota_A	Clostridia	Oscillospirales	Acutalibacteraceae	CAG-177	CAG-177 sp003514385	205311	2242787	1645.88	0.733856	91.5428	579.754
LC09	Decompensated liver cirrhosis	LC09_bin34	158	422151	42.92	18697.9	92.28	1.49	Bacteria	Bacillota_A	Clostridia	Lachnospirales	Lachnospiraceae	Ruminococcus_B	Ruminococcus_B gnavus	579789	2954269	4647.9	1.57328	196.255	1242.91
LC09	Decompensated liver cirrhosis	LC09_bin11	104	119189	43.27	44528	91.59	0	Bacteria	Bacteroidota	Bacteroidia	Bacteroidales	Bacteroidaceae	Bacteroides	Bacteroides fragilis	649394	4630913	5205.89	1.12416	140.23	888.099
LC09	Decompensated liver cirrhosis	LC09_bin59	243	2695	41.73	8085.43	90.16	1.23	Bacteria	Bacillota_A	Clostridia	Lachnospirales	Anaerotignaceae	Metalachnospira	Metalachnospira sp902406135	74013	1964759	593.328	0.301985	37.6703	238.572
LC09	Decompensated liver cirrhosis	LC09_bin61	284	3446	56.32	6671.48	84.71	0.67	Bacteria	Bacillota_A	Clostridia	Oscillospirales	Ruminococcaceae	Merdimmobilis	Merdimmobilis hominis	62173	1894699	498.412	0.263056	32.8142	207.817
LC09	Decompensated liver cirrhosis	LC09_bin51	201	19484	60.82	11153.9	84.69	1.34	Bacteria	Bacillota_A	Clostridia	Oscillospirales	Oscillospiraceae	UMGS1766	Unclassified_UMGS1766	72385	2241934	580.277	0.258829	32.2869	204.478
LC09	Decompensated liver cirrhosis	LC09_bin5	87	254290	50.48	65440.1	79.56	4.64	Bacteria	Bacillota_A	Clostridia	Lachnospirales	Lachnospiraceae	Enterocloster	Enterocloster pacaense	370810	5693289	2972.61	0.522126	65.1311	412.485
LC09	Decompensated liver cirrhosis	LC09_bin40	274	15779	48.29	10321.8	72.93	0	Bacteria	Bacillota_A	Clostridia	Lachnospirales	Lachnospiraceae	Mediterraneibacter	Mediterraneibacter sp900541505	84780	2828176	679.642	0.240311	29.9769	189.848
LC09	Decompensated liver cirrhosis	LC09_bin62	86	29672	42.33	16516.5	70.85	0.19	Bacteria	Bacillota	Bacilli	Lactobacillales	Streptococcaceae	Streptococcus	Streptococcus caecimuris	77408	1420421	620.544	0.436873	54.4965	345.135
LC09	Decompensated liver cirrhosis	LC09_bin63	147	17847	60.06	9613.76	70.15	0.37	Bacteria	Bacillota_A	Clostridia	Oscillospirales	Butyricicoccaceae	Agathobaculum	Agathobaculum ammoniilyticum	40963	1413222	328.382	0.232364	28.9855	183.57
LC10	Decompensated liver cirrhosis	LC10_bin41	15	441922	38.71	140726	100	0	Bacteria	Bacillota_C	Negativicutes	Veillonellales	Veillonellaceae	Veillonella	Veillonella sp018376995	529697	2110896	6839.6	3.24014	250.935	2188.9
LC10	Decompensated liver cirrhosis	LC10_bin34	27	182959	58.5	94667.7	100	0.45	Bacteria	Actinomycetota	Actinomycetes	Actinomycetales	Bifidobacteriaceae	Bifidobacterium	Bifidobacterium dentium	489170	2556027	6316.31	2.47114	191.379	1669.4
LC10	Decompensated liver cirrhosis	LC10_bin39	59	12727	39.72	36713.7	99.63	0.56	Bacteria	Bacillota	Bacilli	Lactobacillales	Streptococcaceae	Streptococcus	Streptococcus salivarius	1005886	2166110	12988.3	5.99614	464.374	4050.73
LC10	Decompensated liver cirrhosis	LC10_bin44	17	649334	52.5	111562	99.6	0	Bacteria	Bacillota_A	Clostridia	Christensenellales	QAND01	UMGS1975	UMGS1975 sp959600905	276161	1896548	3565.87	1.88019	145.612	1270.18
LC10	Decompensated liver cirrhosis	LC10_bin28	59	75938	46.77	49616.2	99.46	0.91	Bacteria	Bacillota	Bacilli	Lactobacillales	Lactobacillaceae	Lacticaseibacillus	Lacticaseibacillus rhamnosus	1712196	2927354	22108.4	7.55234	584.895	5102.04
LC10	Decompensated liver cirrhosis	LC10_bin6	47	783387	44.87	109278	99.42	0.19	Bacteria	Bacteroidota	Bacteroidia	Bacteroidales	Tannerellaceae	Parabacteroides	Parabacteroides distasonis	2416915	5136054	31207.9	6.07624	470.578	4104.85
LC10	Decompensated liver cirrhosis	LC10_bin11	108	98265	59.91	39675.3	99.41	0.59	Bacteria	Desulfobacterota	Desulfovibrionia	Desulfovibrionales	Desulfovibrionaceae	Bilophila	Bilophila wadsworthia	1049662	4284936	13553.5	3.16307	244.966	2136.83
LC10	Decompensated liver cirrhosis	LC10_bin21	52	75644	44.44	62191.2	99.38	2.78	Bacteria	Bacillota	Bacilli	Lactobacillales	Lactobacillaceae	Lactiplantibacillus	Lactiplantibacillus plantarum	1002007	3233941	12938.2	4.00076	309.841	2702.74
LC10	Decompensated liver cirrhosis	LC10_bin12	264	11346	41.3	14932.1	99.37	0.16	Bacteria	Bacillota_A	Clostridia	Lachnospirales	Lachnospiraceae	Blautia_A	Blautia_A wexlerae	4150052	3942079	53586.7	13.5935	1052.76	9183.19
LC10	Decompensated liver cirrhosis	LC10_bin37	33	68917	56.89	71925.3	99.33	0	Bacteria	Bacillota_A	Clostridia	Oscillospirales	Acutalibacteraceae	Acutalibacter	Acutalibacter sp900548545	161908	2373535	2090.6	0.880798	68.2139	595.029
LC10	Decompensated liver cirrhosis	LC10_bin20	97	91206	43.95	33832.6	99.33	4.19	Bacteria	Bacillota_A	Clostridia	Lachnospirales	Lachnospiraceae	Anaerostipes	Anaerostipes caccae	1067328	3281758	13781.7	4.19947	325.231	2836.98
LC10	Decompensated liver cirrhosis	LC10_bin19	20	206443	58.13	166039	99.28	0.48	Bacteria	Bacteroidota	Bacteroidia	Bacteroidales	Rikenellaceae	Alistipes	Alistipes onderdonkii	1768146	3320788	22830.8	6.87512	532.448	4644.54
LC10	Decompensated liver cirrhosis	LC10_bin8	70	641015	43.34	71242.9	99.26	0.01	Bacteria	Bacteroidota	Bacteroidia	Bacteroidales	Bacteroidaceae	Bacteroides	Bacteroides fragilis	4510394	4987002	58239.5	11.6783	904.43	7889.33
LC10	Decompensated liver cirrhosis	LC10_bin9	114	87888	42.15	43380.9	99.25	0	Bacteria	Bacteroidota	Bacteroidia	Bacteroidales	Bacteroidaceae	Phocaeicola	Phocaeicola vulgatus	6877390	4945419	88802.9	17.9566	1390.66	12130.7
LC10	Decompensated liver cirrhosis	LC10_bin22	38	45105	64.08	84904.4	99.19	0	Bacteria	Actinomycetota	Coriobacteriia	Coriobacteriales	Eggerthellaceae	Eggerthella	Eggerthella lenta	457049	3226369	5901.55	1.82916	141.66	1235.7
LC10	Decompensated liver cirrhosis	LC10_bin1	227	298108	46.82	31863.1	98.85	4.89	Bacteria	Bacillota_A	Clostridia	Lachnospirales	Lachnospiraceae	Eisenbergiella	Eisenbergiella tayi	310460	7232931	4008.75	0.554236	42.9231	374.418
LC10	Decompensated liver cirrhosis	LC10_bin23	51	196592	46.31	61870.8	98.83	4.09	Bacteria	Bacillota_A	Clostridia	Lachnospirales	Lachnospiraceae	Clostridium_AP	Clostridium_AP scindens	903173	3155411	11662	3.69589	286.23	2496.78
LC10	Decompensated liver cirrhosis	LC10_bin43	34	130088	42.16	57339	98.79	0.19	Bacteria	Bacillota	Bacilli	Lactobacillales	Streptococcaceae	Streptococcus	Unclassified_Streptococcus	175082	1949525	2260.71	1.15962	89.8075	783.39
LC10	Decompensated liver cirrhosis	LC10_bin36	175	19800	48.73	13828.4	98.75	0.62	Bacteria	Pseudomonadota	Gammaproteobacteria	Burkholderiales	Burkholderiaceae	Parasutterella	Parasutterella sp900552195	641656	2419967	8285.25	3.4237	265.151	2312.91
LC10	Decompensated liver cirrhosis	LC10_bin3	111	82224	41.99	57175.6	98.12	0.19	Bacteria	Bacteroidota	Bacteroidia	Bacteroidales	Bacteroidaceae	Bacteroides	Bacteroides ovatus	3923932	6346491	50667	7.98346	618.284	5393.28
LC10	Decompensated liver cirrhosis	LC10_bin29	53	161803	50.28	54237.4	97.99	0	Bacteria	Bacillota_A	Clostridia	Oscillospirales	Acutalibacteraceae	Clostridium_A	Clostridium_A leptum	1980599	2874582	25574.1	8.89663	689.004	6010.18
LC10	Decompensated liver cirrhosis	LC10_bin42	23	175800	38.64	91307.4	97.99	0	Bacteria	Bacillota_A	Clostridia	Oscillospirales	Acutalibacteraceae	UMGS1071	UMGS1071 sp900542375	483756	2100070	6246.4	2.97438	230.352	2009.36
LC10	Decompensated liver cirrhosis	LC10_bin33	27	149465	40.72	96761.7	97.99	0.89	Bacteria	Bacillota_A	Clostridia	Lachnospirales	Anaerotignaceae	Metalachnospira	Metalachnospira sp900546215	249425	2612566	3220.65	1.23275	95.4713	832.795
LC10	Decompensated liver cirrhosis	LC10_bin25	53	222614	46.69	56487.9	97.68	0	Bacteria	Bacillota_A	Clostridia	Lachnospirales	Lachnospiraceae	Enterocloster	Enterocloster sp001517625	251926	2993857	3252.94	1.08654	84.1476	734.019
LC10	Decompensated liver cirrhosis	LC10_bin18	67	74307	59.26	52047.1	97.62	1.59	Bacteria	Bacillota_A	Clostridia	Oscillospirales	Ruminococcaceae	Gemmiger	Gemmiger variabilis_C	241379	3487156	3116.76	0.893782	69.2194	603.801
LC10	Decompensated liver cirrhosis	LC10_bin17	155	14917	38.46	22716.9	97.32	4.19	Bacteria	Bacillota_A	Clostridia	Lachnospirales	Lachnospiraceae	Anaerobutyricum	Anaerobutyricum hallii	3050897	3521120	39394.1	11.1879	866.456	7558.09
LC10	Decompensated liver cirrhosis	LC10_bin14	134	300342	56.64	27632.3	97.28	0.14	Bacteria	Bacillota_A	Clostridia	Oscillospirales	Ruminococcaceae	Ruthenibacterium	Ruthenibacterium lactatiformans	4124581	3702729	53257.8	14.3834	1113.93	9716.8
LC10	Decompensated liver cirrhosis	LC10_bin7	118	17384	50.53	43117.1	96.86	0	Bacteria	Bacillota_A	Clostridia	Lachnospirales	Lachnospiraceae	Enterocloster	Enterocloster aldenensis	325961	5087820	4208.9	0.827251	64.0669	558.855
LC10	Decompensated liver cirrhosis	LC10_bin2	125	308342	48.2	55097.3	96.84	2.53	Bacteria	Bacillota_A	Clostridia	Lachnospirales	Lachnospiraceae	Hungatella	Hungatella hathewayi	4428948	6887164	57187.9	8.30355	643.073	5609.52
LC10	Decompensated liver cirrhosis	LC10_bin32	68	55365	46.48	39531.7	96.81	0	Bacteria	Bacillota	Bacilli	Lactobacillales	Lactobacillaceae	Lacticaseibacillus	Lacticaseibacillus paracasei	898042	2688155	11595.8	4.31366	334.074	2914.12
LC10	Decompensated liver cirrhosis	LC10_bin13	74	212266	60.93	52660.4	96.64	0.81	Bacteria	Bacillota_A	Clostridia	Oscillospirales	Oscillospiraceae	Flavonifractor	Flavonifractor plautii	1132437	3896867	14622.4	3.75234	290.602	2534.92
LC10	Decompensated liver cirrhosis	LC10_bin4	49	185953	47.04	107859	94.94	0.63	Bacteria	Bacillota_A	Clostridia	Lachnospirales	Lachnospiraceae	Blautia	Blautia celeris	1131194	5285110	14606.3	2.76367	214.034	1867.02
LC10	Decompensated liver cirrhosis	LC10_bin47	35	37592	38.8	51106.3	94.04	1.2	Bacteria	Bacillota	Bacilli	Lactobacillales	Streptococcaceae	Streptococcus	Streptococcus vaginalis	89610	1788722	1157.07	0.64687	50.0972	436.998
LC10	Decompensated liver cirrhosis	LC10_bin26	59	171461	57.53	50126.6	91.11	0.67	Bacteria	Bacillota_A	Clostridia	Oscillospirales	Oscillospiraceae	Lawsonibacter	Lawsonibacter sp000177015	373473	2957467	4822.39	1.63058	126.281	1101.55
LC10	Decompensated liver cirrhosis	LC10_bin10	29	530529	50.56	148622	91.01	0	Bacteria	Pseudomonadota	Gammaproteobacteria	Enterobacterales	Enterobacteriaceae	Escherichia	Escherichia coli	1232891	4310024	15919.5	3.69359	286.052	2495.23
LC10	Decompensated liver cirrhosis	LC10_bin45	54	41413	38.74	33893.9	90.22	1.45	Bacteria	Bacillota	Bacilli	Lactobacillales	Lactobacillaceae	Limosilactobacillus	Limosilactobacillus reuteri	1300336	1830271	16790.3	9.17368	710.461	6197.34
LC10	Decompensated liver cirrhosis	LC10_bin24	57	91802	43.19	54789.4	89.24	0	Bacteria	Bacillota_A	Clostridia	Lachnospirales	Lachnospiraceae	Blautia_A	Blautia_A faecis	529844	3122994	6841.5	2.19069	169.659	1479.93
LC10	Decompensated liver cirrhosis	LC10_bin31	48	347399	41.11	57875	88.61	0	Bacteria	Bacillota_A	Clostridia	Lachnospirales	Lachnospiraceae	Faecalimonas	Faecalimonas umbilicata	899253	2778002	11611.4	4.17977	323.705	2823.68
LC10	Decompensated liver cirrhosis	LC10_bin40	29	91343	60.48	73538.8	88.57	0.02	Bacteria	Bacillota_A	Clostridia	Oscillospirales	Oscillospiraceae	Dysosmobacter	Dysosmobacter welbionis	360641	2132626	4656.7	2.18355	169.107	1475.11
LC10	Decompensated liver cirrhosis	LC10_bin5	61	96662	49.39	85048.1	87.99	0.63	Bacteria	Bacillota_A	Clostridia	Lachnospirales	Lachnospiraceae	Enterocloster	Enterocloster bolteae	720705	5187937	9305.96	1.79377	138.919	1211.79
LC10	Decompensated liver cirrhosis	LC10_bin27	34	227080	50.35	86196.3	87.97	0.32	Bacteria	Bacillota_A	Clostridia	Lachnospirales	Lachnospiraceae	Otoolea	Otoolea saccharolyticum_A	273342	2930675	3529.47	1.20432	93.2693	813.587
LC10	Decompensated liver cirrhosis	LC10_bin35	23	228904	43.76	110101	75.32	0	Bacteria	Bacillota_A	Clostridia	Lachnospirales	Lachnospiraceae	Blautia_A	Blautia_A caecimuris	165472	2532329	2136.62	0.843738	65.3438	569.993
LC10	Decompensated liver cirrhosis	LC10_bin48	117	11048	59.13	15058.3	71.39	0.67	Bacteria	Bacillota_A	Clostridia	Oscillospirales	Butyricicoccaceae	Agathobaculum	Agathobaculum ammoniilyticum	55979	1761824	722.817	0.410267	31.7733	277.158
LC11	Decompensated liver cirrhosis	LC11_bin30	25	143717	59.58	85892.1	100	3.26	Bacteria	Actinomycetota	Actinomycetes	Actinomycetales	Bifidobacteriaceae	Bifidobacterium	Bifidobacterium adolescentis	3316854	2147303	48752.1	22.7039	1544.66	10657.2
LC11	Decompensated liver cirrhosis	LC11_bin26	27	400305	43.84	87789.8	99.98	1.65	Bacteria	Bacillota_C	Negativicutes	Acidaminococcales	Acidaminococcaceae	Phascolarctobacterium	Phascolarctobacterium faecium	600628	2370325	8828.22	3.72448	253.395	1748.26
LC11	Decompensated liver cirrhosis	LC11_bin10	16	288756	43.4	204127	99.62	0	Bacteria	Bacteroidota	Bacteroidia	Bacteroidales	Barnesiellaceae	Barnesiella	Barnesiella intestinihominis	624135	3266031	9173.73	2.80883	191.099	1318.46
LC11	Decompensated liver cirrhosis	LC11_bin3	50	193681	44.89	96041.2	99.42	0.38	Bacteria	Bacteroidota	Bacteroidia	Bacteroidales	Tannerellaceae	Parabacteroides	Parabacteroides distasonis	605823	4802061	8904.57	1.85432	126.159	870.417
LC11	Decompensated liver cirrhosis	LC11_bin21	90	64067	63.65	29057.2	99.41	0.59	Bacteria	Desulfobacterota	Desulfovibrionia	Desulfovibrionales	Desulfovibrionaceae	Desulfovibrio	Desulfovibrio sp900556755	117182	2615152	1722.38	0.658615	44.8089	309.153
LC11	Decompensated liver cirrhosis	LC11_bin35	7	210686	53.23	259521	99.19	0.81	Bacteria	Actinomycetota	Coriobacteriia	Coriobacteriales	Eggerthellaceae	Anaerotardibacter	Anaerotardibacter sp000436075	168681	1816645	2479.33	1.36478	92.853	640.627
LC11	Decompensated liver cirrhosis	LC11_bin25	31	253884	54.3	77619.4	99.04	0.96	Bacteria	Bacteroidota	Bacteroidia	Bacteroidales	Rikenellaceae	Alistipes	Alistipes putredinis	550696	2406202	8094.3	3.36393	228.865	1579.03
LC11	Decompensated liver cirrhosis	LC11_bin18	75	17118	37.04	36066.8	98.25	4.31	Bacteria	Bacillota_A	Clostridia	Lachnospirales	Lachnospiraceae	Anaerostipes	Anaerostipes hadrus	2841729	2705009	41768.6	15.4412	1050.54	7248.09
LC11	Decompensated liver cirrhosis	LC11_bin33	18	582925	45.16	106111	98.1	1.27	Bacteria	Bacillota_C	Negativicutes	Veillonellales	Dialisteraceae	Dialister	Dialister invisus	144110	1910005	2118.17	1.10899	75.4501	520.558
LC11	Decompensated liver cirrhosis	LC11_bin15	74	31422	52.68	41483.7	98.03	0	Bacteria	Bacteroidota	Bacteroidia	Bacteroidales	Bacteroidaceae	Prevotella	Prevotella sp003447235	338753	3069794	4979.1	1.62196	110.35	761.348
LC11	Decompensated liver cirrhosis	LC11_bin16	54	35505	43.74	56104.7	97.32	2.01	Bacteria	Bacillota_A	Clostridia	Lachnospirales	Lachnospiraceae	Coprococcus_A	Coprococcus_A catus	881136	3029653	12951.2	4.27482	290.837	2006.59
LC11	Decompensated liver cirrhosis	LC11_bin12	49	72654	57.88	63644.7	97.28	0.68	Bacteria	Verrucomicrobiota	Verrucomicrobiae	Verrucomicrobiales	Akkermansiaceae	Akkermansia	Akkermansia massiliensis	856303	3118588	12586.2	4.03587	274.58	1894.43
LC11	Decompensated liver cirrhosis	LC11_bin17	279	11462	55.67	10025.4	97.24	0.68	Bacteria	Bacillota_A	Clostridia	Oscillospirales	Ruminococcaceae	Gemmiger	Gemmiger qucibialis	1408021	2797072	20695.5	7.399	503.391	3473.08
LC11	Decompensated liver cirrhosis	LC11_bin24	38	306563	59.86	63916.7	96.72	0.65	Bacteria	Actinomycetota	Actinomycetes	Actinomycetales	Bifidobacteriaceae	Bifidobacterium	Bifidobacterium longum	1393945	2428834	20488.6	8.43558	573.915	3959.65
LC11	Decompensated liver cirrhosis	LC11_bin23	53	92574	58.25	46609.3	96.64	0.67	Bacteria	Bacillota_A	Clostridia	Oscillospirales	Oscillospiraceae	Evtepia	Evtepia gabavorous	154122	2470294	2265.33	0.91703	62.3901	430.453
[truncated: 269 more rows]

## Sheet: Plasmid Sequences
Summary of constructed plasmid sequences. Table includes summary information for reconstructed plasmid genomes after filtering using a 5% contamination and 50% completeness cutoff. Genome Bin column indicates whether the genome was a multi-contig MAG (pMAG) or identified as a single contig (pContig). Abundance values are shown for the sample where the genome was reconstructed.
[truncated: 706 more rows]

[truncated: 4 more sheets: Phage Sequences, ARGs, VFs, Rifamixin]
